# Supplementary material for: The photo-inhibition of camphor leaves (Cinnamomum camphora L.) by NaCl stress based on physiological, chloroplast structure and comparative proteomic analysis
Source: PeerJ. 2020 Aug 7;8:e9443. doi: 10.7717/peerj.9443 (PMC7486828; doi:10.7717/peerj.9443)
Supplement: Supplemental Information 2 [file peerj-08-9443-s002.xlsx]

## Sheet: Sheet1
The data of three period treatments
TIME	NACL	CHA	CHB	cha/chb	chl	MDA	POD	SOD	Fm	Fv/Fm	NPQ	Θpsii	qp	Hd	AN	gs	Ci/Ca	WUEI
1	1	2.37785	0.766029	3.10413	3.14388	4.3239	383.333	274.32	18387	0.715	2.009	0.387254	2.31226	0.534	3.6	127	0.927368	0.0283465
1	1	2.47873	0.797869	3.10668	3.2766	3.69547	662.5	215.768	18094	0.735	2.136	0.389197	2.23904	0.529	3.1	147	0.973158	0.0210884
1	1	3.06094	1.00397	3.04883	4.06491	5.0124	375	246.657	18532	0.746	2.296	0.402816	2.71523	0.525	3.7	119	0.966842	0.0310924
1	2	1.11157	0.362662	3.06503	1.47511	33.1996	40.375	921.534	12306	0.603	2.206	0.260696	0.818539	0.603	2	60.315	0.813082	0.0331592
1	2	1.11277	0.363541	3.06091	1.47543	30.2698	52.125	780.531	5936	0.592	1.29	0.216962	0.713127	0.563	1.9	51.333	0.799725	0.0370132
1	2	1.94452	0.578242	3.36282	2.52276	25.3166	45.0125	837.758	5286	0.708	2.349	0.220502	0.708976	0.445	2.1	44	0.822352	0.0477273
2	3	2.645	0.792	3.33965	3.437	3.533	338.625	179.941	16988	0.779	2.974	0.210921	1.66052	0.526	3.4	133	0.997368	0.0255639
2	3	2.726	0.815	3.34479	3.541	4.737	714.25	211.799	20930	0.772	2.686	0.334408	2.03309	0.516	3	147	0.913158	0.022449
2	3	2.351	0.731	3.21614	3.082	5.63	377.125	289.676	20279	0.793	3.103	0.371048	2.36045	0.511	3.1	78	0.936842	0.0397436
2	4	0.314767	0.112442	2.79937	0.427209	34.1426	20.5	235.131	7424	0.402	1.16	0.202804	0.824008	0.659	0.666667	13.6667	0.930817	0.0487805
2	4	0.595599	0.204161	2.9173	0.79976	35.5982	12.425	269.249	9016	0.479	1.598	0.199193	0.745283	0.68	0.333333	8.66667	0.929725	0.0384615
2	4	0.705139	0.228426	3.08694	0.933565	33.1893	18.325	278.93	7760	0.427	0.927	0.110661	0.600259	0.646	0.466667	12	0.912352	0.0388889
3	5	2.1014	0.615486	3.41422	3.35393	7.77133	332.543	237.398	16367	0.687	1.719	0.299764	2.08982	0.544	3.1	128	0.987368	0.0242188
3	5	2.26735	0.622524	3.64219	2.85284	4.63512	499.863	205.691	15581	0.723	2.585	0.258202	1.7253	0.563	2.9	133	0.913158	0.0218045
3	5	3.54939	1.05555	3.36261	4.00494	5.20863	409.014	240.593	12151	0.697	2.396	0.295918	1.91646	0.578	3	77	0.906842	0.038961
3	6	0.209023	0.0889695	2.34937	0.297992	66.525	17.5	202.858	3966	0.349	0.666	0.0765208	0.446945	0.711	0.566667	12.0667	0.9663	0.0469613
3	6	0.42609	0.146347	2.91151	0.572437	66.5124	14.425	193.605	4206	0.457	1.088	0.0792896	0.44089	0.639	0.333333	8.33333	0.8642	0.04
3	6	0.660254	0.20093	3.28599	0.861184	76.3606	11.325	151.683	3464	0.468	0.599	0.0601379	0.315068	0.64	0.366667	10	0.9221	0.0366667
The data only in 50 days treatment
N	REP	leaf area growth		N	REP	Hight growth	Diameter growth
1	1	11.92		1	1	18.6	2.75
1	2	8.94		1	2	19.5	3.085
1	3	5.62		1	3	16.68	3.19
2	1	1.1		1	4	17.26	3.24
2	2	0.96		1	5	18.38	3.235
2	3	1.13		2	1	4.42	0.3
				2	2	6.88	0.435
				2	3	7.14	0.335
				2	4	8.06	0.53
				2	5	7.52	0.445
