# Supplementary material for: The photo-inhibition of camphor leaves (Cinnamomum camphora L.) by NaCl stress based on physiological, chloroplast structure and comparative proteomic analysis
Source: PeerJ. 2020 Aug 7;8:e9443. doi: 10.7717/peerj.9443 (PMC7486828; doi:10.7717/peerj.9443)
Supplement: Table S1 [file peerj-08-9443-s003.xlsx]

## Sheet: Down DEPs
Table. S1 The initial data of differential expressed proteins in 0.6% NaCl stress
Number	Unused	Total	Percent Coverage (% cov)	Accession #	Name	Peptides(95%)	Species	115:113	PVal 115:113	116:113	PVal 116:113	115:114	PVal 115:114	116:114	PVal 116:114	FoldChange	Identity	Evalue	Uniprot	Genename	Biological Process	Cell Component	Molecular Function	KEGG Pathways	UNIPROT_URL	Transcription Factor
1396	2	2	14	gi|118482877	unknown [Populus trichocarpa]	3	Populus trichocarpa	0.52	0.5147	0.6194	0.5853	0.3664	0.3552	0.4571	0.3927	0.490725	72.38	5e-48	Q9LF68	BOLA4	GO:0019752,carboxylic acid metabolic process|GO:0044248,cellular catabolic process|GO:0044281,small molecule metabolic process|GO:0044282,small molecule catabolic process|GO:0009438,methylglyoxal metabolic process|GO:0044699,single-organism process|GO:0044712,single-organism catabolic process|GO:0044710,single-organism metabolic process|GO:0071704,organic substance metabolic process|GO:0046185,al…	GO:0005737,cytoplasm|GO:0009536,plastid|GO:0043231,intracellular membrane-bounded organelle|GO:0044464,cell part|GO:0044444,cytoplasmic part|GO:0005739,mitochondrion|GO:0005622,intracellular|GO:0043229,intracellular organelle|GO:0005623,cell|GO:0044424,intracellular part|GO:0043227,membrane-bounded organelle|GO:0043226,organelle|GO:0009507,chloroplast	GO:0005488,binding|GO:0005515,protein binding		http://www.uniprot.org/uniprot/Q9LF68	FALSE
1028	2.05	4.92	51.7	gi|224056321	malate dehydrogenase family protein [Populus trichocarpa]	25	Populus trichocarpa	0.4529	0.3178	0.4529	0.3299	0.5395	0.38	0.5395	0.3968	0.4962	82.44	0	O82399	At2g22780	GO:0034440,lipid oxidation|GO:0009894,regulation of catabolic process|GO:0044238,primary metabolic process|GO:0080090,regulation of primary metabolic process|GO:0031329,regulation of cellular catabolic process|GO:0031326,regulation of cellular biosynthetic process|GO:0031323,regulation of cellular metabolic process|GO:0006631,fatty acid metabolic process|GO:0019752,carboxylic acid metabolic proce…	GO:0005737,cytoplasm|GO:0009536,plastid|GO:0043231,intracellular membrane-bounded organelle|GO:0044464,cell part|GO:0005777,peroxisome|GO:0044444,cytoplasmic part|GO:0005623,cell|GO:0005622,intracellular|GO:0042579,microbody|GO:0043229,intracellular organelle|GO:0044424,intracellular part|GO:0009514,glyoxysome|GO:0043227,membrane-bounded organelle|GO:0043226,organelle|GO:0009507,chloroplast	GO:0016614,oxidoreductase activity, acting on CH-OH group of donors|GO:0016615,malate dehydrogenase activity|GO:0016616,oxidoreductase activity, acting on the CH-OH group of donors, NAD or NADP as acceptor|GO:0003824,catalytic activity|GO:0030060,L-malate dehydrogenase activity|GO:0016491,oxidoreductase activity	ath00630,Glyoxylate and dicarboxylate metabolism|ath00620,Pyruvate metabolism|ath00020,Citrate cycle (TCA cycle)|ath00270,Cysteine and methionine metabolism|ath00710,Carbon fixation in photosynthetic organisms|ath01200,Carbon metabolism|ath01110,Biosynthesis of secondary metabolites|ath01100,Metabolic pathways	http://www.uniprot.org/uniprot/O82399	FALSE
1336	2	2	2.5	gi|224056849	kinase family protein [Populus trichocarpa]	1	Populus trichocarpa	0.3404	0.2236	0.5808	0.403	0.3311	0.218	0.5649	0.3865	0.4543	68.2	0	C0LGR3	At4g26540	GO:0048443,stamen development|GO:0048466,androecium development|GO:0044238,primary metabolic process|GO:0008152,metabolic process|GO:0048569,post-embryonic organ development|GO:0016310,phosphorylation|GO:0009791,post-embryonic development|GO:0032501,multicellular organismal process|GO:0023052,signaling|GO:0007165,signal transduction|GO:0042221,response to chemical|GO:0009653,anatomical structure …	GO:0016021,integral component of membrane|GO:0016020,membrane|GO:0044464,cell part|GO:0005623,cell|GO:0071944,cell periphery|GO:0005886,plasma membrane|GO:0044425,membrane part|GO:0031224,intrinsic component of membrane	GO:0035639,purine ribonucleoside triphosphate binding|GO:0004672,protein kinase activity|GO:0043167,ion binding|GO:1901363,heterocyclic compound binding|GO:0001883,purine nucleoside binding|GO:0001882,nucleoside binding|GO:0043168,anion binding|GO:0000166,nucleotide binding|GO:0004674,protein serine/threonine kinase activity|GO:0016740,transferase activity|GO:1901265,nucleoside phosphate binding|…		http://www.uniprot.org/uniprot/C0LGR3	FALSE
331	8.04	8.04	14	gi|224059444	hypothetical protein POPTR_0001s25160g [Populus trichocarpa]	11	Populus trichocarpa	0.2805	0.1656	0.4487	0.1938	0.3837	0.1185	0.5861	0.1374	0.42475	59.92	9e-177	Q9STF2	T6H20.190	GO:0006778,porphyrin-containing compound metabolic process|GO:0006779,porphyrin-containing compound biosynthetic process|GO:0061024,membrane organization|GO:0044281,small molecule metabolic process|GO:0051656,establishment of organelle localization|GO:1901362,organic cyclic compound biosynthetic process|GO:0015979,photosynthesis|GO:0071840,cellular component organization or biogenesis|GO:0044710,…	GO:0055035,plastid thylakoid membrane|GO:0034357,photosynthetic membrane|GO:0031976,plastid thylakoid|GO:0031975,envelope|GO:0043229,intracellular organelle|GO:0043228,non-membrane-bounded organelle|GO:0042646,plastid nucleoid|GO:0000229,cytoplasmic chromosome|GO:0043227,membrane-bounded organelle|GO:0043226,organelle|GO:0009535,chloroplast thylakoid membrane|GO:0009534,chloroplast thylakoid|GO:0…			http://www.uniprot.org/uniprot/Q9STF2	FALSE
856	2.7	9.95	35.8	gi|224066707	fructose-1 family protein [Populus trichocarpa]	11	Populus trichocarpa	0.2754	0.5165	0.2679	0.5088	0.278	0.4578	0.2805	0.4515	0.27545	88.62	0	Q9MA79	At1g43670	GO:0016311,dephosphorylation|GO:0009311,oligosaccharide metabolic process|GO:0044042,glucan metabolic process|GO:0009312,oligosaccharide biosynthetic process|GO:0044248,cellular catabolic process|GO:0044249,cellular biosynthetic process|GO:0030388,fructose 1,6-bisphosphate metabolic process|GO:0042221,response to chemical|GO:0043170,macromolecule metabolic process|GO:0015979,photosynthesis|GO:004…	GO:0005737,cytoplasm|GO:0043231,intracellular membrane-bounded organelle|GO:0005829,cytosol|GO:0044464,cell part|GO:0044444,cytoplasmic part|GO:0005623,cell|GO:0043226,organelle|GO:0043229,intracellular organelle|GO:0044424,intracellular part|GO:0005622,intracellular|GO:0043227,membrane-bounded organelle|GO:0005634,nucleus	GO:0050308,sugar-phosphatase activity|GO:0019203,carbohydrate phosphatase activity|GO:0042132,fructose 1,6-bisphosphate 1-phosphatase activity|GO:0016791,phosphatase activity|GO:0016787,hydrolase activity|GO:0043169,cation binding|GO:0016788,hydrolase activity, acting on ester bonds|GO:0043167,ion binding|GO:0042578,phosphoric ester hydrolase activity|GO:0003824,catalytic activity|GO:0005488,bind…	ath00030,Pentose phosphate pathway|ath00710,Carbon fixation in photosynthetic organisms|ath00010,Glycolysis / Gluconeogenesis|ath00051,Fructose and mannose metabolism|ath01200,Carbon metabolism|ath01110,Biosynthesis of secondary metabolites|ath01100,Metabolic pathways	http://www.uniprot.org/uniprot/Q9MA79	FALSE
1047	2.04	2.05	15.9	gi|224067920	Mitogen-activated protein kinase 4 [Populus trichocarpa]	3	Populus trichocarpa	0.4699	0.2714	0.4529	0.1555	0.5058	0.305	0.4656	0.1715	0.47355	88.49	0	Q39024	MPK4	GO:0009595,detection of biotic stimulus|GO:0048467,gynoecium development|GO:0019220,regulation of phosphate metabolic process|GO:0080090,regulation of primary metabolic process|GO:0019222,regulation of metabolic process|GO:0006470,protein dephosphorylation|GO:0048585,negative regulation of response to stimulus|GO:0032260,response to jasmonic acid stimulus involved in jasmonic acid and ethylene-de…	GO:0043229,intracellular organelle|GO:0043228,non-membrane-bounded organelle|GO:0043227,membrane-bounded organelle|GO:0043226,organelle|GO:0005856,cytoskeleton|GO:0005874,microtubule|GO:0005634,nucleus|GO:0044430,cytoskeletal part|GO:0005737,cytoplasm|GO:0015630,microtubule cytoskeleton|GO:0009504,cell plate|GO:0043234,protein complex|GO:0032991,macromolecular complex|GO:0043231,intracellular mem…	GO:0035639,purine ribonucleoside triphosphate binding|GO:0060089,molecular transducer activity|GO:0005488,binding|GO:0004871,signal transducer activity|GO:0043167,ion binding|GO:1901363,heterocyclic compound binding|GO:0001883,purine nucleoside binding|GO:0001882,nucleoside binding|GO:0043168,anion binding|GO:0005057,receptor signaling protein activity|GO:0032549,ribonucleoside binding|GO:0000166…	ath04626,Plant-pathogen interaction|ath04933,AGE-RAGE signaling pathway in diabetic complications	http://www.uniprot.org/uniprot/Q39024	FALSE
964	2.2	2.25	28.3	gi|224075014	hypothetical protein POPTR_0003s13230g [Populus trichocarpa]	4	Populus trichocarpa	0.492	0.5325	0.2559	0.3859	0.7047	0.6884	0.3597	0.4778	0.453075	89.6	1e-112	Q9CAK8	ISPF	GO:0080090,regulation of primary metabolic process|GO:0019222,regulation of metabolic process|GO:0051049,regulation of transport|GO:0006778,porphyrin-containing compound metabolic process|GO:0006779,porphyrin-containing compound biosynthetic process|GO:0061024,membrane organization|GO:0044281,small molecule metabolic process|GO:0044283,small molecule biosynthetic process|GO:1901362,organic cyclic…	GO:0005737,cytoplasm|GO:0009536,plastid|GO:0043231,intracellular membrane-bounded organelle|GO:0009532,plastid stroma|GO:0009570,chloroplast stroma|GO:0044464,cell part|GO:0044444,cytoplasmic part|GO:0005623,cell|GO:0005622,intracellular|GO:0044446,intracellular organelle part|GO:0043229,intracellular organelle|GO:0044435,plastid part|GO:0044434,chloroplast part|GO:0044424,intracellular part|GO:0…	GO:0043169,cation binding|GO:0008685,2-C-methyl-D-erythritol 2,4-cyclodiphosphate synthase activity|GO:0016829,lyase activity|GO:0016849,phosphorus-oxygen lyase activity|GO:0043167,ion binding|GO:0003824,catalytic activity|GO:0005488,binding|GO:0046872,metal ion binding	ath01110,Biosynthesis of secondary metabolites|ath01100,Metabolic pathways|ath00900,Terpenoid backbone biosynthesis	http://www.uniprot.org/uniprot/Q9CAK8	FALSE
56	23.52	38.74	41.8	gi|224077478	hypothetical protein POPTR_0004s07190g [Populus trichocarpa]	36	Populus trichocarpa	0.413	0.009	0.3565	0.048	0.4613	0.0374	0.3802	0.1202	0.40275	90.71	0	P27323	HSP90-1	GO:0006457,protein folding|GO:0042742,defense response to bacterium|GO:0044267,cellular protein metabolic process|GO:0043207,response to external biotic stimulus|GO:0009617,response to bacterium|GO:0071704,organic substance metabolic process|GO:0045087,innate immune response|GO:0009987,cellular process|GO:0006952,defense response|GO:0006950,response to stress|GO:0098542,defense response to other …	GO:0005737,cytoplasm|GO:0044464,cell part|GO:0005623,cell|GO:0005622,intracellular|GO:0044424,intracellular part	GO:0035639,purine ribonucleoside triphosphate binding|GO:0005488,binding|GO:0043167,ion binding|GO:1901363,heterocyclic compound binding|GO:1901265,nucleoside phosphate binding|GO:0001882,nucleoside binding|GO:0043168,anion binding|GO:0051082,unfolded protein binding|GO:0000166,nucleotide binding|GO:0001883,purine nucleoside binding|GO:0032549,ribonucleoside binding|GO:0017076,purine nucleotide b…	ath04626,Plant-pathogen interaction|ath04141,Protein processing in endoplasmic reticulum	http://www.uniprot.org/uniprot/P27323	FALSE
579	4.47	19.77	65.4	gi|224094610	O2 evolving complex 33kD family protein [Populus trichocarpa]	57	Populus trichocarpa	0.4018	0.4754	0.0625	0.02	0.4093	0.236	0.0608	0.0138	0.2336	78.85	0	Q9S841	PSBO2	GO:0008104,protein localization|GO:0019220,regulation of phosphate metabolic process|GO:0080090,regulation of primary metabolic process|GO:0019222,regulation of metabolic process|GO:0019682,glyceraldehyde-3-phosphate metabolic process|GO:0048585,negative regulation of response to stimulus|GO:0051667,establishment of plastid localization|GO:0048583,regulation of response to stimulus|GO:0031348,neg…	GO:0055035,plastid thylakoid membrane|GO:0034357,photosynthetic membrane|GO:0031976,plastid thylakoid|GO:0031977,thylakoid lumen|GO:0019898,extrinsic component of membrane|GO:0043229,intracellular organelle|GO:0005622,intracellular|GO:0009654,photosystem II oxygen evolving complex|GO:0043226,organelle|GO:0031224,intrinsic component of membrane|GO:0009535,chloroplast thylakoid membrane|GO:0009534,…	GO:0005488,binding|GO:0043169,cation binding|GO:0005515,protein binding|GO:0097159,organic cyclic compound binding|GO:0043167,ion binding|GO:0008266,poly(U) RNA binding|GO:0003727,single-stranded RNA binding|GO:0003723,RNA binding|GO:0003676,nucleic acid binding|GO:0008187,poly-pyrimidine tract binding|GO:0046872,metal ion binding|GO:1901363,heterocyclic compound binding|GO:0005509,calcium ion bi…	ath00195,Photosynthesis|ath01100,Metabolic pathways	http://www.uniprot.org/uniprot/Q9S841	FALSE
1298	2	2	6.5	gi|224096758	hypothetical protein POPTR_0007s10990g [Populus trichocarpa]	1	Populus trichocarpa	0.52	0.3491	0.3048	0.2039	0.5105	0.3377	0.2965	0.1997	0.40795			Q9FGC8	At5g67020					http://www.uniprot.org/uniprot/Q9FGC8	FALSE
39	28.09	28.1	79.1	gi|224104247	aminotransferase 2 family protein [Populus trichocarpa]	52	Populus trichocarpa	0.3404	0.0539	0.3597	0.0119	0.3767	0.035	0.3981	0.0077	0.368725	85.79	0	Q56YA5	AGT1	GO:0008152,metabolic process|GO:0006950,response to stress|GO:0050801,ion homeostasis|GO:0042592,homeostatic process|GO:0044249,cellular biosynthetic process|GO:0042221,response to chemical|GO:0009651,response to salt stress|GO:0044699,single-organism process|GO:0009750,response to fructose|GO:0010033,response to organic substance|GO:0065007,biological regulation|GO:0065008,regulation of biologic…	GO:0048046,apoplast|GO:0042579,microbody|GO:0043229,intracellular organelle|GO:0071944,cell periphery|GO:0043227,membrane-bounded organelle|GO:0043226,organelle|GO:0005737,cytoplasm|GO:0009536,plastid|GO:0009532,plastid stroma|GO:0009570,chloroplast stroma|GO:0016020,membrane|GO:0005777,peroxisome|GO:0044435,plastid part|GO:0044434,chloroplast part|GO:0005886,plasma membrane|GO:0009507,chloroplas…	GO:0008453,alanine-glyoxylate transaminase activity|GO:0003824,catalytic activity|GO:0008483,transaminase activity|GO:0016740,transferase activity|GO:0004760,serine-pyruvate transaminase activity|GO:0050281,serine-glyoxylate transaminase activity|GO:0016769,transferase activity, transferring nitrogenous groups	ath00630,Glyoxylate and dicarboxylate metabolism|ath04146,Peroxisome|ath00260,Glycine, serine and threonine metabolism|ath00250,Alanine, aspartate and glutamate metabolism|ath01200,Carbon metabolism|ath01110,Biosynthesis of secondary metabolites|ath01100,Metabolic pathways	http://www.uniprot.org/uniprot/Q56YA5	FALSE
916	2.38	2.47	35.8	gi|224109602	60S ribosomal protein L35 [Populus trichocarpa]	3	Populus trichocarpa	0.2831	0.1616	0.492	0.2793	0.2333	0.0924	0.4018	0.143	0.35255	88.62	1e-71	O80626	RPL35B	GO:0044249,cellular biosynthetic process|GO:0034641,cellular nitrogen compound metabolic process|GO:0006807,nitrogen compound metabolic process|GO:0034645,cellular macromolecule biosynthetic process|GO:1901576,organic substance biosynthetic process|GO:0044267,cellular protein metabolic process|GO:0044260,cellular macromolecule metabolic process|GO:0043043,peptide biosynthetic process|GO:0071704,o…	GO:0015934,large ribosomal subunit|GO:0022625,cytosolic large ribosomal subunit|GO:0043229,intracellular organelle|GO:0043228,non-membrane-bounded organelle|GO:0022626,cytosolic ribosome|GO:0043227,membrane-bounded organelle|GO:0043226,organelle|GO:0005737,cytoplasm|GO:0030529,ribonucleoprotein complex|GO:0005794,Golgi apparatus|GO:0044391,ribosomal subunit|GO:0012505,endomembrane system|GO:00058…	GO:0003735,structural constituent of ribosome|GO:0005198,structural molecule activity	ath03010,Ribosome	http://www.uniprot.org/uniprot/O80626	FALSE
932	2.31	4.44	14.3	gi|224117218	NADPH-protochlorophyllide oxidoreductase family protein [Populus trichocarpa]	2	Populus trichocarpa	0.3733	0.1762	0.52	0.4767	0.3532	0.1593	0.492	0.3807	0.434625	78.77	0	Q42536	PORA	GO:0006778,porphyrin-containing compound metabolic process|GO:0006779,porphyrin-containing compound biosynthetic process|GO:0044249,cellular biosynthetic process|GO:0034641,cellular nitrogen compound metabolic process|GO:0006807,nitrogen compound metabolic process|GO:0042221,response to chemical|GO:1901362,organic cyclic compound biosynthetic process|GO:0015979,photosynthesis|GO:0044699,single-or…	GO:0031976,plastid thylakoid|GO:0031975,envelope|GO:0043229,intracellular organelle|GO:0043227,membrane-bounded organelle|GO:0043226,organelle|GO:0005737,cytoplasm|GO:0009534,chloroplast thylakoid|GO:0031984,organelle subcompartment|GO:0044435,plastid part|GO:0044434,chloroplast part|GO:0009579,thylakoid|GO:0009941,chloroplast envelope|GO:0031967,organelle envelope|GO:0009536,plastid|GO:0009507,c…	GO:0016628,oxidoreductase activity, acting on the CH-CH group of donors, NAD or NADP as acceptor|GO:0016627,oxidoreductase activity, acting on the CH-CH group of donors|GO:0016630,protochlorophyllide reductase activity|GO:0003824,catalytic activity|GO:0016491,oxidoreductase activity	ath00860,Porphyrin and chlorophyll metabolism|ath01110,Biosynthesis of secondary metabolites|ath01100,Metabolic pathways	http://www.uniprot.org/uniprot/Q42536	FALSE
440	6.13	6.15	20.6	gi|224120952	heat shock 22K family protein [Populus trichocarpa]	10	Populus trichocarpa	0.3281	0.286	0.3221	0.2922	0.2938	0.2813	0.2704	0.2873	0.3036	62.86	1e-71	P31170	HSP25.3	GO:0006457,protein folding|GO:0009314,response to radiation|GO:0000302,response to reactive oxygen species|GO:0009416,response to light stimulus|GO:0042221,response to chemical|GO:0044267,cellular protein metabolic process|GO:0010035,response to inorganic substance|GO:0044260,cellular macromolecule metabolic process|GO:0009642,response to light intensity|GO:0071704,organic substance metabolic pro…	GO:0005737,cytoplasm|GO:0009536,plastid|GO:0043231,intracellular membrane-bounded organelle|GO:0044464,cell part|GO:0044444,cytoplasmic part|GO:0005623,cell|GO:0005622,intracellular|GO:0043229,intracellular organelle|GO:0044424,intracellular part|GO:0043227,membrane-bounded organelle|GO:0043226,organelle|GO:0009507,chloroplast		ath04141,Protein processing in endoplasmic reticulum	http://www.uniprot.org/uniprot/P31170	FALSE
167	12.63	17.98	66	gi|224131818	chlorophyll a/b-binding family protein [Populus trichocarpa]	69	Populus trichocarpa	0.1306	0.2307	0.2128	0.1879	0.1019	0.1293	0.1644	0.1095	0.152425	90.94	0	Q9SHR7	LHCB2.1	GO:0009314,response to radiation|GO:0009416,response to light stimulus|GO:0006091,generation of precursor metabolites and energy|GO:0015979,photosynthesis|GO:0044267,cellular protein metabolic process|GO:0009639,response to red or far red light|GO:0044260,cellular macromolecule metabolic process|GO:0019684,photosynthesis, light reaction|GO:0009637,response to blue light|GO:0010218,response to far…	GO:0055035,plastid thylakoid membrane|GO:0034357,photosynthetic membrane|GO:0031976,plastid thylakoid|GO:0031975,envelope|GO:0043229,intracellular organelle|GO:0009579,thylakoid|GO:0043227,membrane-bounded organelle|GO:0043226,organelle|GO:0031224,intrinsic component of membrane|GO:0009535,chloroplast thylakoid membrane|GO:0009534,chloroplast thylakoid|GO:0031984,organelle subcompartment|GO:00095…	GO:0043169,cation binding|GO:0016168,chlorophyll binding|GO:0046906,tetrapyrrole binding|GO:0097159,organic cyclic compound binding|GO:0043167,ion binding|GO:0005488,binding|GO:0046872,metal ion binding|GO:1901363,heterocyclic compound binding	ath01100,Metabolic pathways|ath00196,Photosynthesis - antenna proteins	http://www.uniprot.org/uniprot/Q9SHR7	FALSE
1391	2	2	6.9	gi|224134873	hypothetical protein POPTR_0015s12900g [Populus trichocarpa]	2	Populus trichocarpa	0.3162	0.2107	0.5702	0.393	0.2831	0.1932	0.5105	0.34	0.42	52.03	7e-86	Q9FHB8	At5g52420		GO:0005737,cytoplasm|GO:0005783,endoplasmic reticulum|GO:0044464,cell part|GO:0043229,intracellular organelle|GO:0005623,cell|GO:0005622,intracellular|GO:0044444,cytoplasmic part|GO:0012505,endomembrane system|GO:0044424,intracellular part|GO:0043227,membrane-bounded organelle|GO:0043226,organelle|GO:0043231,intracellular membrane-bounded organelle			http://www.uniprot.org/uniprot/Q9FHB8	FALSE
375	7.26	7.38	37.8	gi|224140409	chlorophyll a/b binding protein CP29 [Populus trichocarpa]	18	Populus trichocarpa	0.16	0.0427	0.3133	0.0597	0.1445	0.0472	0.2831	0.0784	0.225225	84.31	2e-159	Q9XF88	LHCB4.2	GO:0019220,regulation of phosphate metabolic process|GO:0080090,regulation of primary metabolic process|GO:0019222,regulation of metabolic process|GO:0051049,regulation of transport|GO:0044281,small molecule metabolic process|GO:0044283,small molecule biosynthetic process|GO:0015979,photosynthesis|GO:1901360,organic cyclic compound metabolic process|GO:0044710,single-organism metabolic process|GO…	GO:0055035,plastid thylakoid membrane|GO:0034357,photosynthetic membrane|GO:0031976,plastid thylakoid|GO:0031975,envelope|GO:0043229,intracellular organelle|GO:0009579,thylakoid|GO:0043227,membrane-bounded organelle|GO:0043226,organelle|GO:0031224,intrinsic component of membrane|GO:0009535,chloroplast thylakoid membrane|GO:0009534,chloroplast thylakoid|GO:0031984,organelle subcompartment|GO:00160…	GO:0043169,cation binding|GO:0016168,chlorophyll binding|GO:0046906,tetrapyrrole binding|GO:0097159,organic cyclic compound binding|GO:0043167,ion binding|GO:0005488,binding|GO:0046872,metal ion binding|GO:1901363,heterocyclic compound binding	ath01100,Metabolic pathways|ath00196,Photosynthesis - antenna proteins	http://www.uniprot.org/uniprot/Q9XF88	FALSE
413	6.47	6.5	7.9	gi|566151722	hypothetical protein POPTR_0001s29700g [Populus trichocarpa]	5	Populus trichocarpa	0.1086	0.3877	0.4325	0.5063	0.1644	0.379	0.6252	0.4928	0.332675	86.11	0	Q9LMU1	EGY3	GO:0006457,protein folding|GO:0009314,response to radiation|GO:0000302,response to reactive oxygen species|GO:0009416,response to light stimulus|GO:0042221,response to chemical|GO:0044267,cellular protein metabolic process|GO:0010035,response to inorganic substance|GO:0044260,cellular macromolecule metabolic process|GO:0009642,response to light intensity|GO:0071704,organic substance metabolic pro…	GO:0031975,envelope|GO:0043229,intracellular organelle|GO:0042170,plastid membrane|GO:0043227,membrane-bounded organelle|GO:0043226,organelle|GO:0031224,intrinsic component of membrane|GO:0005737,cytoplasm|GO:0009941,chloroplast envelope|GO:0009536,plastid|GO:0031090,organelle membrane|GO:0016021,integral component of membrane|GO:0016020,membrane|GO:0044435,plastid part|GO:0044434,chloroplast par…	GO:0016787,hydrolase activity|GO:0003824,catalytic activity|GO:0070011,peptidase activity, acting on L-amino acid peptides|GO:0008233,peptidase activity|GO:0008237,metallopeptidase activity		http://www.uniprot.org/uniprot/Q9LMU1	FALSE
524	5.25	5.33	15.7	gi|566152589	naphthoate synthase family protein [Populus trichocarpa]	4	Populus trichocarpa	0.4246	0.1919	0.2655	0.0844	0.7244	0.8742	0.4613	0.2819	0.46895	79.17	0	Q8GYN9	MENB	GO:0006732,coenzyme metabolic process|GO:0009234,menaquinone biosynthetic process|GO:0009233,menaquinone metabolic process|GO:0044249,cellular biosynthetic process|GO:0009108,coenzyme biosynthetic process|GO:1901661,quinone metabolic process|GO:0044283,small molecule biosynthetic process|GO:0044699,single-organism process|GO:1901576,organic substance biosynthetic process|GO:0044710,single-organis…	GO:0005737,cytoplasm|GO:0043231,intracellular membrane-bounded organelle|GO:0044464,cell part|GO:0005777,peroxisome|GO:0044444,cytoplasmic part|GO:0005623,cell|GO:0005622,intracellular|GO:0042579,microbody|GO:0043229,intracellular organelle|GO:0044424,intracellular part|GO:0043227,membrane-bounded organelle|GO:0043226,organelle	GO:0008935,1,4-dihydroxy-2-naphthoyl-CoA synthase activity|GO:0016853,isomerase activity|GO:0016829,lyase activity|GO:0016830,carbon-carbon lyase activity|GO:0016833,oxo-acid-lyase activity|GO:0003824,catalytic activity	ath01110,Biosynthesis of secondary metabolites|ath00130,Ubiquinone and other terpenoid-quinone biosynthesis|ath01100,Metabolic pathways	http://www.uniprot.org/uniprot/Q8GYN9	FALSE
422	6.27	8.66	58.9	gi|566154166	LIGHT-HARVESTING CHLOROPHYLL BINDING protein 3 [Populus trichocarpa]	29	Populus trichocarpa	0.1675	0.4279	0.4169	0.522	0.1941	0.5577	0.4446	0.6997	0.305775	87.45	1e-171	Q9S7M0	LHCB3*1	GO:0044267,cellular protein metabolic process|GO:0044260,cellular macromolecule metabolic process|GO:0044238,primary metabolic process|GO:0019538,protein metabolic process|GO:0044237,cellular metabolic process|GO:0019684,photosynthesis, light reaction|GO:0009987,cellular process|GO:0006464,cellular protein modification process|GO:0015979,photosynthesis|GO:0071704,organic substance metabolic proce…	GO:0055035,plastid thylakoid membrane|GO:0034357,photosynthetic membrane|GO:0031976,plastid thylakoid|GO:0043229,intracellular organelle|GO:0005622,intracellular|GO:0043227,membrane-bounded organelle|GO:0043226,organelle|GO:0031224,intrinsic component of membrane|GO:0009535,chloroplast thylakoid membrane|GO:0009534,chloroplast thylakoid|GO:0031984,organelle subcompartment|GO:0016021,integral comp…	GO:0043169,cation binding|GO:0016168,chlorophyll binding|GO:0046906,tetrapyrrole binding|GO:0097159,organic cyclic compound binding|GO:0005198,structural molecule activity|GO:0043167,ion binding|GO:0005488,binding|GO:0046872,metal ion binding|GO:1901363,heterocyclic compound binding	ath01100,Metabolic pathways|ath00196,Photosynthesis - antenna proteins	http://www.uniprot.org/uniprot/Q9S7M0	FALSE
1281	2	2	43.4	gi|566157874	hypothetical protein POPTR_0002s13670g [Populus trichocarpa]	1	Populus trichocarpa	0.1459	0.4064	0.2754	0.447	0.2168	0.5675	0.4246	0.6366	0.265675	80.41	2e-51	Q9M1C2	T2O9.190	GO:0044267,cellular protein metabolic process|GO:0006457,protein folding|GO:0044260,cellular macromolecule metabolic process|GO:0044238,primary metabolic process|GO:0019538,protein metabolic process|GO:0009987,cellular process|GO:0044237,cellular metabolic process|GO:0043170,macromolecule metabolic process|GO:0071704,organic substance metabolic process|GO:0008152,metabolic process	GO:0005737,cytoplasm|GO:0044464,cell part|GO:0005623,cell|GO:0005622,intracellular|GO:0044424,intracellular part			http://www.uniprot.org/uniprot/Q9M1C2	FALSE
3	67.56	67.55	66.9	gi|566158833	hypothetical protein POPTR_0002s19010g [Populus trichocarpa]	238	Populus trichocarpa	0.0525	0.1409	0.0817	0.3454	0.0738	0.1198	0.1159	0.2787	0.080975	83.9	3e-160	Q39142	Lhb1B1	GO:0044267,cellular protein metabolic process|GO:0044260,cellular macromolecule metabolic process|GO:0044238,primary metabolic process|GO:0019538,protein metabolic process|GO:0044237,cellular metabolic process|GO:0019684,photosynthesis, light reaction|GO:0009987,cellular process|GO:0006464,cellular protein modification process|GO:0015979,photosynthesis|GO:0071704,organic substance metabolic proce…	GO:0055035,plastid thylakoid membrane|GO:0034357,photosynthetic membrane|GO:0031976,plastid thylakoid|GO:0031975,envelope|GO:0043229,intracellular organelle|GO:0009579,thylakoid|GO:0043227,membrane-bounded organelle|GO:0043226,organelle|GO:0031224,intrinsic component of membrane|GO:0009535,chloroplast thylakoid membrane|GO:0009534,chloroplast thylakoid|GO:0031984,organelle subcompartment|GO:00095…	GO:0043169,cation binding|GO:0016168,chlorophyll binding|GO:0046906,tetrapyrrole binding|GO:0097159,organic cyclic compound binding|GO:0043167,ion binding|GO:0005488,binding|GO:0046872,metal ion binding|GO:1901363,heterocyclic compound binding	ath01100,Metabolic pathways|ath00196,Photosynthesis - antenna proteins	http://www.uniprot.org/uniprot/Q39142	FALSE
220	10.74	10.8	27.5	gi|566160463	hypothetical protein POPTR_0003s02420g [Populus trichocarpa]	11	Populus trichocarpa	0.2911	0.1109	0.4246	0.1534	0.3532	0.2972	0.5012	0.4041	0.392525	72.35	0	Q9M8L6	T21F11.27		GO:0043229,intracellular organelle|GO:0043228,non-membrane-bounded organelle|GO:0042646,plastid nucleoid|GO:0000229,cytoplasmic chromosome|GO:0043227,membrane-bounded organelle|GO:0009295,nucleoid|GO:0005737,cytoplasm|GO:0009536,plastid|GO:0009532,plastid stroma|GO:0009570,chloroplast stroma|GO:0043226,organelle|GO:0044435,plastid part|GO:0044434,chloroplast part|GO:0005694,chromosome|GO:0009508,…			http://www.uniprot.org/uniprot/Q9M8L6	FALSE
620	4.14	9.85	44	gi|566165056	hypothetical protein POPTR_0004s05340g [Populus trichocarpa]	23	Populus trichocarpa	0.2377	0.2829	0.3221	0.2542	0.2291	0.1875	0.3467	0.1706	0.2839	84.29	0	Q9ZP06	At1g53240	GO:0009167,purine ribonucleoside monophosphate metabolic process|GO:0044281,small molecule metabolic process|GO:0009161,ribonucleoside monophosphate metabolic process|GO:0072350,tricarboxylic acid metabolic process|GO:0071840,cellular component organization or biogenesis|GO:0044712,single-organism catabolic process|GO:0044710,single-organism metabolic process|GO:0044711,single-organism biosynthet…	GO:0031974,membrane-enclosed lumen|GO:0048046,apoplast|GO:0043229,intracellular organelle|GO:0071944,cell periphery|GO:0043227,membrane-bounded organelle|GO:0043226,organelle|GO:0005737,cytoplasm|GO:0009536,plastid|GO:0005618,cell wall|GO:0005739,mitochondrion|GO:0005759,mitochondrial matrix|GO:0005794,Golgi apparatus|GO:0030312,external encapsulating structure|GO:0012505,endomembrane system|GO:0…	GO:0043169,cation binding|GO:0046872,metal ion binding|GO:0016614,oxidoreductase activity, acting on CH-OH group of donors|GO:0016615,malate dehydrogenase activity|GO:0016616,oxidoreductase activity, acting on the CH-OH group of donors, NAD or NADP as acceptor|GO:0043167,ion binding|GO:0046914,transition metal ion binding|GO:0003824,catalytic activity|GO:0030060,L-malate dehydrogenase activity|GO…	ath00630,Glyoxylate and dicarboxylate metabolism|ath00620,Pyruvate metabolism|ath00020,Citrate cycle (TCA cycle)|ath00270,Cysteine and methionine metabolism|ath00710,Carbon fixation in photosynthetic organisms|ath01200,Carbon metabolism|ath01110,Biosynthesis of secondary metabolites|ath01100,Metabolic pathways	http://www.uniprot.org/uniprot/Q9ZP06	FALSE
483	5.84	10.24	40.3	gi|566167461	17.6 kDa class I small heat shock family protein [Populus trichocarpa]	16	Populus trichocarpa	0.2466	0.0454	0.2443	0.0405	0.4875	0.0394	0.4325	0.0521	0.352725	77.36	2e-74	Q9ZW31	HSP17.6B	GO:0006457,protein folding|GO:0009314,response to radiation|GO:0000302,response to reactive oxygen species|GO:0009416,response to light stimulus|GO:0042221,response to chemical|GO:0044267,cellular protein metabolic process|GO:0051716,cellular response to stimulus|GO:0010035,response to inorganic substance|GO:0044260,cellular macromolecule metabolic process|GO:0006979,response to oxidative stress|…	GO:0005737,cytoplasm|GO:0044464,cell part|GO:0005623,cell|GO:0005622,intracellular|GO:0044424,intracellular part		ath04141,Protein processing in endoplasmic reticulum	http://www.uniprot.org/uniprot/Q9ZW31	FALSE
292	8.71	8.74	43.3	gi|566168071	Superoxide dismutase family protein [Populus trichocarpa]	15	Populus trichocarpa	0.0802	0.076	0.1282	0.0966	0.0787	0.0974	0.1148	0.1274	0.100475	74.3	2e-88	O78310	CSD2	GO:0019222,regulation of metabolic process|GO:0044712,single-organism catabolic process|GO:0044710,single-organism metabolic process|GO:0010605,negative regulation of macromolecule metabolic process|GO:0010608,posttranscriptional regulation of gene expression|GO:0040029,regulation of gene expression, epigenetic|GO:0009642,response to light intensity|GO:0016458,gene silencing|GO:0048519,negative r…	GO:0048046,apoplast|GO:0043229,intracellular organelle|GO:0043227,membrane-bounded organelle|GO:0043226,organelle|GO:0009579,thylakoid|GO:0044446,intracellular organelle part|GO:0009536,plastid|GO:0009532,plastid stroma|GO:0009570,chloroplast stroma|GO:0044435,plastid part|GO:0044434,chloroplast part|GO:0005737,cytoplasm|GO:0009507,chloroplast|GO:0043231,intracellular membrane-bounded organelle|G…	GO:0005488,binding|GO:0016721,oxidoreductase activity, acting on superoxide radicals as acceptor|GO:0046872,metal ion binding|GO:0046914,transition metal ion binding|GO:0043169,cation binding|GO:0016209,antioxidant activity|GO:0043167,ion binding|GO:0003824,catalytic activity|GO:0008270,zinc ion binding|GO:0004784,superoxide dismutase activity|GO:0005507,copper ion binding|GO:0016491,oxidoreducta…	ath04146,Peroxisome	http://www.uniprot.org/uniprot/O78310	FALSE
196	11.31	11.39	43.6	gi|566175391	18.2 kDa class I heat shock family protein [Populus trichocarpa]	8	Populus trichocarpa	0.0433	0.1621	0.1236	0.1312	0.0483	0.1826	0.1271	0.1646	0.085575	62.41	4e-46	P19037	HSP18.1	GO:0006457,protein folding|GO:0009314,response to radiation|GO:0000302,response to reactive oxygen species|GO:0009416,response to light stimulus|GO:0042221,response to chemical|GO:0044267,cellular protein metabolic process|GO:0010035,response to inorganic substance|GO:0044260,cellular macromolecule metabolic process|GO:0009642,response to light intensity|GO:0071704,organic substance metabolic pro…	GO:0005737,cytoplasm|GO:0044464,cell part|GO:0005623,cell|GO:0005622,intracellular|GO:0044424,intracellular part		ath04141,Protein processing in endoplasmic reticulum	http://www.uniprot.org/uniprot/P19037	FALSE
180	12.02	12.1	55.9	gi|566176289	peroxiredoxin Q family protein [Populus trichocarpa]	25	Populus trichocarpa	0.6138	0.9142	0.5152	0.5371	0.413	0.7745	0.3105	0.4448	0.463125	77.6	1e-97	Q9LU86	PRXQ	GO:0008152,metabolic process|GO:0044710,single-organism metabolic process|GO:0044699,single-organism process|GO:0055114,oxidation-reduction process	GO:0031978,plastid thylakoid lumen|GO:0031976,plastid thylakoid|GO:0031977,thylakoid lumen|GO:0043229,intracellular organelle|GO:0005622,intracellular|GO:0043227,membrane-bounded organelle|GO:0043226,organelle|GO:0009579,thylakoid|GO:0009534,chloroplast thylakoid|GO:0031984,organelle subcompartment|GO:0009532,plastid stroma|GO:0009570,chloroplast stroma|GO:0044436,thylakoid part|GO:0044435,plasti…	GO:0016209,antioxidant activity|GO:0051920,peroxiredoxin activity|GO:0003824,catalytic activity|GO:0005488,binding|GO:0005515,protein binding|GO:0016684,oxidoreductase activity, acting on peroxide as acceptor|GO:0004601,peroxidase activity|GO:0016491,oxidoreductase activity		http://www.uniprot.org/uniprot/Q9LU86	FALSE
119	15.12	15.18	30.7	gi|566177654	hypothetical protein POPTR_0006s22810g [Populus trichocarpa]	14	Populus trichocarpa	0.3467	0.4249	0.4875	0.623	0.3404	0.2805	0.4446	0.3696	0.4048	80.26	0	P37107	FFC	GO:0008104,protein localization|GO:0019222,regulation of metabolic process|GO:0030422,production of siRNA involved in RNA interference|GO:0031050,dsRNA fragmentation|GO:0044281,small molecule metabolic process|GO:1901360,organic cyclic compound metabolic process|GO:0044710,single-organism metabolic process|GO:0044711,single-organism biosynthetic process|GO:0010605,negative regulation of macromole…	GO:0005786,signal recognition particle, endoplasmic reticulum targeting|GO:0043229,intracellular organelle|GO:0043227,membrane-bounded organelle|GO:0043226,organelle|GO:0005737,cytoplasm|GO:0009536,plastid|GO:0009532,plastid stroma|GO:0009570,chloroplast stroma|GO:0030529,ribonucleoprotein complex|GO:0044435,plastid part|GO:0044434,chloroplast part|GO:0080085,signal recognition particle, chloropl…	GO:0035639,purine ribonucleoside triphosphate binding|GO:0008312,7S RNA binding|GO:0005488,binding|GO:0003676,nucleic acid binding|GO:0043167,ion binding|GO:1901363,heterocyclic compound binding|GO:0001883,purine nucleoside binding|GO:0001882,nucleoside binding|GO:0043168,anion binding|GO:0016462,pyrophosphatase activity|GO:0000166,nucleotide binding|GO:0032561,guanyl ribonucleotide binding|GO:19…	ath03060,Protein export	http://www.uniprot.org/uniprot/P37107	FALSE
63	21.04	21.06	57.4	gi|566180148	hypothetical protein POPTR_0007s07780g [Populus trichocarpa]	33	Populus trichocarpa	0.3311	0.0575	0.492	0.0728	0.3664	0.0703	0.5058	0.0889	0.423825	29.09	0.72	Q9SFB8	PIP5K6	GO:0048589,developmental growth|GO:0048588,developmental cell growth|GO:0048468,cell development|GO:1901576,organic substance biosynthetic process|GO:0071840,cellular component organization or biogenesis|GO:0044710,single-organism metabolic process|GO:0071704,organic substance metabolic process|GO:0048868,pollen tube development|GO:0048869,cellular developmental process|GO:0030048,actin filament-…	GO:0098590,plasma membrane region|GO:0045177,apical part of cell|GO:0016020,membrane|GO:0016324,apical plasma membrane|GO:0098805,whole membrane|GO:0098589,membrane region|GO:0044464,cell part|GO:0005623,cell|GO:0071944,cell periphery|GO:0005886,plasma membrane|GO:0044425,membrane part|GO:0042995,cell projection|GO:0044459,plasma membrane part|GO:0090406,pollen tube	GO:0035639,purine ribonucleoside triphosphate binding|GO:0005488,binding|GO:0043167,ion binding|GO:1901363,heterocyclic compound binding|GO:0001883,purine nucleoside binding|GO:0001882,nucleoside binding|GO:0043168,anion binding|GO:0000166,nucleotide binding|GO:0016740,transferase activity|GO:1901265,nucleoside phosphate binding|GO:0032549,ribonucleoside binding|GO:0017076,purine nucleotide bindi…	ath00562,Inositol phosphate metabolism|ath04070,Phosphatidylinositol signaling system|ath01100,Metabolic pathways|ath04144,Endocytosis	http://www.uniprot.org/uniprot/Q9SFB8	FALSE
1499	1.6	1.86	20.8	gi|566186111	hypothetical protein POPTR_0009s03520g, partial [Populus trichocarpa]	3	Populus trichocarpa	0.2032	0.3465	0.0982	0.3345	0.1343	0.3651	0.0879	0.352	0.1309	50.81	2e-28	P13853	HSP17.6C	GO:0006457,protein folding|GO:0009314,response to radiation|GO:0000302,response to reactive oxygen species|GO:0009416,response to light stimulus|GO:0042221,response to chemical|GO:0044267,cellular protein metabolic process|GO:0051716,cellular response to stimulus|GO:0010035,response to inorganic substance|GO:0044260,cellular macromolecule metabolic process|GO:0006979,response to oxidative stress|…	GO:0005737,cytoplasm|GO:0044464,cell part|GO:0005623,cell|GO:0005622,intracellular|GO:0044424,intracellular part		ath04141,Protein processing in endoplasmic reticulum	http://www.uniprot.org/uniprot/P13853	FALSE
223	10.66	10.73	24.3	gi|566187985	hypothetical protein POPTR_0009s14500g [Populus trichocarpa]	7	Populus trichocarpa	0.4325	0.0248	0.4966	0.0537	0.4656	0.0388	0.5346	0.0859	0.482325	22.32	5e-11	Q1H537	DVR	GO:0080090,regulation of primary metabolic process|GO:0019222,regulation of metabolic process|GO:0019682,glyceraldehyde-3-phosphate metabolic process|GO:0006778,porphyrin-containing compound metabolic process|GO:0006779,porphyrin-containing compound biosynthetic process|GO:0044281,small molecule metabolic process|GO:0044283,small molecule biosynthetic process|GO:1901362,organic cyclic compound bi…	GO:0031976,plastid thylakoid|GO:0031975,envelope|GO:0043229,intracellular organelle|GO:0043227,membrane-bounded organelle|GO:0043226,organelle|GO:0005737,cytoplasm|GO:0009534,chloroplast thylakoid|GO:0031984,organelle subcompartment|GO:0016020,membrane|GO:0044435,plastid part|GO:0044434,chloroplast part|GO:0009579,thylakoid|GO:0009941,chloroplast envelope|GO:0031967,organelle envelope|GO:0009536,…	GO:0016628,oxidoreductase activity, acting on the CH-CH group of donors, NAD or NADP as acceptor|GO:0016627,oxidoreductase activity, acting on the CH-CH group of donors|GO:0033728,divinyl chlorophyllide a 8-vinyl-reductase activity|GO:0003824,catalytic activity|GO:0051744,3,8-divinyl protochlorophyllide a 8-vinyl reductase activity|GO:0016491,oxidoreductase activity	ath00860,Porphyrin and chlorophyll metabolism|ath01110,Biosynthesis of secondary metabolites|ath01100,Metabolic pathways	http://www.uniprot.org/uniprot/Q1H537	FALSE
386	6.94	7	24.2	gi|566189392	hypothetical protein POPTR_0010s06320g [Populus trichocarpa]	15	Populus trichocarpa	0.4406	0.0585	0.2704	0.2499	0.3837	0.0323	0.2208	0.2051	0.328875	42.37	2e-40	P31170	HSP25.3	GO:0006457,protein folding|GO:0009314,response to radiation|GO:0000302,response to reactive oxygen species|GO:0009416,response to light stimulus|GO:0042221,response to chemical|GO:0044267,cellular protein metabolic process|GO:0010035,response to inorganic substance|GO:0044260,cellular macromolecule metabolic process|GO:0009642,response to light intensity|GO:0071704,organic substance metabolic pro…	GO:0005737,cytoplasm|GO:0009536,plastid|GO:0043231,intracellular membrane-bounded organelle|GO:0044464,cell part|GO:0044444,cytoplasmic part|GO:0005623,cell|GO:0005622,intracellular|GO:0043229,intracellular organelle|GO:0044424,intracellular part|GO:0043227,membrane-bounded organelle|GO:0043226,organelle|GO:0009507,chloroplast		ath04141,Protein processing in endoplasmic reticulum	http://www.uniprot.org/uniprot/P31170	FALSE
1127	2.01	2.02	4.3	gi|566191830	cucumisin family protein [Populus trichocarpa]	3	Populus trichocarpa	0.2965	0.1997	0.863	0.7867	0.2014	0.1532	0.5861	0.4079	0.48675	49.42	0	Q9FGU3	At5g59100	GO:0044238,primary metabolic process|GO:0019538,protein metabolic process|GO:0043170,macromolecule metabolic process|GO:0071704,organic substance metabolic process|GO:0008152,metabolic process|GO:0006508,proteolysis		GO:0004252,serine-type endopeptidase activity|GO:0004175,endopeptidase activity|GO:0017171,serine hydrolase activity|GO:0016787,hydrolase activity|GO:0003824,catalytic activity|GO:0070011,peptidase activity, acting on L-amino acid peptides|GO:0008233,peptidase activity|GO:0008236,serine-type peptidase activity		http://www.uniprot.org/uniprot/Q9FGU3	FALSE
24	35.48	35.5	63	gi|566191899	hypothetical protein POPTR_0010s20810g [Populus trichocarpa]	110	Populus trichocarpa	0.0973	0.2484	0.1514	0.2858	0.0991	0.2644	0.1514	0.3068	0.1248	26.15	5e-07	Q9SEI3	RPT4A	GO:0080090,regulation of primary metabolic process|GO:0019222,regulation of metabolic process|GO:1901362,organic cyclic compound biosynthetic process|GO:0071840,cellular component organization or biogenesis|GO:0044712,single-organism catabolic process|GO:0044710,single-organism metabolic process|GO:0010604,positive regulation of macromolecule metabolic process|GO:0048518,positive regulation of bi…	GO:0031974,membrane-enclosed lumen|GO:0031595,nuclear proteasome complex|GO:0043229,intracellular organelle|GO:0031597,cytosolic proteasome complex|GO:0043227,membrane-bounded organelle|GO:0043226,organelle|GO:0005737,cytoplasm|GO:0031981,nuclear lumen|GO:0005618,cell wall|GO:0005634,nucleus|GO:0071944,cell periphery|GO:0030312,external encapsulating structure|GO:0000502,proteasome complex|GO:004…	GO:0036402,proteasome-activating ATPase activity|GO:0035639,purine ribonucleoside triphosphate binding|GO:0017025,TBP-class protein binding|GO:0005488,binding|GO:0016887,ATPase activity|GO:0043167,ion binding|GO:1901363,heterocyclic compound binding|GO:1901265,nucleoside phosphate binding|GO:0001882,nucleoside binding|GO:0043168,anion binding|GO:0042623,ATPase activity, coupled|GO:0000166,nucleot…	ath03050,Proteasome	http://www.uniprot.org/uniprot/Q9SEI3	FALSE
61	21.77	21.78	54	gi|566194352	hypothetical protein POPTR_0011s07720g [Populus trichocarpa]	13	Populus trichocarpa	0.1722	0.0082	0.1675	0.0209	0.1472	0.0033	0.1318	0.014	0.154675	88.34	0	Q5XF33	CHLI2	GO:0006778,porphyrin-containing compound metabolic process|GO:0006779,porphyrin-containing compound biosynthetic process|GO:0044281,small molecule metabolic process|GO:1901362,organic cyclic compound biosynthetic process|GO:0015979,photosynthesis|GO:1901360,organic cyclic compound metabolic process|GO:0044710,single-organism metabolic process|GO:0044711,single-organism biosynthetic process|GO:004…	GO:0010007,magnesium chelatase complex|GO:0043229,intracellular organelle|GO:0043227,membrane-bounded organelle|GO:0043226,organelle|GO:0005737,cytoplasm|GO:0009536,plastid|GO:0009532,plastid stroma|GO:0009570,chloroplast stroma|GO:0044435,plastid part|GO:0044434,chloroplast part|GO:1902494,catalytic complex|GO:0009507,chloroplast|GO:0043234,protein complex|GO:0032991,macromolecular complex|GO:00…	GO:0016887,ATPase activity|GO:0035639,purine ribonucleoside triphosphate binding|GO:0005488,binding|GO:0051002,ligase activity, forming nitrogen-metal bonds|GO:0051003,ligase activity, forming nitrogen-metal bonds, forming coordination complexes|GO:0043167,ion binding|GO:1901363,heterocyclic compound binding|GO:0001883,purine nucleoside binding|GO:0001882,nucleoside binding|GO:0043168,anion bindi…	ath00860,Porphyrin and chlorophyll metabolism|ath01110,Biosynthesis of secondary metabolites|ath01100,Metabolic pathways	http://www.uniprot.org/uniprot/Q5XF33	FALSE
643	4.05	14.3	49	gi|566195366	hypothetical protein POPTR_0011s13820g [Populus trichocarpa]	35	Populus trichocarpa	0.7727	0.3259	0.3698	0.1931	0.1754	0.199	0.1086	0.1389	0.356625	77.55	0	Q38814	THI1	GO:0006772,thiamine metabolic process|GO:0019222,regulation of metabolic process|GO:0051049,regulation of transport|GO:0044281,small molecule metabolic process|GO:0044283,small molecule biosynthetic process|GO:1901362,organic cyclic compound biosynthetic process|GO:1901360,organic cyclic compound metabolic process|GO:0051716,cellular response to stimulus|GO:0044711,single-organism biosynthetic pr…	GO:0031975,envelope|GO:0043229,intracellular organelle|GO:0043227,membrane-bounded organelle|GO:0043226,organelle|GO:0005737,cytoplasm|GO:0009941,chloroplast envelope|GO:0009536,plastid|GO:0009532,plastid stroma|GO:0009570,chloroplast stroma|GO:0010319,stromule|GO:0005739,mitochondrion|GO:0044435,plastid part|GO:0044434,chloroplast part|GO:0009579,thylakoid|GO:0031967,organelle envelope|GO:000950…	GO:0005488,binding|GO:0043169,cation binding|GO:0046914,transition metal ion binding|GO:0043167,ion binding|GO:0008270,zinc ion binding|GO:0005515,protein binding|GO:0046983,protein dimerization activity|GO:0046872,metal ion binding|GO:0042802,identical protein binding|GO:0042803,protein homodimerization activity	ath00730,Thiamine metabolism|ath01100,Metabolic pathways	http://www.uniprot.org/uniprot/Q38814	FALSE
1046	2.04	2.05	11.5	gi|566197745	hypothetical protein POPTR_0012s10140g [Populus trichocarpa]	1	Populus trichocarpa	0.3281	0.5919	0.2938	0.4041	0.3597	0.7897	0.3467	0.5148	0.332075	73.84	0	Q0WLC7	CBSCBSPB4		GO:0044425,membrane part|GO:0016021,integral component of membrane|GO:0016020,membrane|GO:0031224,intrinsic component of membrane			http://www.uniprot.org/uniprot/Q0WLC7	FALSE
1071	2.02	2.08	19.6	gi|566197949	hypothetical protein POPTR_0012s11410g [Populus trichocarpa]	2	Populus trichocarpa	0.5702	0.5545	0.2355	0.4102	0.7047	0.6894	0.2992	0.4937	0.4524	30.43	0.15	Q9FGT7	ARR18	GO:0080090,regulation of primary metabolic process|GO:0019222,regulation of metabolic process|GO:0031326,regulation of cellular biosynthetic process|GO:0031323,regulation of cellular metabolic process|GO:0090304,nucleic acid metabolic process|GO:0044249,cellular biosynthetic process|GO:0034641,cellular nitrogen compound metabolic process|GO:0006807,nitrogen compound metabolic process|GO:0023052,s…	GO:0043231,intracellular membrane-bounded organelle|GO:0005634,nucleus|GO:0044464,cell part|GO:0005623,cell|GO:0005622,intracellular|GO:0043229,intracellular organelle|GO:0044424,intracellular part|GO:0043227,membrane-bounded organelle|GO:0043226,organelle	GO:0097159,organic cyclic compound binding|GO:0005488,binding|GO:0003676,nucleic acid binding|GO:0003677,DNA binding|GO:1901363,heterocyclic compound binding	ath04075,Plant hormone signal transduction	http://www.uniprot.org/uniprot/Q9FGT7	FALSE
612	4.18	4.21	23.7	gi|566199843	hypothetical protein POPTR_0013s06710g [Populus trichocarpa]	6	Populus trichocarpa	0.2831	0.611	0.3945	0.6343	0.3048	0.5215	0.413	0.54	0.34885	84	4e-127	Q9SKX4	RPL3A	GO:0008104,protein localization|GO:0006778,porphyrin-containing compound metabolic process|GO:0006779,porphyrin-containing compound biosynthetic process|GO:0044281,small molecule metabolic process|GO:1901362,organic cyclic compound biosynthetic process|GO:0015979,photosynthesis|GO:0045036,protein targeting to chloroplast|GO:0044710,single-organism metabolic process|GO:0044711,single-organism bios…	GO:0031975,envelope|GO:0043229,intracellular organelle|GO:0043228,non-membrane-bounded organelle|GO:0043227,membrane-bounded organelle|GO:0043226,organelle|GO:0005737,cytoplasm|GO:0009941,chloroplast envelope|GO:0009536,plastid|GO:0009532,plastid stroma|GO:0009570,chloroplast stroma|GO:0016020,membrane|GO:0030529,ribonucleoprotein complex|GO:0044435,plastid part|GO:0044434,chloroplast part|GO:000…	GO:0097159,organic cyclic compound binding|GO:0019843,rRNA binding|GO:0003735,structural constituent of ribosome|GO:0003723,RNA binding|GO:0003676,nucleic acid binding|GO:0005198,structural molecule activity|GO:1901363,heterocyclic compound binding|GO:0005488,binding	ath03010,Ribosome	http://www.uniprot.org/uniprot/Q9SKX4	FALSE
1441	2	2	14.6	gi|566201513	hypothetical protein POPTR_0013s15570g, partial [Populus trichocarpa]	2	Populus trichocarpa	0.1368	0.3163	0.3981	0.4336	0.2051	0.3378	0.7586	0.4714	0.37465	83.93	3e-30	Q9SG91	T7M13.6	GO:1902600,hydrogen ion transmembrane transport|GO:0044249,cellular biosynthetic process|GO:0006091,generation of precursor metabolites and energy|GO:0044699,single-organism process|GO:0044710,single-organism metabolic process|GO:0015992,proton transport|GO:0055114,oxidation-reduction process|GO:0051179,localization|GO:0022900,electron transport chain|GO:0098662,inorganic cation transmembrane tra…	GO:0044464,cell part|GO:1990204,oxidoreductase complex|GO:0043229,intracellular organelle|GO:0070069,cytochrome complex|GO:0043227,membrane-bounded organelle|GO:0043226,organelle|GO:0031224,intrinsic component of membrane|GO:0005737,cytoplasm|GO:0031090,organelle membrane|GO:0098796,membrane protein complex|GO:0016021,integral component of membrane|GO:0016020,membrane|GO:0098803,respiratory chain…	GO:0022891,substrate-specific transmembrane transporter activity|GO:0022890,inorganic cation transmembrane transporter activity|GO:0022892,substrate-specific transporter activity|GO:0005215,transporter activity|GO:0008324,cation transmembrane transporter activity|GO:0008121,ubiquinol-cytochrome-c reductase activity|GO:0022857,transmembrane transporter activity|GO:0015075,ion transmembrane transpo…		http://www.uniprot.org/uniprot/Q9SG91	FALSE
326	8.08	8.19	42.9	gi|566201546	hypothetical protein POPTR_0013s15730g [Populus trichocarpa]	8	Populus trichocarpa	0.2168	0.3712	0.4055	0.3403	0.3133	0.2574	0.6368	0.2356	0.3931	80.58	3e-120	Q9LEV3	CBSX3	GO:0009167,purine ribonucleoside monophosphate metabolic process|GO:0044281,small molecule metabolic process|GO:0009161,ribonucleoside monophosphate metabolic process|GO:1901360,organic cyclic compound metabolic process|GO:0044712,single-organism catabolic process|GO:0044710,single-organism metabolic process|GO:0010035,response to inorganic substance|GO:0010256,endomembrane system organization|GO…	GO:0005737,cytoplasm|GO:0043231,intracellular membrane-bounded organelle|GO:0044464,cell part|GO:0043229,intracellular organelle|GO:0005739,mitochondrion|GO:0005622,intracellular|GO:0044444,cytoplasmic part|GO:0005623,cell|GO:0044424,intracellular part|GO:0043227,membrane-bounded organelle|GO:0043226,organelle	GO:0043169,cation binding|GO:0046914,transition metal ion binding|GO:0050897,cobalt ion binding|GO:0043167,ion binding|GO:0005488,binding|GO:0046872,metal ion binding		http://www.uniprot.org/uniprot/Q9LEV3	FALSE
751	3.8	3.92	17.5	gi|566203118	phosphomannomutase family protein [Populus trichocarpa]	3	Populus trichocarpa	0.1459	0.1887	0.7047	0.8732	0.1486	0.1808	0.7379	0.8338	0.434275	84.96	4e-159	O80840	PMM	GO:0009298,GDP-mannose biosynthetic process|GO:0009167,purine ribonucleoside monophosphate metabolic process|GO:0009165,nucleotide biosynthetic process|GO:0007165,signal transduction|GO:0009161,ribonucleoside monophosphate metabolic process|GO:1901362,organic cyclic compound biosynthetic process|GO:0071840,cellular component organization or biogenesis|GO:0019853,L-ascorbic acid biosynthetic proce…	GO:0005737,cytoplasm|GO:0005829,cytosol|GO:0044464,cell part|GO:0005623,cell|GO:0005622,intracellular|GO:0044444,cytoplasmic part|GO:0044424,intracellular part	GO:0016853,isomerase activity|GO:0003824,catalytic activity|GO:0004615,phosphomannomutase activity|GO:0005488,binding|GO:0005515,protein binding|GO:0016868,intramolecular transferase activity, phosphotransferases|GO:0016866,intramolecular transferase activity	ath00051,Fructose and mannose metabolism|ath01110,Biosynthesis of secondary metabolites|ath00520,Amino sugar and nucleotide sugar metabolism|ath01100,Metabolic pathways	http://www.uniprot.org/uniprot/O80840	FALSE
817	3.05	22.18	34.8	gi|566206271	hypothetical protein POPTR_0015s06770g [Populus trichocarpa]	21	Populus trichocarpa	0.3281	0.3956	0.3373	0.4129	0.2421	0.2542	0.2399	0.2618	0.28685	85.78	0	P42730	CLPB1	GO:0034250,positive regulation of cellular amide metabolic process|GO:0010035,response to inorganic substance|GO:0009628,response to abiotic stimulus|GO:0006457,protein folding|GO:0080090,regulation of primary metabolic process|GO:0019222,regulation of metabolic process|GO:0009891,positive regulation of biosynthetic process|GO:0051246,regulation of protein metabolic process|GO:0031325,positive re…	GO:0031975,envelope|GO:0043229,intracellular organelle|GO:0043227,membrane-bounded organelle|GO:0043226,organelle|GO:0005737,cytoplasm|GO:0009941,chloroplast envelope|GO:0009536,plastid|GO:0009532,plastid stroma|GO:0009570,chloroplast stroma|GO:0005634,nucleus|GO:0044435,plastid part|GO:0044434,chloroplast part|GO:0031967,organelle envelope|GO:0009507,chloroplast|GO:0009526,plastid envelope|GO:00…	GO:0035639,purine ribonucleoside triphosphate binding|GO:0005488,binding|GO:0043167,ion binding|GO:1901363,heterocyclic compound binding|GO:1901265,nucleoside phosphate binding|GO:0001882,nucleoside binding|GO:0043168,anion binding|GO:0000166,nucleotide binding|GO:0001883,purine nucleoside binding|GO:0032549,ribonucleoside binding|GO:0017076,purine nucleotide binding|GO:0005524,ATP binding|GO:003…		http://www.uniprot.org/uniprot/P42730	FALSE
365	7.49	7.6	50.8	gi|566206415	hypothetical protein POPTR_0015s07340g [Populus trichocarpa]	24	Populus trichocarpa	0.2992	0.2211	0.4169	0.6585	0.2704	0.0533	0.3908	0.2155	0.344325	84.06	8e-158	P27521	LHCA4	GO:1901566,organonitrogen compound biosynthetic process|GO:0009628,response to abiotic stimulus|GO:0008152,metabolic process|GO:0050801,ion homeostasis|GO:0043412,macromolecule modification|GO:0019752,carboxylic acid metabolic process|GO:1901564,organonitrogen compound metabolic process|GO:0042592,homeostatic process|GO:0055080,cation homeostasis|GO:0006807,nitrogen compound metabolic process|GO:…	GO:0055035,plastid thylakoid membrane|GO:0034357,photosynthetic membrane|GO:0031976,plastid thylakoid|GO:0031975,envelope|GO:0043229,intracellular organelle|GO:0009579,thylakoid|GO:0043227,membrane-bounded organelle|GO:0043226,organelle|GO:0031224,intrinsic component of membrane|GO:0009535,chloroplast thylakoid membrane|GO:0009534,chloroplast thylakoid|GO:0031984,organelle subcompartment|GO:00095…	GO:0043169,cation binding|GO:0016168,chlorophyll binding|GO:0046906,tetrapyrrole binding|GO:0097159,organic cyclic compound binding|GO:0043167,ion binding|GO:0005488,binding|GO:0046872,metal ion binding|GO:1901363,heterocyclic compound binding	ath00196,Photosynthesis - antenna proteins	http://www.uniprot.org/uniprot/P27521	FALSE
696	4	6	14.7	gi|566207873	hypothetical protein POPTR_0016s00290g [Populus trichocarpa]	3	Populus trichocarpa	0.0794	0.3929	0.413	0.311	0.1675	0.7378	0.9727	0.9772	0.40815	31.71	0.48	Q9LM13	F16L1.10	GO:0009185,ribonucleoside diphosphate metabolic process|GO:0006732,coenzyme metabolic process|GO:0009141,nucleoside triphosphate metabolic process|GO:0009144,purine nucleoside triphosphate metabolic process|GO:0019752,carboxylic acid metabolic process|GO:0044723,single-organism carbohydrate metabolic process|GO:0034641,cellular nitrogen compound metabolic process|GO:0006807,nitrogen compound meta…		GO:0016853,isomerase activity|GO:0003824,catalytic activity|GO:0016868,intramolecular transferase activity, phosphotransferases|GO:0016866,intramolecular transferase activity|GO:0004619,phosphoglycerate mutase activity	ath00260,Glycine, serine and threonine metabolism|ath00010,Glycolysis / Gluconeogenesis|ath01230,Biosynthesis of amino acids|ath01200,Carbon metabolism|ath01110,Biosynthesis of secondary metabolites|ath01100,Metabolic pathways	http://www.uniprot.org/uniprot/Q9LM13	FALSE
1098	2.02	2.02	8.3	gi|566209778	hypothetical protein POPTR_0016s11621g [Populus trichocarpa]	4	Populus trichocarpa	0.2582	0.5036	0.3945	0.5087	0.3733	0.5752	0.5445	0.5814	0.392625	68.46	0	P25851	FBP	GO:0019220,regulation of phosphate metabolic process|GO:0080090,regulation of primary metabolic process|GO:0019222,regulation of metabolic process|GO:0006470,protein dephosphorylation|GO:0006778,porphyrin-containing compound metabolic process|GO:0006779,porphyrin-containing compound biosynthetic process|GO:0061024,membrane organization|GO:0015977,carbon fixation|GO:0044281,small molecule metaboli…	GO:0031975,envelope|GO:0048046,apoplast|GO:0043229,intracellular organelle|GO:0043227,membrane-bounded organelle|GO:0043226,organelle|GO:0005737,cytoplasm|GO:0009536,plastid|GO:0009532,plastid stroma|GO:0009570,chloroplast stroma|GO:0010319,stromule|GO:0044435,plastid part|GO:0044434,chloroplast part|GO:0031967,organelle envelope|GO:0009507,chloroplast|GO:0009526,plastid envelope|GO:0043231,intra…	GO:0050308,sugar-phosphatase activity|GO:0019203,carbohydrate phosphatase activity|GO:0042132,fructose 1,6-bisphosphate 1-phosphatase activity|GO:0016791,phosphatase activity|GO:0016787,hydrolase activity|GO:0043169,cation binding|GO:0016788,hydrolase activity, acting on ester bonds|GO:0043167,ion binding|GO:0042578,phosphoric ester hydrolase activity|GO:0003824,catalytic activity|GO:0005488,bind…	ath00030,Pentose phosphate pathway|ath00710,Carbon fixation in photosynthetic organisms|ath00010,Glycolysis / Gluconeogenesis|ath00051,Fructose and mannose metabolism|ath01200,Carbon metabolism|ath01110,Biosynthesis of secondary metabolites|ath01100,Metabolic pathways	http://www.uniprot.org/uniprot/P25851	FALSE
307	8.52	8.55	17.7	gi|566210740	hypothetical protein POPTR_0017s01720g [Populus trichocarpa]	10	Populus trichocarpa	0.4365	0.448	0.4656	0.4136	0.5058	0.5649	0.5297	0.523	0.4844	88.82	0	Q9FYR6	OVA6	GO:0048467,gynoecium development|GO:0019222,regulation of metabolic process|GO:0061024,membrane organization|GO:0044281,small molecule metabolic process|GO:0015979,photosynthesis|GO:0071840,cellular component organization or biogenesis|GO:0044710,single-organism metabolic process|GO:0043043,peptide biosynthetic process|GO:0048513,organ development|GO:0003006,developmental process involved in repr…	GO:0005737,cytoplasm|GO:0009536,plastid|GO:0043231,intracellular membrane-bounded organelle|GO:0009532,plastid stroma|GO:0009570,chloroplast stroma|GO:0044464,cell part|GO:0044444,cytoplasmic part|GO:0005739,mitochondrion|GO:0005622,intracellular|GO:0044446,intracellular organelle part|GO:0043229,intracellular organelle|GO:0005623,cell|GO:0044435,plastid part|GO:0044434,chloroplast part|GO:004442…	GO:0035639,purine ribonucleoside triphosphate binding|GO:0005488,binding|GO:0000166,nucleotide binding|GO:1901363,heterocyclic compound binding|GO:1901265,nucleoside phosphate binding|GO:0001882,nucleoside binding|GO:0043168,anion binding|GO:0004812,aminoacyl-tRNA ligase activity|GO:0043167,ion binding|GO:0001883,purine nucleoside binding|GO:0032549,ribonucleoside binding|GO:0017076,purine nucleo…	ath00970,Aminoacyl-tRNA biosynthesis	http://www.uniprot.org/uniprot/Q9FYR6	FALSE
417	6.43	6.47	27.6	gi|566211927	hypothetical protein POPTR_0017s07040g [Populus trichocarpa]	8	Populus trichocarpa	0.5649	0.6008	0.3733	0.8126	0.4699	0.4568	0.2831	0.2136	0.4228	78.89	0	Q9FMF1	At5g64380	GO:0016311,dephosphorylation|GO:0009451,RNA modification|GO:0090304,nucleic acid metabolic process|GO:0034641,cellular nitrogen compound metabolic process|GO:0006807,nitrogen compound metabolic process|GO:1901360,organic cyclic compound metabolic process|GO:0006139,nucleobase-containing compound metabolic process|GO:0044260,cellular macromolecule metabolic process|GO:0016556,mRNA modification|GO:…	GO:0005737,cytoplasm|GO:0009536,plastid|GO:0043231,intracellular membrane-bounded organelle|GO:0009532,plastid stroma|GO:0009570,chloroplast stroma|GO:0044464,cell part|GO:0044444,cytoplasmic part|GO:0005623,cell|GO:0005622,intracellular|GO:0044446,intracellular organelle part|GO:0043229,intracellular organelle|GO:0044435,plastid part|GO:0044434,chloroplast part|GO:0044424,intracellular part|GO:0…	GO:0050308,sugar-phosphatase activity|GO:0019203,carbohydrate phosphatase activity|GO:0042132,fructose 1,6-bisphosphate 1-phosphatase activity|GO:0016791,phosphatase activity|GO:0016787,hydrolase activity|GO:0016788,hydrolase activity, acting on ester bonds|GO:0042578,phosphoric ester hydrolase activity|GO:0003824,catalytic activity	ath00030,Pentose phosphate pathway|ath00710,Carbon fixation in photosynthetic organisms|ath00010,Glycolysis / Gluconeogenesis|ath00051,Fructose and mannose metabolism|ath01200,Carbon metabolism|ath01110,Biosynthesis of secondary metabolites|ath01100,Metabolic pathways	http://www.uniprot.org/uniprot/Q9FMF1	FALSE
47	25.94	26.01	49.7	gi|566238007	Chlorophyll a-b binding protein CP26 [Populus trichocarpa]	82	Populus trichocarpa	0.1213	0.0826	0.1148	0.0501	0.1282	0.1056	0.1159	0.0589	0.12005	85.92	8e-144	Q9XF89	LHCB5	GO:0051049,regulation of transport|GO:0044281,small molecule metabolic process|GO:0044283,small molecule biosynthetic process|GO:0015979,photosynthesis|GO:1901360,organic cyclic compound metabolic process|GO:0044710,single-organism metabolic process|GO:0044711,single-organism biosynthetic process|GO:0010033,response to organic substance|GO:0006364,rRNA processing|GO:0034470,ncRNA processing|GO:00…	GO:0055035,plastid thylakoid membrane|GO:0034357,photosynthetic membrane|GO:0031976,plastid thylakoid|GO:0043229,intracellular organelle|GO:0009517,PSII associated light-harvesting complex II|GO:0030076,light-harvesting complex|GO:0005622,intracellular|GO:0043227,membrane-bounded organelle|GO:0043226,organelle|GO:0031224,intrinsic component of membrane|GO:0009535,chloroplast thylakoid membrane|GO…	GO:0043169,cation binding|GO:0016168,chlorophyll binding|GO:0046906,tetrapyrrole binding|GO:0097159,organic cyclic compound binding|GO:0043167,ion binding|GO:0005488,binding|GO:0046872,metal ion binding|GO:1901363,heterocyclic compound binding	ath01100,Metabolic pathways|ath00196,Photosynthesis - antenna proteins	http://www.uniprot.org/uniprot/Q9XF89	FALSE
934	2.31	2.36	30.9	gi|675155239	NADH-plastoquinone oxidoreductase subunit K (chloroplast) [Populus euphratica]	7	Populus euphratica	0.2312	0.3494	0.2965	0.3253	0.2443	0.3684	0.2965	0.342	0.267125	88	1e-143	P56756	ndhK	GO:0044710,single-organism metabolic process|GO:0006810,transport|GO:0019684,photosynthesis, light reaction|GO:0009987,cellular process|GO:0044237,cellular metabolic process|GO:0051179,localization|GO:0055114,oxidation-reduction process|GO:0008152,metabolic process|GO:0006091,generation of precursor metabolites and energy|GO:0051234,establishment of localization|GO:0015979,photosynthesis|GO:00446…	GO:0055035,plastid thylakoid membrane|GO:0034357,photosynthetic membrane|GO:0031976,plastid thylakoid|GO:0043229,intracellular organelle|GO:0009579,thylakoid|GO:0043227,membrane-bounded organelle|GO:0043226,organelle|GO:0009535,chloroplast thylakoid membrane|GO:0009534,chloroplast thylakoid|GO:0031984,organelle subcompartment|GO:0016020,membrane|GO:0044436,thylakoid part|GO:0044435,plastid part|G…	GO:0005488,binding|GO:0043169,cation binding|GO:0048038,quinone binding|GO:0051539,4 iron, 4 sulfur cluster binding|GO:0046914,transition metal ion binding|GO:0003824,catalytic activity|GO:0048037,cofactor binding|GO:0008137,NADH dehydrogenase (ubiquinone) activity|GO:0051536,iron-sulfur cluster binding|GO:0043167,ion binding|GO:0016655,oxidoreductase activity, acting on NAD(P)H, quinone or simil…	ath00190,Oxidative phosphorylation|ath01100,Metabolic pathways	http://www.uniprot.org/uniprot/P56756	FALSE
2	81.43	81.36	90.8	gi|675155242	ATP synthase CF1 beta subunit (chloroplast) [Populus euphratica]	389	Populus euphratica	0.1803	0	0.2128	0	0.182	0	0.2109	0	0.1965	94.38	0	P19366	atpB	GO:0009167,purine ribonucleoside monophosphate metabolic process|GO:0009165,nucleotide biosynthetic process|GO:0009163,nucleoside biosynthetic process|GO:0009161,ribonucleoside monophosphate metabolic process|GO:1901362,organic cyclic compound biosynthetic process|GO:0042451,purine nucleoside biosynthetic process|GO:0009168,purine ribonucleoside monophosphate biosynthetic process|GO:0044710,singl…	GO:0055035,plastid thylakoid membrane|GO:0034357,photosynthetic membrane|GO:0031976,plastid thylakoid|GO:0043229,intracellular organelle|GO:0009579,thylakoid|GO:0043227,membrane-bounded organelle|GO:0043226,organelle|GO:0009535,chloroplast thylakoid membrane|GO:0009534,chloroplast thylakoid|GO:0031984,organelle subcompartment|GO:0016020,membrane|GO:0044436,thylakoid part|GO:0044435,plastid part|G…	GO:0035639,purine ribonucleoside triphosphate binding|GO:0005488,binding|GO:0016887,ATPase activity|GO:0043167,ion binding|GO:1901363,heterocyclic compound binding|GO:0032550,purine ribonucleoside binding|GO:0001882,nucleoside binding|GO:0043168,anion binding|GO:0042625,ATPase activity, coupled to transmembrane movement of ions|GO:0042626,ATPase activity, coupled to transmembrane movement of subs…	ath00190,Oxidative phosphorylation|ath00195,Photosynthesis|ath01100,Metabolic pathways	http://www.uniprot.org/uniprot/P19366	FALSE
575	4.5	4.56	58.2	gi|675155272	ribosomal protein L14 (chloroplast) [Populus euphratica]	11	Populus euphratica	0.4613	0.4427	0.6194	0.5462	0.3597	0.4814	0.4966	0.5938	0.48425	90.98	1e-77	P56792	rpl14	GO:0044249,cellular biosynthetic process|GO:0034641,cellular nitrogen compound metabolic process|GO:0006807,nitrogen compound metabolic process|GO:0034645,cellular macromolecule biosynthetic process|GO:1901576,organic substance biosynthetic process|GO:0044267,cellular protein metabolic process|GO:0044260,cellular macromolecule metabolic process|GO:0043043,peptide biosynthetic process|GO:0071704,o…	GO:0015934,large ribosomal subunit|GO:0043229,intracellular organelle|GO:0043228,non-membrane-bounded organelle|GO:0043227,membrane-bounded organelle|GO:0043226,organelle|GO:0005737,cytoplasm|GO:0044446,intracellular organelle part|GO:0009536,plastid|GO:0030529,ribonucleoprotein complex|GO:0009507,chloroplast|GO:0044391,ribosomal subunit|GO:0005840,ribosome|GO:0032991,macromolecular complex|GO:00…	GO:0097159,organic cyclic compound binding|GO:0019843,rRNA binding|GO:0003735,structural constituent of ribosome|GO:0003723,RNA binding|GO:0003676,nucleic acid binding|GO:0005198,structural molecule activity|GO:1901363,heterocyclic compound binding|GO:0005488,binding	ath03010,Ribosome	http://www.uniprot.org/uniprot/P56792	FALSE
922	2.37	2.43	38.1	gi|675155288	NADH-plastoquinone oxidoreductase subunit I (chloroplast) [Populus euphratica]	5	Populus euphratica	0.2679	0.5526	0.4246	0.5898	0.4571	0.7218	0.7379	0.7735	0.471875	90.8	2e-115	P56755	ndhI	GO:0044710,single-organism metabolic process|GO:0019684,photosynthesis, light reaction|GO:0009987,cellular process|GO:0044237,cellular metabolic process|GO:0055114,oxidation-reduction process|GO:0008152,metabolic process|GO:0006091,generation of precursor metabolites and energy|GO:0015979,photosynthesis|GO:0044699,single-organism process	GO:0055035,plastid thylakoid membrane|GO:0034357,photosynthetic membrane|GO:0031976,plastid thylakoid|GO:0043229,intracellular organelle|GO:0009579,thylakoid|GO:0043227,membrane-bounded organelle|GO:0043226,organelle|GO:0009535,chloroplast thylakoid membrane|GO:0009534,chloroplast thylakoid|GO:0031984,organelle subcompartment|GO:0016020,membrane|GO:0044436,thylakoid part|GO:0044435,plastid part|G…	GO:0005488,binding|GO:0043169,cation binding|GO:0048038,quinone binding|GO:0051539,4 iron, 4 sulfur cluster binding|GO:0046914,transition metal ion binding|GO:0003824,catalytic activity|GO:0048037,cofactor binding|GO:0008137,NADH dehydrogenase (ubiquinone) activity|GO:0051536,iron-sulfur cluster binding|GO:0043167,ion binding|GO:0016655,oxidoreductase activity, acting on NAD(P)H, quinone or simil…	ath00190,Oxidative phosphorylation|ath01100,Metabolic pathways	http://www.uniprot.org/uniprot/P56755	FALSE
99	17.18	17.22	29.2	gi|705245186	photosystem II protein D1 (chloroplast) [Populus trichocarpa]	83	Populus trichocarpa	0.1585	0.0136	0.1419	0.015	0.1542	0.0107	0.1419	0.0117	0.149125	99.72	0	P83755	psbA	GO:0006091,generation of precursor metabolites and energy|GO:0009635,response to herbicide|GO:0015979,photosynthesis|GO:0044699,single-organism process|GO:0044267,cellular protein metabolic process|GO:0044710,single-organism metabolic process|GO:0044260,cellular macromolecule metabolic process|GO:0019684,photosynthesis, light reaction|GO:0009636,response to toxic substance|GO:0009772,photosynthet…	GO:0055035,plastid thylakoid membrane|GO:0034357,photosynthetic membrane|GO:0031976,plastid thylakoid|GO:0043229,intracellular organelle|GO:0005622,intracellular|GO:0043227,membrane-bounded organelle|GO:0043226,organelle|GO:0031224,intrinsic component of membrane|GO:0009535,chloroplast thylakoid membrane|GO:0009534,chloroplast thylakoid|GO:0031984,organelle subcompartment|GO:0016021,integral comp…	GO:0043169,cation binding|GO:0016168,chlorophyll binding|GO:0009055,electron carrier activity|GO:0046914,transition metal ion binding|GO:0046906,tetrapyrrole binding|GO:0097159,organic cyclic compound binding|GO:0010242,oxygen evolving activity|GO:0043167,ion binding|GO:0003824,catalytic activity|GO:0005488,binding|GO:0005515,protein binding|GO:0045156,electron transporter, transferring electrons…	ath00195,Photosynthesis|ath01100,Metabolic pathways	http://www.uniprot.org/uniprot/P83755	FALSE
11	45.99	46.1	57	gi|705245189	ATP synthase CF1 alpha subunit (chloroplast) [Populus trichocarpa]	154	Populus trichocarpa	0.2582	0.0112	0.2355	0.0017	0.2249	0.0048	0.2089	0.0007	0.231875	94.87	0	P56757	atpA	GO:0009167,purine ribonucleoside monophosphate metabolic process|GO:0009165,nucleotide biosynthetic process|GO:0009163,nucleoside biosynthetic process|GO:0009161,ribonucleoside monophosphate metabolic process|GO:1901362,organic cyclic compound biosynthetic process|GO:0042451,purine nucleoside biosynthetic process|GO:0009168,purine ribonucleoside monophosphate biosynthetic process|GO:0044710,singl…	GO:0055035,plastid thylakoid membrane|GO:0034357,photosynthetic membrane|GO:0031976,plastid thylakoid|GO:0043229,intracellular organelle|GO:0009579,thylakoid|GO:0043227,membrane-bounded organelle|GO:0043226,organelle|GO:0009535,chloroplast thylakoid membrane|GO:0009534,chloroplast thylakoid|GO:0031984,organelle subcompartment|GO:0016020,membrane|GO:0044436,thylakoid part|GO:0044435,plastid part|G…	GO:0035639,purine ribonucleoside triphosphate binding|GO:0036442,hydrogen-exporting ATPase activity|GO:0005488,binding|GO:0016887,ATPase activity|GO:0043167,ion binding|GO:1901363,heterocyclic compound binding|GO:0032550,purine ribonucleoside binding|GO:0001882,nucleoside binding|GO:0043168,anion binding|GO:0042625,ATPase activity, coupled to transmembrane movement of ions|GO:0042626,ATPase activ…	ath00190,Oxidative phosphorylation|ath00195,Photosynthesis|ath01100,Metabolic pathways	http://www.uniprot.org/uniprot/P56757	FALSE
55	23.55	23.57	36	gi|705245197	photosystem II protein D2 (chloroplast) [Populus trichocarpa]	95	Populus trichocarpa	0.1722	0.0183	0.1271	0.0146	0.1738	0.016	0.1343	0.0129	0.15185	99.15	0	P56761	psbD	GO:0006091,generation of precursor metabolites and energy|GO:0015979,photosynthesis|GO:0044699,single-organism process|GO:0044267,cellular protein metabolic process|GO:0044710,single-organism metabolic process|GO:0044260,cellular macromolecule metabolic process|GO:0019684,photosynthesis, light reaction|GO:0009772,photosynthetic electron transport in photosystem II|GO:0071704,organic substance met…	GO:0055035,plastid thylakoid membrane|GO:0034357,photosynthetic membrane|GO:0031976,plastid thylakoid|GO:0043229,intracellular organelle|GO:0005622,intracellular|GO:0043227,membrane-bounded organelle|GO:0043226,organelle|GO:0031224,intrinsic component of membrane|GO:0009535,chloroplast thylakoid membrane|GO:0009534,chloroplast thylakoid|GO:0031984,organelle subcompartment|GO:0016021,integral comp…	GO:0043169,cation binding|GO:0016168,chlorophyll binding|GO:0046914,transition metal ion binding|GO:0046906,tetrapyrrole binding|GO:0097159,organic cyclic compound binding|GO:0043167,ion binding|GO:0003824,catalytic activity|GO:0005488,binding|GO:0009055,electron carrier activity|GO:0045156,electron transporter, transferring electrons within the cyclic electron transport pathway of photosynthesis…	ath00195,Photosynthesis|ath01100,Metabolic pathways	http://www.uniprot.org/uniprot/P56761	FALSE
10	46.42	46.49	44.8	gi|705245198	photosystem II CP43 chlorophyll apoprotein (chloroplast) [Populus trichocarpa]	182	Populus trichocarpa	0.0787	0	0.0904	0.0001	0.0802	0	0.0912	0.0002	0.085125	98.52	0	P56778	psbC	GO:0006091,generation of precursor metabolites and energy|GO:0015979,photosynthesis|GO:0044699,single-organism process|GO:0044267,cellular protein metabolic process|GO:0044710,single-organism metabolic process|GO:0044260,cellular macromolecule metabolic process|GO:0019684,photosynthesis, light reaction|GO:0009772,photosynthetic electron transport in photosystem II|GO:0071704,organic substance met…	GO:0055035,plastid thylakoid membrane|GO:0034357,photosynthetic membrane|GO:0031976,plastid thylakoid|GO:0043229,intracellular organelle|GO:0005622,intracellular|GO:0043227,membrane-bounded organelle|GO:0043226,organelle|GO:0031224,intrinsic component of membrane|GO:0009535,chloroplast thylakoid membrane|GO:0009534,chloroplast thylakoid|GO:0031984,organelle subcompartment|GO:0016021,integral comp…	GO:0043169,cation binding|GO:0016168,chlorophyll binding|GO:0046906,tetrapyrrole binding|GO:0097159,organic cyclic compound binding|GO:0043167,ion binding|GO:0005488,binding|GO:0045156,electron transporter, transferring electrons within the cyclic electron transport pathway of photosynthesis activity|GO:0046872,metal ion binding|GO:1901363,heterocyclic compound binding|GO:0009055,electron carrier…	ath00195,Photosynthesis|ath01100,Metabolic pathways	http://www.uniprot.org/uniprot/P56778	FALSE
40	27.18	27.19	29	gi|705245201	photosystem I P700 apoprotein A2 (chloroplast) [Populus trichocarpa]	74	Populus trichocarpa	0.3404	0.0027	0.3133	0.0014	0.2805	0.0008	0.2754	0.0004	0.3024	98.23	0	P56767	psaB	GO:0044267,cellular protein metabolic process|GO:0044710,single-organism metabolic process|GO:0044260,cellular macromolecule metabolic process|GO:0044238,primary metabolic process|GO:0019538,protein metabolic process|GO:0044237,cellular metabolic process|GO:0009987,cellular process|GO:0055114,oxidation-reduction process|GO:0018298,protein-chromophore linkage|GO:0043170,macromolecule metabolic pro…	GO:0055035,plastid thylakoid membrane|GO:0034357,photosynthetic membrane|GO:0031976,plastid thylakoid|GO:0043229,intracellular organelle|GO:0005622,intracellular|GO:0043227,membrane-bounded organelle|GO:0043226,organelle|GO:0031224,intrinsic component of membrane|GO:0009535,chloroplast thylakoid membrane|GO:0009534,chloroplast thylakoid|GO:0031984,organelle subcompartment|GO:0016021,integral comp…	GO:0043169,cation binding|GO:0016168,chlorophyll binding|GO:0051539,4 iron, 4 sulfur cluster binding|GO:0046906,tetrapyrrole binding|GO:0097159,organic cyclic compound binding|GO:0051536,iron-sulfur cluster binding|GO:0000287,magnesium ion binding|GO:0043167,ion binding|GO:0003824,catalytic activity|GO:0005488,binding|GO:0009055,electron carrier activity|GO:0051540,metal cluster binding|GO:004687…	ath00195,Photosynthesis|ath01100,Metabolic pathways	http://www.uniprot.org/uniprot/P56767	FALSE
726	4	4	22.9	gi|705245218	photosystem II cytochrome b559 alpha subunit (chloroplast) [Populus trichocarpa]	4	Populus trichocarpa	0.2884	0.3893	0.3733	0.3006	0.3105	0.2648	0.3733	0.2186	0.336375	98.8	6e-54	P56779	psbE	GO:0044710,single-organism metabolic process|GO:0019684,photosynthesis, light reaction|GO:0009987,cellular process|GO:0044237,cellular metabolic process|GO:0022900,electron transport chain|GO:0044763,single-organism cellular process|GO:0055114,oxidation-reduction process|GO:0008152,metabolic process|GO:0006091,generation of precursor metabolites and energy|GO:0015979,photosynthesis|GO:0044699,sin…	GO:0055035,plastid thylakoid membrane|GO:0034357,photosynthetic membrane|GO:0031976,plastid thylakoid|GO:0043229,intracellular organelle|GO:0005622,intracellular|GO:0043227,membrane-bounded organelle|GO:0043226,organelle|GO:0031224,intrinsic component of membrane|GO:0009535,chloroplast thylakoid membrane|GO:0009534,chloroplast thylakoid|GO:0031984,organelle subcompartment|GO:0016021,integral comp…	GO:0043169,cation binding|GO:0020037,heme binding|GO:0046914,transition metal ion binding|GO:0046906,tetrapyrrole binding|GO:0097159,organic cyclic compound binding|GO:0043167,ion binding|GO:0005488,binding|GO:0005506,iron ion binding|GO:0046872,metal ion binding|GO:1901363,heterocyclic compound binding|GO:0009055,electron carrier activity	ath00195,Photosynthesis|ath01100,Metabolic pathways	http://www.uniprot.org/uniprot/P56779	FALSE
9	46.54	46.33	45.9	gi|705245225	PSII CP47 chlorophyll apoprotein	148	Populus trichocarpa	0.1057	0	0.1459	0	0.1236	0	0.166	0	0.1353	97.64	0	P56777	psbB	GO:0006091,generation of precursor metabolites and energy|GO:0015979,photosynthesis|GO:0044699,single-organism process|GO:0044267,cellular protein metabolic process|GO:0044710,single-organism metabolic process|GO:0044260,cellular macromolecule metabolic process|GO:0019684,photosynthesis, light reaction|GO:0009772,photosynthetic electron transport in photosystem II|GO:0071704,organic substance met…	GO:0055035,plastid thylakoid membrane|GO:0034357,photosynthetic membrane|GO:0031976,plastid thylakoid|GO:0043229,intracellular organelle|GO:0005622,intracellular|GO:0043227,membrane-bounded organelle|GO:0043226,organelle|GO:0031224,intrinsic component of membrane|GO:0009535,chloroplast thylakoid membrane|GO:0009534,chloroplast thylakoid|GO:0031984,organelle subcompartment|GO:0016021,integral comp…	GO:0016168,chlorophyll binding|GO:0046906,tetrapyrrole binding|GO:0097159,organic cyclic compound binding|GO:0005488,binding|GO:0045156,electron transporter, transferring electrons within the cyclic electron transport pathway of photosynthesis activity|GO:1901363,heterocyclic compound binding|GO:0009055,electron carrier activity	ath00195,Photosynthesis|ath01100,Metabolic pathways	http://www.uniprot.org/uniprot/P56777	FALSE
1093	2.02	2.03	9.7	gi|705245229	cytochrome b6/f complex subunit IV (chloroplast) [Populus trichocarpa]	1	Populus trichocarpa	0.4093	0.4842	0.4571	0.9214	0.2938	0.4857	0.3048	0.9244	0.36625	97.5	6e-109	P56774	petD	GO:0044710,single-organism metabolic process|GO:0019684,photosynthesis, light reaction|GO:0009987,cellular process|GO:0044237,cellular metabolic process|GO:0022900,electron transport chain|GO:0044763,single-organism cellular process|GO:0055114,oxidation-reduction process|GO:0008152,metabolic process|GO:0006091,generation of precursor metabolites and energy|GO:0015979,photosynthesis|GO:0044699,sin…	GO:0055035,plastid thylakoid membrane|GO:0034357,photosynthetic membrane|GO:0031976,plastid thylakoid|GO:0043229,intracellular organelle|GO:0005622,intracellular|GO:0043227,membrane-bounded organelle|GO:0043226,organelle|GO:0031224,intrinsic component of membrane|GO:0009535,chloroplast thylakoid membrane|GO:0009534,chloroplast thylakoid|GO:0031984,organelle subcompartment|GO:0016021,integral comp…	GO:0003824,catalytic activity|GO:0045158,electron transporter, transferring electrons within cytochrome b6/f complex of photosystem II activity|GO:0045156,electron transporter, transferring electrons within the cyclic electron transport pathway of photosynthesis activity|GO:0016491,oxidoreductase activity|GO:0009055,electron carrier activity	ath00195,Photosynthesis|ath01100,Metabolic pathways	http://www.uniprot.org/uniprot/P56774	FALSE
296	8.63	8.66	36.6	gi|705245233	ribosomal protein S8 (chloroplast) [Populus trichocarpa]	8	Populus trichocarpa	0.413	0.1621	0.3133	0.1859	0.4365	0.2187	0.3281	0.2545	0.372725	82.84	2e-75	P56801	rps8	GO:0044249,cellular biosynthetic process|GO:0034641,cellular nitrogen compound metabolic process|GO:0006807,nitrogen compound metabolic process|GO:0034645,cellular macromolecule biosynthetic process|GO:1901576,organic substance biosynthetic process|GO:0044267,cellular protein metabolic process|GO:0044260,cellular macromolecule metabolic process|GO:0043043,peptide biosynthetic process|GO:0071704,o…	GO:0005737,cytoplasm|GO:0009536,plastid|GO:0032991,macromolecular complex|GO:0005840,ribosome|GO:0043232,intracellular non-membrane-bounded organelle|GO:0044464,cell part|GO:0044444,cytoplasmic part|GO:0005623,cell|GO:0030529,ribonucleoprotein complex|GO:0043229,intracellular organelle|GO:0043228,non-membrane-bounded organelle|GO:0044424,intracellular part|GO:0009507,chloroplast|GO:0043227,membra…	GO:0097159,organic cyclic compound binding|GO:0019843,rRNA binding|GO:0003735,structural constituent of ribosome|GO:0003723,RNA binding|GO:0003676,nucleic acid binding|GO:0005198,structural molecule activity|GO:1901363,heterocyclic compound binding|GO:0005488,binding	ath03010,Ribosome	http://www.uniprot.org/uniprot/P56801	FALSE
794	3.33	3.43	39.7	gi|705245235	ribosomal protein L16 (chloroplast) [Populus trichocarpa]	3	Populus trichocarpa	0.2421	0.4914	0.3404	0.4819	0.1941	0.3895	0.2704	0.3831	0.26175	92.37	1e-76	P56793	rpl16	GO:0044249,cellular biosynthetic process|GO:0034641,cellular nitrogen compound metabolic process|GO:0006807,nitrogen compound metabolic process|GO:0034645,cellular macromolecule biosynthetic process|GO:1901576,organic substance biosynthetic process|GO:0044267,cellular protein metabolic process|GO:0044260,cellular macromolecule metabolic process|GO:0043043,peptide biosynthetic process|GO:0071704,o…	GO:0005737,cytoplasm|GO:0009536,plastid|GO:0032991,macromolecular complex|GO:0005840,ribosome|GO:0043232,intracellular non-membrane-bounded organelle|GO:0044464,cell part|GO:0044444,cytoplasmic part|GO:0005623,cell|GO:0030529,ribonucleoprotein complex|GO:0043229,intracellular organelle|GO:0043228,non-membrane-bounded organelle|GO:0044424,intracellular part|GO:0009507,chloroplast|GO:0043227,membra…	GO:0097159,organic cyclic compound binding|GO:0019843,rRNA binding|GO:0003735,structural constituent of ribosome|GO:0003723,RNA binding|GO:0003676,nucleic acid binding|GO:0005198,structural molecule activity|GO:1901363,heterocyclic compound binding|GO:0005488,binding	ath03010,Ribosome	http://www.uniprot.org/uniprot/P56793	FALSE
311	8.37	8.47	31.6	gi|705245244	NADH-plastoquinone oxidoreductase subunit 7 (chloroplast) [Populus trichocarpa]	9	Populus trichocarpa	0.3733	0.0791	0.3837	0.1206	0.2884	0.1289	0.2965	0.0826	0.335475	88.3	0	P56753	ndhH	GO:0044710,single-organism metabolic process|GO:0006810,transport|GO:0019684,photosynthesis, light reaction|GO:0009987,cellular process|GO:0044237,cellular metabolic process|GO:0051179,localization|GO:0055114,oxidation-reduction process|GO:0008152,metabolic process|GO:0006091,generation of precursor metabolites and energy|GO:0051234,establishment of localization|GO:0015979,photosynthesis|GO:00446…	GO:0055035,plastid thylakoid membrane|GO:0034357,photosynthetic membrane|GO:0031976,plastid thylakoid|GO:0043229,intracellular organelle|GO:0009579,thylakoid|GO:0043227,membrane-bounded organelle|GO:0043226,organelle|GO:0009535,chloroplast thylakoid membrane|GO:0009534,chloroplast thylakoid|GO:0031984,organelle subcompartment|GO:0016020,membrane|GO:0044436,thylakoid part|GO:0044435,plastid part|G…	GO:0005488,binding|GO:0050662,coenzyme binding|GO:0003824,catalytic activity|GO:0051287,NAD binding|GO:0000166,nucleotide binding|GO:0036094,small molecule binding|GO:0016655,oxidoreductase activity, acting on NAD(P)H, quinone or similar compound as acceptor|GO:0048037,cofactor binding|GO:0016651,oxidoreductase activity, acting on NAD(P)H|GO:0097159,organic cyclic compound binding|GO:0048038,quin…	ath00190,Oxidative phosphorylation|ath01100,Metabolic pathways	http://www.uniprot.org/uniprot/P56753	FALSE
132	14.35	14.36	90.1	gi|705245249	photosystem I subunit VII (chloroplast) [Populus trichocarpa]	20	Populus trichocarpa	0.2128	0.0361	0.2582	0.088	0.2109	0.0249	0.263	0.0603	0.236225	100	9e-56	P62090	psaC	GO:0044710,single-organism metabolic process|GO:0019684,photosynthesis, light reaction|GO:0009987,cellular process|GO:0044237,cellular metabolic process|GO:0022900,electron transport chain|GO:0044763,single-organism cellular process|GO:0044699,single-organism process|GO:0008152,metabolic process|GO:0006091,generation of precursor metabolites and energy|GO:0009773,photosynthetic electron transport…	GO:0055035,plastid thylakoid membrane|GO:0034357,photosynthetic membrane|GO:0031976,plastid thylakoid|GO:0043229,intracellular organelle|GO:0005622,intracellular|GO:0043227,membrane-bounded organelle|GO:0043226,organelle|GO:0009535,chloroplast thylakoid membrane|GO:0009534,chloroplast thylakoid|GO:0031984,organelle subcompartment|GO:0016020,membrane|GO:0044436,thylakoid part|GO:0044435,plastid pa…	GO:0016491,oxidoreductase activity|GO:0043169,cation binding|GO:0051540,metal cluster binding|GO:0051536,iron-sulfur cluster binding|GO:0043167,ion binding|GO:0003824,catalytic activity|GO:0005488,binding|GO:0009055,electron carrier activity|GO:0046872,metal ion binding|GO:0051539,4 iron, 4 sulfur cluster binding	ath00195,Photosynthesis|ath01100,Metabolic pathways	http://www.uniprot.org/uniprot/P62090	FALSE
162	12.94	13	64.9	gi|705245258	hypothetical chloroplast RF34 (chloroplast) [Populus trichocarpa]	10	Populus trichocarpa	0.3802	0.1139	0.4786	0.0949	0.3467	0.0513	0.4699	0.0468	0.41885	94.05	8e-118	P61843	ycf3	GO:0008152,metabolic process|GO:0009987,cellular process|GO:0015979,photosynthesis|GO:0044237,cellular metabolic process	GO:0055035,plastid thylakoid membrane|GO:0034357,photosynthetic membrane|GO:0031976,plastid thylakoid|GO:0043229,intracellular organelle|GO:0009579,thylakoid|GO:0043227,membrane-bounded organelle|GO:0043226,organelle|GO:0009535,chloroplast thylakoid membrane|GO:0009534,chloroplast thylakoid|GO:0031984,organelle subcompartment|GO:0016020,membrane|GO:0044436,thylakoid part|GO:0044435,plastid part|G…			http://www.uniprot.org/uniprot/P61843	FALSE
1483	1.7	1.96	1.6	gi|743784431	PREDICTED: uncharacterized protein LOC105124168 isoform X3 [Populus euphratica]	1	Populus euphratica	0.5058	0.3364	0.4406	0.2856	0.5395	0.3645	0.4699	0.3063	0.48895	24.88	2e-14	Q8LPQ5	BTS	GO:0031668,cellular response to extracellular stimulus|GO:0031669,cellular response to nutrient levels|GO:0033554,cellular response to stress|GO:0042594,response to starvation|GO:0050896,response to stimulus|GO:0009987,cellular process|GO:0009991,response to extracellular stimulus|GO:0051716,cellular response to stimulus|GO:0031667,response to nutrient levels|GO:0008152,metabolic process|GO:00069…		GO:0043169,cation binding|GO:0046914,transition metal ion binding|GO:0043167,ion binding|GO:0003824,catalytic activity|GO:0008270,zinc ion binding|GO:0046872,metal ion binding|GO:0016874,ligase activity|GO:0005488,binding		http://www.uniprot.org/uniprot/Q8LPQ5	FALSE
1294	2	2	17.1	gi|743785114	PREDICTED: aspartate-semialdehyde dehydrogenase-like [Populus euphratica]	3	Populus euphratica	0.5012	0.5449	0.3162	0.4811	0.3767	0.3805	0.2377	0.3448	0.35795	82.4	0	Q8VYI4	At1g14810	GO:0044238,primary metabolic process|GO:0006139,nucleobase-containing compound metabolic process|GO:0019752,carboxylic acid metabolic process|GO:0016053,organic acid biosynthetic process|GO:0034654,nucleobase-containing compound biosynthetic process|GO:0034641,cellular nitrogen compound metabolic process|GO:0009165,nucleotide biosynthetic process|GO:0009067,aspartate family amino acid biosyntheti…	GO:0005737,cytoplasm|GO:0009536,plastid|GO:0043231,intracellular membrane-bounded organelle|GO:0009532,plastid stroma|GO:0009570,chloroplast stroma|GO:0044464,cell part|GO:0044444,cytoplasmic part|GO:0005739,mitochondrion|GO:0005622,intracellular|GO:0044446,intracellular organelle part|GO:0043229,intracellular organelle|GO:0005623,cell|GO:0044435,plastid part|GO:0044434,chloroplast part|GO:004442…	GO:0050662,coenzyme binding|GO:0050661,NADP binding|GO:0051287,NAD binding|GO:0016620,oxidoreductase activity, acting on the aldehyde or oxo group of donors, NAD or NADP as acceptor|GO:0000166,nucleotide binding|GO:0036094,small molecule binding|GO:0003824,catalytic activity|GO:0016903,oxidoreductase activity, acting on the aldehyde or oxo group of donors|GO:0048037,cofactor binding|GO:0005488,bi…	ath00300,Lysine biosynthesis|ath00270,Cysteine and methionine metabolism|ath01210,2-Oxocarboxylic acid metabolism|ath00261,Monobactam biosynthesis|ath00260,Glycine, serine and threonine metabolism|ath01230,Biosynthesis of amino acids|ath01110,Biosynthesis of secondary metabolites|ath01100,Metabolic pathways	http://www.uniprot.org/uniprot/Q8VYI4	FALSE
297	8.62	9.41	62.7	gi|743795553	PREDICTED: malate dehydrogenase, glyoxysomal [Populus euphratica]	31	Populus euphratica	0.2754	0.9881	0.2291	0.7903	0.1585	0.5928	0.1419	0.7668	0.201225	83.76	0	O82399	At2g22780	GO:0034440,lipid oxidation|GO:0009894,regulation of catabolic process|GO:0044238,primary metabolic process|GO:0080090,regulation of primary metabolic process|GO:0031329,regulation of cellular catabolic process|GO:0031326,regulation of cellular biosynthetic process|GO:0031323,regulation of cellular metabolic process|GO:0006631,fatty acid metabolic process|GO:0019752,carboxylic acid metabolic proce…	GO:0005737,cytoplasm|GO:0009536,plastid|GO:0043231,intracellular membrane-bounded organelle|GO:0044464,cell part|GO:0005777,peroxisome|GO:0044444,cytoplasmic part|GO:0005623,cell|GO:0005622,intracellular|GO:0042579,microbody|GO:0043229,intracellular organelle|GO:0044424,intracellular part|GO:0009514,glyoxysome|GO:0043227,membrane-bounded organelle|GO:0043226,organelle|GO:0009507,chloroplast	GO:0016614,oxidoreductase activity, acting on CH-OH group of donors|GO:0016615,malate dehydrogenase activity|GO:0016616,oxidoreductase activity, acting on the CH-OH group of donors, NAD or NADP as acceptor|GO:0003824,catalytic activity|GO:0030060,L-malate dehydrogenase activity|GO:0016491,oxidoreductase activity	ath00630,Glyoxylate and dicarboxylate metabolism|ath00620,Pyruvate metabolism|ath00020,Citrate cycle (TCA cycle)|ath00270,Cysteine and methionine metabolism|ath00710,Carbon fixation in photosynthetic organisms|ath01200,Carbon metabolism|ath01110,Biosynthesis of secondary metabolites|ath01100,Metabolic pathways	http://www.uniprot.org/uniprot/O82399	FALSE
953	2.24	2.29	19.5	gi|743795881	PREDICTED: cinnamoyl-CoA reductase 1 isoform X1 [Populus euphratica]	2	Populus euphratica	0.133	0.1769	0.4742	0.4302	0.1282	0.1551	0.3802	0.3282	0.2789	79.57	0	Q9FGH3	At5g58490	GO:0019758,glycosinolate biosynthetic process|GO:0019757,glycosinolate metabolic process|GO:0044249,cellular biosynthetic process|GO:0044281,small molecule metabolic process|GO:0044699,single-organism process|GO:1901576,organic substance biosynthetic process|GO:0044710,single-organism metabolic process|GO:0044711,single-organism biosynthetic process|GO:0071704,organic substance metabolic process|…	GO:0005737,cytoplasm|GO:0005829,cytosol|GO:0044464,cell part|GO:0005623,cell|GO:0005622,intracellular|GO:0044444,cytoplasmic part|GO:0044424,intracellular part	GO:0003824,catalytic activity|GO:0048037,cofactor binding|GO:0005488,binding|GO:0050662,coenzyme binding		http://www.uniprot.org/uniprot/Q9FGH3	FALSE
1100	2.01	8.03	25.1	gi|743797103	PREDICTED: cell division protein FtsZ homolog 2-1, chloroplastic-like isoform X5 [Populus euphratica]	10	Populus euphratica	0.2805	0.1919	0.4742	0.3101	0.3311	0.219	0.5598	0.3817	0.4114	73.03	0	O82533	FTSZ2-1	GO:0006996,organelle organization|GO:0051258,protein polymerization|GO:0022607,cellular component assembly|GO:0071822,protein complex subunit organization|GO:0070271,protein complex biogenesis|GO:0043933,macromolecular complex subunit organization|GO:0071840,cellular component organization or biogenesis|GO:0006461,protein complex assembly|GO:0016043,cellular component organization|GO:0065003,macr…	GO:0055035,plastid thylakoid membrane|GO:0034357,photosynthetic membrane|GO:0031976,plastid thylakoid|GO:0043229,intracellular organelle|GO:0005622,intracellular|GO:0043227,membrane-bounded organelle|GO:0043226,organelle|GO:0009535,chloroplast thylakoid membrane|GO:0009534,chloroplast thylakoid|GO:0031984,organelle subcompartment|GO:0009532,plastid stroma|GO:0009570,chloroplast stroma|GO:0016020,…	GO:0035639,purine ribonucleoside triphosphate binding|GO:0005488,binding|GO:0043167,ion binding|GO:1901363,heterocyclic compound binding|GO:1901265,nucleoside phosphate binding|GO:0001882,nucleoside binding|GO:0043168,anion binding|GO:0016462,pyrophosphatase activity|GO:0000166,nucleotide binding|GO:0032561,guanyl ribonucleotide binding|GO:0001883,purine nucleoside binding|GO:0032549,ribonucleosi…		http://www.uniprot.org/uniprot/O82533	FALSE
17	42.62	42.62	56.4	gi|743804898	PREDICTED: transketolase, chloroplastic [Populus euphratica]	89	Populus euphratica	0.2291	0.3026	0.3048	0.1881	0.2582	0.2591	0.3597	0.1697	0.28795	82.88	0	F4IW47	TKL-2	GO:0008152,metabolic process|GO:0015977,carbon fixation|GO:0015979,photosynthesis|GO:0044699,single-organism process|GO:1901576,organic substance biosynthetic process|GO:0044710,single-organism metabolic process|GO:0044711,single-organism biosynthetic process|GO:0019685,photosynthesis, dark reaction|GO:0071704,organic substance metabolic process|GO:0046686,response to cadmium ion|GO:0019253,reduc…	GO:0055035,plastid thylakoid membrane|GO:0034357,photosynthetic membrane|GO:0031976,plastid thylakoid|GO:0043229,intracellular organelle|GO:0005622,intracellular|GO:0043227,membrane-bounded organelle|GO:0043226,organelle|GO:0009535,chloroplast thylakoid membrane|GO:0009534,chloroplast thylakoid|GO:0031984,organelle subcompartment|GO:0009532,plastid stroma|GO:0009570,chloroplast stroma|GO:0016020,…	GO:0004802,transketolase activity|GO:0043169,cation binding|GO:0043167,ion binding|GO:0003824,catalytic activity|GO:0016740,transferase activity|GO:0005488,binding|GO:0016744,transferase activity, transferring aldehyde or ketonic groups|GO:0046872,metal ion binding	ath00030,Pentose phosphate pathway|ath00710,Carbon fixation in photosynthetic organisms|ath01230,Biosynthesis of amino acids|ath01200,Carbon metabolism|ath01110,Biosynthesis of secondary metabolites|ath01100,Metabolic pathways	http://www.uniprot.org/uniprot/F4IW47	FALSE
829	2.92	3.22	18.1	gi|743807272	PREDICTED: adenylate kinase 5, chloroplastic [Populus euphratica]	4	Populus euphratica	0.1871	0.1467	0.5598	0.3804	0.1528	0.1313	0.4571	0.2971	0.3392	74.53	0	Q8VYL1	At5g35170	GO:0032774,RNA biosynthetic process|GO:0016310,phosphorylation|GO:0090304,nucleic acid metabolic process|GO:0044249,cellular biosynthetic process|GO:0034641,cellular nitrogen compound metabolic process|GO:0006807,nitrogen compound metabolic process|GO:0044281,small molecule metabolic process|GO:0034645,cellular macromolecule biosynthetic process|GO:1901362,organic cyclic compound biosynthetic pro…	GO:0055035,plastid thylakoid membrane|GO:0034357,photosynthetic membrane|GO:0031976,plastid thylakoid|GO:0031975,envelope|GO:0043229,intracellular organelle|GO:0005622,intracellular|GO:0043227,membrane-bounded organelle|GO:0043226,organelle|GO:0009535,chloroplast thylakoid membrane|GO:0009534,chloroplast thylakoid|GO:0031984,organelle subcompartment|GO:0016020,membrane|GO:0044436,thylakoid part|G…	GO:0019201,nucleotide kinase activity|GO:0019205,nucleobase-containing compound kinase activity|GO:0035639,purine ribonucleoside triphosphate binding|GO:0004017,adenylate kinase activity|GO:0005488,binding|GO:0043167,ion binding|GO:1901363,heterocyclic compound binding|GO:0001883,purine nucleoside binding|GO:0001882,nucleoside binding|GO:0043168,anion binding|GO:0000166,nucleotide binding|GO:0016…	ath01110,Biosynthesis of secondary metabolites|ath00230,Purine metabolism|ath01100,Metabolic pathways	http://www.uniprot.org/uniprot/Q8VYL1	FALSE
762	3.7	3.8	31.1	gi|743809778	PREDICTED: mitochondrial carnitine/acylcarnitine carrier-like protein isoform X2 [Populus euphratica]	9	Populus euphratica	0.1941	0.5236	0.4613	0.7486	0.3221	0.5692	0.7586	0.8195	0.434025	77.67	6e-154	Q93XM7	BOU	GO:0046907,intracellular transport|GO:0006810,transport|GO:0044765,single-organism transport|GO:1902578,single-organism localization|GO:0051649,establishment of localization in cell|GO:0006839,mitochondrial transport|GO:1902582,single-organism intracellular transport|GO:0051234,establishment of localization|GO:0051179,localization|GO:0044699,single-organism process|GO:0051641,cellular localization	GO:0044464,cell part|GO:0031975,envelope|GO:0043229,intracellular organelle|GO:0043227,membrane-bounded organelle|GO:0043226,organelle|GO:0031224,intrinsic component of membrane|GO:0005737,cytoplasm|GO:0009536,plastid|GO:0031090,organelle membrane|GO:0016021,integral component of membrane|GO:0016020,membrane|GO:0044444,cytoplasmic part|GO:0005739,mitochondrion|GO:0031967,organelle envelope|GO:003…			http://www.uniprot.org/uniprot/Q93XM7	FALSE
253	10	10	26	gi|743810316	PREDICTED: cytochrome b6 [Populus euphratica]	17	Populus euphratica	0.1995	0.3142	0.1472	0.3836	0.2443	0.4178	0.177	0.5138	0.192	97.67	2e-145	P56773	petB	GO:0044710,single-organism metabolic process|GO:0015980,energy derivation by oxidation of organic compounds|GO:0009987,cellular process|GO:0044237,cellular metabolic process|GO:0022900,electron transport chain|GO:0045333,cellular respiration|GO:0044699,single-organism process|GO:0008152,metabolic process|GO:0022904,respiratory electron transport chain|GO:0044763,single-organism cellular process|G…	GO:0055035,plastid thylakoid membrane|GO:0034357,photosynthetic membrane|GO:0031976,plastid thylakoid|GO:0043229,intracellular organelle|GO:0005622,intracellular|GO:0043227,membrane-bounded organelle|GO:0043226,organelle|GO:0031224,intrinsic component of membrane|GO:0009535,chloroplast thylakoid membrane|GO:0009534,chloroplast thylakoid|GO:0031984,organelle subcompartment|GO:0016021,integral comp…	GO:0043169,cation binding|GO:0046914,transition metal ion binding|GO:0020037,heme binding|GO:0046906,tetrapyrrole binding|GO:0097159,organic cyclic compound binding|GO:0043167,ion binding|GO:0003824,catalytic activity|GO:0005488,binding|GO:0009055,electron carrier activity|GO:0045158,electron transporter, transferring electrons within cytochrome b6/f complex of photosystem II activity|GO:0005506,…	ath00195,Photosynthesis|ath01100,Metabolic pathways	http://www.uniprot.org/uniprot/P56773	FALSE
449	6.05	6.11	29.5	gi|743811825	PREDICTED: probable pyridoxal biosynthesis protein PDX1 [Populus euphratica]	7	Populus euphratica	0.4742	0.2193	0.3532	0.1796	0.4875	0.2113	0.4018	0.1734	0.429175	92.56	0	Q8L940	PDX13	GO:0019222,regulation of metabolic process|GO:0010335,response to non-ionic osmotic stress|GO:0006778,porphyrin-containing compound metabolic process|GO:0044281,small molecule metabolic process|GO:0044283,small molecule biosynthetic process|GO:1901362,organic cyclic compound biosynthetic process|GO:1901360,organic cyclic compound metabolic process|GO:0044710,single-organism metabolic process|GO:0…	GO:0005737,cytoplasm|GO:0005829,cytosol|GO:0016020,membrane|GO:0044464,cell part|GO:0005623,cell|GO:0005622,intracellular|GO:0044444,cytoplasmic part|GO:0071944,cell periphery|GO:0012505,endomembrane system|GO:0005886,plasma membrane|GO:0044424,intracellular part	GO:0036381,pyridoxal 5'-phosphate synthase (glutamine hydrolysing) activity|GO:0016840,carbon-nitrogen lyase activity|GO:0016843,amine-lyase activity|GO:0016829,lyase activity|GO:0003824,catalytic activity|GO:0005488,binding|GO:0005515,protein binding|GO:0046983,protein dimerization activity|GO:0046982,protein heterodimerization activity|GO:0042802,identical protein binding|GO:0042803,protein hom…	ath00750,Vitamin B6 metabolism	http://www.uniprot.org/uniprot/Q8L940	FALSE
421	6.29	6.31	47.8	gi|743812897	PREDICTED: 17.9 kDa class II heat shock protein-like [Populus euphratica]	14	Populus euphratica	0.1472	0.0466	0.1159	0.0574	0.1445	0.0657	0.1169	0.0841	0.131125	62.7	4e-48	P29830	HSP17.6	GO:0006457,protein folding|GO:0009314,response to radiation|GO:0000302,response to reactive oxygen species|GO:0009416,response to light stimulus|GO:0042221,response to chemical|GO:0044267,cellular protein metabolic process|GO:0051716,cellular response to stimulus|GO:0010035,response to inorganic substance|GO:0044260,cellular macromolecule metabolic process|GO:0006979,response to oxidative stress|…	GO:0005737,cytoplasm|GO:0044464,cell part|GO:0005623,cell|GO:0005622,intracellular|GO:0044424,intracellular part		ath04141,Protein processing in endoplasmic reticulum	http://www.uniprot.org/uniprot/P29830	FALSE
1215	2	4	21.5	gi|743815341	PREDICTED: histone H2A [Populus euphratica]	3	Populus euphratica	0.3162	0.6915	0.4699	0.9585	0.3373	0.6542	0.6026	0.9098	0.4315	88.42	2e-40	Q9FJE8	At5g59870	GO:0044699,single-organism process|GO:0008283,cell proliferation	GO:0031974,membrane-enclosed lumen|GO:0044815,DNA packaging complex|GO:0043229,intracellular organelle|GO:0043228,non-membrane-bounded organelle|GO:0000785,chromatin|GO:0000786,nucleosome|GO:0043227,membrane-bounded organelle|GO:0043226,organelle|GO:0030054,cell junction|GO:0031981,nuclear lumen|GO:0005730,nucleolus|GO:0055044,symplast|GO:0005634,nucleus|GO:0009506,plasmodesma|GO:0005694,chromoso…	GO:0003682,chromatin binding|GO:0005515,protein binding|GO:0097159,organic cyclic compound binding|GO:0044877,macromolecular complex binding|GO:0005488,binding|GO:0003676,nucleic acid binding|GO:0003677,DNA binding|GO:0046983,protein dimerization activity|GO:0046982,protein heterodimerization activity|GO:1901363,heterocyclic compound binding		http://www.uniprot.org/uniprot/Q9FJE8	FALSE
401	6.62	6.67	26.3	gi|743821311	PREDICTED: glutathione S-transferase DHAR3, chloroplastic [Populus euphratica]	11	Populus euphratica	0.1271	0.4177	0.0619	0.303	0.1282	0.4588	0.0592	0.326	0.0941	66.3	2e-132	Q8LE52	DHAR3	GO:0008152,metabolic process|GO:0044248,cellular catabolic process|GO:0061024,membrane organization|GO:0014070,response to organic cyclic compound|GO:0010027,thylakoid membrane organization|GO:0044699,single-organism process|GO:0009657,plastid organization|GO:0044712,single-organism catabolic process|GO:0044267,cellular protein metabolic process|GO:0044710,single-organism metabolic process|GO:004…	GO:0031975,envelope|GO:0043229,intracellular organelle|GO:0043227,membrane-bounded organelle|GO:0043226,organelle|GO:0005737,cytoplasm|GO:0009941,chloroplast envelope|GO:0009536,plastid|GO:0009532,plastid stroma|GO:0009570,chloroplast stroma|GO:0044435,plastid part|GO:0044434,chloroplast part|GO:0031967,organelle envelope|GO:0009507,chloroplast|GO:0009526,plastid envelope|GO:0043231,intracellular…	GO:0045174,glutathione dehydrogenase (ascorbate) activity|GO:0004364,glutathione transferase activity|GO:0016765,transferase activity, transferring alkyl or aryl (other than methyl) groups|GO:0016209,antioxidant activity|GO:0003824,catalytic activity|GO:0016672,oxidoreductase activity, acting on a sulfur group of donors, quinone or similar compound as acceptor|GO:0015038,glutathione disulfide oxi…		http://www.uniprot.org/uniprot/Q8LE52	FALSE
68	20.23	20.28	69.7	gi|743821942	PREDICTED: photosystem I reaction center subunit II, chloroplastic-like [Populus euphratica]	57	Populus euphratica	0.1225	0.2291	0.169	0.214	0.1614	0.0689	0.227	0.0589	0.169975	73.81	3e-99	Q9SA56	PSAD2	GO:0019220,regulation of phosphate metabolic process|GO:0080090,regulation of primary metabolic process|GO:0019222,regulation of metabolic process|GO:0016311,dephosphorylation|GO:0006470,protein dephosphorylation|GO:0050801,ion homeostasis|GO:0031323,regulation of cellular metabolic process|GO:0042592,homeostatic process|GO:0035303,regulation of dephosphorylation|GO:0006091,generation of precurso…	GO:0055035,plastid thylakoid membrane|GO:0034357,photosynthetic membrane|GO:0031976,plastid thylakoid|GO:0031975,envelope|GO:0043229,intracellular organelle|GO:0009579,thylakoid|GO:0043227,membrane-bounded organelle|GO:0043226,organelle|GO:0009535,chloroplast thylakoid membrane|GO:0009534,chloroplast thylakoid|GO:0031984,organelle subcompartment|GO:0016020,membrane|GO:0009538,photosystem I reacti…		ath00195,Photosynthesis|ath01100,Metabolic pathways	http://www.uniprot.org/uniprot/Q9SA56	FALSE
176	12.2	12.41	42.9	gi|743822923	PREDICTED: malate dehydrogenase, glyoxysomal [Populus euphratica]	26	Populus euphratica	0.1076	0.0513	0.2168	0.1416	0.1786	0.0624	0.3802	0.1927	0.2208	85.75	0	O82399	At2g22780	GO:0034440,lipid oxidation|GO:0009894,regulation of catabolic process|GO:0044238,primary metabolic process|GO:0080090,regulation of primary metabolic process|GO:0031329,regulation of cellular catabolic process|GO:0031326,regulation of cellular biosynthetic process|GO:0031323,regulation of cellular metabolic process|GO:0006631,fatty acid metabolic process|GO:0019752,carboxylic acid metabolic proce…	GO:0005737,cytoplasm|GO:0009536,plastid|GO:0043231,intracellular membrane-bounded organelle|GO:0044464,cell part|GO:0005777,peroxisome|GO:0044444,cytoplasmic part|GO:0005623,cell|GO:0005622,intracellular|GO:0042579,microbody|GO:0043229,intracellular organelle|GO:0044424,intracellular part|GO:0009514,glyoxysome|GO:0043227,membrane-bounded organelle|GO:0043226,organelle|GO:0009507,chloroplast	GO:0016614,oxidoreductase activity, acting on CH-OH group of donors|GO:0016615,malate dehydrogenase activity|GO:0016616,oxidoreductase activity, acting on the CH-OH group of donors, NAD or NADP as acceptor|GO:0003824,catalytic activity|GO:0030060,L-malate dehydrogenase activity|GO:0016491,oxidoreductase activity	ath00630,Glyoxylate and dicarboxylate metabolism|ath00620,Pyruvate metabolism|ath00020,Citrate cycle (TCA cycle)|ath00270,Cysteine and methionine metabolism|ath00710,Carbon fixation in photosynthetic organisms|ath01200,Carbon metabolism|ath01110,Biosynthesis of secondary metabolites|ath01100,Metabolic pathways	http://www.uniprot.org/uniprot/O82399	FALSE
96	17.52	17.57	44.8	gi|743827102	PREDICTED: photosystem I reaction center subunit N, chloroplastic-like isoform X1 [Populus euphratica]	13	Populus euphratica	0.3342	0.0571	0.2188	0.0232	0.4325	0.2176	0.278	0.1224	0.315875	71.02	2e-73	P49107	PSAN	GO:0008152,metabolic process|GO:0009987,cellular process|GO:0015979,photosynthesis|GO:0044237,cellular metabolic process	GO:0055035,plastid thylakoid membrane|GO:0034357,photosynthetic membrane|GO:0031976,plastid thylakoid|GO:0043229,intracellular organelle|GO:0005622,intracellular|GO:0043227,membrane-bounded organelle|GO:0043226,organelle|GO:0009535,chloroplast thylakoid membrane|GO:0009534,chloroplast thylakoid|GO:0031984,organelle subcompartment|GO:0016020,membrane|GO:0044436,thylakoid part|GO:0044435,plastid pa…	GO:0005516,calmodulin binding|GO:0005515,protein binding|GO:0005488,binding	ath00195,Photosynthesis|ath01100,Metabolic pathways	http://www.uniprot.org/uniprot/P49107	FALSE
703	4	4	12.2	gi|743832246	PREDICTED: vacuolar protein sorting-associated protein 4B-like [Populus euphratica]	2	Populus euphratica	0.2249	0.3525	0.4656	0.7024	0.1854	0.3014	0.3733	0.5556	0.3123	79.54	0	Q9ZNT0	SKD1	GO:0034440,lipid oxidation|GO:0008104,protein localization|GO:0048468,cell development|GO:0061025,membrane fusion|GO:0061024,membrane organization|GO:0055075,potassium ion homeostasis|GO:0044281,small molecule metabolic process|GO:0044282,small molecule catabolic process|GO:0098771,inorganic ion homeostasis|GO:0055078,sodium ion homeostasis|GO:0071840,cellular component organization or biogenesis…	GO:0005770,late endosome|GO:0043229,intracellular organelle|GO:0043227,membrane-bounded organelle|GO:0043226,organelle|GO:0030054,cell junction|GO:0010008,endosome membrane|GO:0005737,cytoplasm|GO:0031090,organelle membrane|GO:0005634,nucleus|GO:0016020,membrane|GO:0098805,whole membrane|GO:0031902,late endosome membrane|GO:0098588,bounding membrane of organelle|GO:0055044,symplast|GO:0012505,end…	GO:0035639,purine ribonucleoside triphosphate binding|GO:0005488,binding|GO:0016887,ATPase activity|GO:0043167,ion binding|GO:1901363,heterocyclic compound binding|GO:1901265,nucleoside phosphate binding|GO:0001882,nucleoside binding|GO:0043168,anion binding|GO:0042623,ATPase activity, coupled|GO:0008568,microtubule-severing ATPase activity|GO:0000166,nucleotide binding|GO:0001883,purine nucleosi…	ath04144,Endocytosis	http://www.uniprot.org/uniprot/Q9ZNT0	FALSE
935	2.31	2.35	27.9	gi|743833435	PREDICTED: photosystem I reaction center subunit IV A, chloroplastic-like [Populus euphratica]	45	Populus euphratica	0.3105	0.5837	0.3597	0.613	0.3373	0.668	0.4018	0.7028	0.352325	85.71	2e-29	Q9S714	PSAE2	GO:0008152,metabolic process|GO:0050801,ion homeostasis|GO:0042592,homeostatic process|GO:0042221,response to chemical|GO:0006091,generation of precursor metabolites and energy|GO:0015979,photosynthesis|GO:0044699,single-organism process|GO:0009719,response to endogenous stimulus|GO:0009735,response to cytokinin|GO:0019684,photosynthesis, light reaction|GO:0010033,response to organic substance|GO…	GO:0055035,plastid thylakoid membrane|GO:0034357,photosynthetic membrane|GO:0031976,plastid thylakoid|GO:0031975,envelope|GO:0043229,intracellular organelle|GO:0009579,thylakoid|GO:0043227,membrane-bounded organelle|GO:0043226,organelle|GO:0009535,chloroplast thylakoid membrane|GO:0009534,chloroplast thylakoid|GO:0031984,organelle subcompartment|GO:0009532,plastid stroma|GO:0009570,chloroplast st…		ath00195,Photosynthesis|ath01100,Metabolic pathways	http://www.uniprot.org/uniprot/Q9S714	FALSE
153	13.2	13.3	53.8	gi|743840443	PREDICTED: oxygen-evolving enhancer protein 2, chloroplastic-like [Populus euphratica]	39	Populus euphratica	0.1047	0.034	0.1138	0.0306	0.1247	0.0385	0.1306	0.0345	0.11845	74.31	3e-132	Q42029	PSBP1	GO:0009595,detection of biotic stimulus|GO:0008104,protein localization|GO:0019222,regulation of metabolic process|GO:0051049,regulation of transport|GO:0048585,negative regulation of response to stimulus|GO:0048583,regulation of response to stimulus|GO:0031348,negative regulation of defense response|GO:0009696,salicylic acid metabolic process|GO:0009697,salicylic acid biosynthetic process|GO:000…	GO:0031978,plastid thylakoid lumen|GO:0055035,plastid thylakoid membrane|GO:0034357,photosynthetic membrane|GO:0031976,plastid thylakoid|GO:0031977,thylakoid lumen|GO:0019898,extrinsic component of membrane|GO:0048046,apoplast|GO:0043229,intracellular organelle|GO:0009579,thylakoid|GO:0043227,membrane-bounded organelle|GO:0043226,organelle|GO:0009535,chloroplast thylakoid membrane|GO:0009534,chlo…	GO:0005488,binding|GO:0043169,cation binding|GO:0097159,organic cyclic compound binding|GO:0043167,ion binding|GO:0008266,poly(U) RNA binding|GO:0003727,single-stranded RNA binding|GO:0003723,RNA binding|GO:0003676,nucleic acid binding|GO:0008187,poly-pyrimidine tract binding|GO:0046872,metal ion binding|GO:1901363,heterocyclic compound binding|GO:0005509,calcium ion binding	ath00195,Photosynthesis|ath01100,Metabolic pathways	http://www.uniprot.org/uniprot/Q42029	FALSE
980	2.13	2.32	21.3	gi|743842996	PREDICTED: 30S ribosomal protein S6 alpha, chloroplastic [Populus euphratica]	5	Populus euphratica	0.2582	0.5283	0.0453	0.2986	0.4786	0.5078	0.078	0.2909	0.215025	70.39	1e-87	Q8VY91	RPS6	GO:0061024,membrane organization|GO:0034641,cellular nitrogen compound metabolic process|GO:0006807,nitrogen compound metabolic process|GO:0034645,cellular macromolecule biosynthetic process|GO:1901576,organic substance biosynthetic process|GO:0010027,thylakoid membrane organization|GO:0071840,cellular component organization or biogenesis|GO:0009657,plastid organization|GO:0044267,cellular protei…	GO:0055035,plastid thylakoid membrane|GO:0034357,photosynthetic membrane|GO:0031976,plastid thylakoid|GO:0043229,intracellular organelle|GO:0043228,non-membrane-bounded organelle|GO:0005622,intracellular|GO:0043227,membrane-bounded organelle|GO:0043226,organelle|GO:0009535,chloroplast thylakoid membrane|GO:0009534,chloroplast thylakoid|GO:0031984,organelle subcompartment|GO:0016020,membrane|GO:00…	GO:0097159,organic cyclic compound binding|GO:0019843,rRNA binding|GO:0003735,structural constituent of ribosome|GO:0003723,RNA binding|GO:0003676,nucleic acid binding|GO:0005198,structural molecule activity|GO:1901363,heterocyclic compound binding|GO:0005488,binding	ath03010,Ribosome	http://www.uniprot.org/uniprot/Q8VY91	FALSE
334	8.01	49.08	52.5	gi|743844327	PREDICTED: probable mediator of RNA polymerase II transcription subunit 37c isoform X2 [Populus euphratica]	69	Populus euphratica	0.2512	0.2799	0.2754	0.3329	0.3342	0.3873	0.3908	0.4862	0.3129	92.92	0	Q9LHA8	MED37C	GO:0009607,response to biotic stimulus|GO:0009628,response to abiotic stimulus|GO:0006457,protein folding|GO:0080090,regulation of primary metabolic process|GO:0019222,regulation of metabolic process|GO:0006950,response to stress|GO:0031326,regulation of cellular biosynthetic process|GO:0009266,response to temperature stimulus|GO:0031323,regulation of cellular metabolic process|GO:0000302,respons…	GO:0048046,apoplast|GO:0043229,intracellular organelle|GO:0071944,cell periphery|GO:0043227,membrane-bounded organelle|GO:0043226,organelle|GO:0005737,cytoplasm|GO:0031090,organelle membrane|GO:0005773,vacuole|GO:0005634,nucleus|GO:0016020,membrane|GO:0005739,mitochondrion|GO:0005774,vacuolar membrane|GO:0044437,vacuolar part|GO:0005794,Golgi apparatus|GO:0098588,bounding membrane of organelle|GO…	GO:0044389,ubiquitin-like protein ligase binding|GO:0035639,purine ribonucleoside triphosphate binding|GO:0019899,enzyme binding|GO:0005488,binding|GO:0043167,ion binding|GO:1901363,heterocyclic compound binding|GO:1901265,nucleoside phosphate binding|GO:0001882,nucleoside binding|GO:0043168,anion binding|GO:0000166,nucleotide binding|GO:0001883,purine nucleoside binding|GO:0032549,ribonucleoside…	ath04144,Endocytosis|ath03040,Spliceosome|ath04141,Protein processing in endoplasmic reticulum	http://www.uniprot.org/uniprot/Q9LHA8	FALSE
1138	2.01	2.01	4.2	gi|743850414	PREDICTED: phospholipase A1-Igamma2, chloroplastic-like [Populus euphratica]	1	Populus euphratica	0.0912	0.279	0.0308	0.2338	0.0711	0.237	0.0249	0.2032	0.0545	70.8	0	Q3EBR6	At2g30550	GO:0008104,protein localization|GO:0048585,negative regulation of response to stimulus|GO:0048583,regulation of response to stimulus|GO:0031348,negative regulation of defense response|GO:0009696,salicylic acid metabolic process|GO:0009697,salicylic acid biosynthetic process|GO:0007165,signal transduction|GO:0044283,small molecule biosynthetic process|GO:1901362,organic cyclic compound biosyntheti…	GO:0005737,cytoplasm|GO:0009536,plastid|GO:0043231,intracellular membrane-bounded organelle|GO:0044464,cell part|GO:0044444,cytoplasmic part|GO:0005623,cell|GO:0005622,intracellular|GO:0043229,intracellular organelle|GO:0044424,intracellular part|GO:0043227,membrane-bounded organelle|GO:0043226,organelle|GO:0009507,chloroplast	GO:0016787,hydrolase activity|GO:0047714,galactolipase activity|GO:0004806,triglyceride lipase activity|GO:0008970,phosphatidylcholine 1-acylhydrolase activity|GO:0052689,carboxylic ester hydrolase activity|GO:0003824,catalytic activity|GO:0016788,hydrolase activity, acting on ester bonds|GO:0004620,phospholipase activity|GO:0016298,lipase activity		http://www.uniprot.org/uniprot/Q3EBR6	FALSE
871	2.59	2.64	7.9	gi|743858290	PREDICTED: uncharacterized protein LOC105129868 [Populus euphratica]	2	Populus euphratica	0.4093	0.5827	0.4169	0.6309	0.3981	0.677	0.4285	0.7351	0.4132	69.7	3e-117	Q93V74	At4g34180	GO:0008104,protein localization|GO:0051234,establishment of localization|GO:0009167,purine ribonucleoside monophosphate metabolic process|GO:0006569,tryptophan catabolic process|GO:0044282,small molecule catabolic process|GO:0009161,ribonucleoside monophosphate metabolic process|GO:0071840,cellular component organization or biogenesis|GO:1901361,organic cyclic compound catabolic process|GO:004471…	GO:0005737,cytoplasm|GO:0005794,Golgi apparatus|GO:0005783,endoplasmic reticulum|GO:0005618,cell wall|GO:0044464,cell part|GO:0044444,cytoplasmic part|GO:0005623,cell|GO:0030312,external encapsulating structure|GO:0043229,intracellular organelle|GO:0071944,cell periphery|GO:0012505,endomembrane system|GO:0044424,intracellular part|GO:0005622,intracellular|GO:0043227,membrane-bounded organelle|GO:…	GO:0016787,hydrolase activity|GO:0016810,hydrolase activity, acting on carbon-nitrogen (but not peptide) bonds|GO:0016811,hydrolase activity, acting on carbon-nitrogen (but not peptide) bonds, in linear amides|GO:0003824,catalytic activity|GO:0004061,arylformamidase activity		http://www.uniprot.org/uniprot/Q93V74	FALSE
941	2.27	2.32	8.6	gi|743862013	PREDICTED: uncharacterized protein LOC105130450 [Populus euphratica]	1	Populus euphratica	0.1236	0.0406	0.6138	0.2763	0.1854	0.0739	0.9727	0.8978	0.473875	85.2	0	Q8W4D6	F17F16.7	GO:0051049,regulation of transport|GO:1901564,organonitrogen compound metabolic process|GO:0044249,cellular biosynthetic process|GO:0034641,cellular nitrogen compound metabolic process|GO:0006807,nitrogen compound metabolic process|GO:0034645,cellular macromolecule biosynthetic process|GO:1901576,organic substance biosynthetic process|GO:0050789,regulation of biological process|GO:0044699,single-…	GO:0031975,envelope|GO:0043229,intracellular organelle|GO:0043227,membrane-bounded organelle|GO:0043226,organelle|GO:0005737,cytoplasm|GO:0009941,chloroplast envelope|GO:0009536,plastid|GO:0009532,plastid stroma|GO:0009570,chloroplast stroma|GO:0044435,plastid part|GO:0044434,chloroplast part|GO:0031967,organelle envelope|GO:0009507,chloroplast|GO:0009526,plastid envelope|GO:0043231,intracellular…			http://www.uniprot.org/uniprot/Q8W4D6	FALSE
1515	1.53	1.97	10.4	gi|743864192	PREDICTED: choline-phosphate cytidylyltransferase 1-like isoform X7 [Populus euphratica]	2	Populus euphratica	0.15	0.0828	0.631	0.505	0.2333	0.0912	0.9376	0.8305	0.487975	80.58	2e-140	Q9ZV56	CCT1	GO:0042127,regulation of cell proliferation|GO:0006657,CDP-choline pathway|GO:0006656,phosphatidylcholine biosynthetic process|GO:0006650,glycerophospholipid metabolic process|GO:0044249,cellular biosynthetic process|GO:0034641,cellular nitrogen compound metabolic process|GO:0006807,nitrogen compound metabolic process|GO:0044281,small molecule metabolic process|GO:0044283,small molecule biosynthe…		GO:0016779,nucleotidyltransferase activity|GO:0004105,choline-phosphate cytidylyltransferase activity|GO:0003824,catalytic activity|GO:0016772,transferase activity, transferring phosphorus-containing groups|GO:0070567,cytidylyltransferase activity|GO:0016740,transferase activity	ath00564,Glycerophospholipid metabolism|ath01100,Metabolic pathways	http://www.uniprot.org/uniprot/Q9ZV56	FALSE
847	2.77	2.9	12.8	gi|743866454	PREDICTED: uncharacterized protein LOC105131267 [Populus euphratica]	4	Populus euphratica	0.0929	0.3845	0.2655	0.4433	0.1047	0.3691	0.263	0.4238	0.181525	70.38	9e-112	Q8RWI0	At1g54520		GO:0005737,cytoplasm|GO:0009536,plastid|GO:0043231,intracellular membrane-bounded organelle|GO:0044464,cell part|GO:0044444,cytoplasmic part|GO:0005623,cell|GO:0005622,intracellular|GO:0043229,intracellular organelle|GO:0044424,intracellular part|GO:0043227,membrane-bounded organelle|GO:0043226,organelle|GO:0009507,chloroplast			http://www.uniprot.org/uniprot/Q8RWI0	FALSE
1420	2	2	5.4	gi|743871057	PREDICTED: uncharacterized protein LOC105132130 [Populus euphratica]	1	Populus euphratica	0.1629	0.1357	0.7656	0.6261	0.1294	0.1208	0.6081	0.4288	0.4165	66.86	7e-150	Q9SJI1	At2g42750	GO:0044267,cellular protein metabolic process|GO:0006457,protein folding|GO:0044260,cellular macromolecule metabolic process|GO:0044238,primary metabolic process|GO:0019538,protein metabolic process|GO:0009987,cellular process|GO:0044237,cellular metabolic process|GO:0043170,macromolecule metabolic process|GO:0071704,organic substance metabolic process|GO:0042026,protein refolding|GO:0008152,meta…	GO:0005737,cytoplasm|GO:0009536,plastid|GO:0043231,intracellular membrane-bounded organelle|GO:0044464,cell part|GO:0044444,cytoplasmic part|GO:0005623,cell|GO:0005622,intracellular|GO:0043229,intracellular organelle|GO:0044424,intracellular part|GO:0043227,membrane-bounded organelle|GO:0043226,organelle|GO:0009507,chloroplast	GO:0043169,cation binding|GO:0051540,metal cluster binding|GO:0046914,transition metal ion binding|GO:0051536,iron-sulfur cluster binding|GO:0051087,chaperone binding|GO:0051082,unfolded protein binding|GO:0043167,ion binding|GO:0005488,binding|GO:0005515,protein binding|GO:0005506,iron ion binding|GO:0046872,metal ion binding|GO:0009055,electron carrier activity		http://www.uniprot.org/uniprot/Q9SJI1	FALSE
499	5.54	38.31	49.9	gi|743874087	PREDICTED: heat shock 70 kDa protein isoform X2 [Populus euphratica]	60	Populus euphratica	0.3733	0.3035	0.3733	0.0553	0.2858	0.0399	0.2992	0.018	0.3329	89.81	0	Q9LHA8	MED37C	GO:0009607,response to biotic stimulus|GO:0009628,response to abiotic stimulus|GO:0006457,protein folding|GO:0080090,regulation of primary metabolic process|GO:0019222,regulation of metabolic process|GO:0006950,response to stress|GO:0031326,regulation of cellular biosynthetic process|GO:0009266,response to temperature stimulus|GO:0031323,regulation of cellular metabolic process|GO:0000302,respons…	GO:0048046,apoplast|GO:0043229,intracellular organelle|GO:0071944,cell periphery|GO:0043227,membrane-bounded organelle|GO:0043226,organelle|GO:0005737,cytoplasm|GO:0031090,organelle membrane|GO:0005773,vacuole|GO:0005634,nucleus|GO:0016020,membrane|GO:0005739,mitochondrion|GO:0005774,vacuolar membrane|GO:0044437,vacuolar part|GO:0005794,Golgi apparatus|GO:0098588,bounding membrane of organelle|GO…	GO:0044389,ubiquitin-like protein ligase binding|GO:0035639,purine ribonucleoside triphosphate binding|GO:0019899,enzyme binding|GO:0005488,binding|GO:0043167,ion binding|GO:1901363,heterocyclic compound binding|GO:1901265,nucleoside phosphate binding|GO:0001882,nucleoside binding|GO:0043168,anion binding|GO:0000166,nucleotide binding|GO:0001883,purine nucleoside binding|GO:0032549,ribonucleoside…	ath04144,Endocytosis|ath03040,Spliceosome|ath04141,Protein processing in endoplasmic reticulum	http://www.uniprot.org/uniprot/Q9LHA8	FALSE
42	26.99	35.4	52.9	gi|743875087	PREDICTED: glyceraldehyde-3-phosphate dehydrogenase B, chloroplastic isoform X1 [Populus euphratica]	63	Populus euphratica	0.2858	0.0128	0.302	0.0024	0.3467	0.0426	0.3597	0.0083	0.32355	87.86	0	P25857	GAPB	GO:0019685,photosynthesis, dark reaction|GO:0080090,regulation of primary metabolic process|GO:0019222,regulation of metabolic process|GO:0051049,regulation of transport|GO:0006778,porphyrin-containing compound metabolic process|GO:0006779,porphyrin-containing compound biosynthetic process|GO:0009409,response to cold|GO:0015977,carbon fixation|GO:0044281,small molecule metabolic process|GO:000963…	GO:0055035,plastid thylakoid membrane|GO:0034357,photosynthetic membrane|GO:0031976,plastid thylakoid|GO:0031975,envelope|GO:0048046,apoplast|GO:0043229,intracellular organelle|GO:0042170,plastid membrane|GO:0005622,intracellular|GO:0043227,membrane-bounded organelle|GO:0043226,organelle|GO:0009535,chloroplast thylakoid membrane|GO:0009534,chloroplast thylakoid|GO:0031984,organelle subcompartment…	GO:0050662,coenzyme binding|GO:0004365,glyceraldehyde-3-phosphate dehydrogenase (NAD+) (phosphorylating) activity|GO:0051287,NAD binding|GO:1901363,heterocyclic compound binding|GO:0043891,glyceraldehyde-3-phosphate dehydrogenase (NAD(P)+) (phosphorylating) activity|GO:0016620,oxidoreductase activity, acting on the aldehyde or oxo group of donors, NAD or NADP as acceptor|GO:0036094,small molecule…	ath00710,Carbon fixation in photosynthetic organisms|ath01100,Metabolic pathways|ath01200,Carbon metabolism	http://www.uniprot.org/uniprot/P25857	FALSE
1173	2	16.13	55.9	gi|743878102	PREDICTED: glutamine synthetase cytosolic isozyme 2 [Populus euphratica]	41	Populus euphratica	0.2399	0.2807	0.3767	0.3886	0.2559	0.2962	0.4093	0.4169	0.32045	88.76	0	Q56WN1	GLN1-1	GO:0042221,response to chemical|GO:0044238,primary metabolic process|GO:0009399,nitrogen fixation|GO:0044283,small molecule biosynthetic process|GO:0019752,carboxylic acid metabolic process|GO:2001057,reactive nitrogen species metabolic process|GO:0044249,cellular biosynthetic process|GO:0006807,nitrogen compound metabolic process|GO:0044281,small molecule metabolic process|GO:0071941,nitrogen cy…	GO:0022626,cytosolic ribosome|GO:0043229,intracellular organelle|GO:0043228,non-membrane-bounded organelle|GO:0043226,organelle|GO:0030054,cell junction|GO:0005737,cytoplasm|GO:0005618,cell wall|GO:0016020,membrane|GO:0030529,ribonucleoprotein complex|GO:0071944,cell periphery|GO:0030312,external encapsulating structure|GO:0055044,symplast|GO:0005911,cell-cell junction|GO:0005886,plasma membrane|…	GO:0035639,purine ribonucleoside triphosphate binding|GO:0016211,ammonia ligase activity|GO:0016880,acid-ammonia (or amide) ligase activity|GO:0005488,binding|GO:0043167,ion binding|GO:1901363,heterocyclic compound binding|GO:1901265,nucleoside phosphate binding|GO:0001882,nucleoside binding|GO:0043168,anion binding|GO:0043169,cation binding|GO:0046914,transition metal ion binding|GO:0000166,nucl…	ath00630,Glyoxylate and dicarboxylate metabolism|ath00220,Arginine biosynthesis|ath00250,Alanine, aspartate and glutamate metabolism|ath00910,Nitrogen metabolism|ath01230,Biosynthesis of amino acids|ath01100,Metabolic pathways	http://www.uniprot.org/uniprot/Q56WN1	FALSE
20	40.12	42.22	41.6	gi|743879164	PREDICTED: chaperone protein ClpB3, chloroplastic-like [Populus euphratica]	40	Populus euphratica	0.1213	0.0225	0.2489	0.0085	0.1585	0.0571	0.3837	0.0325	0.2281	85.13	0	Q9LF37	CLPB3	GO:0006996,organelle organization|GO:0044238,primary metabolic process|GO:0009628,response to abiotic stimulus|GO:0051604,protein maturation|GO:0009266,response to temperature stimulus|GO:0019538,protein metabolic process|GO:0050896,response to stimulus|GO:0009987,cellular process|GO:0006950,response to stress|GO:0016043,cellular component organization|GO:0043170,macromolecule metabolic process|G…	GO:0005737,cytoplasm|GO:0009536,plastid|GO:0043231,intracellular membrane-bounded organelle|GO:0009532,plastid stroma|GO:0009570,chloroplast stroma|GO:0044464,cell part|GO:0044444,cytoplasmic part|GO:0005623,cell|GO:0005622,intracellular|GO:0044446,intracellular organelle part|GO:0043229,intracellular organelle|GO:0044435,plastid part|GO:0044434,chloroplast part|GO:0044424,intracellular part|GO:0…	GO:0043168,anion binding|GO:0005488,binding|GO:0030554,adenyl nucleotide binding|GO:0035639,purine ribonucleoside triphosphate binding|GO:0097367,carbohydrate derivative binding|GO:1901363,heterocyclic compound binding|GO:1901265,nucleoside phosphate binding|GO:0000166,nucleotide binding|GO:0036094,small molecule binding|GO:0032553,ribonucleotide binding|GO:0032559,adenyl ribonucleotide binding|G…		http://www.uniprot.org/uniprot/Q9LF37	FALSE
89	18.37	18.42	38.5	gi|743879686	PREDICTED: sedoheptulose-1,7-bisphosphatase, chloroplastic [Populus euphratica]	33	Populus euphratica	0.1406	0.133	0.2443	0.2038	0.1259	0.135	0.2355	0.2069	0.186575	80.51	0	P46283	At3g55800	GO:0009595,detection of biotic stimulus|GO:0006520,cellular amino acid metabolic process|GO:0019220,regulation of phosphate metabolic process|GO:0080090,regulation of primary metabolic process|GO:0019222,regulation of metabolic process|GO:0006470,protein dephosphorylation|GO:0048585,negative regulation of response to stimulus|GO:0048583,regulation of response to stimulus|GO:0031348,negative regul…	GO:0031975,envelope|GO:0048046,apoplast|GO:0043229,intracellular organelle|GO:0043227,membrane-bounded organelle|GO:0043226,organelle|GO:0005737,cytoplasm|GO:0009941,chloroplast envelope|GO:0009536,plastid|GO:0009532,plastid stroma|GO:0009570,chloroplast stroma|GO:0044435,plastid part|GO:0044434,chloroplast part|GO:0009579,thylakoid|GO:0031967,organelle envelope|GO:0009507,chloroplast|GO:0009526,…	GO:0050308,sugar-phosphatase activity|GO:0019203,carbohydrate phosphatase activity|GO:0042132,fructose 1,6-bisphosphate 1-phosphatase activity|GO:0016791,phosphatase activity|GO:0016787,hydrolase activity|GO:0043169,cation binding|GO:0016788,hydrolase activity, acting on ester bonds|GO:0043167,ion binding|GO:0042578,phosphoric ester hydrolase activity|GO:0003824,catalytic activity|GO:0005488,bind…	ath00710,Carbon fixation in photosynthetic organisms|ath01100,Metabolic pathways|ath01200,Carbon metabolism	http://www.uniprot.org/uniprot/P46283	FALSE
996	2.1	2.13	18.6	gi|743881832	PREDICTED: ATP synthase subunit b', chloroplastic-like [Populus euphratica]	11	Populus euphratica	0.7178	0.6915	0.2208	0.4063	0.4742	0.6088	0.1675	0.3691	0.395075	82.24	9e-70	Q42139	F10M6.100	GO:0009595,detection of biotic stimulus|GO:0008104,protein localization|GO:0019220,regulation of phosphate metabolic process|GO:0080090,regulation of primary metabolic process|GO:0019222,regulation of metabolic process|GO:0006470,protein dephosphorylation|GO:0048585,negative regulation of response to stimulus|GO:0048583,regulation of response to stimulus|GO:0031348,negative regulation of defense …	GO:0055035,plastid thylakoid membrane|GO:0034357,photosynthetic membrane|GO:0031976,plastid thylakoid|GO:0031975,envelope|GO:0043229,intracellular organelle|GO:0009579,thylakoid|GO:0043227,membrane-bounded organelle|GO:0043226,organelle|GO:0031224,intrinsic component of membrane|GO:0009535,chloroplast thylakoid membrane|GO:0009534,chloroplast thylakoid|GO:0045263,proton-transporting ATP synthase …	GO:0022891,substrate-specific transmembrane transporter activity|GO:0022890,inorganic cation transmembrane transporter activity|GO:0022892,substrate-specific transporter activity|GO:0016787,hydrolase activity|GO:0005215,transporter activity|GO:0008324,cation transmembrane transporter activity|GO:0022857,transmembrane transporter activity|GO:0015075,ion transmembrane transporter activity|GO:000382…	ath00190,Oxidative phosphorylation|ath00195,Photosynthesis|ath01100,Metabolic pathways	http://www.uniprot.org/uniprot/Q42139	FALSE
93	18.09	18.18	50.4	gi|743885735	PREDICTED: ATP synthase gamma chain, chloroplastic [Populus euphratica]	39	Populus euphratica	0.3565	0.1919	0.5012	0.0437	0.3251	0.0466	0.4656	0.0172	0.4121	82.35	0	Q01908	ATPC1	GO:0019220,regulation of phosphate metabolic process|GO:0080090,regulation of primary metabolic process|GO:0019222,regulation of metabolic process|GO:0019682,glyceraldehyde-3-phosphate metabolic process|GO:1901575,organic substance catabolic process|GO:0006778,porphyrin-containing compound metabolic process|GO:0006779,porphyrin-containing compound biosynthetic process|GO:0009694,jasmonic acid met…	GO:0055035,plastid thylakoid membrane|GO:0034357,photosynthetic membrane|GO:0031976,plastid thylakoid|GO:0031975,envelope|GO:0043229,intracellular organelle|GO:0009579,thylakoid|GO:0043227,membrane-bounded organelle|GO:0043226,organelle|GO:0009535,chloroplast thylakoid membrane|GO:0009534,chloroplast thylakoid|GO:0031984,organelle subcompartment|GO:0098807,chloroplast thylakoid membrane protein c…	GO:0036442,hydrogen-exporting ATPase activity|GO:0016887,ATPase activity|GO:0098772,molecular function regulator|GO:0042625,ATPase activity, coupled to transmembrane movement of ions|GO:0042626,ATPase activity, coupled to transmembrane movement of substances|GO:0016820,hydrolase activity, acting on acid anhydrides, catalyzing transmembrane movement of substances|GO:0046933,proton-transporting ATP…	ath00190,Oxidative phosphorylation|ath00195,Photosynthesis|ath01100,Metabolic pathways	http://www.uniprot.org/uniprot/Q01908	FALSE
664	4.02	4.02	7.1	gi|743892318	PREDICTED: homeobox protein knotted-1-like 3 isoform X3 [Populus euphratica]	2	Populus euphratica	0.8241	0.7465	0.3192	0.0122	0.5445	0.2497	0.2228	0.0082	0.47765	49.09	5e-06	P48000	KNAT3	GO:0048856,anatomical structure development|GO:0009593,detection of chemical stimulus|GO:0080090,regulation of primary metabolic process|GO:0019222,regulation of metabolic process|GO:0031326,regulation of cellular biosynthetic process|GO:0031323,regulation of cellular metabolic process|GO:0090304,nucleic acid metabolic process|GO:0044249,cellular biosynthetic process|GO:0034641,cellular nitrogen …	GO:0005737,cytoplasm|GO:0043231,intracellular membrane-bounded organelle|GO:0005829,cytosol|GO:0044464,cell part|GO:0044444,cytoplasmic part|GO:0005623,cell|GO:0043226,organelle|GO:0043229,intracellular organelle|GO:0044424,intracellular part|GO:0005622,intracellular|GO:0043227,membrane-bounded organelle|GO:0005634,nucleus	GO:0003676,nucleic acid binding|GO:0003700,transcription factor activity, sequence-specific DNA binding|GO:0097159,organic cyclic compound binding|GO:0005488,binding|GO:0005515,protein binding|GO:0003677,DNA binding|GO:1901363,heterocyclic compound binding|GO:0001071,nucleic acid binding transcription factor activity		http://www.uniprot.org/uniprot/P48000	FALSE
858	2.69	2.77	32.8	gi|743892624	PREDICTED: uncharacterized protein At2g34160-like [Populus euphratica]	2	Populus euphratica	0.3767	0.3423	0.3133	0.2252	0.5495	0.5393	0.5861	0.3429	0.4564	77.31	2e-59	Q9LP53	F28N24.7		GO:0005737,cytoplasm|GO:0005829,cytosol|GO:0043231,intracellular membrane-bounded organelle|GO:0005634,nucleus|GO:0016020,membrane|GO:0044464,cell part|GO:0044444,cytoplasmic part|GO:0005623,cell|GO:0005622,intracellular|GO:0043229,intracellular organelle|GO:0071944,cell periphery|GO:0005886,plasma membrane|GO:0044424,intracellular part|GO:0043227,membrane-bounded organelle|GO:0043226,organelle	GO:0097159,organic cyclic compound binding|GO:1901363,heterocyclic compound binding|GO:0003676,nucleic acid binding|GO:0005488,binding		http://www.uniprot.org/uniprot/Q9LP53	FALSE
1013	2.07	2.09	8.1	gi|743893961	PREDICTED: inositol monophosphatase 3-like [Populus euphratica]	1	Populus euphratica	0.4831	0.5368	0.2148	0.239	0.6081	0.6476	0.2655	0.2647	0.392875	79.4	4e-157	Q9M8S8	VTC4	GO:0044281,small molecule metabolic process|GO:0044282,small molecule catabolic process|GO:0044283,small molecule biosynthetic process|GO:0019853,L-ascorbic acid biosynthetic process|GO:0019852,L-ascorbic acid metabolic process|GO:0044710,single-organism metabolic process|GO:0044711,single-organism biosynthetic process|GO:0044550,secondary metabolite biosynthetic process|GO:0080167,response to ka…	GO:0005737,cytoplasm|GO:0005829,cytosol|GO:0016020,membrane|GO:0044464,cell part|GO:0005623,cell|GO:0005622,intracellular|GO:0044444,cytoplasmic part|GO:0071944,cell periphery|GO:0005886,plasma membrane|GO:0044424,intracellular part	GO:0050308,sugar-phosphatase activity|GO:0019203,carbohydrate phosphatase activity|GO:0008934,inositol monophosphate 1-phosphatase activity|GO:0016791,phosphatase activity|GO:0016787,hydrolase activity|GO:0043167,ion binding|GO:0043169,cation binding|GO:0042578,phosphoric ester hydrolase activity|GO:0052745,inositol phosphate phosphatase activity|GO:0052834,inositol monophosphate phosphatase acti…	ath00562,Inositol phosphate metabolism|ath00053,Ascorbate and aldarate metabolism|ath04070,Phosphatidylinositol signaling system|ath01100,Metabolic pathways|ath01110,Biosynthesis of secondary metabolites	http://www.uniprot.org/uniprot/Q9M8S8	FALSE
183	11.82	11.88	43.9	gi|743894715	PREDICTED: 50S ribosomal protein L11, chloroplastic [Populus euphratica]	6	Populus euphratica	0.2938	0.2154	0.3162	0.117	0.2911	0.1908	0.3404	0.1041	0.310375	87.91	2e-104	Q9MAP3	RPL11	GO:0006778,porphyrin-containing compound metabolic process|GO:0006779,porphyrin-containing compound biosynthetic process|GO:0061024,membrane organization|GO:0044281,small molecule metabolic process|GO:1901362,organic cyclic compound biosynthetic process|GO:1901360,organic cyclic compound metabolic process|GO:0044710,single-organism metabolic process|GO:0044711,single-organism biosynthetic process…	GO:0022626,cytosolic ribosome|GO:0031975,envelope|GO:0043229,intracellular organelle|GO:0043228,non-membrane-bounded organelle|GO:0043227,membrane-bounded organelle|GO:0043226,organelle|GO:0005737,cytoplasm|GO:0009941,chloroplast envelope|GO:0009536,plastid|GO:0009532,plastid stroma|GO:0009570,chloroplast stroma|GO:0016020,membrane|GO:0030529,ribonucleoprotein complex|GO:0044435,plastid part|GO:0…	GO:0097159,organic cyclic compound binding|GO:0019843,rRNA binding|GO:0003735,structural constituent of ribosome|GO:0003723,RNA binding|GO:0003676,nucleic acid binding|GO:0005198,structural molecule activity|GO:1901363,heterocyclic compound binding|GO:0005488,binding	ath03010,Ribosome	http://www.uniprot.org/uniprot/Q9MAP3	FALSE
100	17.1	17.14	42.2	gi|743894862	PREDICTED: magnesium-protoporphyrin IX monomethyl ester [oxidative] cyclase, chloroplastic [Populus euphratica]	14	1.10407e+07	0.3908	0.001	0.1786	0.0015	0.5346	0.01	0.2312	0.0015	0.3338	85.12	0	Q9M591	CRD1	GO:0080090,regulation of primary metabolic process|GO:0019222,regulation of metabolic process|GO:0006778,porphyrin-containing compound metabolic process|GO:0006779,porphyrin-containing compound biosynthetic process|GO:0061024,membrane organization|GO:0044281,small molecule metabolic process|GO:0044283,small molecule biosynthetic process|GO:1901576,organic substance biosynthetic process|GO:1901362…	GO:0055035,plastid thylakoid membrane|GO:0019866,organelle inner membrane|GO:0034357,photosynthetic membrane|GO:0031976,plastid thylakoid|GO:0031975,envelope|GO:0043229,intracellular organelle|GO:0042170,plastid membrane|GO:0005623,cell|GO:0005622,intracellular|GO:0043227,membrane-bounded organelle|GO:0043226,organelle|GO:0009535,chloroplast thylakoid membrane|GO:0009534,chloroplast thylakoid|GO:…	GO:0043169,cation binding|GO:0004497,monooxygenase activity|GO:0005515,protein binding|GO:0016709,oxidoreductase activity, acting on paired donors, with incorporation or reduction of molecular oxygen, NAD(P)H as one donor, and incorporation of one atom of oxygen|GO:0097159,organic cyclic compound binding|GO:0016705,oxidoreductase activity, acting on paired donors, with incorporation or reduction …	ath00860,Porphyrin and chlorophyll metabolism|ath01110,Biosynthesis of secondary metabolites|ath01100,Metabolic pathways	http://www.uniprot.org/uniprot/Q9M591	FALSE
342	8	8.02	38.3	gi|743895424	PREDICTED: chlorophyll a-b binding protein 6, chloroplastic-like [Populus euphratica]	9	Populus euphratica	0.2228	0.3613	0.5395	0.4098	0.2249	0.3864	0.5754	0.4412	0.39065	81.17	9e-139	Q01667	LHCA1	GO:0009628,response to abiotic stimulus|GO:0051049,regulation of transport|GO:0009637,response to blue light|GO:0090304,nucleic acid metabolic process|GO:0034641,cellular nitrogen compound metabolic process|GO:0006807,nitrogen compound metabolic process|GO:1901360,organic cyclic compound metabolic process|GO:0009639,response to red or far red light|GO:0042221,response to chemical|GO:0034660,ncRNA…	GO:0055035,plastid thylakoid membrane|GO:0034357,photosynthetic membrane|GO:0031976,plastid thylakoid|GO:0031975,envelope|GO:0043229,intracellular organelle|GO:0009579,thylakoid|GO:0043227,membrane-bounded organelle|GO:0043226,organelle|GO:0031224,intrinsic component of membrane|GO:0009535,chloroplast thylakoid membrane|GO:0009534,chloroplast thylakoid|GO:0031984,organelle subcompartment|GO:00095…	GO:0043169,cation binding|GO:0016168,chlorophyll binding|GO:0046906,tetrapyrrole binding|GO:0097159,organic cyclic compound binding|GO:0043167,ion binding|GO:0005488,binding|GO:0046872,metal ion binding|GO:1901363,heterocyclic compound binding	ath00196,Photosynthesis - antenna proteins	http://www.uniprot.org/uniprot/Q01667	FALSE
95	17.73	17.78	46.1	gi|743895899	PREDICTED: catalase isozyme 1 [Populus euphratica]	28	Populus euphratica	0.4656	0.6611	0.3981	0.6464	0.3597	0.6026	0.3133	0.5896	0.384175	89.02	0	P25819	CAT2	GO:0019725,cellular homeostasis|GO:0009991,response to extracellular stimulus|GO:0009628,response to abiotic stimulus|GO:0008152,metabolic process|GO:0009314,response to radiation|GO:0009648,photoperiodism|GO:0031667,response to nutrient levels|GO:0042592,homeostatic process|GO:0042744,hydrogen peroxide catabolic process|GO:0042743,hydrogen peroxide metabolic process|GO:0042594,response to starva…	GO:0022626,cytosolic ribosome|GO:0031975,envelope|GO:0042579,microbody|GO:0043229,intracellular organelle|GO:0043228,non-membrane-bounded organelle|GO:0009514,glyoxysome|GO:0043227,membrane-bounded organelle|GO:0043226,organelle|GO:0005737,cytoplasm|GO:0009536,plastid|GO:0010319,stromule|GO:0005777,peroxisome|GO:0005739,mitochondrion|GO:0030529,ribonucleoprotein complex|GO:0044435,plastid part|GO…	GO:0043169,cation binding|GO:0043167,ion binding|GO:0046872,metal ion binding|GO:0046914,transition metal ion binding|GO:0020037,heme binding|GO:0046906,tetrapyrrole binding|GO:0097159,organic cyclic compound binding|GO:0016209,antioxidant activity|GO:0050897,cobalt ion binding|GO:1901363,heterocyclic compound binding|GO:0003824,catalytic activity|GO:0005488,binding|GO:0005515,protein binding|GO:…	ath00630,Glyoxylate and dicarboxylate metabolism|ath04146,Peroxisome|ath01110,Biosynthesis of secondary metabolites|ath00380,Tryptophan metabolism|ath01200,Carbon metabolism	http://www.uniprot.org/uniprot/P25819	FALSE
66	20.55	20.57	66.6	gi|743906507	PREDICTED: glycerate dehydrogenase [Populus euphratica]	36	Populus euphratica	0.4446	0.6702	0.4285	0.4314	0.3698	0.4734	0.3373	0.1036	0.39505	89.64	0	Q9C9W5	HPR	GO:0042221,response to chemical|GO:0009991,response to extracellular stimulus|GO:0071482,cellular response to light stimulus|GO:0009414,response to water deprivation|GO:0009314,response to radiation|GO:0071229,cellular response to acid chemical|GO:0044249,cellular biosynthetic process|GO:0009416,response to light stimulus|GO:0070887,cellular response to chemical stimulus|GO:0009415,response to wa…	GO:0005737,cytoplasm|GO:0043231,intracellular membrane-bounded organelle|GO:0044464,cell part|GO:0005777,peroxisome|GO:0044444,cytoplasmic part|GO:0005623,cell|GO:0005622,intracellular|GO:0042579,microbody|GO:0043229,intracellular organelle|GO:0044424,intracellular part|GO:0043227,membrane-bounded organelle|GO:0043226,organelle	GO:0050662,coenzyme binding|GO:0016614,oxidoreductase activity, acting on CH-OH group of donors|GO:0016616,oxidoreductase activity, acting on the CH-OH group of donors, NAD or NADP as acceptor|GO:0051287,NAD binding|GO:1901363,heterocyclic compound binding|GO:0000166,nucleotide binding|GO:0036094,small molecule binding|GO:0003824,catalytic activity|GO:0048037,cofactor binding|GO:0005488,binding|G…	ath00630,Glyoxylate and dicarboxylate metabolism|ath01110,Biosynthesis of secondary metabolites|ath00260,Glycine, serine and threonine metabolism|ath01100,Metabolic pathways|ath01200,Carbon metabolism	http://www.uniprot.org/uniprot/Q9C9W5	FALSE
393	6.84	6.89	22.6	gi|743907373	PREDICTED: 40S ribosomal protein S5-like [Populus euphratica]	9	Populus euphratica	0.5012	0.8822	0.3048	0.7506	0.6607	0.6936	0.3802	0.5911	0.461725	89.01	5e-126	P51427	RPS5B	GO:0044249,cellular biosynthetic process|GO:0034641,cellular nitrogen compound metabolic process|GO:0006807,nitrogen compound metabolic process|GO:0034645,cellular macromolecule biosynthetic process|GO:1901576,organic substance biosynthetic process|GO:0044267,cellular protein metabolic process|GO:0044260,cellular macromolecule metabolic process|GO:0043043,peptide biosynthetic process|GO:0071704,o…	GO:0022626,cytosolic ribosome|GO:0015935,small ribosomal subunit|GO:0043229,intracellular organelle|GO:0043228,non-membrane-bounded organelle|GO:0043227,membrane-bounded organelle|GO:0043226,organelle|GO:0030054,cell junction|GO:0005737,cytoplasm|GO:0009536,plastid|GO:0005773,vacuole|GO:0016020,membrane|GO:0030529,ribonucleoprotein complex|GO:0009507,chloroplast|GO:0071944,cell periphery|GO:00443…	GO:0097159,organic cyclic compound binding|GO:0005198,structural molecule activity|GO:0003735,structural constituent of ribosome|GO:0003723,RNA binding|GO:0003676,nucleic acid binding|GO:1901363,heterocyclic compound binding|GO:0005488,binding	ath03010,Ribosome	http://www.uniprot.org/uniprot/P51427	FALSE
301	8.6	8.63	42.7	gi|743907505	PREDICTED: ribulose-phosphate 3-epimerase, chloroplastic [Populus euphratica]	25	Populus euphratica	0.3908	0.1599	0.2729	0.0843	0.4207	0.4948	0.3133	0.2038	0.349425	84.97	3e-177	Q9SAU2	RPE	GO:0019321,pentose metabolic process|GO:0009607,response to biotic stimulus|GO:0019323,pentose catabolic process|GO:0006739,NADP metabolic process|GO:0046365,monosaccharide catabolic process|GO:0006733,oxidoreduction coenzyme metabolic process|GO:0044723,single-organism carbohydrate metabolic process|GO:0034641,cellular nitrogen compound metabolic process|GO:0006098,pentose-phosphate shunt|GO:004…	GO:0031975,envelope|GO:0048046,apoplast|GO:0043229,intracellular organelle|GO:0043227,membrane-bounded organelle|GO:0043226,organelle|GO:0005737,cytoplasm|GO:0009941,chloroplast envelope|GO:0009536,plastid|GO:0009532,plastid stroma|GO:0009570,chloroplast stroma|GO:0010319,stromule|GO:0044435,plastid part|GO:0044434,chloroplast part|GO:0009579,thylakoid|GO:0031967,organelle envelope|GO:0009507,chl…	GO:0016857,racemase and epimerase activity, acting on carbohydrates and derivatives|GO:0016854,racemase and epimerase activity|GO:0016853,isomerase activity|GO:0043169,cation binding|GO:0043167,ion binding|GO:0003824,catalytic activity|GO:0005488,binding|GO:0004750,ribulose-phosphate 3-epimerase activity|GO:0046872,metal ion binding	ath00030,Pentose phosphate pathway|ath00710,Carbon fixation in photosynthetic organisms|ath01230,Biosynthesis of amino acids|ath00040,Pentose and glucuronate interconversions|ath01200,Carbon metabolism|ath01110,Biosynthesis of secondary metabolites|ath01100,Metabolic pathways	http://www.uniprot.org/uniprot/Q9SAU2	FALSE
452	6.03	11.67	25.4	gi|743907790	PREDICTED: isocitrate dehydrogenase [NADP] [Populus euphratica]	8	NADP	0.4246	0.3082	0.5346	0.4472	0.3802	0.2169	0.5248	0.3058	0.46605	80.83	0	Q8LPJ5	At5g14590	GO:0019752,carboxylic acid metabolic process|GO:0006099,tricarboxylic acid cycle|GO:0009060,aerobic respiration|GO:0044281,small molecule metabolic process|GO:0006091,generation of precursor metabolites and energy|GO:0072350,tricarboxylic acid metabolic process|GO:0044699,single-organism process|GO:0044710,single-organism metabolic process|GO:0071704,organic substance metabolic process|GO:0045333…	GO:0031976,plastid thylakoid|GO:0043229,intracellular organelle|GO:0043227,membrane-bounded organelle|GO:0043226,organelle|GO:0009579,thylakoid|GO:0009534,chloroplast thylakoid|GO:0031984,organelle subcompartment|GO:0009532,plastid stroma|GO:0009570,chloroplast stroma|GO:0005739,mitochondrion|GO:0044435,plastid part|GO:0044434,chloroplast part|GO:0005737,cytoplasm|GO:0009536,plastid|GO:0009507,ch…	GO:0043169,cation binding|GO:0043167,ion binding|GO:0016614,oxidoreductase activity, acting on CH-OH group of donors|GO:0016616,oxidoreductase activity, acting on the CH-OH group of donors, NAD or NADP as acceptor|GO:0003824,catalytic activity|GO:0051287,NAD binding|GO:0000287,magnesium ion binding|GO:0036094,small molecule binding|GO:0000166,nucleotide binding|GO:0050662,coenzyme binding|GO:0004…	ath00020,Citrate cycle (TCA cycle)|ath01230,Biosynthesis of amino acids|ath04146,Peroxisome|ath01210,2-Oxocarboxylic acid metabolism|ath00480,Glutathione metabolism|ath01200,Carbon metabolism|ath01110,Biosynthesis of secondary metabolites|ath01100,Metabolic pathways	http://www.uniprot.org/uniprot/Q8LPJ5	FALSE
1257	2	2.01	12.3	gi|743910102	PREDICTED: aquaporin PIP2-1-like [Populus euphratica]	3	Populus euphratica	0.3597	0.4302	0.4699	0.602	0.4018	0.5711	0.5058	0.8305	0.4343	82.81	2e-175	P43287	PIP2-2	GO:0009992,cellular water homeostasis|GO:0015850,organic hydroxy compound transport|GO:0006950,response to stress|GO:0042592,homeostatic process|GO:0009414,response to water deprivation|GO:0009415,response to water|GO:0051179,localization|GO:0090066,regulation of anatomical structure size|GO:0044699,single-organism process|GO:0009719,response to endogenous stimulus|GO:0010035,response to inorgani…	GO:0005887,integral component of plasma membrane|GO:0043229,intracellular organelle|GO:0071944,cell periphery|GO:0031226,intrinsic component of plasma membrane|GO:0043226,organelle|GO:0031224,intrinsic component of membrane|GO:0005737,cytoplasm|GO:0009536,plastid|GO:0005773,vacuole|GO:0043227,membrane-bounded organelle|GO:0016021,integral component of membrane|GO:0016020,membrane|GO:0030054,cell …	GO:0022891,substrate-specific transmembrane transporter activity|GO:0022838,substrate-specific channel activity|GO:0022857,transmembrane transporter activity|GO:1901476,carbohydrate transporter activity|GO:0005215,transporter activity|GO:0015665,alcohol transmembrane transporter activity|GO:0015144,carbohydrate transmembrane transporter activity|GO:0015250,water channel activity|GO:1901618,organi…		http://www.uniprot.org/uniprot/P43287	FALSE
857	2.69	9.26	58.8	gi|743912840	PREDICTED: fructose-bisphosphate aldolase, cytoplasmic isozyme 1-like [Populus euphratica]	25	Populus euphratica	0.15	0.2482	0.4656	0.4659	0.1754	0.3338	0.5395	0.7531	0.332625	87.71	0	O65581	M3E9.40	GO:0009167,purine ribonucleoside monophosphate metabolic process|GO:0044281,small molecule metabolic process|GO:0009161,ribonucleoside monophosphate metabolic process|GO:1901360,organic cyclic compound metabolic process|GO:0044712,single-organism catabolic process|GO:0044710,single-organism metabolic process|GO:0044711,single-organism biosynthetic process|GO:0042440,pigment metabolic process|GO:0…	GO:0005737,cytoplasm|GO:0009536,plastid|GO:0043231,intracellular membrane-bounded organelle|GO:0044464,cell part|GO:0044444,cytoplasmic part|GO:0005623,cell|GO:0005622,intracellular|GO:0043229,intracellular organelle|GO:0044424,intracellular part|GO:0043227,membrane-bounded organelle|GO:0043226,organelle|GO:0009507,chloroplast	GO:0016829,lyase activity|GO:0016830,carbon-carbon lyase activity|GO:0016832,aldehyde-lyase activity|GO:0003824,catalytic activity|GO:0004332,fructose-bisphosphate aldolase activity	ath00030,Pentose phosphate pathway|ath00710,Carbon fixation in photosynthetic organisms|ath00010,Glycolysis / Gluconeogenesis|ath00051,Fructose and mannose metabolism|ath01230,Biosynthesis of amino acids|ath01200,Carbon metabolism|ath01110,Biosynthesis of secondary metabolites|ath01100,Metabolic pathways	http://www.uniprot.org/uniprot/O65581	FALSE
1062	2.03	2.04	10.5	gi|743913712	PREDICTED: glycine-rich RNA-binding protein 4, mitochondrial isoform X1 [Populus euphratica]	1	Populus euphratica	0.2312	0.5884	0.7798	0.7566	0.1406	0.4929	0.4529	0.6243	0.401125	74.71	7e-42	Q9FX45	T9L24.48		GO:0005737,cytoplasm|GO:0009536,plastid|GO:0043231,intracellular membrane-bounded organelle|GO:0044464,cell part|GO:0044444,cytoplasmic part|GO:0005623,cell|GO:0005622,intracellular|GO:0043229,intracellular organelle|GO:0044424,intracellular part|GO:0043227,membrane-bounded organelle|GO:0043226,organelle|GO:0009507,chloroplast	GO:0097159,organic cyclic compound binding|GO:0000166,nucleotide binding|GO:0036094,small molecule binding|GO:0005488,binding|GO:0003676,nucleic acid binding|GO:1901363,heterocyclic compound binding|GO:1901265,nucleoside phosphate binding		http://www.uniprot.org/uniprot/Q9FX45	FALSE
720	4	4	22.3	gi|743914435	PREDICTED: uncharacterized protein LOC105108514 [Populus euphratica]	3	Populus euphratica	0.4406	0.2767	0.4966	0.3162	0.4571	0.2964	0.52	0.3416	0.478575	59.46	2e-48	Q8W1B3	PRIP		GO:0005737,cytoplasm|GO:0009536,plastid|GO:0043231,intracellular membrane-bounded organelle|GO:0009532,plastid stroma|GO:0009570,chloroplast stroma|GO:0044464,cell part|GO:0044444,cytoplasmic part|GO:0005623,cell|GO:0005622,intracellular|GO:0044446,intracellular organelle part|GO:0043229,intracellular organelle|GO:0044435,plastid part|GO:0044434,chloroplast part|GO:0044424,intracellular part|GO:0…			http://www.uniprot.org/uniprot/Q8W1B3	FALSE
663	4.02	4.02	27.5	gi|743916300	PREDICTED: chlorophyll a-b binding protein 7, chloroplastic [Populus euphratica]	10	Populus euphratica	0.2884	0.3571	0.2291	0.3194	0.3192	0.3987	0.2512	0.3532	0.271975	87.17	1e-144	Q9SYW8	Lhca2	GO:0044267,cellular protein metabolic process|GO:0044260,cellular macromolecule metabolic process|GO:0044238,primary metabolic process|GO:0019538,protein metabolic process|GO:0044237,cellular metabolic process|GO:0019684,photosynthesis, light reaction|GO:0009987,cellular process|GO:0006464,cellular protein modification process|GO:0015979,photosynthesis|GO:0071704,organic substance metabolic proce…	GO:0055035,plastid thylakoid membrane|GO:0034357,photosynthetic membrane|GO:0031976,plastid thylakoid|GO:0043229,intracellular organelle|GO:0005622,intracellular|GO:0043227,membrane-bounded organelle|GO:0043226,organelle|GO:0031224,intrinsic component of membrane|GO:0009535,chloroplast thylakoid membrane|GO:0009534,chloroplast thylakoid|GO:0031984,organelle subcompartment|GO:0016021,integral comp…	GO:0043169,cation binding|GO:0016168,chlorophyll binding|GO:0046906,tetrapyrrole binding|GO:0097159,organic cyclic compound binding|GO:0043167,ion binding|GO:0005488,binding|GO:0046872,metal ion binding|GO:1901363,heterocyclic compound binding	ath00196,Photosynthesis - antenna proteins	http://www.uniprot.org/uniprot/Q9SYW8	FALSE
1480	1.72	1.96	15.3	gi|743916576	PREDICTED: probable prefoldin subunit 5 isoform X2 [Populus euphratica]	2	Populus euphratica	0.3698	0.4881	0.1318	0.5182	0.2754	0.3305	0.1038	0.3457	0.2202	78.95	6e-60	P57742	At5g23290	GO:0044267,cellular protein metabolic process|GO:0006457,protein folding|GO:0044260,cellular macromolecule metabolic process|GO:0044238,primary metabolic process|GO:0019538,protein metabolic process|GO:0009987,cellular process|GO:0044237,cellular metabolic process|GO:0043170,macromolecule metabolic process|GO:0071704,organic substance metabolic process|GO:0008152,metabolic process	GO:0043234,protein complex|GO:0005737,cytoplasm|GO:0032991,macromolecular complex|GO:0005829,cytosol|GO:0044464,cell part|GO:0005623,cell|GO:0005622,intracellular|GO:0044444,cytoplasmic part|GO:0044424,intracellular part|GO:0016272,prefoldin complex	GO:0005515,protein binding|GO:0051082,unfolded protein binding|GO:0005488,binding		http://www.uniprot.org/uniprot/P57742	FALSE
875	2.57	32.43	63.9	gi|743917295	PREDICTED: ribulose bisphosphate carboxylase/oxygenase activase, chloroplastic isoform X1 [Populus euphratica]	85	Populus euphratica	0.169	0.0343	0.1629	0.0545	0.2249	0.0317	0.2291	0.0483	0.196475	24.62	3e-06	Q9SEI3	RPT4A	GO:0080090,regulation of primary metabolic process|GO:0019222,regulation of metabolic process|GO:1901362,organic cyclic compound biosynthetic process|GO:0071840,cellular component organization or biogenesis|GO:0044712,single-organism catabolic process|GO:0044710,single-organism metabolic process|GO:0010604,positive regulation of macromolecule metabolic process|GO:0048518,positive regulation of bi…	GO:0031974,membrane-enclosed lumen|GO:0031595,nuclear proteasome complex|GO:0043229,intracellular organelle|GO:0031597,cytosolic proteasome complex|GO:0043227,membrane-bounded organelle|GO:0043226,organelle|GO:0005737,cytoplasm|GO:0031981,nuclear lumen|GO:0005618,cell wall|GO:0005634,nucleus|GO:0071944,cell periphery|GO:0030312,external encapsulating structure|GO:0000502,proteasome complex|GO:004…	GO:0036402,proteasome-activating ATPase activity|GO:0035639,purine ribonucleoside triphosphate binding|GO:0017025,TBP-class protein binding|GO:0005488,binding|GO:0016887,ATPase activity|GO:0043167,ion binding|GO:1901363,heterocyclic compound binding|GO:1901265,nucleoside phosphate binding|GO:0001882,nucleoside binding|GO:0043168,anion binding|GO:0042623,ATPase activity, coupled|GO:0000166,nucleot…	ath03050,Proteasome	http://www.uniprot.org/uniprot/Q9SEI3	FALSE
1354	2	2	4	gi|743920325	PREDICTED: uncharacterized protein LOC105110752 [Populus euphratica]	1	Populus euphratica	0.5649	0.7797	0.3404	0.6214	0.5395	0.7196	0.3221	0.5755	0.441725	67.86	2e-57	Q8VXY0	At2g36145	GO:0006739,NADP metabolic process|GO:0009893,positive regulation of metabolic process|GO:0019222,regulation of metabolic process|GO:0006732,coenzyme metabolic process|GO:0005984,disaccharide metabolic process|GO:0009311,oligosaccharide metabolic process|GO:0006807,nitrogen compound metabolic process|GO:0044249,cellular biosynthetic process|GO:0034641,cellular nitrogen compound metabolic process|G…	GO:0055035,plastid thylakoid membrane|GO:0034357,photosynthetic membrane|GO:0031976,plastid thylakoid|GO:0043229,intracellular organelle|GO:0005622,intracellular|GO:0043227,membrane-bounded organelle|GO:0043226,organelle|GO:0009535,chloroplast thylakoid membrane|GO:0009534,chloroplast thylakoid|GO:0031984,organelle subcompartment|GO:0009532,plastid stroma|GO:0009570,chloroplast stroma|GO:0016020,…			http://www.uniprot.org/uniprot/Q8VXY0	FALSE
538	4.98	29.95	61.8	gi|743920648	PREDICTED: actin-7-like isoform X1 [Populus euphratica]	37	Populus euphratica	0.3105	0.5659	0.5395	0.5731	0.3698	0.4848	0.6368	0.491	0.46415	98.14	0	P53492	ACT7	GO:0022622,root system development|GO:0008104,protein localization|GO:0048589,developmental growth|GO:0048588,developmental cell growth|GO:0048468,cell development|GO:0048469,cell maturation|GO:0071840,cellular component organization or biogenesis|GO:0044712,single-organism catabolic process|GO:0044710,single-organism metabolic process|GO:0044711,single-organism biosynthetic process|GO:0048869,ce…	GO:0031974,membrane-enclosed lumen|GO:0031975,envelope|GO:0043229,intracellular organelle|GO:0043228,non-membrane-bounded organelle|GO:0043227,membrane-bounded organelle|GO:0043226,organelle|GO:0030054,cell junction|GO:0005856,cytoskeleton|GO:0009941,chloroplast envelope|GO:0009536,plastid|GO:0031981,nuclear lumen|GO:0005730,nucleolus|GO:0005618,cell wall|GO:0009570,chloroplast stroma|GO:0005634,…	GO:0005200,structural constituent of cytoskeleton|GO:0035639,purine ribonucleoside triphosphate binding|GO:0005488,binding|GO:0005198,structural molecule activity|GO:1901363,heterocyclic compound binding|GO:1901265,nucleoside phosphate binding|GO:0001882,nucleoside binding|GO:0043168,anion binding|GO:0043167,ion binding|GO:0001883,purine nucleoside binding|GO:0032549,ribonucleoside binding|GO:001…		http://www.uniprot.org/uniprot/P53492	FALSE
41	27.07	27.08	68.9	gi|743921083	PREDICTED: oxygen-evolving enhancer protein 1, chloroplastic [Populus euphratica]	83	Populus euphratica	0.1067	0.011	0.1259	0.0115	0.1038	0.0142	0.1282	0.0148	0.11615	80.66	0	Q9S841	PSBO2	GO:0008104,protein localization|GO:0019220,regulation of phosphate metabolic process|GO:0080090,regulation of primary metabolic process|GO:0019222,regulation of metabolic process|GO:0019682,glyceraldehyde-3-phosphate metabolic process|GO:0048585,negative regulation of response to stimulus|GO:0051667,establishment of plastid localization|GO:0048583,regulation of response to stimulus|GO:0031348,neg…	GO:0055035,plastid thylakoid membrane|GO:0034357,photosynthetic membrane|GO:0031976,plastid thylakoid|GO:0031977,thylakoid lumen|GO:0019898,extrinsic component of membrane|GO:0043229,intracellular organelle|GO:0005622,intracellular|GO:0009654,photosystem II oxygen evolving complex|GO:0043226,organelle|GO:0031224,intrinsic component of membrane|GO:0009535,chloroplast thylakoid membrane|GO:0009534,…	GO:0005488,binding|GO:0043169,cation binding|GO:0005515,protein binding|GO:0097159,organic cyclic compound binding|GO:0043167,ion binding|GO:0008266,poly(U) RNA binding|GO:0003727,single-stranded RNA binding|GO:0003723,RNA binding|GO:0003676,nucleic acid binding|GO:0008187,poly-pyrimidine tract binding|GO:0046872,metal ion binding|GO:1901363,heterocyclic compound binding|GO:0005509,calcium ion bi…	ath00195,Photosynthesis|ath01100,Metabolic pathways	http://www.uniprot.org/uniprot/Q9S841	FALSE
1128	2.01	2.01	15.9	gi|743921364	PREDICTED: monothiol glutaredoxin-S16, chloroplastic [Populus euphratica]	4	Populus euphratica	0.3133	0.3987	0.2965	0.4034	0.5702	0.7248	0.5297	0.736	0.427425	67.46	1e-138	Q8H7F6	GRXS16	GO:0048443,stamen development|GO:0048466,androecium development|GO:0048569,post-embryonic organ development|GO:0009791,post-embryonic development|GO:0032502,developmental process|GO:0007275,multicellular organismal development|GO:0044699,single-organism process|GO:0044710,single-organism metabolic process|GO:0050789,regulation of biological process|GO:0048437,floral organ development|GO:0061458,r…	GO:0005737,cytoplasm|GO:0009536,plastid|GO:0043231,intracellular membrane-bounded organelle|GO:0009532,plastid stroma|GO:0009570,chloroplast stroma|GO:0044464,cell part|GO:0044444,cytoplasmic part|GO:0005623,cell|GO:0005622,intracellular|GO:0044446,intracellular organelle part|GO:0043229,intracellular organelle|GO:0044435,plastid part|GO:0044434,chloroplast part|GO:0044424,intracellular part|GO:0…	GO:0016787,hydrolase activity|GO:0046872,metal ion binding|GO:0009055,electron carrier activity|GO:0051540,metal cluster binding|GO:0043169,cation binding|GO:0051536,iron-sulfur cluster binding|GO:0051537,2 iron, 2 sulfur cluster binding|GO:0043167,ion binding|GO:0003824,catalytic activity|GO:0005488,binding|GO:0016667,oxidoreductase activity, acting on a sulfur group of donors|GO:0015036,disulfi…		http://www.uniprot.org/uniprot/Q8H7F6	FALSE
1305	2	2	9.4	gi|743926119	PREDICTED: uncharacterized protein LOC105112966 isoform X4 [Populus euphratica]	1	Populus euphratica	0.3404	0.2236	0.2512	0.1767	0.7311	0.5805	0.5395	0.3636	0.46555	68.64	1e-78	Q8GUP2	At1g16445	GO:0032259,methylation|GO:0008152,metabolic process	GO:0005737,cytoplasm|GO:0009536,plastid|GO:0043231,intracellular membrane-bounded organelle|GO:0044464,cell part|GO:0044444,cytoplasmic part|GO:0005623,cell|GO:0005622,intracellular|GO:0043229,intracellular organelle|GO:0044424,intracellular part|GO:0043227,membrane-bounded organelle|GO:0043226,organelle|GO:0009507,chloroplast	GO:0008168,methyltransferase activity|GO:0016740,transferase activity|GO:0016741,transferase activity, transferring one-carbon groups|GO:0003824,catalytic activity		http://www.uniprot.org/uniprot/Q8GUP2	FALSE
58	23.11	25.22	35.6	gi|743926242	PREDICTED: chaperone protein ClpB1 [Populus euphratica]	24	Populus euphratica	0.2377	0.1413	0.2249	0.1814	0.2512	0.1476	0.2188	0.1902	0.23315	87.11	0	P42730	CLPB1	GO:0034250,positive regulation of cellular amide metabolic process|GO:0010035,response to inorganic substance|GO:0009628,response to abiotic stimulus|GO:0006457,protein folding|GO:0080090,regulation of primary metabolic process|GO:0019222,regulation of metabolic process|GO:0009891,positive regulation of biosynthetic process|GO:0051246,regulation of protein metabolic process|GO:0031325,positive re…	GO:0031975,envelope|GO:0043229,intracellular organelle|GO:0043227,membrane-bounded organelle|GO:0043226,organelle|GO:0005737,cytoplasm|GO:0009941,chloroplast envelope|GO:0009536,plastid|GO:0009532,plastid stroma|GO:0009570,chloroplast stroma|GO:0005634,nucleus|GO:0044435,plastid part|GO:0044434,chloroplast part|GO:0031967,organelle envelope|GO:0009507,chloroplast|GO:0009526,plastid envelope|GO:00…	GO:0035639,purine ribonucleoside triphosphate binding|GO:0005488,binding|GO:0043167,ion binding|GO:1901363,heterocyclic compound binding|GO:1901265,nucleoside phosphate binding|GO:0001882,nucleoside binding|GO:0043168,anion binding|GO:0000166,nucleotide binding|GO:0001883,purine nucleoside binding|GO:0032549,ribonucleoside binding|GO:0017076,purine nucleotide binding|GO:0005524,ATP binding|GO:003…		http://www.uniprot.org/uniprot/P42730	FALSE
194	11.34	11.39	43.6	gi|743928007	PREDICTED: chlorophyll a-b binding protein 8, chloroplastic [Populus euphratica]	32	Populus euphratica	0.2606	0.0926	0.138	0.0878	0.4093	0.151	0.2168	0.1416	0.256175	85.09	4e-126	Q9SY97	T25B24.12	GO:0009735,response to cytokinin|GO:0019752,carboxylic acid metabolic process|GO:0044249,cellular biosynthetic process|GO:0006807,nitrogen compound metabolic process|GO:0044281,small molecule metabolic process|GO:0044283,small molecule biosynthetic process|GO:1901576,organic substance biosynthetic process|GO:0009069,serine family amino acid metabolic process|GO:0015979,photosynthesis|GO:0044699,s…	GO:0055035,plastid thylakoid membrane|GO:0034357,photosynthetic membrane|GO:0031976,plastid thylakoid|GO:0043229,intracellular organelle|GO:0005622,intracellular|GO:0043227,membrane-bounded organelle|GO:0043226,organelle|GO:0031224,intrinsic component of membrane|GO:0009535,chloroplast thylakoid membrane|GO:0009534,chloroplast thylakoid|GO:0031984,organelle subcompartment|GO:0009532,plastid strom…	GO:0043169,cation binding|GO:0016168,chlorophyll binding|GO:0046906,tetrapyrrole binding|GO:0097159,organic cyclic compound binding|GO:0043167,ion binding|GO:0005488,binding|GO:0046872,metal ion binding|GO:1901363,heterocyclic compound binding	ath00196,Photosynthesis - antenna proteins	http://www.uniprot.org/uniprot/Q9SY97	FALSE
493	5.62	5.78	22.6	gi|743928577	PREDICTED: uncharacterized protein LOC105113849 [Populus euphratica]	4	Populus euphratica	0.597	0.3401	0.4742	0.2705	0.4613	0.3356	0.3192	0.2671	0.462925	31.25	0.48	Q9FX85	PER10	GO:0044712,single-organism catabolic process|GO:0044710,single-organism metabolic process|GO:0044237,cellular metabolic process|GO:0050896,response to stimulus|GO:0009987,cellular process|GO:0072593,reactive oxygen species metabolic process|GO:0044248,cellular catabolic process|GO:0006950,response to stress|GO:0042744,hydrogen peroxide catabolic process|GO:0044763,single-organism cellular process…	GO:0005576,extracellular region	GO:0043169,cation binding|GO:0046872,metal ion binding|GO:0020037,heme binding|GO:0046906,tetrapyrrole binding|GO:0097159,organic cyclic compound binding|GO:0016209,antioxidant activity|GO:0043167,ion binding|GO:1901363,heterocyclic compound binding|GO:0003824,catalytic activity|GO:0005488,binding|GO:0016684,oxidoreductase activity, acting on peroxide as acceptor|GO:0004601,peroxidase activity|GO…	ath00940,Phenylpropanoid biosynthesis|ath01100,Metabolic pathways|ath01110,Biosynthesis of secondary metabolites	http://www.uniprot.org/uniprot/Q9FX85	FALSE
1534	1.43	1.9	15.6	gi|743928583	PREDICTED: NAD(P)H-quinone oxidoreductase subunit N, organellar chromatophore [Populus euphratica]	3	Populus euphratica	0.5248	0.4393	0.227	0.4442	0.4246	0.3843	0.1854	0.3881	0.34045	71.35	4e-95	Q9LVM2	ndhN	GO:0019222,regulation of metabolic process|GO:0009451,RNA modification|GO:0044281,small molecule metabolic process|GO:0015979,photosynthesis|GO:0071840,cellular component organization or biogenesis|GO:0044710,single-organism metabolic process|GO:0044711,single-organism biosynthetic process|GO:0042440,pigment metabolic process|GO:0043207,response to external biotic stimulus|GO:0010257,NADH dehydro…	GO:0055035,plastid thylakoid membrane|GO:0034357,photosynthetic membrane|GO:0031976,plastid thylakoid|GO:0031975,envelope|GO:0043229,intracellular organelle|GO:0009579,thylakoid|GO:0043227,membrane-bounded organelle|GO:0043226,organelle|GO:0009535,chloroplast thylakoid membrane|GO:0009534,chloroplast thylakoid|GO:0031984,organelle subcompartment|GO:0016020,membrane|GO:0044436,thylakoid part|GO:00…	GO:0005488,binding|GO:0003824,catalytic activity|GO:0016655,oxidoreductase activity, acting on NAD(P)H, quinone or similar compound as acceptor|GO:0048037,cofactor binding|GO:0016651,oxidoreductase activity, acting on NAD(P)H|GO:0048038,quinone binding|GO:0016491,oxidoreductase activity		http://www.uniprot.org/uniprot/Q9LVM2	FALSE
760	3.71	3.83	20.5	gi|743930501	PREDICTED: DAG protein, chloroplastic [Populus euphratica]	5	Populus euphratica	0.3436	0.4917	0.1837	0.3037	0.4613	0.6799	0.2535	0.3827	0.310525	76.92	1e-87	Q9LPZ1	MORF9	GO:0008104,protein localization|GO:0080090,regulation of primary metabolic process|GO:0019222,regulation of metabolic process|GO:0043412,macromolecule modification|GO:0009451,RNA modification|GO:0061024,membrane organization|GO:0044281,small molecule metabolic process|GO:0044283,small molecule biosynthetic process|GO:1901362,organic cyclic compound biosynthetic process|GO:0045036,protein targetin…	GO:0031975,envelope|GO:0043229,intracellular organelle|GO:0043227,membrane-bounded organelle|GO:0043226,organelle|GO:0005737,cytoplasm|GO:0009941,chloroplast envelope|GO:0009536,plastid|GO:0009532,plastid stroma|GO:0009570,chloroplast stroma|GO:0044435,plastid part|GO:0044434,chloroplast part|GO:0031967,organelle envelope|GO:0009507,chloroplast|GO:0009526,plastid envelope|GO:0043231,intracellular…	GO:0005488,binding|GO:0005515,protein binding		http://www.uniprot.org/uniprot/Q9LPZ1	FALSE
1403	2	2	12.1	gi|743931847	PREDICTED: uncharacterized protein LOC105115113 isoform X2 [Populus euphratica]	2	Populus euphratica	0.1754	0.3694	0.7178	0.4949	0.0679	0.2857	0.3597	0.3615	0.3302	82.28	1e-42	Q9T0H1	T6G15.50		GO:0009579,thylakoid|GO:0009534,chloroplast thylakoid|GO:0031984,organelle subcompartment|GO:0043231,intracellular membrane-bounded organelle|GO:0044464,cell part|GO:0031976,plastid thylakoid|GO:0044444,cytoplasmic part|GO:0005623,cell|GO:0005737,cytoplasm|GO:0044446,intracellular organelle part|GO:0043229,intracellular organelle|GO:0009536,plastid|GO:0044435,plastid part|GO:0044434,chloroplast p…			http://www.uniprot.org/uniprot/Q9T0H1	FALSE
1097	2.02	2.02	19.2	gi|743931981	PREDICTED: endo-1,3;1,4-beta-D-glucanase-like [Populus euphratica]	4	Populus euphratica	0.3499	0.4055	0.5754	0.6972	0.3221	0.3847	0.4786	0.6504	0.4315	65.83	1e-119	Q9LUG8	At3g23600	GO:0009167,purine ribonucleoside monophosphate metabolic process|GO:0044281,small molecule metabolic process|GO:0009161,ribonucleoside monophosphate metabolic process|GO:1901360,organic cyclic compound metabolic process|GO:0044712,single-organism catabolic process|GO:0044710,single-organism metabolic process|GO:0010035,response to inorganic substance|GO:0010256,endomembrane system organization|GO…	GO:0005737,cytoplasm|GO:0005829,cytosol|GO:0043231,intracellular membrane-bounded organelle|GO:0005634,nucleus|GO:0016020,membrane|GO:0044464,cell part|GO:0044444,cytoplasmic part|GO:0005623,cell|GO:0005622,intracellular|GO:0048046,apoplast|GO:0043229,intracellular organelle|GO:0071944,cell periphery|GO:0005886,plasma membrane|GO:0044424,intracellular part|GO:0043227,membrane-bounded organelle|GO…	GO:0016787,hydrolase activity|GO:0003824,catalytic activity		http://www.uniprot.org/uniprot/Q9LUG8	FALSE
965	2.19	2.23	2.8	gi|743932139	PREDICTED: golgin subfamily B member 1-like [Populus euphratica]	1	Populus euphratica	0.492	0.6452	0.5546	0.6105	0.4571	0.7593	0.492	0.7175	0.498925	48.73	8e-175	F4HZS8	At1g22060	GO:0048638,regulation of developmental growth|GO:0048589,developmental growth|GO:0035266,meristem growth|GO:0007275,multicellular organismal development|GO:0044699,single-organism process|GO:0040007,growth|GO:0040008,regulation of growth|GO:0050789,regulation of biological process|GO:0048513,organ development|GO:0065007,biological regulation|GO:0032502,developmental process|GO:0032501,multicellul…	GO:0005737,cytoplasm|GO:0043231,intracellular membrane-bounded organelle|GO:0005773,vacuole|GO:0044464,cell part|GO:0043229,intracellular organelle|GO:0005623,cell|GO:0005622,intracellular|GO:0044444,cytoplasmic part|GO:0044424,intracellular part|GO:0043227,membrane-bounded organelle|GO:0043226,organelle			http://www.uniprot.org/uniprot/F4HZS8	FALSE
562	4.66	4.91	49.3	gi|743932458	PREDICTED: photosystem I reaction center subunit VI, chloroplastic-like [Populus euphratica]	17	Populus euphratica	0.1236	0.4154	0.1282	0.4659	0.1585	0.401	0.1675	0.4485	0.14445	81.75	1e-50	Q9SUI6	PSAH2	GO:0019220,regulation of phosphate metabolic process|GO:0080090,regulation of primary metabolic process|GO:0019222,regulation of metabolic process|GO:0006470,protein dephosphorylation|GO:0044281,small molecule metabolic process|GO:0044283,small molecule biosynthetic process|GO:0015979,photosynthesis|GO:1901360,organic cyclic compound metabolic process|GO:0044710,single-organism metabolic process|…	GO:0055035,plastid thylakoid membrane|GO:0034357,photosynthetic membrane|GO:0031976,plastid thylakoid|GO:0043229,intracellular organelle|GO:0005622,intracellular|GO:0043227,membrane-bounded organelle|GO:0043226,organelle|GO:0031224,intrinsic component of membrane|GO:0009535,chloroplast thylakoid membrane|GO:0009534,chloroplast thylakoid|GO:0031984,organelle subcompartment|GO:0009532,plastid strom…		ath00195,Photosynthesis|ath01100,Metabolic pathways	http://www.uniprot.org/uniprot/Q9SUI6	FALSE
271	9.33	9.39	9.9	gi|743933031	PREDICTED: pyruvate, phosphate dikinase, chloroplastic [Populus euphratica]	8	Populus euphratica	0.4285	0.2067	0.4055	0.1532	0.5297	0.2428	0.4613	0.1771	0.45625	84.2	0	O23404	PPDK	GO:0044710,single-organism metabolic process|GO:0006082,organic acid metabolic process|GO:0016310,phosphorylation|GO:0009987,cellular process|GO:0019752,carboxylic acid metabolic process|GO:0032787,monocarboxylic acid metabolic process|GO:0071704,organic substance metabolic process|GO:0006796,phosphate-containing compound metabolic process|GO:0044763,single-organism cellular process|GO:0044281,sm…	GO:0005737,cytoplasm|GO:0005829,cytosol|GO:0009536,plastid|GO:0043231,intracellular membrane-bounded organelle|GO:0009532,plastid stroma|GO:0009570,chloroplast stroma|GO:0005634,nucleus|GO:0044464,cell part|GO:0044444,cytoplasmic part|GO:0005623,cell|GO:0005622,intracellular|GO:0044446,intracellular organelle part|GO:0043229,intracellular organelle|GO:0044435,plastid part|GO:0044434,chloroplast p…	GO:0035639,purine ribonucleoside triphosphate binding|GO:0005488,binding|GO:0043167,ion binding|GO:1901363,heterocyclic compound binding|GO:1901265,nucleoside phosphate binding|GO:0001882,nucleoside binding|GO:0043168,anion binding|GO:0043169,cation binding|GO:0000166,nucleotide binding|GO:0016740,transferase activity|GO:0001883,purine nucleoside binding|GO:0032549,ribonucleoside binding|GO:00170…	ath00620,Pyruvate metabolism|ath00710,Carbon fixation in photosynthetic organisms|ath01100,Metabolic pathways|ath01200,Carbon metabolism	http://www.uniprot.org/uniprot/O23404	FALSE
936	2.3	2.35	20.8	gi|743935689	PREDICTED: uncharacterized protein LOC105116519 [Populus euphratica]	1	Populus euphratica	0.4966	0.3386	0.2128	0.2427	0.4406	0.3325	0.1514	0.2387	0.32535	75.7	1e-52	O49317	At2g33180	GO:0080090,regulation of primary metabolic process|GO:0019222,regulation of metabolic process|GO:0019682,glyceraldehyde-3-phosphate metabolic process|GO:0044281,small molecule metabolic process|GO:0044283,small molecule biosynthetic process|GO:1901362,organic cyclic compound biosynthetic process|GO:0071840,cellular component organization or biogenesis|GO:0044710,single-organism metabolic process|…	GO:0005737,cytoplasm|GO:0009536,plastid|GO:0043231,intracellular membrane-bounded organelle|GO:0009532,plastid stroma|GO:0009570,chloroplast stroma|GO:0044464,cell part|GO:0044444,cytoplasmic part|GO:0005623,cell|GO:0005622,intracellular|GO:0044446,intracellular organelle part|GO:0043229,intracellular organelle|GO:0044435,plastid part|GO:0044434,chloroplast part|GO:0044424,intracellular part|GO:0…			http://www.uniprot.org/uniprot/O49317	FALSE
189	11.69	11.75	30.8	gi|743936171	PREDICTED: oxygen-evolving enhancer protein 3-2, chloroplastic-like [Populus euphratica]	20	Populus euphratica	0.1888	0.2254	0.138	0.2166	0.169	0.2477	0.1127	0.2377	0.152125	70.76	6e-86	Q41932	PSBQ2	GO:0008152,metabolic process|GO:0050801,ion homeostasis|GO:0042592,homeostatic process|GO:0044249,cellular biosynthetic process|GO:0015979,photosynthesis|GO:0044699,single-organism process|GO:0065007,biological regulation|GO:0065008,regulation of biological quality|GO:0019725,cellular homeostasis|GO:0006810,transport|GO:0006812,cation transport|GO:0006811,ion transport|GO:0009987,cellular process…	GO:0055035,plastid thylakoid membrane|GO:0034357,photosynthetic membrane|GO:0031976,plastid thylakoid|GO:0031977,thylakoid lumen|GO:0019898,extrinsic component of membrane|GO:0048046,apoplast|GO:0043229,intracellular organelle|GO:0005622,intracellular|GO:0009654,photosystem II oxygen evolving complex|GO:0043226,organelle|GO:0009535,chloroplast thylakoid membrane|GO:0009534,chloroplast thylakoid|G…	GO:0043169,cation binding|GO:0043167,ion binding|GO:0005488,binding|GO:0046872,metal ion binding|GO:0005509,calcium ion binding	ath00195,Photosynthesis|ath01100,Metabolic pathways	http://www.uniprot.org/uniprot/Q41932	FALSE
506	5.48	5.61	32.6	gi|743937119	PREDICTED: fructose-1,6-bisphosphatase, chloroplastic-like [Populus euphratica]	15	Populus euphratica	0.4742	0.8539	0.4742	0.8032	0.4446	0.7509	0.4446	0.7057	0.4594	87.88	0	P25851	FBP	GO:0019220,regulation of phosphate metabolic process|GO:0080090,regulation of primary metabolic process|GO:0019222,regulation of metabolic process|GO:0006470,protein dephosphorylation|GO:0006778,porphyrin-containing compound metabolic process|GO:0006779,porphyrin-containing compound biosynthetic process|GO:0061024,membrane organization|GO:0015977,carbon fixation|GO:0044281,small molecule metaboli…	GO:0031975,envelope|GO:0048046,apoplast|GO:0043229,intracellular organelle|GO:0043227,membrane-bounded organelle|GO:0043226,organelle|GO:0005737,cytoplasm|GO:0009536,plastid|GO:0009532,plastid stroma|GO:0009570,chloroplast stroma|GO:0010319,stromule|GO:0044435,plastid part|GO:0044434,chloroplast part|GO:0031967,organelle envelope|GO:0009507,chloroplast|GO:0009526,plastid envelope|GO:0043231,intra…	GO:0050308,sugar-phosphatase activity|GO:0019203,carbohydrate phosphatase activity|GO:0042132,fructose 1,6-bisphosphate 1-phosphatase activity|GO:0016791,phosphatase activity|GO:0016787,hydrolase activity|GO:0043169,cation binding|GO:0016788,hydrolase activity, acting on ester bonds|GO:0043167,ion binding|GO:0042578,phosphoric ester hydrolase activity|GO:0003824,catalytic activity|GO:0005488,bind…	ath00030,Pentose phosphate pathway|ath00710,Carbon fixation in photosynthetic organisms|ath00010,Glycolysis / Gluconeogenesis|ath00051,Fructose and mannose metabolism|ath01200,Carbon metabolism|ath01110,Biosynthesis of secondary metabolites|ath01100,Metabolic pathways	http://www.uniprot.org/uniprot/P25851	FALSE
943	2.26	2.31	8.6	gi|743937291	PREDICTED: uncharacterized protein LOC105117173 isoform X4 [Populus euphratica]	5	Populus euphratica	0.4246	0.312	0.4571	0.3519	0.3532	0.2401	0.3873	0.2641	0.40555	74.37	0	F4K2Y3	At5g36210	GO:0031365,N-terminal protein amino acid modification|GO:0044249,cellular biosynthetic process|GO:0006499,N-terminal protein myristoylation|GO:0034645,cellular macromolecule biosynthetic process|GO:1901576,organic substance biosynthetic process|GO:0042158,lipoprotein biosynthetic process|GO:0043170,macromolecule metabolic process|GO:0043543,protein acylation|GO:0044260,cellular macromolecule meta…	GO:0005737,cytoplasm|GO:0009536,plastid|GO:0043231,intracellular membrane-bounded organelle|GO:0005829,cytosol|GO:0044464,cell part|GO:0044444,cytoplasmic part|GO:0005623,cell|GO:0005622,intracellular|GO:0043229,intracellular organelle|GO:0044424,intracellular part|GO:0043227,membrane-bounded organelle|GO:0043226,organelle|GO:0009507,chloroplast	GO:0004177,aminopeptidase activity|GO:0017171,serine hydrolase activity|GO:0016787,hydrolase activity|GO:0003824,catalytic activity|GO:0008238,exopeptidase activity|GO:0070011,peptidase activity, acting on L-amino acid peptides|GO:0008233,peptidase activity|GO:0008236,serine-type peptidase activity		http://www.uniprot.org/uniprot/F4K2Y3	FALSE
1546	1.38	1.64	11	gi|743938038	PREDICTED: protein PROTON GRADIENT REGULATION 5, chloroplastic-like [Populus euphratica]	1	Populus euphratica	0.4875	0.4801	0.5248	0.4726	0.3221	0.442	0.3565	0.4354	0.422725	73.28	2e-60	Q9SL05	PGR5	GO:0042221,response to chemical|GO:0010035,response to inorganic substance|GO:0071484,cellular response to light intensity|GO:0071482,cellular response to light stimulus|GO:0051234,establishment of localization|GO:0051049,regulation of transport|GO:0009416,response to light stimulus|GO:0009414,response to water deprivation|GO:0009415,response to water|GO:0006091,generation of precursor metabolite…	GO:0055035,plastid thylakoid membrane|GO:0034357,photosynthetic membrane|GO:0031976,plastid thylakoid|GO:0043229,intracellular organelle|GO:0009579,thylakoid|GO:0043227,membrane-bounded organelle|GO:0043226,organelle|GO:0009535,chloroplast thylakoid membrane|GO:0009534,chloroplast thylakoid|GO:0031984,organelle subcompartment|GO:0016020,membrane|GO:0044436,thylakoid part|GO:0044435,plastid part|G…	GO:0005488,binding|GO:0005515,protein binding|GO:0009055,electron carrier activity		http://www.uniprot.org/uniprot/Q9SL05	FALSE
1300	2	2	15.6	gi|743938916	PREDICTED: dolichol-phosphate mannosyltransferase subunit 1-like [Populus euphratica]	1	Populus euphratica	0.1271	0.4683	0.2466	0.5162	0.1057	0.4002	0.2377	0.4369	0.179275	23.17	6e-14	Q9SLN0	At2g39630	GO:0030148,sphingolipid biosynthetic process|GO:0044249,cellular biosynthetic process|GO:0006807,nitrogen compound metabolic process|GO:0044281,small molecule metabolic process|GO:0044283,small molecule biosynthetic process|GO:1901362,organic cyclic compound biosynthetic process|GO:0044699,single-organism process|GO:0006643,membrane lipid metabolic process|GO:1901576,organic substance biosyntheti…	GO:0005737,cytoplasm|GO:0005783,endoplasmic reticulum|GO:0044464,cell part|GO:0043229,intracellular organelle|GO:0005623,cell|GO:0005622,intracellular|GO:0044444,cytoplasmic part|GO:0012505,endomembrane system|GO:0044424,intracellular part|GO:0043227,membrane-bounded organelle|GO:0043226,organelle|GO:0043231,intracellular membrane-bounded organelle	GO:0003824,catalytic activity|GO:0016740,transferase activity|GO:0016757,transferase activity, transferring glycosyl groups	ath00510,N-Glycan biosynthesis|ath01100,Metabolic pathways	http://www.uniprot.org/uniprot/Q9SLN0	FALSE
1401	2	2	8.3	gi|743939144	PREDICTED: uncharacterized protein LOC105117914 [Populus euphratica]	1	Populus euphratica	0.3373	0.3762	0.3664	0.3004	0.3631	0.4027	0.3767	0.3179	0.360875	62.09	2e-58	Q8RXS1	PNSB4	GO:0006778,porphyrin-containing compound metabolic process|GO:0006779,porphyrin-containing compound biosynthetic process|GO:0044281,small molecule metabolic process|GO:1901362,organic cyclic compound biosynthetic process|GO:0015979,photosynthesis|GO:0071840,cellular component organization or biogenesis|GO:0044710,single-organism metabolic process|GO:0044711,single-organism biosynthetic process|GO…	GO:0055035,plastid thylakoid membrane|GO:0034357,photosynthetic membrane|GO:0031976,plastid thylakoid|GO:0043229,intracellular organelle|GO:0005622,intracellular|GO:0043227,membrane-bounded organelle|GO:0043226,organelle|GO:0031224,intrinsic component of membrane|GO:0009535,chloroplast thylakoid membrane|GO:0009534,chloroplast thylakoid|GO:0031984,organelle subcompartment|GO:0016021,integral comp…			http://www.uniprot.org/uniprot/Q8RXS1	FALSE
891	2.51	2.56	12	gi|743941642	PREDICTED: photosystem I reaction center subunit XI, chloroplastic-like [Populus euphratica]	1	Populus euphratica	0.177	0.2952	0.1259	0.2868	0.2443	0.2773	0.166	0.2698	0.1783	78.08	4e-101	Q9SUI4	PSAL	GO:0022607,cellular component assembly|GO:0008152,metabolic process|GO:0070271,protein complex biogenesis|GO:0043933,macromolecular complex subunit organization|GO:0050801,ion homeostasis|GO:0042592,homeostatic process|GO:0034641,cellular nitrogen compound metabolic process|GO:0006807,nitrogen compound metabolic process|GO:1901360,organic cyclic compound metabolic process|GO:0034622,cellular macr…	GO:0055035,plastid thylakoid membrane|GO:0034357,photosynthetic membrane|GO:0031976,plastid thylakoid|GO:0031975,envelope|GO:0043229,intracellular organelle|GO:0009579,thylakoid|GO:0043227,membrane-bounded organelle|GO:0043226,organelle|GO:0031224,intrinsic component of membrane|GO:0009535,chloroplast thylakoid membrane|GO:0009534,chloroplast thylakoid|GO:0031984,organelle subcompartment|GO:00095…	GO:0005488,binding|GO:0005515,protein binding	ath00195,Photosynthesis|ath01100,Metabolic pathways	http://www.uniprot.org/uniprot/Q9SUI4	FALSE
409	6.51	6.63	32.3	gi|743942424	PREDICTED: ribulose bisphosphate carboxylase small chain, chloroplastic-like, partial [Populus euphratica]	12	Populus euphratica	0.2128	0.1242	0.2992	0.1446	0.2655	0.135	0.3698	0.1581	0.286825	78.06	3e-92	P10795	RBCS-1A	GO:0070271,protein complex biogenesis|GO:0009314,response to radiation|GO:0044249,cellular biosynthetic process|GO:0015977,carbon fixation|GO:0009416,response to light stimulus|GO:0015979,photosynthesis|GO:0044699,single-organism process|GO:1901576,organic substance biosynthetic process|GO:0044710,single-organism metabolic process|GO:0044711,single-organism biosynthetic process|GO:0019685,photosy…	GO:0022626,cytosolic ribosome|GO:0055035,plastid thylakoid membrane|GO:0034357,photosynthetic membrane|GO:0031976,plastid thylakoid|GO:0031977,thylakoid lumen|GO:0031975,envelope|GO:0048046,apoplast|GO:0043229,intracellular organelle|GO:0043228,non-membrane-bounded organelle|GO:0042170,plastid membrane|GO:0005622,intracellular|GO:0043227,membrane-bounded organelle|GO:0043226,organelle|GO:0009535,…	GO:0043169,cation binding|GO:0004497,monooxygenase activity|GO:0046872,metal ion binding|GO:0046914,transition metal ion binding|GO:0016984,ribulose-bisphosphate carboxylase activity|GO:0016829,lyase activity|GO:0016830,carbon-carbon lyase activity|GO:0016831,carboxy-lyase activity|GO:0043167,ion binding|GO:0003824,catalytic activity|GO:0005488,binding|GO:0005507,copper ion binding|GO:0016491,oxi…	ath00630,Glyoxylate and dicarboxylate metabolism|ath00710,Carbon fixation in photosynthetic organisms|ath01100,Metabolic pathways|ath01200,Carbon metabolism	http://www.uniprot.org/uniprot/P10795	FALSE
381	7.05	39.97	68.2	gi|743943809	PREDICTED: chlorophyll a-b binding protein of LHCII type 1-like [Populus euphratica]	165	Populus euphratica	0.0649	0.5217	0.1169	0.4557	0.0474	0.5129	0.0661	0.4486	0.073825	87.97	2e-172	Q39142	Lhb1B1	GO:0044267,cellular protein metabolic process|GO:0044260,cellular macromolecule metabolic process|GO:0044238,primary metabolic process|GO:0019538,protein metabolic process|GO:0044237,cellular metabolic process|GO:0019684,photosynthesis, light reaction|GO:0009987,cellular process|GO:0006464,cellular protein modification process|GO:0015979,photosynthesis|GO:0071704,organic substance metabolic proce…	GO:0055035,plastid thylakoid membrane|GO:0034357,photosynthetic membrane|GO:0031976,plastid thylakoid|GO:0031975,envelope|GO:0043229,intracellular organelle|GO:0009579,thylakoid|GO:0043227,membrane-bounded organelle|GO:0043226,organelle|GO:0031224,intrinsic component of membrane|GO:0009535,chloroplast thylakoid membrane|GO:0009534,chloroplast thylakoid|GO:0031984,organelle subcompartment|GO:00095…	GO:0043169,cation binding|GO:0016168,chlorophyll binding|GO:0046906,tetrapyrrole binding|GO:0097159,organic cyclic compound binding|GO:0043167,ion binding|GO:0005488,binding|GO:0046872,metal ion binding|GO:1901363,heterocyclic compound binding	ath01100,Metabolic pathways|ath00196,Photosynthesis - antenna proteins	http://www.uniprot.org/uniprot/Q39142	FALSE
1341	2	2	6.7	gi|743944209	PREDICTED: calcium-binding and coiled-coil domain-containing protein 2-like isoform X3 [Populus euphratica]	1	Populus euphratica	0.5395	0.7522	0.597	0.6691	0.4285	0.4453	0.4169	0.4058	0.495475	34.88	0.3	Q9M0X5	CRK25	GO:0006820,anion transport|GO:0006826,iron ion transport|GO:0007165,signal transduction|GO:0007166,cell surface receptor signaling pathway|GO:0007167,enzyme linked receptor protein signaling pathway|GO:0071840,cellular component organization or biogenesis|GO:0009755,hormone-mediated signaling pathway|GO:0071554,cell wall organization or biogenesis|GO:0044710,single-organism metabolic process|GO:0…	GO:0016021,integral component of membrane|GO:0016020,membrane|GO:0044464,cell part|GO:0005623,cell|GO:0055044,symplast|GO:0071944,cell periphery|GO:0030054,cell junction|GO:0005911,cell-cell junction|GO:0005886,plasma membrane|GO:0009506,plasmodesma|GO:0044425,membrane part|GO:0031224,intrinsic component of membrane	GO:0038023,signaling receptor activity|GO:0035639,purine ribonucleoside triphosphate binding|GO:0019899,enzyme binding|GO:0060089,molecular transducer activity|GO:0004872,receptor activity|GO:0004871,signal transducer activity|GO:0044389,ubiquitin-like protein ligase binding|GO:0043167,ion binding|GO:1901363,heterocyclic compound binding|GO:0001883,purine nucleoside binding|GO:0001882,nucleoside …		http://www.uniprot.org/uniprot/Q9M0X5	FALSE

## Sheet: Up DEPs
Number	Unused	Total	Percent Coverage (% cov)	Accession #	Name	Peptides(95%)	Species	115:113	PVal 115:113	116:113	PVal 116:113	115:114	PVal 115:114	116:114	PVal 116:114	FoldChange	Log2FoldChange	Identity	Evalue	Uniprot	Genename	Biological Process	Cell Component	Molecular Function	KEGG Pathways	UNIPROT_URL	Transcription Factor
1340	2	2	5.9	gi|9998899	cinnamyl alcohol dehydrogenase [Populus trichocarpa]	1	Populus trichocarpa	2.884	0.4235	2.6062	0.3906	4.1687	0.3012	3.6983	0.2831	3.3393	1.73955	78.43	2e-167	P48523	CAD4	GO:0044249,cellular biosynthetic process|GO:1901362,organic cyclic compound biosynthetic process|GO:0009699,phenylpropanoid biosynthetic process|GO:1901360,organic cyclic compound metabolic process|GO:1901576,organic substance biosynthetic process|GO:0044710,single-organism metabolic process|GO:0044711,single-organism biosynthetic process|GO:0009809,lignin biosynthetic process|GO:0009808,lignin m…		GO:0005488,binding|GO:0043169,cation binding|GO:0016614,oxidoreductase activity, acting on CH-OH group of donors|GO:0046914,transition metal ion binding|GO:0016616,oxidoreductase activity, acting on the CH-OH group of donors, NAD or NADP as acceptor|GO:0052747,sinapyl alcohol dehydrogenase activity|GO:0043167,ion binding|GO:0003824,catalytic activity|GO:0045551,cinnamyl-alcohol dehydrogenase acti…	ath00940,Phenylpropanoid biosynthesis|ath01100,Metabolic pathways|ath01110,Biosynthesis of secondary metabolites	http://www.uniprot.org/uniprot/P48523	FALSE
1161	2	20.92	37.3	gi|224060333	adenosylhomocysteinase family protein [Populus trichocarpa]	25	Populus trichocarpa	4.1305	0.2492	4.2462	0.238	3.6644	0.2677	3.7325	0.255	3.9434	1.97944	93.2	0	O23255	SAHH1	GO:0022622,root system development|GO:0009628,response to abiotic stimulus|GO:0080090,regulation of primary metabolic process|GO:0019222,regulation of metabolic process|GO:0048588,developmental cell growth|GO:0051049,regulation of transport|GO:0048468,cell development|GO:0048469,cell maturation|GO:0009167,purine ribonucleoside monophosphate metabolic process|GO:0043933,macromolecular complex subu…	GO:0048046,apoplast|GO:0043229,intracellular organelle|GO:0071944,cell periphery|GO:0043227,membrane-bounded organelle|GO:0043226,organelle|GO:0030054,cell junction|GO:0005737,cytoplasm|GO:0031090,organelle membrane|GO:0005773,vacuole|GO:0098805,whole membrane|GO:0016020,membrane|GO:0005774,vacuolar membrane|GO:0044437,vacuolar part|GO:0005794,Golgi apparatus|GO:0098588,bounding membrane of organ…	GO:0016787,hydrolase activity|GO:0046872,metal ion binding|GO:0046914,transition metal ion binding|GO:0043169,cation binding|GO:0016801,hydrolase activity, acting on ether bonds|GO:0004013,adenosylhomocysteinase activity|GO:0016802,trialkylsulfonium hydrolase activity|GO:0043167,ion binding|GO:0003824,catalytic activity|GO:0005488,binding|GO:0005507,copper ion binding	ath00270,Cysteine and methionine metabolism|ath01100,Metabolic pathways	http://www.uniprot.org/uniprot/O23255	FALSE
173	12.34	12.44	36.8	gi|224063082	Photosystem II 22 kDa family protein [Populus trichocarpa]	50	Populus trichocarpa	2.1086	0.1627	2.3768	0.1749	2.6546	0.1593	2.9648	0.1712	2.5262	1.33697	73.16	2e-98	Q9XF91	PSBS	GO:0019222,regulation of metabolic process|GO:0061024,membrane organization|GO:0044281,small molecule metabolic process|GO:0044283,small molecule biosynthetic process|GO:0015979,photosynthesis|GO:0071840,cellular component organization or biogenesis|GO:0044710,single-organism metabolic process|GO:0044711,single-organism biosynthetic process|GO:0044093,positive regulation of molecular function|GO:…	GO:0055035,plastid thylakoid membrane|GO:0034357,photosynthetic membrane|GO:0031976,plastid thylakoid|GO:0043229,intracellular organelle|GO:0009517,PSII associated light-harvesting complex II|GO:0030076,light-harvesting complex|GO:0005622,intracellular|GO:0043227,membrane-bounded organelle|GO:0043226,organelle|GO:0031224,intrinsic component of membrane|GO:0009535,chloroplast thylakoid membrane|GO…	GO:0016168,chlorophyll binding|GO:0031409,pigment binding|GO:0046906,tetrapyrrole binding|GO:0097159,organic cyclic compound binding|GO:0051738,xanthophyll binding|GO:0019840,isoprenoid binding|GO:0008289,lipid binding|GO:0005488,binding|GO:1901363,heterocyclic compound binding	ath00195,Photosynthesis|ath01100,Metabolic pathways	http://www.uniprot.org/uniprot/Q9XF91	FALSE
1476	1.73	2.12	11	gi|224063293	FH INTERACTING protein 1 [Populus trichocarpa]	1	Populus trichocarpa	1.5704	0.4512	2.2284	0.3203	2.2284	0.2921	3.1333	0.2137	2.29013	1.19543	68.11	8e-111	Q9SE96	FIP1	GO:0008104,protein localization|GO:0072666,establishment of protein localization to vacuole|GO:0072665,protein localization to vacuole|GO:0061025,membrane fusion|GO:0061024,membrane organization|GO:0051641,cellular localization|GO:0071840,cellular component organization or biogenesis|GO:0051234,establishment of localization|GO:0070727,cellular macromolecule localization|GO:0006886,intracellular p…	GO:0044464,cell part|GO:0005623,cell|GO:0005622,intracellular			http://www.uniprot.org/uniprot/Q9SE96	FALSE
78	18.87	18.88	35.1	gi|224072811	hypothetical protein POPTR_0003s20360g [Populus trichocarpa]	25	Populus trichocarpa	2.5351	0.0495	1.3062	0.6818	2.9923	0.0872	1.406	0.6218	2.0599	1.04257	79.13	0	P40941	AAC2	GO:0008104,protein localization|GO:0051049,regulation of transport|GO:0048583,regulation of response to stimulus|GO:0061025,membrane fusion|GO:0061024,membrane organization|GO:0006820,anion transport|GO:1901576,organic substance biosynthetic process|GO:0071840,cellular component organization or biogenesis|GO:0051716,cellular response to stimulus|GO:0044711,single-organism biosynthetic process|GO:…	GO:0044464,cell part|GO:0031975,envelope|GO:0043229,intracellular organelle|GO:0043227,membrane-bounded organelle|GO:0043226,organelle|GO:0031224,intrinsic component of membrane|GO:0005737,cytoplasm|GO:0009941,chloroplast envelope|GO:0009536,plastid|GO:0031090,organelle membrane|GO:0005773,vacuole|GO:0016021,integral component of membrane|GO:0016020,membrane|GO:0044444,cytoplasmic part|GO:0005739…	GO:0005346,purine ribonucleotide transmembrane transporter activity|GO:0005347,ATP transmembrane transporter activity|GO:0015932,nucleobase-containing compound transmembrane transporter activity|GO:0015605,organophosphate ester transmembrane transporter activity|GO:0046872,metal ion binding|GO:0005488,binding|GO:0015291,secondary active transmembrane transporter activity|GO:0043169,cation binding…		http://www.uniprot.org/uniprot/P40941	FALSE
1394	2	2	2.7	gi|224086094	hypothetical protein POPTR_0005s27680g [Populus trichocarpa]	1	Populus trichocarpa	1.9953	0.3256	2.5823	0.2475	1.9055	0.3443	2.466	0.2586	2.23728	1.16174	69.27	0	Q8LPQ8	MSSP2	GO:0046323,glucose import|GO:0008643,carbohydrate transport|GO:0034219,carbohydrate transmembrane transport|GO:0044699,single-organism process|GO:0015992,proton transport|GO:0008645,hexose transport|GO:0051179,localization|GO:0015758,glucose transport|GO:0006810,transport|GO:0071702,organic substance transport|GO:0015672,monovalent inorganic cation transport|GO:0035428,hexose transmembrane transp…	GO:0043229,intracellular organelle|GO:0071944,cell periphery|GO:0031226,intrinsic component of plasma membrane|GO:0043226,organelle|GO:0031224,intrinsic component of membrane|GO:0005737,cytoplasm|GO:0031090,organelle membrane|GO:0005773,vacuole|GO:0043227,membrane-bounded organelle|GO:0016021,integral component of membrane|GO:0016020,membrane|GO:0005774,vacuolar membrane|GO:0044437,vacuolar part|…	GO:0005355,glucose transmembrane transporter activity|GO:0015295,solute:proton symporter activity|GO:0022891,substrate-specific transmembrane transporter activity|GO:0022892,substrate-specific transporter activity|GO:0005351,sugar:proton symporter activity|GO:0015293,symporter activity|GO:0051119,sugar transmembrane transporter activity|GO:1901476,carbohydrate transporter activity|GO:0005215,tran…		http://www.uniprot.org/uniprot/Q8LPQ8	FALSE
214	10.9	10.97	19.3	gi|224100535	hypothetical protein POPTR_0008s01000g [Populus trichocarpa]	9	Populus trichocarpa	4.1687	0.2839	4.2462	0.3291	3.02	0.2809	2.9648	0.3251	3.59992	1.84797	81.11	0	O04130	PGDH2	GO:0019752,carboxylic acid metabolic process|GO:0044249,cellular biosynthetic process|GO:0006807,nitrogen compound metabolic process|GO:0044281,small molecule metabolic process|GO:0044283,small molecule biosynthetic process|GO:0009069,serine family amino acid metabolic process|GO:0044699,single-organism process|GO:1901576,organic substance biosynthetic process|GO:0044710,single-organism metabolic…	GO:0005737,cytoplasm|GO:0009536,plastid|GO:0043231,intracellular membrane-bounded organelle|GO:0044464,cell part|GO:0044444,cytoplasmic part|GO:0005623,cell|GO:0005622,intracellular|GO:0043229,intracellular organelle|GO:0044424,intracellular part|GO:0043227,membrane-bounded organelle|GO:0043226,organelle|GO:0009507,chloroplast	GO:0043168,anion binding|GO:0050662,coenzyme binding|GO:0016614,oxidoreductase activity, acting on CH-OH group of donors|GO:0016616,oxidoreductase activity, acting on the CH-OH group of donors, NAD or NADP as acceptor|GO:0043177,organic acid binding|GO:0051287,NAD binding|GO:0031406,carboxylic acid binding|GO:0000166,nucleotide binding|GO:0036094,small molecule binding|GO:0003824,catalytic activi…	ath00260,Glycine, serine and threonine metabolism|ath01100,Metabolic pathways|ath01200,Carbon metabolism|ath01230,Biosynthesis of amino acids	http://www.uniprot.org/uniprot/O04130	FALSE
601	4.24	4.37	8.3	gi|224122176	hypothetical protein POPTR_0012s10830g [Populus trichocarpa]	6	Populus trichocarpa	3.1046	0.1899	2.4889	0.2749	3.3729	0.176	2.4434	0.2524	2.85245	1.5122	70.47	0	Q8LPJ3	At5g13980	GO:0022607,cellular component assembly|GO:0070271,protein complex biogenesis|GO:0043933,macromolecular complex subunit organization|GO:0034622,cellular macromolecular complex assembly|GO:0019752,carboxylic acid metabolic process|GO:1901564,organonitrogen compound metabolic process|GO:0044723,single-organism carbohydrate metabolic process|GO:0006807,nitrogen compound metabolic process|GO:0000226,m…	GO:0048046,apoplast|GO:0043229,intracellular organelle|GO:0071944,cell periphery|GO:0043227,membrane-bounded organelle|GO:0043226,organelle|GO:0005737,cytoplasm|GO:0031090,organelle membrane|GO:0005773,vacuole|GO:0098805,whole membrane|GO:0016020,membrane|GO:0005774,vacuolar membrane|GO:0044437,vacuolar part|GO:0098588,bounding membrane of organelle|GO:0030312,external encapsulating structure|GO:…	GO:0016787,hydrolase activity|GO:0015923,mannosidase activity|GO:0046914,transition metal ion binding|GO:0043169,cation binding|GO:0043167,ion binding|GO:0016798,hydrolase activity, acting on glycosyl bonds|GO:0030246,carbohydrate binding|GO:0003824,catalytic activity|GO:0008270,zinc ion binding|GO:0004553,hydrolase activity, hydrolyzing O-glycosyl compounds|GO:0046872,metal ion binding|GO:000455…	ath00511,Other glycan degradation	http://www.uniprot.org/uniprot/Q8LPJ3	FALSE
1191	2	9.35	36.1	gi|224140937	band 7 family protein [Populus trichocarpa]	9	Populus trichocarpa	1.6749	0.6487	1.8365	0.5898	2.2491	0.536	2.466	0.491	2.05663	1.04028	88.73	0	Q9FM19	HIR1		GO:0043229,intracellular organelle|GO:0071944,cell periphery|GO:0043227,membrane-bounded organelle|GO:0043226,organelle|GO:0030054,cell junction|GO:0005737,cytoplasm|GO:0031090,organelle membrane|GO:0005773,vacuole|GO:0098805,whole membrane|GO:0016020,membrane|GO:0005774,vacuolar membrane|GO:0044437,vacuolar part|GO:0005794,Golgi apparatus|GO:0098588,bounding membrane of organelle|GO:0055044,symp…	GO:0019899,enzyme binding|GO:0019901,protein kinase binding|GO:0019900,kinase binding|GO:0005488,binding|GO:0005515,protein binding|GO:0043424,protein histidine kinase binding		http://www.uniprot.org/uniprot/Q9FM19	FALSE
1061	2.03	2.04	5.3	gi|224141269	serine/threonine protein phosphatase 2A regulatory subunit B' [Populus trichocarpa]	1	Populus trichocarpa	17.5388	0.0864	7.5162	0.1218	4.2073	0.1689	1.803	0.3703	7.76633	2.95723	77.46	0	Q8LF36	B'THETA	GO:0019220,regulation of phosphate metabolic process|GO:0080090,regulation of primary metabolic process|GO:0019222,regulation of metabolic process|GO:0016311,dephosphorylation|GO:0010921,regulation of phosphatase activity|GO:0031323,regulation of cellular metabolic process|GO:0034047,regulation of protein phosphatase type 2A activity|GO:0023052,signaling|GO:0007165,signal transduction|GO:0050789,…	GO:0043234,protein complex|GO:0005737,cytoplasm|GO:0008287,protein serine/threonine phosphatase complex|GO:0032991,macromolecular complex|GO:0043231,intracellular membrane-bounded organelle|GO:0044464,cell part|GO:1903293,phosphatase complex|GO:0005777,peroxisome|GO:0044444,cytoplasmic part|GO:1902494,catalytic complex|GO:0005622,intracellular|GO:0042579,microbody|GO:0043229,intracellular organel…	GO:0019888,protein phosphatase regulator activity|GO:0019208,phosphatase regulator activity|GO:0008601,protein phosphatase type 2A regulator activity|GO:0098772,molecular function regulator|GO:0030234,enzyme regulator activity	ath03015,mRNA surveillance pathway	http://www.uniprot.org/uniprot/Q8LF36	FALSE
684	4	25.3	23.1	gi|224143678	plasma membrane H+ ATPase family protein [Populus trichocarpa]	14	Populus trichocarpa	2.7542	0.3852	3.8726	0.2993	1.0471	0.6566	1.4723	0.4639	2.28655	1.19317	88.5	0	P20649	AHA1	GO:0009167,purine ribonucleoside monophosphate metabolic process|GO:0009165,nucleotide biosynthetic process|GO:0009163,nucleoside biosynthetic process|GO:0009161,ribonucleoside monophosphate metabolic process|GO:1901362,organic cyclic compound biosynthetic process|GO:0042451,purine nucleoside biosynthetic process|GO:0009168,purine ribonucleoside monophosphate biosynthetic process|GO:0044710,singl…	GO:0043229,intracellular organelle|GO:0071944,cell periphery|GO:0043227,membrane-bounded organelle|GO:0043226,organelle|GO:0031224,intrinsic component of membrane|GO:0005737,cytoplasm|GO:0005773,vacuole|GO:0016021,integral component of membrane|GO:0016020,membrane|GO:0030054,cell junction|GO:0005794,Golgi apparatus|GO:0055044,symplast|GO:0012505,endomembrane system|GO:0005911,cell-cell junction|G…	GO:0035639,purine ribonucleoside triphosphate binding|GO:0036442,hydrogen-exporting ATPase activity|GO:0005488,binding|GO:0016887,ATPase activity|GO:0043167,ion binding|GO:1901363,heterocyclic compound binding|GO:0032550,purine ribonucleoside binding|GO:0001882,nucleoside binding|GO:0043168,anion binding|GO:0042625,ATPase activity, coupled to transmembrane movement of ions|GO:0042626,ATPase activ…	ath00190,Oxidative phosphorylation	http://www.uniprot.org/uniprot/P20649	FALSE
345	8	8	19.8	gi|566148278	UDP-glucose 4-epimerase family protein [Populus trichocarpa]	5	Populus trichocarpa	6.9823	0.0552	3.1333	0.1802	1.5276	0.2491	0.6607	0.7007	3.07598	1.62104	81.9	0	Q9SN58	UGE5	GO:0044238,primary metabolic process|GO:0044710,single-organism metabolic process|GO:0005975,carbohydrate metabolic process|GO:0071704,organic substance metabolic process|GO:0005996,monosaccharide metabolic process|GO:0019318,hexose metabolic process|GO:0006012,galactose metabolic process|GO:0008152,metabolic process|GO:0044723,single-organism carbohydrate metabolic process|GO:0044699,single-orga…		GO:0050662,coenzyme binding|GO:0016854,racemase and epimerase activity|GO:0016853,isomerase activity|GO:0016857,racemase and epimerase activity, acting on carbohydrates and derivatives|GO:0003824,catalytic activity|GO:0048037,cofactor binding|GO:0005488,binding|GO:0003978,UDP-glucose 4-epimerase activity	ath00052,Galactose metabolism|ath00520,Amino sugar and nucleotide sugar metabolism|ath01100,Metabolic pathways	http://www.uniprot.org/uniprot/Q9SN58	FALSE
1034	2.05	2.07	3.5	gi|566148978	hypothetical protein POPTR_0001s14630g [Populus trichocarpa]	1	Populus trichocarpa	3.767	0.242	2.9376	0.3704	1.0965	0.7264	0.8166	0.6927	2.15442	1.1073	72.19	0	Q9M9E1	ABCG40	GO:0009595,detection of biotic stimulus|GO:0008104,protein localization|GO:0019222,regulation of metabolic process|GO:0048585,negative regulation of response to stimulus|GO:0048583,regulation of response to stimulus|GO:0031348,negative regulation of defense response|GO:0009696,salicylic acid metabolic process|GO:0009697,salicylic acid biosynthetic process|GO:0007165,signal transduction|GO:0044283…	GO:0016021,integral component of membrane|GO:0016020,membrane|GO:0044464,cell part|GO:0005623,cell|GO:0005622,intracellular|GO:0071944,cell periphery|GO:0005886,plasma membrane|GO:0044425,membrane part|GO:0031224,intrinsic component of membrane	GO:0035639,purine ribonucleoside triphosphate binding|GO:0005488,binding|GO:0016887,ATPase activity|GO:0043167,ion binding|GO:1901363,heterocyclic compound binding|GO:1901265,nucleoside phosphate binding|GO:0001882,nucleoside binding|GO:0043168,anion binding|GO:0000166,nucleotide binding|GO:0001883,purine nucleoside binding|GO:0032549,ribonucleoside binding|GO:0017076,purine nucleotide binding|GO…		http://www.uniprot.org/uniprot/Q9M9E1	FALSE
823	2.99	3.09	8	gi|566162341	hypothetical protein POPTR_0003s12640g [Populus trichocarpa]	3	Populus trichocarpa	1.7539	0.0824	3.767	0.0839	8.9536	0.0244	15.2757	0.0245	7.43755	2.89483	69.57	0	Q39041	BFRUCT4	GO:0022622,root system development|GO:0071495,cellular response to endogenous stimulus|GO:0051716,cellular response to stimulus|GO:0006950,response to stress|GO:0072511,divalent inorganic cation transport|GO:0009311,oligosaccharide metabolic process|GO:0071229,cellular response to acid chemical|GO:0023052,signaling|GO:0007165,signal transduction|GO:0070887,cellular response to chemical stimulus|G…	GO:0005737,cytoplasm|GO:0000325,plant-type vacuole|GO:0005622,intracellular|GO:0043231,intracellular membrane-bounded organelle|GO:0005773,vacuole|GO:0044464,cell part|GO:0044444,cytoplasmic part|GO:0005623,cell|GO:0009505,plant-type cell wall|GO:0005618,cell wall|GO:0043229,intracellular organelle|GO:0071944,cell periphery|GO:0044424,intracellular part|GO:0030312,external encapsulating structure…	GO:0015926,glucosidase activity|GO:0016787,hydrolase activity|GO:0004575,sucrose alpha-glucosidase activity|GO:0016798,hydrolase activity, acting on glycosyl bonds|GO:0090599,alpha-glucosidase activity|GO:0003824,catalytic activity|GO:0004564,beta-fructofuranosidase activity|GO:0004553,hydrolase activity, hydrolyzing O-glycosyl compounds	ath00052,Galactose metabolism|ath00500,Starch and sucrose metabolism|ath01100,Metabolic pathways	http://www.uniprot.org/uniprot/Q39041	FALSE
1541	1.39	1.64	3.7	gi|566167975	hypothetical protein POPTR_0004s22180g [Populus trichocarpa]	1	Populus trichocarpa	4.4055	0.1636	5.6494	0.1405	2.6303	0.2422	3.4041	0.1954	4.02233	2.00803	66.58	0	Q9FUP0	OPR3	GO:0009738,abscisic acid-activated signaling pathway|GO:0050794,regulation of cellular process|GO:0009694,jasmonic acid metabolic process|GO:0009695,jasmonic acid biosynthetic process|GO:0007165,signal transduction|GO:0044282,small molecule catabolic process|GO:0044283,small molecule biosynthetic process|GO:1901362,organic cyclic compound biosynthetic process|GO:1901360,organic cyclic compound me…	GO:0005737,cytoplasm|GO:0043231,intracellular membrane-bounded organelle|GO:0044464,cell part|GO:0005777,peroxisome|GO:0044444,cytoplasmic part|GO:0005623,cell|GO:0005622,intracellular|GO:0042579,microbody|GO:0043229,intracellular organelle|GO:0044424,intracellular part|GO:0043227,membrane-bounded organelle|GO:0043226,organelle	GO:0043168,anion binding|GO:0050662,coenzyme binding|GO:0016629,12-oxophytodienoate reductase activity|GO:0016628,oxidoreductase activity, acting on the CH-CH group of donors, NAD or NADP as acceptor|GO:0097367,carbohydrate derivative binding|GO:0097159,organic cyclic compound binding|GO:0016627,oxidoreductase activity, acting on the CH-CH group of donors|GO:0000166,nucleotide binding|GO:0036094,…	ath01110,Biosynthesis of secondary metabolites|ath01100,Metabolic pathways|ath00592,alpha-Linolenic acid metabolism	http://www.uniprot.org/uniprot/Q9FUP0	FALSE
669	4.01	4.07	17.1	gi|566170533	hypothetical protein POPTR_0005s10290g [Populus trichocarpa]	3	Populus trichocarpa	5.3456	0.2546	6.0813	0.2373	5.1523	0.2667	6.7298	0.2478	5.82725	2.54282	82.56	0	Q9SHP0	PSAT2	GO:0010038,response to metal ion|GO:0019752,carboxylic acid metabolic process|GO:0044249,cellular biosynthetic process|GO:0006807,nitrogen compound metabolic process|GO:0044281,small molecule metabolic process|GO:0044283,small molecule biosynthetic process|GO:0009069,serine family amino acid metabolic process|GO:0044699,single-organism process|GO:1901576,organic substance biosynthetic process|GO:…	GO:0031976,plastid thylakoid|GO:0043229,intracellular organelle|GO:0043227,membrane-bounded organelle|GO:0043226,organelle|GO:0009579,thylakoid|GO:0009534,chloroplast thylakoid|GO:0031984,organelle subcompartment|GO:0009532,plastid stroma|GO:0009570,chloroplast stroma|GO:0044435,plastid part|GO:0044434,chloroplast part|GO:0005737,cytoplasm|GO:0009536,plastid|GO:0009507,chloroplast|GO:0043231,intr…	GO:0004648,O-phospho-L-serine:2-oxoglutarate aminotransferase activity|GO:0003824,catalytic activity|GO:0008483,transaminase activity|GO:0016740,transferase activity|GO:0016769,transferase activity, transferring nitrogenous groups	ath01230,Biosynthesis of amino acids|ath00260,Glycine, serine and threonine metabolism|ath01100,Metabolic pathways|ath01200,Carbon metabolism|ath00750,Vitamin B6 metabolism	http://www.uniprot.org/uniprot/Q9SHP0	FALSE
972	2.17	2.21	5.1	gi|566174566	hypothetical protein POPTR_0006s05130g [Populus trichocarpa]	1	Populus trichocarpa	6.1944	0.0341	7.379	0.0345	2.5823	0.3766	2.884	0.4265	4.75992	2.25094	82.19	0	Q94A08	RFS2	GO:0009311,oligosaccharide metabolic process|GO:0009313,oligosaccharide catabolic process|GO:0034484,raffinose catabolic process|GO:0044699,single-organism process|GO:0044712,single-organism catabolic process|GO:0044710,single-organism metabolic process|GO:0071704,organic substance metabolic process|GO:0080167,response to karrikin|GO:0044238,primary metabolic process|GO:1901575,organic substance …	GO:0055044,symplast|GO:0030054,cell junction|GO:0005911,cell-cell junction|GO:0009506,plasmodesma	GO:0047274,galactinol-sucrose galactosyltransferase activity|GO:0016787,hydrolase activity|GO:0052692,raffinose alpha-galactosidase activity|GO:0015925,galactosidase activity|GO:0016798,hydrolase activity, acting on glycosyl bonds|GO:0003824,catalytic activity|GO:0016740,transferase activity|GO:0004557,alpha-galactosidase activity|GO:0008378,galactosyltransferase activity|GO:0016757,transferase a…	ath00052,Galactose metabolism	http://www.uniprot.org/uniprot/Q94A08	FALSE
1068	2.02	6.12	10.6	gi|566176021	phenylalanine ammonia-lyase family protein [Populus trichocarpa]	5	Populus trichocarpa	1.7061	0.3423	1.5849	0.3888	3.2211	0.2075	2.9923	0.225	2.3761	1.2486	86.87	0	P35510	PAL1	GO:0080090,regulation of primary metabolic process|GO:0019222,regulation of metabolic process|GO:0009074,aromatic amino acid family catabolic process|GO:0009696,salicylic acid metabolic process|GO:0044281,small molecule metabolic process|GO:0044282,small molecule catabolic process|GO:0044283,small molecule biosynthetic process|GO:0009698,phenylpropanoid metabolic process|GO:0009699,phenylpropanoi…	GO:0005737,cytoplasm|GO:0044464,cell part|GO:0005623,cell|GO:0005622,intracellular|GO:0044424,intracellular part	GO:0016841,ammonia-lyase activity|GO:0016840,carbon-nitrogen lyase activity|GO:0016829,lyase activity|GO:0003824,catalytic activity|GO:0045548,phenylalanine ammonia-lyase activity|GO:0005488,binding|GO:0005515,protein binding	ath00940,Phenylpropanoid biosynthesis|ath01100,Metabolic pathways|ath00360,Phenylalanine metabolism|ath01110,Biosynthesis of secondary metabolites	http://www.uniprot.org/uniprot/P35510	FALSE
1055	2.03	2.07	10.6	gi|566176419	hypothetical protein POPTR_0006s14520g [Populus trichocarpa]	1	Populus trichocarpa	2.5823	0.3506	2.5586	0.3046	3.6308	0.3423	3.4674	0.2983	3.05977	1.61343	73.71	0	Q9FUP0	OPR3	GO:0009738,abscisic acid-activated signaling pathway|GO:0050794,regulation of cellular process|GO:0009694,jasmonic acid metabolic process|GO:0009695,jasmonic acid biosynthetic process|GO:0007165,signal transduction|GO:0044282,small molecule catabolic process|GO:0044283,small molecule biosynthetic process|GO:1901362,organic cyclic compound biosynthetic process|GO:1901360,organic cyclic compound me…	GO:0005737,cytoplasm|GO:0043231,intracellular membrane-bounded organelle|GO:0044464,cell part|GO:0005777,peroxisome|GO:0044444,cytoplasmic part|GO:0005623,cell|GO:0005622,intracellular|GO:0042579,microbody|GO:0043229,intracellular organelle|GO:0044424,intracellular part|GO:0043227,membrane-bounded organelle|GO:0043226,organelle	GO:0043168,anion binding|GO:0050662,coenzyme binding|GO:0016629,12-oxophytodienoate reductase activity|GO:0016628,oxidoreductase activity, acting on the CH-CH group of donors, NAD or NADP as acceptor|GO:0097367,carbohydrate derivative binding|GO:0097159,organic cyclic compound binding|GO:0016627,oxidoreductase activity, acting on the CH-CH group of donors|GO:0000166,nucleotide binding|GO:0036094,…	ath01110,Biosynthesis of secondary metabolites|ath01100,Metabolic pathways|ath00592,alpha-Linolenic acid metabolism	http://www.uniprot.org/uniprot/Q9FUP0	FALSE
406	6.55	6.64	8.9	gi|566177270	elongation factor Tu family protein [Populus trichocarpa]	3	Populus trichocarpa	1.6596	0.8044	1.9588	0.9761	2.466	0.1432	2.8054	0.0948	2.22245	1.15215	84.09	0	Q9LNC5	F9P14.8	GO:0048856,anatomical structure development|GO:0008152,metabolic process|GO:0061458,reproductive system development|GO:2000241,regulation of reproductive process|GO:0019953,sexual reproduction|GO:0009791,post-embryonic development|GO:0009790,embryo development|GO:0009793,embryo development ending in seed dormancy|GO:0032501,multicellular organismal process|GO:0034645,cellular macromolecule biosyn…	GO:0031974,membrane-enclosed lumen|GO:0043229,intracellular organelle|GO:0071944,cell periphery|GO:0043227,membrane-bounded organelle|GO:0043226,organelle|GO:0016607,nuclear speck|GO:0016604,nuclear body|GO:0031981,nuclear lumen|GO:0005618,cell wall|GO:0005634,nucleus|GO:0016020,membrane|GO:0005654,nucleoplasm|GO:0044451,nucleoplasm part|GO:0005737,cytoplasm|GO:0030312,external encapsulating stru…	GO:0035639,purine ribonucleoside triphosphate binding|GO:0005488,binding|GO:0003676,nucleic acid binding|GO:0043167,ion binding|GO:1901363,heterocyclic compound binding|GO:0001883,purine nucleoside binding|GO:0001882,nucleoside binding|GO:0043168,anion binding|GO:0016462,pyrophosphatase activity|GO:0000166,nucleotide binding|GO:0032561,guanyl ribonucleotide binding|GO:1901265,nucleoside phosphate…	ath03040,Spliceosome	http://www.uniprot.org/uniprot/Q9LNC5	FALSE
1027	2.05	14.79	33.7	gi|566178983	hypothetical protein POPTR_0007s01010g [Populus trichocarpa]	19	Populus trichocarpa	1.3804	0.6389	1.4859	0.5526	3.0479	0.3868	3.281	0.3472	2.2988	1.20088	81.84	0	O49447	AAC3	GO:0015931,nucleobase-containing compound transport|GO:0006862,nucleotide transport|GO:0015858,nucleoside transport|GO:0006820,anion transport|GO:0044699,single-organism process|GO:1901264,carbohydrate derivative transport|GO:0051716,cellular response to stimulus|GO:0043207,response to external biotic stimulus|GO:0051503,adenine nucleotide transport|GO:0051179,localization|GO:0071705,nitrogen com…	GO:0044464,cell part|GO:0031975,envelope|GO:0043229,intracellular organelle|GO:0043227,membrane-bounded organelle|GO:0043226,organelle|GO:0031224,intrinsic component of membrane|GO:0005737,cytoplasm|GO:0009941,chloroplast envelope|GO:0009536,plastid|GO:0031090,organelle membrane|GO:0016021,integral component of membrane|GO:0016020,membrane|GO:0044444,cytoplasmic part|GO:0005739,mitochondrion|GO:0…	GO:0005346,purine ribonucleotide transmembrane transporter activity|GO:0005347,ATP transmembrane transporter activity|GO:0015932,nucleobase-containing compound transmembrane transporter activity|GO:0015605,organophosphate ester transmembrane transporter activity|GO:0015291,secondary active transmembrane transporter activity|GO:0015215,nucleotide transmembrane transporter activity|GO:0015217,ADP t…		http://www.uniprot.org/uniprot/O49447	FALSE
184	11.8	12	42.6	gi|566179485	alcohol-dehydrogenase family protein [Populus trichocarpa]	8	Populus trichocarpa	1.4588	0.6722	1.6144	0.678	4.1305	0.4124	4.529	0.4152	2.93317	1.55246	59.36	8e-149	Q96533	ADH2	GO:0044710,single-organism metabolic process|GO:0071704,organic substance metabolic process|GO:0044699,single-organism process|GO:0006066,alcohol metabolic process|GO:0006067,ethanol metabolic process|GO:0044281,small molecule metabolic process|GO:0008152,metabolic process|GO:0034308,primary alcohol metabolic process|GO:1901615,organic hydroxy compound metabolic process|GO:0055114,oxidation-reduc…	GO:0005737,cytoplasm|GO:0044464,cell part|GO:0005623,cell|GO:0005622,intracellular|GO:0044424,intracellular part	GO:0005488,binding|GO:0043169,cation binding|GO:0016614,oxidoreductase activity, acting on CH-OH group of donors|GO:0046914,transition metal ion binding|GO:0016616,oxidoreductase activity, acting on the CH-OH group of donors, NAD or NADP as acceptor|GO:0004022,alcohol dehydrogenase (NAD) activity|GO:0043167,ion binding|GO:0003824,catalytic activity|GO:0008270,zinc ion binding|GO:0051903,S-(hydrox…	ath00350,Tyrosine metabolism|ath00010,Glycolysis / Gluconeogenesis|ath01200,Carbon metabolism|ath00071,Fatty acid degradation|ath01110,Biosynthesis of secondary metabolites|ath01100,Metabolic pathways	http://www.uniprot.org/uniprot/Q96533	FALSE
799	3.28	4.86	22.3	gi|566180686	hypothetical protein POPTR_0007s10970g [Populus trichocarpa]	10	Populus trichocarpa	5.7016	0.2361	4.8753	0.3145	1.5704	0.9878	1.1376	0.613	3.32123	1.73172	71.39	0	Q94AC3	At4g36960			GO:0097159,organic cyclic compound binding|GO:0000166,nucleotide binding|GO:0036094,small molecule binding|GO:0005488,binding|GO:0003676,nucleic acid binding|GO:1901363,heterocyclic compound binding|GO:1901265,nucleoside phosphate binding	ath03015,mRNA surveillance pathway	http://www.uniprot.org/uniprot/Q94AC3	FALSE
389	6.85	6.98	21.4	gi|566190935	hypothetical protein POPTR_0010s15200g [Populus trichocarpa]	6	Populus trichocarpa	1.3062	0.7628	1.4322	0.591	4.0551	0.4039	4.5709	0.3358	2.8411	1.50645	80.52	0	A8MS68	LPD1	GO:0006637,acyl-CoA metabolic process|GO:0006732,coenzyme metabolic process|GO:0019752,carboxylic acid metabolic process|GO:0042592,homeostatic process|GO:0044249,cellular biosynthetic process|GO:0042744,hydrogen peroxide catabolic process|GO:0009108,coenzyme biosynthetic process|GO:0044281,small molecule metabolic process|GO:0006090,pyruvate metabolic process|GO:0050789,regulation of biological …	GO:0031974,membrane-enclosed lumen|GO:0031975,envelope|GO:0043229,intracellular organelle|GO:0043228,non-membrane-bounded organelle|GO:0043227,membrane-bounded organelle|GO:0043226,organelle|GO:0005737,cytoplasm|GO:0009941,chloroplast envelope|GO:0009536,plastid|GO:0031981,nuclear lumen|GO:0005730,nucleolus|GO:0009570,chloroplast stroma|GO:0005634,nucleus|GO:0044435,plastid part|GO:0044434,chloro…	GO:0043168,anion binding|GO:0050662,coenzyme binding|GO:0050660,flavin adenine dinucleotide binding|GO:0005488,binding|GO:0097159,organic cyclic compound binding|GO:0000166,nucleotide binding|GO:0036094,small molecule binding|GO:0003824,catalytic activity|GO:0048037,cofactor binding|GO:0016651,oxidoreductase activity, acting on NAD(P)H|GO:0016667,oxidoreductase activity, acting on a sulfur group …	ath00630,Glyoxylate and dicarboxylate metabolism|ath00620,Pyruvate metabolism|ath00020,Citrate cycle (TCA cycle)|ath00260,Glycine, serine and threonine metabolism|ath00010,Glycolysis / Gluconeogenesis|ath00640,Propanoate metabolism|ath01200,Carbon metabolism|ath01110,Biosynthesis of secondary metabolites|ath01100,Metabolic pathways|ath00280,Valine, leucine and isoleucine degradation	http://www.uniprot.org/uniprot/A8MS68	FALSE
503	5.52	5.6	8.6	gi|566191175	hypothetical protein POPTR_0010s16580g [Populus trichocarpa]	3	Populus trichocarpa	1.5849	0.6009	1.8535	0.3809	3.1333	0.0311	3.4995	0.0361	2.5178	1.33216	71.99	0	Q9LMX4	PAP1	GO:0048583,regulation of response to stimulus|GO:0009074,aromatic amino acid family catabolic process|GO:0044281,small molecule metabolic process|GO:0044282,small molecule catabolic process|GO:0044283,small molecule biosynthetic process|GO:1901362,organic cyclic compound biosynthetic process|GO:1901360,organic cyclic compound metabolic process|GO:1901361,organic cyclic compound catabolic process|…	GO:0005576,extracellular region	GO:0016787,hydrolase activity|GO:0016791,phosphatase activity|GO:0043169,cation binding|GO:0016788,hydrolase activity, acting on ester bonds|GO:0043167,ion binding|GO:0042578,phosphoric ester hydrolase activity|GO:0003824,catalytic activity|GO:0005488,binding|GO:0046872,metal ion binding|GO:0003993,acid phosphatase activity		http://www.uniprot.org/uniprot/Q9LMX4	FALSE
806	3.17	3.29	14.2	gi|566209593	hypothetical protein POPTR_0016s10390g [Populus trichocarpa]	3	Populus trichocarpa	16.9044	0.1629	12.8233	0.1672	23.5505	0.1508	17.2187	0.1545	17.6242	4.13949	70.34	2e-149	Q0PGJ6	AKR4C9	GO:1901700,response to oxygen-containing compound|GO:0009628,response to abiotic stimulus|GO:0044710,single-organism metabolic process|GO:0042221,response to chemical|GO:0009414,response to water deprivation|GO:0050896,response to stimulus|GO:0009415,response to water|GO:0009636,response to toxic substance|GO:0006950,response to stress|GO:0006970,response to osmotic stress|GO:0055114,oxidation-re…	GO:0005737,cytoplasm|GO:0009536,plastid|GO:0043231,intracellular membrane-bounded organelle|GO:0044464,cell part|GO:0044444,cytoplasmic part|GO:0005623,cell|GO:0005622,intracellular|GO:0043229,intracellular organelle|GO:0044424,intracellular part|GO:0043227,membrane-bounded organelle|GO:0043226,organelle|GO:0009507,chloroplast	GO:0004033,aldo-keto reductase (NADP) activity|GO:0008106,alcohol dehydrogenase (NADP+) activity|GO:0050661,NADP binding|GO:0016614,oxidoreductase activity, acting on CH-OH group of donors|GO:0016616,oxidoreductase activity, acting on the CH-OH group of donors, NAD or NADP as acceptor|GO:0050662,coenzyme binding|GO:0048037,cofactor binding|GO:0097159,organic cyclic compound binding|GO:0000166,nuc…		http://www.uniprot.org/uniprot/Q0PGJ6	FALSE
791	3.35	3.49	9.7	gi|566215537	hypothetical protein POPTR_0018s12670g [Populus trichocarpa]	3	Populus trichocarpa	1.3677	0.8091	2.5823	0.2412	1.4859	0.9046	2.9376	0.3417	2.09337	1.06583	76.75	0	Q8RX87	RFS6	GO:0044238,primary metabolic process|GO:0005975,carbohydrate metabolic process|GO:0008152,metabolic process|GO:0071704,organic substance metabolic process		GO:0047274,galactinol-sucrose galactosyltransferase activity|GO:0003824,catalytic activity|GO:0016740,transferase activity|GO:0008378,galactosyltransferase activity|GO:0016757,transferase activity, transferring glycosyl groups|GO:0016758,transferase activity, transferring hexosyl groups	ath00052,Galactose metabolism	http://www.uniprot.org/uniprot/Q8RX87	FALSE
1523	1.49	1.75	9	gi|591403292	class III peroxidase [Populus trichocarpa]	3	Populus trichocarpa	1.8365	0.7255	1.4322	0.8251	3.02	0.6641	2.3988	0.7553	2.17188	1.11894	66.77	1e-134	Q9LE15	PER4	GO:0044248,cellular catabolic process|GO:0042744,hydrogen peroxide catabolic process|GO:0042743,hydrogen peroxide metabolic process|GO:0036294,cellular response to decreased oxygen levels|GO:0070887,cellular response to chemical stimulus|GO:0001666,response to hypoxia|GO:0044699,single-organism process|GO:0044712,single-organism catabolic process|GO:0044710,single-organism metabolic process|GO:00…	GO:0005576,extracellular region	GO:0043169,cation binding|GO:0046872,metal ion binding|GO:0020037,heme binding|GO:0046906,tetrapyrrole binding|GO:0097159,organic cyclic compound binding|GO:0016209,antioxidant activity|GO:0043167,ion binding|GO:1901363,heterocyclic compound binding|GO:0003824,catalytic activity|GO:0005488,binding|GO:0016684,oxidoreductase activity, acting on peroxide as acceptor|GO:0004601,peroxidase activity|GO…	ath00940,Phenylpropanoid biosynthesis|ath01100,Metabolic pathways|ath01110,Biosynthesis of secondary metabolites	http://www.uniprot.org/uniprot/Q9LE15	FALSE
1140	2.01	2.01	4	gi|743786332	PREDICTED: acylamino-acid-releasing enzyme [Populus euphratica]	1	Populus euphratica	2.5823	0.2833	8.091	0.139	0.2014	0.1481	0.5916	0.3212	2.86657	1.51933	65.03	0	Q84LM4	aare	GO:0044238,primary metabolic process|GO:0010038,response to metal ion|GO:0019538,protein metabolic process|GO:0050896,response to stimulus|GO:0043170,macromolecule metabolic process|GO:0071704,organic substance metabolic process|GO:0008152,metabolic process|GO:0042221,response to chemical|GO:0046686,response to cadmium ion|GO:0006508,proteolysis|GO:0010035,response to inorganic substance	GO:0005737,cytoplasm|GO:0005829,cytosol|GO:0009536,plastid|GO:0043231,intracellular membrane-bounded organelle|GO:0005773,vacuole|GO:0005634,nucleus|GO:0044464,cell part|GO:0044444,cytoplasmic part|GO:0005623,cell|GO:0005622,intracellular|GO:0043229,intracellular organelle|GO:0044424,intracellular part|GO:0043227,membrane-bounded organelle|GO:0043226,organelle|GO:0009507,chloroplast	GO:0004177,aminopeptidase activity|GO:0017171,serine hydrolase activity|GO:0016787,hydrolase activity|GO:0003824,catalytic activity|GO:0008238,exopeptidase activity|GO:0070011,peptidase activity, acting on L-amino acid peptides|GO:0070009,serine-type aminopeptidase activity|GO:0070008,serine-type exopeptidase activity|GO:0008233,peptidase activity|GO:0008236,serine-type peptidase activity		http://www.uniprot.org/uniprot/Q84LM4	FALSE
1270	2	2.01	8.8	gi|743787097	PREDICTED: thioredoxin-like 4, chloroplastic isoform X2 [Populus euphratica]	1	Populus euphratica	4.7863	0.4005	3.9811	0.5349	0.52	0.657	0.3767	0.4768	2.41602	1.27264	77.78	8e-77	Q9C5C5	At1g07700	GO:0044237,cellular metabolic process|GO:0018904,ether metabolic process|GO:0046173,polyol biosynthetic process|GO:0019751,polyol metabolic process|GO:0042592,homeostatic process|GO:0044281,small molecule metabolic process|GO:0044283,small molecule biosynthetic process|GO:0050789,regulation of biological process|GO:0044699,single-organism process|GO:1901576,organic substance biosynthetic process|…	GO:0005737,cytoplasm|GO:0009536,plastid|GO:0043231,intracellular membrane-bounded organelle|GO:0009532,plastid stroma|GO:0009570,chloroplast stroma|GO:0044464,cell part|GO:0044444,cytoplasmic part|GO:0005623,cell|GO:0005622,intracellular|GO:0044446,intracellular organelle part|GO:0043229,intracellular organelle|GO:0044435,plastid part|GO:0044434,chloroplast part|GO:0044424,intracellular part|GO:0…	GO:0003824,catalytic activity|GO:0016667,oxidoreductase activity, acting on a sulfur group of donors|GO:0015036,disulfide oxidoreductase activity|GO:0015035,protein disulfide oxidoreductase activity|GO:0016491,oxidoreductase activity		http://www.uniprot.org/uniprot/Q9C5C5	FALSE
1269	2	2.01	9.8	gi|743789289	PREDICTED: remorin [Populus euphratica]	1	Populus euphratica	2.1478	0.2988	2.5823	0.2472	2.466	0.2578	2.9648	0.218	2.54022	1.34496	66.08	5e-68	Q9M2D8	At3g61260		GO:0005737,cytoplasm|GO:0043231,intracellular membrane-bounded organelle|GO:0005773,vacuole|GO:0016020,membrane|GO:0044464,cell part|GO:0044444,cytoplasmic part|GO:0005623,cell|GO:0005622,intracellular|GO:0055044,symplast|GO:0043229,intracellular organelle|GO:0071944,cell periphery|GO:0030054,cell junction|GO:0005911,cell-cell junction|GO:0005886,plasma membrane|GO:0044424,intracellular part|GO:0…			http://www.uniprot.org/uniprot/Q9M2D8	FALSE
1535	1.43	1.88	8	gi|743792771	PREDICTED: probable alanine--tRNA ligase, chloroplastic isoform X6 [Populus euphratica]	3	Populus euphratica	1.2942	0.7446	1.6749	0.3732	2.208	0.5019	2.9376	0.2556	2.02868	1.02054	77.91	0	Q9FFC7	EMB86	GO:0044707,single-multicellular organism process|GO:0061458,reproductive system development|GO:0019752,carboxylic acid metabolic process|GO:0009791,post-embryonic development|GO:0009790,embryo development|GO:0009793,embryo development ending in seed dormancy|GO:0006807,nitrogen compound metabolic process|GO:0044281,small molecule metabolic process|GO:0034645,cellular macromolecule biosynthetic pr…	GO:0005737,cytoplasm|GO:0009536,plastid|GO:0043231,intracellular membrane-bounded organelle|GO:0009532,plastid stroma|GO:0009570,chloroplast stroma|GO:0016020,membrane|GO:0044464,cell part|GO:0044444,cytoplasmic part|GO:0005739,mitochondrion|GO:0005622,intracellular|GO:0044446,intracellular organelle part|GO:0043229,intracellular organelle|GO:0005623,cell|GO:0044435,plastid part|GO:0044434,chloro…	GO:0035639,purine ribonucleoside triphosphate binding|GO:0008270,zinc ion binding|GO:0003676,nucleic acid binding|GO:0043167,ion binding|GO:1901363,heterocyclic compound binding|GO:1901265,nucleoside phosphate binding|GO:0001882,nucleoside binding|GO:0043168,anion binding|GO:0043169,cation binding|GO:0004813,alanine-tRNA ligase activity|GO:0004812,aminoacyl-tRNA ligase activity|GO:0046914,transit…	ath00970,Aminoacyl-tRNA biosynthesis	http://www.uniprot.org/uniprot/Q9FFC7	FALSE
29	32.1	32.13	58.2	gi|743792934	PREDICTED: V-type proton ATPase subunit B 2 isoform X2 [Populus euphratica]	34	Populus euphratica	2.8054	0.0707	2.5586	0.076	1.5417	0.3794	1.406	0.3839	2.07793	1.05514	96.72	0	Q9SZN1	VHA-B2	GO:1902600,hydrogen ion transmembrane transport|GO:0009141,nucleoside triphosphate metabolic process|GO:0009144,purine nucleoside triphosphate metabolic process|GO:0009167,purine ribonucleoside monophosphate metabolic process|GO:0034641,cellular nitrogen compound metabolic process|GO:0006807,nitrogen compound metabolic process|GO:0044281,small molecule metabolic process|GO:0009161,ribonucleoside …	GO:0043229,intracellular organelle|GO:0043227,membrane-bounded organelle|GO:0043226,organelle|GO:0005737,cytoplasm|GO:0044446,intracellular organelle part|GO:0031090,organelle membrane|GO:0005773,vacuole|GO:0098805,whole membrane|GO:0016020,membrane|GO:0005774,vacuolar membrane|GO:0033180,proton-transporting V-type ATPase, V1 domain|GO:0044437,vacuolar part|GO:0098588,bounding membrane of organel…	GO:0035639,purine ribonucleoside triphosphate binding|GO:0005488,binding|GO:0043167,ion binding|GO:1901363,heterocyclic compound binding|GO:1901265,nucleoside phosphate binding|GO:0001882,nucleoside binding|GO:0043168,anion binding|GO:0016820,hydrolase activity, acting on acid anhydrides, catalyzing transmembrane movement of substances|GO:0000166,nucleotide binding|GO:0001883,purine nucleoside bi…	ath00190,Oxidative phosphorylation|ath04145,Phagosome|ath01100,Metabolic pathways	http://www.uniprot.org/uniprot/Q9SZN1	FALSE
931	2.31	23.86	32.2	gi|743794407	PREDICTED: presequence protease 1, chloroplastic/mitochondrial isoform X2 [Populus euphratica]	31	Populus euphratica	2.6062	0.3581	2.355	0.5439	2.5823	0.7688	2.3121	0.9133	2.4639	1.30094	80.44	0	Q9LJL3	PREP1	GO:0048440,carpel development|GO:0048467,gynoecium development|GO:0010038,response to metal ion|GO:0048569,post-embryonic organ development|GO:0009791,post-embryonic development|GO:0042744,hydrogen peroxide catabolic process|GO:0042743,hydrogen peroxide metabolic process|GO:0048481,ovule development|GO:0048827,phyllome development|GO:0007275,multicellular organismal development|GO:0044699,single-…	GO:0031974,membrane-enclosed lumen|GO:0031975,envelope|GO:0048046,apoplast|GO:0043229,intracellular organelle|GO:0043227,membrane-bounded organelle|GO:0043226,organelle|GO:0005737,cytoplasm|GO:0009941,chloroplast envelope|GO:0009536,plastid|GO:0009532,plastid stroma|GO:0009570,chloroplast stroma|GO:0005739,mitochondrion|GO:0044435,plastid part|GO:0044434,chloroplast part|GO:0005759,mitochondrial …	GO:0016787,hydrolase activity|GO:0004175,endopeptidase activity|GO:0004222,metalloendopeptidase activity|GO:0046914,transition metal ion binding|GO:0043169,cation binding|GO:0043167,ion binding|GO:0003824,catalytic activity|GO:0070011,peptidase activity, acting on L-amino acid peptides|GO:0008270,zinc ion binding|GO:0005515,protein binding|GO:0008233,peptidase activity|GO:0046872,metal ion bindin…		http://www.uniprot.org/uniprot/Q9LJL3	FALSE
351	7.86	7.92	16.3	gi|743795533	PREDICTED: LL-diaminopimelate aminotransferase, chloroplastic [Populus euphratica]	7	Populus euphratica	2.6546	0.0364	2.208	0.0195	3.1046	0.0373	2.5823	0.0711	2.63738	1.3991	82.3	0	Q93ZN9	DAP	GO:0042221,response to chemical|GO:0009607,response to biotic stimulus|GO:0044238,primary metabolic process|GO:0009692,ethylene metabolic process|GO:0006950,response to stress|GO:0009627,systemic acquired resistance|GO:0044283,small molecule biosynthetic process|GO:0019752,carboxylic acid metabolic process|GO:0016053,organic acid biosynthetic process|GO:0044249,cellular biosynthetic process|GO:00…	GO:0005737,cytoplasm|GO:0009536,plastid|GO:0043231,intracellular membrane-bounded organelle|GO:0009532,plastid stroma|GO:0009570,chloroplast stroma|GO:0005829,cytosol|GO:0044464,cell part|GO:0044444,cytoplasmic part|GO:0005623,cell|GO:0005622,intracellular|GO:0044446,intracellular organelle part|GO:0043229,intracellular organelle|GO:0044435,plastid part|GO:0044434,chloroplast part|GO:0044424,intr…	GO:0043168,anion binding|GO:0043169,cation binding|GO:0046872,metal ion binding|GO:0046914,transition metal ion binding|GO:0003824,catalytic activity|GO:0010285,L,L-diaminopimelate aminotransferase activity|GO:0097159,organic cyclic compound binding|GO:0043167,ion binding|GO:1901363,heterocyclic compound binding|GO:0008483,transaminase activity|GO:0016740,transferase activity|GO:0048037,cofactor …	ath01110,Biosynthesis of secondary metabolites|ath01230,Biosynthesis of amino acids|ath00300,Lysine biosynthesis|ath01100,Metabolic pathways	http://www.uniprot.org/uniprot/Q93ZN9	FALSE
813	3.09	3.24	14.1	gi|743796298	PREDICTED: uncharacterized protein LOC105111212 [Populus euphratica]	6	Populus euphratica	2.1478	0.4169	2.2909	0.3616	1.977	0.4177	2.1086	0.3622	2.13108	1.09158	57.41	7e-34	O24520	AHB1	GO:0009628,response to abiotic stimulus|GO:0019222,regulation of metabolic process|GO:0009627,systemic acquired resistance|GO:0031323,regulation of cellular metabolic process|GO:0071229,cellular response to acid chemical|GO:0023052,signaling|GO:0007165,signal transduction|GO:0070887,cellular response to chemical stimulus|GO:0042221,response to chemical|GO:0001666,response to hypoxia|GO:0050789,re…	GO:0005737,cytoplasm|GO:0005618,cell wall|GO:0005829,cytosol|GO:0016020,membrane|GO:0044464,cell part|GO:0005623,cell|GO:0030312,external encapsulating structure|GO:0055044,symplast|GO:0044444,cytoplasmic part|GO:0071944,cell periphery|GO:0009506,plasmodesma|GO:0005911,cell-cell junction|GO:0005886,plasma membrane|GO:0044424,intracellular part|GO:0005622,intracellular|GO:0030054,cell junction	GO:0043169,cation binding|GO:0005344,oxygen transporter activity|GO:0022892,substrate-specific transporter activity|GO:0046914,transition metal ion binding|GO:0020037,heme binding|GO:0046906,tetrapyrrole binding|GO:0005215,transporter activity|GO:0043167,ion binding|GO:0019825,oxygen binding|GO:0005488,binding|GO:0097159,organic cyclic compound binding|GO:0005506,iron ion binding|GO:0046872,metal…		http://www.uniprot.org/uniprot/O24520	FALSE
435	6.15	11.92	19.7	gi|743796608	PREDICTED: 5-methyltetrahydropteroyltriglutamate--homocysteine methyltransferase-like [Populus euphratica]	10	Populus euphratica	9.5499	0.1089	8.2414	0.1164	1.6904	0.4047	1.4454	0.508	5.23177	2.3873	88.89	0	O50008	MS1	GO:0009628,response to abiotic stimulus|GO:0010038,response to metal ion|GO:0006950,response to stress|GO:1990267,response to transition metal nanoparticle|GO:0019752,carboxylic acid metabolic process|GO:0044249,cellular biosynthetic process|GO:0006807,nitrogen compound metabolic process|GO:0009067,aspartate family amino acid biosynthetic process|GO:0009066,aspartate family amino acid metabolic p…	GO:0048046,apoplast|GO:0042579,microbody|GO:0043229,intracellular organelle|GO:0071944,cell periphery|GO:0043227,membrane-bounded organelle|GO:0043226,organelle|GO:0030054,cell junction|GO:0005737,cytoplasm|GO:0009536,plastid|GO:0031090,organelle membrane|GO:0009532,plastid stroma|GO:0005773,vacuole|GO:0009570,chloroplast stroma|GO:0098805,whole membrane|GO:0016020,membrane|GO:0005777,peroxisome|…	GO:0043169,cation binding|GO:0005507,copper ion binding|GO:0046914,transition metal ion binding|GO:0046872,metal ion binding|GO:0042084,5-methyltetrahydrofolate-dependent methyltransferase activity|GO:0042085,5-methyltetrahydropteroyltri-L-glutamate-dependent methyltransferase activity|GO:0043167,ion binding|GO:0008172,S-methyltransferase activity|GO:0003824,catalytic activity|GO:0016740,transfer…	ath00270,Cysteine and methionine metabolism|ath01110,Biosynthesis of secondary metabolites|ath01230,Biosynthesis of amino acids|ath00450,Selenocompound metabolism|ath01100,Metabolic pathways	http://www.uniprot.org/uniprot/O50008	FALSE
455	6.02	6.08	15.9	gi|743803571	PREDICTED: D-3-phosphoglycerate dehydrogenase 3, chloroplastic-like [Populus euphratica]	6	Populus euphratica	1.3932	0.0771	2.4434	0.1745	2.2909	0.0663	4.0926	0.1799	2.55502	1.35334	78.31	0	O49485	PGDH1	GO:0044707,single-multicellular organism process|GO:0061458,reproductive system development|GO:0019752,carboxylic acid metabolic process|GO:0009791,post-embryonic development|GO:0009790,embryo development|GO:0009793,embryo development ending in seed dormancy|GO:0006807,nitrogen compound metabolic process|GO:0044281,small molecule metabolic process|GO:0044283,small molecule biosynthetic process|GO…	GO:0043229,intracellular organelle|GO:0043227,membrane-bounded organelle|GO:0043226,organelle|GO:0005737,cytoplasm|GO:0044446,intracellular organelle part|GO:0009536,plastid|GO:0009532,plastid stroma|GO:0009570,chloroplast stroma|GO:0016020,membrane|GO:0005739,mitochondrion|GO:0044435,plastid part|GO:0044434,chloroplast part|GO:0009507,chloroplast|GO:0043231,intracellular membrane-bounded organel…	GO:0035639,purine ribonucleoside triphosphate binding|GO:0051287,NAD binding|GO:0005488,binding|GO:0043167,ion binding|GO:0016597,amino acid binding|GO:1901363,heterocyclic compound binding|GO:1901265,nucleoside phosphate binding|GO:0001882,nucleoside binding|GO:0043168,anion binding|GO:0050662,coenzyme binding|GO:0000166,nucleotide binding|GO:0004617,phosphoglycerate dehydrogenase activity|GO:00…	ath00260,Glycine, serine and threonine metabolism|ath01100,Metabolic pathways|ath01200,Carbon metabolism|ath01230,Biosynthesis of amino acids	http://www.uniprot.org/uniprot/O49485	FALSE
1085	2.02	2.03	7.9	gi|743804902	PREDICTED: 3-phosphoshikimate 1-carboxyvinyltransferase 2-like [Populus euphratica]	3	Populus euphratica	2.704	0.492	1.4723	0.631	3.5975	0.5088	2.1281	0.6551	2.47548	1.30771	76.53	0	P05466	At2g45300	GO:0044238,primary metabolic process|GO:0019752,carboxylic acid metabolic process|GO:0044249,cellular biosynthetic process|GO:0006807,nitrogen compound metabolic process|GO:0044281,small molecule metabolic process|GO:0044283,small molecule biosynthetic process|GO:1901362,organic cyclic compound biosynthetic process|GO:0044699,single-organism process|GO:1901576,organic substance biosynthetic proce…	GO:0005737,cytoplasm|GO:0009536,plastid|GO:0043231,intracellular membrane-bounded organelle|GO:0009532,plastid stroma|GO:0009570,chloroplast stroma|GO:0005829,cytosol|GO:0044464,cell part|GO:0044444,cytoplasmic part|GO:0005623,cell|GO:0005622,intracellular|GO:0044446,intracellular organelle part|GO:0043229,intracellular organelle|GO:0044435,plastid part|GO:0044434,chloroplast part|GO:0044424,intr…	GO:0016765,transferase activity, transferring alkyl or aryl (other than methyl) groups|GO:0016740,transferase activity|GO:0003824,catalytic activity|GO:0003866,3-phosphoshikimate 1-carboxyvinyltransferase activity	ath01110,Biosynthesis of secondary metabolites|ath00400,Phenylalanine, tyrosine and tryptophan biosynthesis|ath01100,Metabolic pathways|ath01230,Biosynthesis of amino acids	http://www.uniprot.org/uniprot/P05466	FALSE
1325	2	2	15.9	gi|743812162	PREDICTED: universal stress protein A-like protein [Populus euphratica]	1	Populus euphratica	2.3335	0.2724	2.6303	0.2428	1.7061	0.3958	1.9231	0.3391	2.14825	1.10316	70.19	3e-68	Q9M328	F5K20_290	GO:0009628,response to abiotic stimulus|GO:0050896,response to stimulus|GO:0006950,response to stress|GO:0008152,metabolic process|GO:0009266,response to temperature stimulus|GO:0009409,response to cold	GO:0016020,membrane|GO:0044464,cell part|GO:0005623,cell|GO:0055044,symplast|GO:0071944,cell periphery|GO:0009506,plasmodesma|GO:0005911,cell-cell junction|GO:0005886,plasma membrane|GO:0030054,cell junction	GO:0016787,hydrolase activity|GO:0003824,catalytic activity		http://www.uniprot.org/uniprot/Q9M328	FALSE
596	4.29	12.52	25.2	gi|743814108	PREDICTED: aspartate aminotransferase, cytoplasmic [Populus euphratica]	11	Populus euphratica	4.6132	0.3119	3.9084	0.3322	2.2909	0.4227	1.8707	0.4579	3.1708	1.66485	83.06	0	P46644	ASP3	GO:0022622,root system development|GO:0034440,lipid oxidation|GO:0048589,developmental growth|GO:0048588,developmental cell growth|GO:0048468,cell development|GO:0048469,cell maturation|GO:0043449,cellular alkene metabolic process|GO:0044281,small molecule metabolic process|GO:0044282,small molecule catabolic process|GO:0009693,ethylene biosynthetic process|GO:0071840,cellular component organizat…	GO:0005737,cytoplasm|GO:0009536,plastid|GO:0043231,intracellular membrane-bounded organelle|GO:0044464,cell part|GO:0005829,cytosol|GO:0016020,membrane|GO:0005777,peroxisome|GO:0044444,cytoplasmic part|GO:0005623,cell|GO:0005622,intracellular|GO:0042579,microbody|GO:0043229,intracellular organelle|GO:0044424,intracellular part|GO:0043227,membrane-bounded organelle|GO:0043226,organelle|GO:0009507,…	GO:0043168,anion binding|GO:0008483,transaminase activity|GO:0097159,organic cyclic compound binding|GO:0003824,catalytic activity|GO:0070546,L-phenylalanine aminotransferase activity|GO:1901363,heterocyclic compound binding|GO:0004069,L-aspartate:2-oxoglutarate aminotransferase activity|GO:0016740,transferase activity|GO:0048037,cofactor binding|GO:0080130,L-phenylalanine:2-oxoglutarate aminotra…	ath01230,Biosynthesis of amino acids|ath00400,Phenylalanine, tyrosine and tryptophan biosynthesis|ath00220,Arginine biosynthesis|ath00270,Cysteine and methionine metabolism|ath01210,2-Oxocarboxylic acid metabolism|ath00350,Tyrosine metabolism|ath00950,Isoquinoline alkaloid biosynthesis|ath00360,Phenylalanine metabolism|ath01100,Metabolic pathways|ath00710,Carbon fixation in photosynthetic organis…	http://www.uniprot.org/uniprot/P46644	FALSE
1139	2.01	2.01	6.8	gi|743817669	PREDICTED: cysteine proteinase inhibitor 6-like [Populus euphratica]	2	Populus euphratica	1.9231	0.4311	3.9811	0.1681	1.9953	0.4056	4.2073	0.1636	3.0267	1.59775	71.22	2e-102	Q8H0X6	CYS6	GO:0009628,response to abiotic stimulus|GO:0009892,negative regulation of metabolic process|GO:0080090,regulation of primary metabolic process|GO:0019222,regulation of metabolic process|GO:0031324,negative regulation of cellular metabolic process|GO:0031323,regulation of cellular metabolic process|GO:0009409,response to cold|GO:0006972,hyperosmotic response|GO:0009414,response to water deprivatio…	GO:0005737,cytoplasm|GO:0005783,endoplasmic reticulum|GO:0005829,cytosol|GO:0044464,cell part|GO:0044444,cytoplasmic part|GO:0005623,cell|GO:0005622,intracellular|GO:0043229,intracellular organelle|GO:0005576,extracellular region|GO:0012505,endomembrane system|GO:0044424,intracellular part|GO:0043227,membrane-bounded organelle|GO:0043226,organelle|GO:0043231,intracellular membrane-bounded organel…	GO:0043169,cation binding|GO:0050897,cobalt ion binding|GO:0004866,endopeptidase inhibitor activity|GO:0046914,transition metal ion binding|GO:0061135,endopeptidase regulator activity|GO:0061134,peptidase regulator activity|GO:0043167,ion binding|GO:0046872,metal ion binding|GO:0005515,protein binding|GO:0030414,peptidase inhibitor activity|GO:0004869,cysteine-type endopeptidase inhibitor activit…		http://www.uniprot.org/uniprot/Q8H0X6	FALSE
210	11.03	11.15	34.4	gi|743819545	PREDICTED: uncharacterized protein LOC105123107 [Populus euphratica]	11	Populus euphratica	2.704	0.4148	2.4434	0.4819	1.5849	0.492	1.3677	0.5812	2.025	1.01792	83.41	0	Q9LYR4	T22N19_70	GO:0009167,purine ribonucleoside monophosphate metabolic process|GO:0044281,small molecule metabolic process|GO:0009161,ribonucleoside monophosphate metabolic process|GO:0009698,phenylpropanoid metabolic process|GO:0009699,phenylpropanoid biosynthetic process|GO:1901360,organic cyclic compound metabolic process|GO:0044712,single-organism catabolic process|GO:0044710,single-organism metabolic proc…	GO:0005737,cytoplasm|GO:0009536,plastid|GO:0043231,intracellular membrane-bounded organelle|GO:0009532,plastid stroma|GO:0009570,chloroplast stroma|GO:0005829,cytosol|GO:0044464,cell part|GO:0044444,cytoplasmic part|GO:0005739,mitochondrion|GO:0005622,intracellular|GO:0044446,intracellular organelle part|GO:0043229,intracellular organelle|GO:0005623,cell|GO:0044435,plastid part|GO:0044434,chlorop…	GO:0003824,catalytic activity|GO:0016740,transferase activity|GO:0004801,sedoheptulose-7-phosphate:D-glyceraldehyde-3-phosphate glyceronetransferase activity|GO:0016744,transferase activity, transferring aldehyde or ketonic groups	ath00030,Pentose phosphate pathway|ath01230,Biosynthesis of amino acids|ath01100,Metabolic pathways|ath01200,Carbon metabolism|ath01110,Biosynthesis of secondary metabolites	http://www.uniprot.org/uniprot/Q9LYR4	FALSE
1031	2.05	2.08	4.5	gi|743829732	PREDICTED: mitochondrial Rho GTPase 1-like [Populus euphratica]	1	Populus euphratica	1.1912	0.5767	1.1066	0.9849	3.6983	0.1329	3.5318	0.21	2.38198	1.25216	74.05	0	Q8RXF8	MIRO1	GO:0044238,primary metabolic process|GO:0048589,developmental growth|GO:0048588,developmental cell growth|GO:2000241,regulation of reproductive process|GO:0048468,cell development|GO:0048580,regulation of post-embryonic development|GO:0007292,female gamete generation|GO:0043933,macromolecular complex subunit organization|GO:0008104,protein localization|GO:0007165,signal transduction|GO:0051641,ce…	GO:0098573,intrinsic component of mitochondrial membrane|GO:0019867,outer membrane|GO:0043229,intracellular organelle|GO:0031306,intrinsic component of mitochondrial outer membrane|GO:0031301,integral component of organelle membrane|GO:0031300,intrinsic component of organelle membrane|GO:0032592,integral component of mitochondrial membrane|GO:0043227,membrane-bounded organelle|GO:0043226,organell…	GO:0035639,purine ribonucleoside triphosphate binding|GO:0005488,binding|GO:0043167,ion binding|GO:1901363,heterocyclic compound binding|GO:1901265,nucleoside phosphate binding|GO:0001882,nucleoside binding|GO:0043168,anion binding|GO:0043169,cation binding|GO:0016462,pyrophosphatase activity|GO:0000166,nucleotide binding|GO:0032561,guanyl ribonucleotide binding|GO:0001883,purine nucleoside bindi…		http://www.uniprot.org/uniprot/Q8RXF8	FALSE
603	4.23	4.26	22.2	gi|743830902	PREDICTED: germin-like protein 5-1 [Populus euphratica]	2	Populus euphratica	3.4041	0.8065	3.5975	0.7698	2.1677	0.7678	2.5119	0.7328	2.9203	1.54612	70.73	2e-104	P94014	GLP4	GO:0022622,root system development|GO:0006820,anion transport|GO:0044707,single-multicellular organism process|GO:0051716,cellular response to stimulus|GO:0043207,response to external biotic stimulus|GO:0048513,organ development|GO:0009266,response to temperature stimulus|GO:0015849,organic acid transport|GO:0015711,organic anion transport|GO:0010035,response to inorganic substance|GO:0051707,res…	GO:0005737,cytoplasm|GO:0048046,apoplast|GO:0043231,intracellular membrane-bounded organelle|GO:0005618,cell wall|GO:0005634,nucleus|GO:0044464,cell part|GO:0005623,cell|GO:0030312,external encapsulating structure|GO:0055044,symplast|GO:0043229,intracellular organelle|GO:0071944,cell periphery|GO:0030054,cell junction|GO:0005911,cell-cell junction|GO:0044424,intracellular part|GO:0005622,intracel…	GO:0043169,cation binding|GO:0046914,transition metal ion binding|GO:0030145,manganese ion binding|GO:0043167,ion binding|GO:0005488,binding|GO:0045735,nutrient reservoir activity|GO:0046872,metal ion binding		http://www.uniprot.org/uniprot/P94014	FALSE
336	8.01	8.23	21.6	gi|743831900	PREDICTED: dnaJ protein homolog [Populus euphratica]	9	Populus euphratica	3.9811	0.1994	3.5645	0.3198	2.704	0.2165	2.3988	0.351	3.1621	1.66088	79.48	0	Q94AW8	ATJ3	GO:0050896,response to stimulus|GO:0009628,response to abiotic stimulus|GO:0006457,protein folding|GO:0034645,cellular macromolecule biosynthetic process|GO:0019222,regulation of metabolic process|GO:0061458,reproductive system development|GO:2000243,positive regulation of reproductive process|GO:2000241,regulation of reproductive process|GO:0018377,protein myristoylation|GO:0048582,positive regu…	GO:0031974,membrane-enclosed lumen|GO:0043229,intracellular organelle|GO:0043228,non-membrane-bounded organelle|GO:0043227,membrane-bounded organelle|GO:0043226,organelle|GO:0030054,cell junction|GO:0005737,cytoplasm|GO:0031981,nuclear lumen|GO:0005730,nucleolus|GO:0005618,cell wall|GO:0005634,nucleus|GO:0016020,membrane|GO:0030312,external encapsulating structure|GO:0055044,symplast|GO:0005911,c…	GO:0035639,purine ribonucleoside triphosphate binding|GO:0031072,heat shock protein binding|GO:0005488,binding|GO:0000166,nucleotide binding|GO:1901363,heterocyclic compound binding|GO:1901265,nucleoside phosphate binding|GO:0001882,nucleoside binding|GO:0043168,anion binding|GO:0043169,cation binding|GO:0051087,chaperone binding|GO:0051082,unfolded protein binding|GO:0043167,ion binding|GO:00018…	ath04141,Protein processing in endoplasmic reticulum	http://www.uniprot.org/uniprot/Q94AW8	FALSE
958	2.23	2.28	17.7	gi|743836602	PREDICTED: cathepsin B-like [Populus euphratica]	4	Populus euphratica	2.3121	0.3184	3.1333	0.2749	3.8726	0.2594	5.7016	0.2291	3.7549	1.90877	76.45	0	Q93VC9	At1g02305	GO:0044238,primary metabolic process|GO:0019222,regulation of metabolic process|GO:0019538,protein metabolic process|GO:0050790,regulation of catalytic activity|GO:0043170,macromolecule metabolic process|GO:0071704,organic substance metabolic process|GO:0065007,biological regulation|GO:0008152,metabolic process|GO:0006508,proteolysis|GO:0065009,regulation of molecular function|GO:0050789,regulati…	GO:0005737,cytoplasm|GO:0043231,intracellular membrane-bounded organelle|GO:0005773,vacuole|GO:0005829,cytosol|GO:0044464,cell part|GO:0044444,cytoplasmic part|GO:0005623,cell|GO:0005622,intracellular|GO:0043229,intracellular organelle|GO:0044424,intracellular part|GO:0043227,membrane-bounded organelle|GO:0043226,organelle	GO:0016787,hydrolase activity|GO:0004175,endopeptidase activity|GO:0070011,peptidase activity, acting on L-amino acid peptides|GO:0003824,catalytic activity|GO:0004197,cysteine-type endopeptidase activity|GO:0008233,peptidase activity|GO:0008234,cysteine-type peptidase activity		http://www.uniprot.org/uniprot/Q93VC9	FALSE
1277	2	2	3.1	gi|743850206	PREDICTED: transportin-3-like [Populus euphratica]	1	Populus euphratica	2.3768	0.2685	3.5975	0.1881	0.9908	0.9932	1.4997	0.4789	2.1162	1.08148	73.67	0	Q8GUL2	At5g62590	GO:0034504,protein localization to nucleus|GO:0051169,nuclear transport|GO:0008104,protein localization|GO:0080090,regulation of primary metabolic process|GO:0019222,regulation of metabolic process|GO:0031323,regulation of cellular metabolic process|GO:0090304,nucleic acid metabolic process|GO:0034641,cellular nitrogen compound metabolic process|GO:0006807,nitrogen compound metabolic process|GO:0…	GO:0043231,intracellular membrane-bounded organelle|GO:0005634,nucleus|GO:0044464,cell part|GO:0005623,cell|GO:0005622,intracellular|GO:0043229,intracellular organelle|GO:0044424,intracellular part|GO:0043227,membrane-bounded organelle|GO:0043226,organelle	GO:0008536,Ran GTPase binding|GO:0019899,enzyme binding|GO:0017016,Ras GTPase binding|GO:0031267,small GTPase binding|GO:0051020,GTPase binding|GO:0005488,binding|GO:0005515,protein binding		http://www.uniprot.org/uniprot/Q8GUL2	FALSE
962	2.21	2.47	23.9	gi|743852770	PREDICTED: monodehydroascorbate reductase, chloroplastic [Populus euphratica]	10	Populus euphratica	1.977	0.498	2.1478	0.4375	1.8707	0.4712	2.0137	0.4158	2.0023	1.00166	77.51	0	P92947	At1g63940	GO:0008152,metabolic process|GO:0044248,cellular catabolic process|GO:0042744,hydrogen peroxide catabolic process|GO:0042743,hydrogen peroxide metabolic process|GO:0044699,single-organism process|GO:0044712,single-organism catabolic process|GO:0044710,single-organism metabolic process|GO:0046686,response to cadmium ion|GO:0009987,cellular process|GO:0072593,reactive oxygen species metabolic proce…	GO:0031975,envelope|GO:0043229,intracellular organelle|GO:0043227,membrane-bounded organelle|GO:0043226,organelle|GO:0005737,cytoplasm|GO:0009536,plastid|GO:0009532,plastid stroma|GO:0009570,chloroplast stroma|GO:0010319,stromule|GO:0005739,mitochondrion|GO:0044435,plastid part|GO:0044434,chloroplast part|GO:0031967,organelle envelope|GO:0009507,chloroplast|GO:0009526,plastid envelope|GO:0043231,…	GO:0035639,purine ribonucleoside triphosphate binding|GO:0005488,binding|GO:0000166,nucleotide binding|GO:1901363,heterocyclic compound binding|GO:1901265,nucleoside phosphate binding|GO:0001882,nucleoside binding|GO:0043168,anion binding|GO:0050662,coenzyme binding|GO:0050660,flavin adenine dinucleotide binding|GO:0043167,ion binding|GO:0001883,purine nucleoside binding|GO:0032549,ribonucleoside…	ath00053,Ascorbate and aldarate metabolism|ath01100,Metabolic pathways	http://www.uniprot.org/uniprot/P92947	FALSE
1495	1.61	1.86	9	gi|743853526	PREDICTED: ribokinase-like [Populus euphratica]	2	Populus euphratica	1.1169	0.8139	5.0582	0.1504	0.3311	0.2185	1.4997	0.4826	2.00148	1.00106	76.78	2e-165	A1A6H3	At1g17160	GO:0019321,pentose metabolic process|GO:0044238,primary metabolic process|GO:0044710,single-organism metabolic process|GO:0009987,cellular process|GO:0044262,cellular carbohydrate metabolic process|GO:0005996,monosaccharide metabolic process|GO:0006793,phosphorus metabolic process|GO:0016310,phosphorylation|GO:0044237,cellular metabolic process|GO:0046835,carbohydrate phosphorylation|GO:0071704,o…	GO:0005737,cytoplasm|GO:0009536,plastid|GO:0043231,intracellular membrane-bounded organelle|GO:0009532,plastid stroma|GO:0009570,chloroplast stroma|GO:0044464,cell part|GO:0044444,cytoplasmic part|GO:0005623,cell|GO:0005622,intracellular|GO:0044446,intracellular organelle part|GO:0043229,intracellular organelle|GO:0044435,plastid part|GO:0044434,chloroplast part|GO:0044424,intracellular part|GO:0…	GO:0019200,carbohydrate kinase activity|GO:0016773,phosphotransferase activity, alcohol group as acceptor|GO:0016772,transferase activity, transferring phosphorus-containing groups|GO:0016301,kinase activity|GO:0003824,catalytic activity|GO:0016740,transferase activity|GO:0004747,ribokinase activity	ath00030,Pentose phosphate pathway|ath01100,Metabolic pathways	http://www.uniprot.org/uniprot/A1A6H3	FALSE
49	25.24	25.38	25.6	gi|743862321	PREDICTED: plasma membrane ATPase 4-like [Populus euphratica]	15	Populus euphratica	1.1376	0.2158	1.5276	0.1326	2.5823	0.0988	3.6308	0.0588	2.21957	1.15028	87.43	0	Q9SJB3	AHA5	GO:0009167,purine ribonucleoside monophosphate metabolic process|GO:0009165,nucleotide biosynthetic process|GO:0009163,nucleoside biosynthetic process|GO:0009161,ribonucleoside monophosphate metabolic process|GO:1901362,organic cyclic compound biosynthetic process|GO:0042451,purine nucleoside biosynthetic process|GO:0009168,purine ribonucleoside monophosphate biosynthetic process|GO:0044710,singl…	GO:0044425,membrane part|GO:0016021,integral component of membrane|GO:0016020,membrane|GO:0031224,intrinsic component of membrane	GO:0035639,purine ribonucleoside triphosphate binding|GO:0036442,hydrogen-exporting ATPase activity|GO:0005488,binding|GO:0016887,ATPase activity|GO:0043167,ion binding|GO:1901363,heterocyclic compound binding|GO:0032550,purine ribonucleoside binding|GO:0001882,nucleoside binding|GO:0043168,anion binding|GO:0042625,ATPase activity, coupled to transmembrane movement of ions|GO:0042626,ATPase activ…	ath00190,Oxidative phosphorylation	http://www.uniprot.org/uniprot/Q9SJB3	FALSE
59	22.57	22.6	44	gi|743866256	PREDICTED: GDP-mannose 3,5-epimerase 2 [Populus euphratica]	19	Populus euphratica	2.8054	0.4081	2.6062	0.3875	2.6303	0.4413	2.5586	0.4178	2.65013	1.40606	91.25	0	Q93VR3	At5g28840	GO:0046364,monosaccharide biosynthetic process|GO:0019752,carboxylic acid metabolic process|GO:0042364,water-soluble vitamin biosynthetic process|GO:0044723,single-organism carbohydrate metabolic process|GO:0044281,small molecule metabolic process|GO:0044283,small molecule biosynthetic process|GO:0044699,single-organism process|GO:0019853,L-ascorbic acid biosynthetic process|GO:0019852,L-ascorbic…	GO:0005737,cytoplasm|GO:0005829,cytosol|GO:0044464,cell part|GO:0005623,cell|GO:0005622,intracellular|GO:0044444,cytoplasmic part|GO:0044424,intracellular part	GO:0016857,racemase and epimerase activity, acting on carbohydrates and derivatives|GO:0016854,racemase and epimerase activity|GO:0016853,isomerase activity|GO:0050662,coenzyme binding|GO:0051287,NAD binding|GO:0000166,nucleotide binding|GO:0036094,small molecule binding|GO:0003824,catalytic activity|GO:0048037,cofactor binding|GO:0047918,GDP-mannose 3,5-epimerase activity|GO:0097159,organic cycl…	ath01110,Biosynthesis of secondary metabolites|ath00053,Ascorbate and aldarate metabolism|ath00520,Amino sugar and nucleotide sugar metabolism|ath01100,Metabolic pathways	http://www.uniprot.org/uniprot/Q93VR3	FALSE
594	4.3	4.43	17.7	gi|743872620	PREDICTED: non-functional NADPH-dependent codeinone reductase 2-like [Populus euphratica]	4	Populus euphratica	2.8054	0.2096	3.02	0.1948	4.6989	0.084	5.0582	0.0799	3.89562	1.96185	60.46	4e-144	Q9SXC0	F23H11.27	GO:0009628,response to abiotic stimulus|GO:0044710,single-organism metabolic process|GO:0050896,response to stimulus|GO:0006950,response to stress|GO:0006970,response to osmotic stress|GO:0055114,oxidation-reduction process|GO:0008152,metabolic process|GO:0009651,response to salt stress|GO:0044699,single-organism process	GO:0005737,cytoplasm|GO:0005829,cytosol|GO:0044464,cell part|GO:0005623,cell|GO:0005622,intracellular|GO:0044444,cytoplasmic part|GO:0044424,intracellular part	GO:0003824,catalytic activity|GO:0016491,oxidoreductase activity		http://www.uniprot.org/uniprot/Q9SXC0	FALSE
1366	2	2	15.6	gi|743874047	PREDICTED: trafficking protein particle complex subunit 2-like, partial [Populus euphratica]	1	Populus euphratica	19.5884	0.3157	2.0701	0.9499	0.3565	0.6818	0.0515	0.2446	5.51663	2.46379	92.66	9e-73	F4HTY0	At1g80500	GO:0006888,ER to Golgi vesicle-mediated transport|GO:0016192,vesicle-mediated transport|GO:0046907,intracellular transport|GO:0048193,Golgi vesicle transport|GO:0006810,transport|GO:0044765,single-organism transport|GO:1902578,single-organism localization|GO:0051641,cellular localization|GO:0051649,establishment of localization in cell|GO:1902582,single-organism intracellular transport|GO:0051234…	GO:0005737,cytoplasm|GO:0044464,cell part|GO:0005623,cell|GO:0005622,intracellular|GO:0044424,intracellular part			http://www.uniprot.org/uniprot/F4HTY0	FALSE
515	5.36	5.47	20.8	gi|743879261	PREDICTED: ferritin-3, chloroplastic-like [Populus euphratica]	8	Populus euphratica	4.2073	0.1307	4.0551	0.1311	5.6494	0.065	5.3951	0.0651	4.82672	2.27104	73.08	6e-107	Q9SRL5	FER2	GO:0008152,metabolic process|GO:0050801,ion homeostasis|GO:0010039,response to iron ion|GO:0000302,response to reactive oxygen species|GO:0042592,homeostatic process|GO:0055072,iron ion homeostasis|GO:0006826,iron ion transport|GO:0055076,transition metal ion homeostasis|GO:0098771,inorganic ion homeostasis|GO:0015979,photosynthesis|GO:0044699,single-organism process|GO:0009719,response to endoge…	GO:0005737,cytoplasm|GO:0009536,plastid|GO:0043231,intracellular membrane-bounded organelle|GO:0044464,cell part|GO:0044444,cytoplasmic part|GO:0005623,cell|GO:0005622,intracellular|GO:0043229,intracellular organelle|GO:0044424,intracellular part|GO:0043227,membrane-bounded organelle|GO:0043226,organelle|GO:0009507,chloroplast	GO:0043169,cation binding|GO:0016722,oxidoreductase activity, oxidizing metal ions|GO:0016724,oxidoreductase activity, oxidizing metal ions, oxygen as acceptor|GO:0046914,transition metal ion binding|GO:0003824,catalytic activity|GO:0004322,ferroxidase activity|GO:0043167,ion binding|GO:0008199,ferric iron binding|GO:0005488,binding|GO:0005506,iron ion binding|GO:0046872,metal ion binding|GO:0016…		http://www.uniprot.org/uniprot/Q9SRL5	FALSE
218	10.86	10.9	40.1	gi|743886684	PREDICTED: enoyl-[acyl-carrier-protein] reductase [NADH], chloroplastic-like [Populus euphratica]	12	1.10379e+07	1.8535	0.3548	4.5709	0.1599	0.7379	0.5873	1.803	0.3676	2.24132	1.16435	78.29	0	Q9SLA8	MOD1	GO:0006633,fatty acid biosynthetic process|GO:0006631,fatty acid metabolic process|GO:0009628,response to abiotic stimulus|GO:0016131,brassinosteroid metabolic process|GO:0051234,establishment of localization|GO:0016132,brassinosteroid biosynthetic process|GO:0006732,coenzyme metabolic process|GO:0051186,cofactor metabolic process|GO:0019752,carboxylic acid metabolic process|GO:0044249,cellular b…	GO:0031975,envelope|GO:0043229,intracellular organelle|GO:0005622,intracellular|GO:0043227,membrane-bounded organelle|GO:0043226,organelle|GO:0009579,thylakoid|GO:0009941,chloroplast envelope|GO:0009536,plastid|GO:0009532,plastid stroma|GO:0009570,chloroplast stroma|GO:0044435,plastid part|GO:0044434,chloroplast part|GO:0043234,protein complex|GO:0031967,organelle envelope|GO:0009507,chloroplast|…	GO:0005488,binding|GO:0043169,cation binding|GO:0046872,metal ion binding|GO:0016628,oxidoreductase activity, acting on the CH-CH group of donors, NAD or NADP as acceptor|GO:0046914,transition metal ion binding|GO:0043167,ion binding|GO:0016627,oxidoreductase activity, acting on the CH-CH group of donors|GO:0016631,enoyl-[acyl-carrier-protein] reductase activity|GO:0004312,fatty acid synthase act…	ath00061,Fatty acid biosynthesis|ath00780,Biotin metabolism|ath01212,Fatty acid metabolism|ath01100,Metabolic pathways	http://www.uniprot.org/uniprot/Q9SLA8	FALSE
574	4.51	4.56	14.8	gi|743886988	PREDICTED: granule-bound starch synthase 1, chloroplastic/amyloplastic-like isoform X2 [Populus euphratica]	4	Populus euphratica	2.5586	0.2851	1.977	0.3638	2.5351	0.765	1.9055	0.9561	2.24405	1.1661	41.13	1e-108	Q9MAC8	SS2	GO:0050896,response to stimulus|GO:0044237,cellular metabolic process|GO:0046173,polyol biosynthetic process|GO:0019751,polyol metabolic process|GO:0044249,cellular biosynthetic process|GO:0009250,glucan biosynthetic process|GO:0044281,small molecule metabolic process|GO:0034645,cellular macromolecule biosynthetic process|GO:0044283,small molecule biosynthetic process|GO:0016051,carbohydrate bios…	GO:0005737,cytoplasm|GO:0009536,plastid|GO:0043231,intracellular membrane-bounded organelle|GO:0044464,cell part|GO:0044444,cytoplasmic part|GO:0005623,cell|GO:0005622,intracellular|GO:0043229,intracellular organelle|GO:0044424,intracellular part|GO:0009501,amyloplast|GO:0043227,membrane-bounded organelle|GO:0043226,organelle|GO:0009507,chloroplast	GO:0004373,glycogen (starch) synthase activity|GO:0035251,UDP-glucosyltransferase activity|GO:0046527,glucosyltransferase activity|GO:0003824,catalytic activity|GO:0016740,transferase activity|GO:0016757,transferase activity, transferring glycosyl groups|GO:0009011,starch synthase activity|GO:0016758,transferase activity, transferring hexosyl groups|GO:0008194,UDP-glycosyltransferase activity	ath00500,Starch and sucrose metabolism|ath01100,Metabolic pathways|ath01110,Biosynthesis of secondary metabolites	http://www.uniprot.org/uniprot/Q9MAC8	FALSE
205	11.11	15.58	47.3	gi|743889355	PREDICTED: probable fructose-bisphosphate aldolase 3, chloroplastic [Populus euphratica]	15	Populus euphratica	1.9588	0.1168	1.6444	0.0834	5.1051	0.038	4.2855	0.0294	3.24845	1.69975	84.91	0	Q9ZU52	FBA3	GO:0009167,purine ribonucleoside monophosphate metabolic process|GO:0044281,small molecule metabolic process|GO:0009161,ribonucleoside monophosphate metabolic process|GO:1901360,organic cyclic compound metabolic process|GO:0044712,single-organism catabolic process|GO:0044710,single-organism metabolic process|GO:0010035,response to inorganic substance|GO:0009199,ribonucleoside triphosphate metabol…	GO:0031976,plastid thylakoid|GO:0043229,intracellular organelle|GO:0043227,membrane-bounded organelle|GO:0043226,organelle|GO:0009579,thylakoid|GO:0009534,chloroplast thylakoid|GO:0031984,organelle subcompartment|GO:0009532,plastid stroma|GO:0009570,chloroplast stroma|GO:0005739,mitochondrion|GO:0044435,plastid part|GO:0044434,chloroplast part|GO:0005737,cytoplasm|GO:0010287,plastoglobule|GO:0009…	GO:0016829,lyase activity|GO:0016830,carbon-carbon lyase activity|GO:0016832,aldehyde-lyase activity|GO:0003824,catalytic activity|GO:0004332,fructose-bisphosphate aldolase activity	ath00030,Pentose phosphate pathway|ath00710,Carbon fixation in photosynthetic organisms|ath00010,Glycolysis / Gluconeogenesis|ath00051,Fructose and mannose metabolism|ath01230,Biosynthesis of amino acids|ath01200,Carbon metabolism|ath01110,Biosynthesis of secondary metabolites|ath01100,Metabolic pathways	http://www.uniprot.org/uniprot/Q9ZU52	FALSE
1122	2.01	2.02	2.7	gi|743893243	PREDICTED: subtilisin-like protease SBT5.4 [Populus euphratica]	1	Populus euphratica	1.7378	0.5252	2.6303	0.3068	1.7701	0.7452	2.704	0.3924	2.21055	1.14441	54.93	0	F4JXC5	SBT5.4	GO:0044238,primary metabolic process|GO:0030154,cell differentiation|GO:0048468,cell development|GO:0007275,multicellular organismal development|GO:0044699,single-organism process|GO:0048863,stem cell differentiation|GO:0048864,stem cell development|GO:0040007,growth|GO:0048869,cellular developmental process|GO:0040008,regulation of growth|GO:0050789,regulation of biological process|GO:0071704,or…	GO:0005737,cytoplasm|GO:0005783,endoplasmic reticulum|GO:0005618,cell wall|GO:0016020,membrane|GO:0044464,cell part|GO:0044444,cytoplasmic part|GO:0005623,cell|GO:0030312,external encapsulating structure|GO:0043229,intracellular organelle|GO:0071944,cell periphery|GO:0012505,endomembrane system|GO:0005886,plasma membrane|GO:0044424,intracellular part|GO:0005622,intracellular|GO:0043227,membrane-b…	GO:0004252,serine-type endopeptidase activity|GO:0004175,endopeptidase activity|GO:0017171,serine hydrolase activity|GO:0016787,hydrolase activity|GO:0003824,catalytic activity|GO:0070011,peptidase activity, acting on L-amino acid peptides|GO:0008233,peptidase activity|GO:0008236,serine-type peptidase activity		http://www.uniprot.org/uniprot/F4JXC5	FALSE
44	26.52	26.59	55.3	gi|743896837	PREDICTED: enolase [Populus euphratica]	34	Populus euphratica	1.4859	0.1862	1.4859	0.4469	2.5823	0.2145	2.6546	0.3805	2.05218	1.03715	88.54	0	P25696	ENO2	GO:0080090,regulation of primary metabolic process|GO:0019222,regulation of metabolic process|GO:0019682,glyceraldehyde-3-phosphate metabolic process|GO:0009167,purine ribonucleoside monophosphate metabolic process|GO:0044281,small molecule metabolic process|GO:0009161,ribonucleoside monophosphate metabolic process|GO:1901362,organic cyclic compound biosynthetic process|GO:1901360,organic cyclic …	GO:0031975,envelope|GO:0048046,apoplast|GO:0043229,intracellular organelle|GO:0071944,cell periphery|GO:0043227,membrane-bounded organelle|GO:0043226,organelle|GO:0030054,cell junction|GO:0005737,cytoplasm|GO:0009536,plastid|GO:0005634,nucleus|GO:0016020,membrane|GO:0044444,cytoplasmic part|GO:0005739,mitochondrion|GO:0005576,extracellular region|GO:0043234,protein complex|GO:1902494,catalytic co…	GO:0043169,cation binding|GO:0046872,metal ion binding|GO:0046914,transition metal ion binding|GO:0043167,ion binding|GO:0016835,carbon-oxygen lyase activity|GO:0016836,hydro-lyase activity|GO:0000287,magnesium ion binding|GO:1901363,heterocyclic compound binding|GO:0004634,phosphopyruvate hydratase activity|GO:0003824,catalytic activity|GO:0005488,binding|GO:0003676,nucleic acid binding|GO:00036…	ath03018,RNA degradation|ath00010,Glycolysis / Gluconeogenesis|ath01230,Biosynthesis of amino acids|ath01200,Carbon metabolism|ath01110,Biosynthesis of secondary metabolites|ath01100,Metabolic pathways	http://www.uniprot.org/uniprot/P25696	FALSE
450	6.04	6.04	14.4	gi|743899195	PREDICTED: peroxidase 12-like [Populus euphratica]	6	Populus euphratica	4.5709	0.399	3.9811	0.4435	4.529	0.4731	3.9811	0.5327	4.26553	2.09272	63.87	2e-158	Q96520	PER12	GO:0048638,regulation of developmental growth|GO:0048466,androecium development|GO:0008152,metabolic process|GO:0048589,developmental growth|GO:0048443,stamen development|GO:0048569,post-embryonic organ development|GO:0009791,post-embryonic development|GO:0042744,hydrogen peroxide catabolic process|GO:0035266,meristem growth|GO:0050789,regulation of biological process|GO:0044699,single-organism p…	GO:0043229,intracellular organelle|GO:0071944,cell periphery|GO:0043227,membrane-bounded organelle|GO:0043226,organelle|GO:0030054,cell junction|GO:0005737,cytoplasm|GO:0005773,vacuole|GO:0016020,membrane|GO:0030312,external encapsulating structure|GO:0055044,symplast|GO:0005911,cell-cell junction|GO:0009505,plant-type cell wall|GO:0009506,plasmodesma|GO:0043231,intracellular membrane-bounded org…	GO:0043169,cation binding|GO:0046872,metal ion binding|GO:0020037,heme binding|GO:0046906,tetrapyrrole binding|GO:0097159,organic cyclic compound binding|GO:0016209,antioxidant activity|GO:0043167,ion binding|GO:1901363,heterocyclic compound binding|GO:0003824,catalytic activity|GO:0005488,binding|GO:0016684,oxidoreductase activity, acting on peroxide as acceptor|GO:0004601,peroxidase activity|GO…	ath00940,Phenylpropanoid biosynthesis|ath01100,Metabolic pathways|ath01110,Biosynthesis of secondary metabolites	http://www.uniprot.org/uniprot/Q96520	FALSE
1473	1.74	2	9.6	gi|743899657	PREDICTED: nitronate monooxygenase [Populus euphratica]	1	Populus euphratica	18.197	0.3382	18.3654	0.3079	2.1086	0.4394	2.6303	0.3922	10.3253	3.36812	44	1e-06	Q24JJ8	GLO3	GO:0006950,response to stress|GO:0048584,positive regulation of response to stimulus|GO:0048583,regulation of response to stimulus|GO:0031349,positive regulation of defense response|GO:0044249,cellular biosynthetic process|GO:0023052,signaling|GO:0007165,signal transduction|GO:0050789,regulation of biological process|GO:0031347,regulation of defense response|GO:0044710,single-organism metabolic p…	GO:0005737,cytoplasm|GO:0043231,intracellular membrane-bounded organelle|GO:0044464,cell part|GO:0005777,peroxisome|GO:0044444,cytoplasmic part|GO:0005623,cell|GO:0005622,intracellular|GO:0042579,microbody|GO:0043229,intracellular organelle|GO:0044424,intracellular part|GO:0043227,membrane-bounded organelle|GO:0043226,organelle	GO:0003973,(S)-2-hydroxy-acid oxidase activity|GO:0005488,binding|GO:0000166,nucleotide binding|GO:1901363,heterocyclic compound binding|GO:1901265,nucleoside phosphate binding|GO:0016491,oxidoreductase activity|GO:0043168,anion binding|GO:0050662,coenzyme binding|GO:0052854,medium-chain-(S)-2-hydroxy-acid oxidase activity|GO:0052852,very-long-chain-(S)-2-hydroxy-acid oxidase activity|GO:0052853,…	ath00630,Glyoxylate and dicarboxylate metabolism|ath04146,Peroxisome|ath01110,Biosynthesis of secondary metabolites|ath01100,Metabolic pathways|ath01200,Carbon metabolism	http://www.uniprot.org/uniprot/Q24JJ8	FALSE
54	23.6	35.18	44.7	gi|743900113	PREDICTED: ATP synthase subunit alpha, mitochondrial [Populus euphratica]	68	Populus euphratica	2.0512	0.0144	2.208	0.0289	2.9107	0.0343	3.281	0.0687	2.61273	1.38556	89.35	0	P92549	ATPA	GO:0009167,purine ribonucleoside monophosphate metabolic process|GO:0009165,nucleotide biosynthetic process|GO:0009163,nucleoside biosynthetic process|GO:0009161,ribonucleoside monophosphate metabolic process|GO:1901362,organic cyclic compound biosynthetic process|GO:0042451,purine nucleoside biosynthetic process|GO:0009168,purine ribonucleoside monophosphate biosynthetic process|GO:0044710,singl…	GO:0044464,cell part|GO:0031975,envelope|GO:0043229,intracellular organelle|GO:0043227,membrane-bounded organelle|GO:0043226,organelle|GO:0045261,proton-transporting ATP synthase complex, catalytic core F(1)|GO:0044446,intracellular organelle part|GO:0031090,organelle membrane|GO:0005743,mitochondrial inner membrane|GO:0016020,membrane|GO:0044444,cytoplasmic part|GO:0005739,mitochondrion|GO:00057…	GO:0035639,purine ribonucleoside triphosphate binding|GO:0036442,hydrogen-exporting ATPase activity|GO:0005488,binding|GO:0016887,ATPase activity|GO:0043167,ion binding|GO:1901363,heterocyclic compound binding|GO:0032550,purine ribonucleoside binding|GO:0001882,nucleoside binding|GO:0043168,anion binding|GO:0042625,ATPase activity, coupled to transmembrane movement of ions|GO:0042626,ATPase activ…	ath00190,Oxidative phosphorylation|ath01100,Metabolic pathways	http://www.uniprot.org/uniprot/P92549	FALSE
1413	2	2	9.3	gi|743902104	PREDICTED: protein transport protein Sec61 subunit beta [Populus euphratica]	1	Populus euphratica	2.9648	0.5149	1.8365	0.7239	4.0179	0.5171	2.6546	0.7273	2.86845	1.52027	69.32	8e-31	Q9FKK1	At5g60460	GO:0033036,macromolecule localization|GO:0034613,cellular protein localization|GO:0046907,intracellular transport|GO:0070727,cellular macromolecule localization|GO:0006886,intracellular protein transport|GO:0006810,transport|GO:0045184,establishment of protein localization|GO:0008104,protein localization|GO:0071702,organic substance transport|GO:0015031,protein transport|GO:0051234,establishment …	GO:0005784,Sec61 translocon complex|GO:0005783,endoplasmic reticulum|GO:0044464,cell part|GO:0005789,endoplasmic reticulum membrane|GO:0042175,nuclear outer membrane-endoplasmic reticulum membrane network|GO:0043229,intracellular organelle|GO:0071944,cell periphery|GO:0043227,membrane-bounded organelle|GO:0043226,organelle|GO:0005737,cytoplasm|GO:0031090,organelle membrane|GO:0016020,membrane|GO:…		ath03060,Protein export|ath04145,Phagosome|ath04141,Protein processing in endoplasmic reticulum	http://www.uniprot.org/uniprot/Q9FKK1	FALSE
38	28.47	28.5	39.9	gi|743905573	PREDICTED: cell division cycle protein 48 homolog isoform X2 [Populus euphratica]	22	Populus euphratica	1.5704	0.2326	1.6293	0.1671	2.9376	0.2181	2.9648	0.217	2.27553	1.1862	94.08	0	Q9LZF6	CDC48E	GO:0033036,macromolecule localization|GO:0007049,cell cycle|GO:0006810,transport|GO:0009987,cellular process|GO:0045184,establishment of protein localization|GO:0008104,protein localization|GO:0044763,single-organism cellular process|GO:0051301,cell division|GO:0008152,metabolic process|GO:0071702,organic substance transport|GO:0015031,protein transport|GO:0051234,establishment of localization|GO…	GO:0043229,intracellular organelle|GO:0071944,cell periphery|GO:0043227,membrane-bounded organelle|GO:0043226,organelle|GO:0005856,cytoskeleton|GO:0005618,cell wall|GO:0005634,nucleus|GO:0005737,cytoplasm|GO:0005794,Golgi apparatus|GO:0030312,external encapsulating structure|GO:0012505,endomembrane system|GO:0009524,phragmoplast|GO:0043231,intracellular membrane-bounded organelle|GO:0043232,intra…	GO:0035639,purine ribonucleoside triphosphate binding|GO:0005488,binding|GO:0043167,ion binding|GO:1901363,heterocyclic compound binding|GO:1901265,nucleoside phosphate binding|GO:0001882,nucleoside binding|GO:0043168,anion binding|GO:0000166,nucleotide binding|GO:0001883,purine nucleoside binding|GO:0032549,ribonucleoside binding|GO:0017076,purine nucleotide binding|GO:0005524,ATP binding|GO:001…	ath04141,Protein processing in endoplasmic reticulum	http://www.uniprot.org/uniprot/Q9LZF6	FALSE
1189	2	10.03	15.1	gi|743906187	PREDICTED: D-3-phosphoglycerate dehydrogenase 2, chloroplastic-like [Populus euphratica]	6	Populus euphratica	2.0512	0.3813	2.5351	0.3557	2.6792	0.3778	3.3729	0.3526	2.6596	1.41121	80.59	0	O04130	PGDH2	GO:0019752,carboxylic acid metabolic process|GO:0044249,cellular biosynthetic process|GO:0006807,nitrogen compound metabolic process|GO:0044281,small molecule metabolic process|GO:0044283,small molecule biosynthetic process|GO:0009069,serine family amino acid metabolic process|GO:0044699,single-organism process|GO:1901576,organic substance biosynthetic process|GO:0044710,single-organism metabolic…	GO:0005737,cytoplasm|GO:0009536,plastid|GO:0043231,intracellular membrane-bounded organelle|GO:0044464,cell part|GO:0044444,cytoplasmic part|GO:0005623,cell|GO:0005622,intracellular|GO:0043229,intracellular organelle|GO:0044424,intracellular part|GO:0043227,membrane-bounded organelle|GO:0043226,organelle|GO:0009507,chloroplast	GO:0043168,anion binding|GO:0050662,coenzyme binding|GO:0016614,oxidoreductase activity, acting on CH-OH group of donors|GO:0016616,oxidoreductase activity, acting on the CH-OH group of donors, NAD or NADP as acceptor|GO:0043177,organic acid binding|GO:0051287,NAD binding|GO:0031406,carboxylic acid binding|GO:0000166,nucleotide binding|GO:0036094,small molecule binding|GO:0003824,catalytic activi…	ath00260,Glycine, serine and threonine metabolism|ath01100,Metabolic pathways|ath01200,Carbon metabolism|ath01230,Biosynthesis of amino acids	http://www.uniprot.org/uniprot/O04130	FALSE
881	2.53	2.88	21.6	gi|743906614	PREDICTED: aspartic proteinase A1-like [Populus euphratica]	7	Populus euphratica	2.2909	0.3811	1.977	0.4479	2.4889	0.2806	2.2909	0.3181	2.26193	1.17755	75.76	0	O65390	APA1	GO:0008104,protein localization|GO:0009167,purine ribonucleoside monophosphate metabolic process|GO:0044281,small molecule metabolic process|GO:0009161,ribonucleoside monophosphate metabolic process|GO:0071840,cellular component organization or biogenesis|GO:0044712,single-organism catabolic process|GO:0044710,single-organism metabolic process|GO:0010035,response to inorganic substance|GO:0070727…	GO:0005737,cytoplasm|GO:0043231,intracellular membrane-bounded organelle|GO:0005773,vacuole|GO:0005829,cytosol|GO:0044464,cell part|GO:0044444,cytoplasmic part|GO:0005623,cell|GO:0005622,intracellular|GO:0055044,symplast|GO:0043229,intracellular organelle|GO:0030054,cell junction|GO:0005911,cell-cell junction|GO:0044424,intracellular part|GO:0043227,membrane-bounded organelle|GO:0043226,organelle…	GO:0016787,hydrolase activity|GO:0004175,endopeptidase activity|GO:0070001,aspartic-type peptidase activity|GO:0003824,catalytic activity|GO:0070011,peptidase activity, acting on L-amino acid peptides|GO:0004190,aspartic-type endopeptidase activity|GO:0008233,peptidase activity		http://www.uniprot.org/uniprot/O65390	FALSE
1311	2	2	5.5	gi|743908772	PREDICTED: serine carboxypeptidase-like 31 [Populus euphratica]	1	Populus euphratica	1.8535	0.6074	1.4454	0.7518	4.1305	0.4551	3.1046	0.55	2.6335	1.39698	69.55	0	O04084	SCPL31	GO:0044238,primary metabolic process|GO:0019538,protein metabolic process|GO:0043170,macromolecule metabolic process|GO:0071704,organic substance metabolic process|GO:0008152,metabolic process|GO:0006508,proteolysis	GO:0005576,extracellular region	GO:0016787,hydrolase activity|GO:0017171,serine hydrolase activity|GO:0003824,catalytic activity|GO:0004180,carboxypeptidase activity|GO:0004185,serine-type carboxypeptidase activity|GO:0008238,exopeptidase activity|GO:0070011,peptidase activity, acting on L-amino acid peptides|GO:0070008,serine-type exopeptidase activity|GO:0008233,peptidase activity|GO:0008236,serine-type peptidase activity		http://www.uniprot.org/uniprot/O04084	FALSE
202	11.23	13.45	29	gi|743909812	PREDICTED: aspartate aminotransferase, cytoplasmic-like [Populus euphratica]	12	Populus euphratica	2.466	0.3183	2.8576	0.3211	2.2699	0.2767	2.421	0.2788	2.50362	1.32402	85.61	0	P46645	ASP2	GO:0009693,ethylene biosynthetic process|GO:0019752,carboxylic acid metabolic process|GO:0044249,cellular biosynthetic process|GO:0043449,cellular alkene metabolic process|GO:0006807,nitrogen compound metabolic process|GO:0044281,small molecule metabolic process|GO:0009692,ethylene metabolic process|GO:0009064,glutamine family amino acid metabolic process|GO:0044699,single-organism process|GO:190…	GO:0043229,intracellular organelle|GO:0071944,cell periphery|GO:0043227,membrane-bounded organelle|GO:0043226,organelle|GO:0030054,cell junction|GO:0005737,cytoplasm|GO:0031090,organelle membrane|GO:0005773,vacuole|GO:0098805,whole membrane|GO:0016020,membrane|GO:0005774,vacuolar membrane|GO:0044437,vacuolar part|GO:0005794,Golgi apparatus|GO:0098588,bounding membrane of organelle|GO:0030312,exte…	GO:0043168,anion binding|GO:0043169,cation binding|GO:0046872,metal ion binding|GO:0046914,transition metal ion binding|GO:0008483,transaminase activity|GO:0097159,organic cyclic compound binding|GO:0003824,catalytic activity|GO:0043167,ion binding|GO:0070546,L-phenylalanine aminotransferase activity|GO:1901363,heterocyclic compound binding|GO:0004069,L-aspartate:2-oxoglutarate aminotransferase a…	ath01230,Biosynthesis of amino acids|ath00400,Phenylalanine, tyrosine and tryptophan biosynthesis|ath00220,Arginine biosynthesis|ath00270,Cysteine and methionine metabolism|ath01210,2-Oxocarboxylic acid metabolism|ath00350,Tyrosine metabolism|ath00950,Isoquinoline alkaloid biosynthesis|ath00360,Phenylalanine metabolism|ath01100,Metabolic pathways|ath00710,Carbon fixation in photosynthetic organis…	http://www.uniprot.org/uniprot/P46645	FALSE
328	8.06	17.84	21.6	gi|743910280	PREDICTED: ATPase 10, plasma membrane-type-like [Populus euphratica]	11	Populus euphratica	3.6983	0.4519	3.8371	0.5259	2.0893	0.1296	2.884	0.1717	3.12718	1.64486	79.62	0	Q43128	AHA10	GO:0009167,purine ribonucleoside monophosphate metabolic process|GO:0009165,nucleotide biosynthetic process|GO:0009163,nucleoside biosynthetic process|GO:0009161,ribonucleoside monophosphate metabolic process|GO:0098771,inorganic ion homeostasis|GO:0009698,phenylpropanoid metabolic process|GO:0009699,phenylpropanoid biosynthetic process|GO:0009168,purine ribonucleoside monophosphate biosynthetic …	GO:0000325,plant-type vacuole|GO:0043229,intracellular organelle|GO:0005622,intracellular|GO:0043227,membrane-bounded organelle|GO:0043226,organelle|GO:0031224,intrinsic component of membrane|GO:0005737,cytoplasm|GO:0009536,plastid|GO:0031090,organelle membrane|GO:0005773,vacuole|GO:0016021,integral component of membrane|GO:0016020,membrane|GO:0005774,vacuolar membrane|GO:0044437,vacuolar part|GO…	GO:0035639,purine ribonucleoside triphosphate binding|GO:0036442,hydrogen-exporting ATPase activity|GO:0005488,binding|GO:0016887,ATPase activity|GO:0043167,ion binding|GO:1901363,heterocyclic compound binding|GO:0032550,purine ribonucleoside binding|GO:0001882,nucleoside binding|GO:0043168,anion binding|GO:0042625,ATPase activity, coupled to transmembrane movement of ions|GO:0042626,ATPase activ…	ath00190,Oxidative phosphorylation	http://www.uniprot.org/uniprot/Q43128	FALSE
1550	1.35	1.66	10.7	gi|743910288	PREDICTED: membrane steroid-binding protein 2 [Populus euphratica]	2	Populus euphratica	2.5823	0.2957	2.8576	0.2895	3.3729	0.1874	3.5645	0.1848	3.09432	1.62962	65.87	1e-87	Q9M2Z4	MSBP2	GO:0009607,response to biotic stimulus|GO:0006950,response to stress|GO:0042430,indole-containing compound metabolic process|GO:0019752,carboxylic acid metabolic process|GO:0042435,indole-containing compound biosynthetic process|GO:0034641,cellular nitrogen compound metabolic process|GO:0006807,nitrogen compound metabolic process|GO:0044281,small molecule metabolic process|GO:0044283,small molecu…	GO:0005783,endoplasmic reticulum|GO:0055035,plastid thylakoid membrane|GO:0034357,photosynthetic membrane|GO:0031976,plastid thylakoid|GO:0043229,intracellular organelle|GO:0071944,cell periphery|GO:0005622,intracellular|GO:0043227,membrane-bounded organelle|GO:0043226,organelle|GO:0031224,intrinsic component of membrane|GO:0009535,chloroplast thylakoid membrane|GO:0009534,chloroplast thylakoid|G…	GO:0020037,heme binding|GO:0046906,tetrapyrrole binding|GO:0097159,organic cyclic compound binding|GO:0008289,lipid binding|GO:0005488,binding|GO:0005496,steroid binding|GO:1901363,heterocyclic compound binding		http://www.uniprot.org/uniprot/Q9M2Z4	FALSE
1284	2	2	3.6	gi|743910823	PREDICTED: branched-chain-amino-acid aminotransferase-like protein 1 [Populus euphratica]	1	Populus euphratica	5.445	0.9914	11.1686	0.3136	0.3133	0.2822	0.955	0.8402	4.47047	2.16043	80.66	0	Q9ASR4	At5g27410	GO:0008152,metabolic process		GO:0003824,catalytic activity		http://www.uniprot.org/uniprot/Q9ASR4	FALSE
866	2.63	2.68	5.6	gi|743910930	PREDICTED: pyruvate dehydrogenase (acetyl-transferring) kinase, mitochondrial [Populus euphratica]	2	Populus euphratica	1.977	0.2655	1.0666	0.8104	4.9659	0.0873	2.6062	0.1188	2.65393	1.40813	33.78	0.039	P49333	ETR1	GO:0009723,response to ethylene|GO:0009593,detection of chemical stimulus|GO:0048585,negative regulation of response to stimulus|GO:0048583,regulation of response to stimulus|GO:0048580,regulation of post-embryonic development|GO:0072359,circulatory system development|GO:0072358,cardiovascular system development|GO:0009690,cytokinin metabolic process|GO:0007165,signal transduction|GO:0023014,sign…	GO:0005783,endoplasmic reticulum|GO:0005789,endoplasmic reticulum membrane|GO:0042175,nuclear outer membrane-endoplasmic reticulum membrane network|GO:0043229,intracellular organelle|GO:0043227,membrane-bounded organelle|GO:0043226,organelle|GO:0031224,intrinsic component of membrane|GO:0005737,cytoplasm|GO:0031090,organelle membrane|GO:0016021,integral component of membrane|GO:0016020,membrane|G…	GO:0038023,signaling receptor activity|GO:0035639,purine ribonucleoside triphosphate binding|GO:0060089,molecular transducer activity|GO:0004872,receptor activity|GO:0004871,signal transducer activity|GO:0043167,ion binding|GO:1901363,heterocyclic compound binding|GO:0001883,purine nucleoside binding|GO:0001882,nucleoside binding|GO:0043168,anion binding|GO:0043169,cation binding|GO:0005057,recep…	ath04075,Plant hormone signal transduction	http://www.uniprot.org/uniprot/P49333	FALSE
541	4.9	4.98	23.9	gi|743911577	PREDICTED: uncharacterized aarF domain-containing protein kinase At5g05200, chloroplastic [Populus euphratica]	9	Populus euphratica	2.1878	0.4883	2.3768	0.4642	3.1046	0.4529	3.2509	0.4307	2.73002	1.44891	78.43	0	Q9ASX5	At5g05200	GO:0009893,positive regulation of metabolic process|GO:0019222,regulation of metabolic process|GO:0015994,chlorophyll metabolic process|GO:0006787,porphyrin-containing compound catabolic process|GO:0009311,oligosaccharide metabolic process|GO:1901575,organic substance catabolic process|GO:0006778,porphyrin-containing compound metabolic process|GO:1901564,organonitrogen compound metabolic process|…	GO:0005737,cytoplasm|GO:0009536,plastid|GO:0043231,intracellular membrane-bounded organelle|GO:0009532,plastid stroma|GO:0009570,chloroplast stroma|GO:0010287,plastoglobule|GO:0044464,cell part|GO:0044444,cytoplasmic part|GO:0005623,cell|GO:0005622,intracellular|GO:0044446,intracellular organelle part|GO:0043229,intracellular organelle|GO:0044435,plastid part|GO:0044434,chloroplast part|GO:004442…	GO:0035639,purine ribonucleoside triphosphate binding|GO:0005488,binding|GO:0043167,ion binding|GO:1901363,heterocyclic compound binding|GO:1901265,nucleoside phosphate binding|GO:0001882,nucleoside binding|GO:0043168,anion binding|GO:0000166,nucleotide binding|GO:0016740,transferase activity|GO:0001883,purine nucleoside binding|GO:0032549,ribonucleoside binding|GO:0017076,purine nucleotide bindi…		http://www.uniprot.org/uniprot/Q9ASX5	FALSE
402	6.6	6.68	40.9	gi|743912326	PREDICTED: probable aldo-keto reductase 2 [Populus euphratica]	6	Populus euphratica	1.6904	0.1051	1.2589	0.244	3.1333	0.0063	2.3768	0.0179	2.11485	1.08056	79.3	0	Q93ZN2	At1g60710	GO:0080090,regulation of primary metabolic process|GO:0019222,regulation of metabolic process|GO:0009167,purine ribonucleoside monophosphate metabolic process|GO:0044281,small molecule metabolic process|GO:0009161,ribonucleoside monophosphate metabolic process|GO:0009698,phenylpropanoid metabolic process|GO:0009699,phenylpropanoid biosynthetic process|GO:1901360,organic cyclic compound metabolic …	GO:0005737,cytoplasm|GO:0005829,cytosol|GO:0044464,cell part|GO:0005623,cell|GO:0005622,intracellular|GO:0044444,cytoplasmic part|GO:0044424,intracellular part	GO:0003824,catalytic activity|GO:0016491,oxidoreductase activity		http://www.uniprot.org/uniprot/Q93ZN2	FALSE
658	4.02	4.02	24.1	gi|743913001	PREDICTED: putative 4-hydroxy-4-methyl-2-oxoglutarate aldolase 3 [Populus euphratica]	4	Populus euphratica	0.912	0.6493	2.0701	0.5039	2.4889	0.584	5.5976	0.4586	2.76715	1.4684	78.92	9e-92	Q9FH13	At5g56260	GO:0009892,negative regulation of metabolic process|GO:0080090,regulation of primary metabolic process|GO:0019222,regulation of metabolic process|GO:0031323,regulation of cellular metabolic process|GO:0090304,nucleic acid metabolic process|GO:0034641,cellular nitrogen compound metabolic process|GO:0006807,nitrogen compound metabolic process|GO:0050789,regulation of biological process|GO:1901360,o…		GO:0043169,cation binding|GO:0046872,metal ion binding|GO:0008428,ribonuclease inhibitor activity|GO:0043167,ion binding|GO:0030234,enzyme regulator activity|GO:0008948,oxaloacetate decarboxylase activity|GO:0016830,carbon-carbon lyase activity|GO:0016831,carboxy-lyase activity|GO:0016833,oxo-acid-lyase activity|GO:0003824,catalytic activity|GO:0005488,binding|GO:0047443,4-hydroxy-4-methyl-2-oxog…		http://www.uniprot.org/uniprot/Q9FH13	FALSE
240	10.12	10.21	27.9	gi|743916626	PREDICTED: citrate synthase, mitochondrial isoform X4 [Populus euphratica]	11	Populus euphratica	4.2462	0.2174	4.4875	0.028	2.7542	0.2292	2.9376	0.0341	3.60637	1.85055	85.65	0	P20115	CSY4	GO:0009185,ribonucleoside diphosphate metabolic process|GO:0010035,response to inorganic substance|GO:0010038,response to metal ion|GO:0006732,coenzyme metabolic process|GO:0009141,nucleoside triphosphate metabolic process|GO:0009144,purine nucleoside triphosphate metabolic process|GO:0019752,carboxylic acid metabolic process|GO:0043436,oxoacid metabolic process|GO:0006099,tricarboxylic acid cycl…	GO:0031974,membrane-enclosed lumen|GO:0043229,intracellular organelle|GO:0071944,cell periphery|GO:0043227,membrane-bounded organelle|GO:0043226,organelle|GO:0005737,cytoplasm|GO:0009536,plastid|GO:0005618,cell wall|GO:0005739,mitochondrion|GO:0005759,mitochondrial matrix|GO:0005794,Golgi apparatus|GO:0030312,external encapsulating structure|GO:0012505,endomembrane system|GO:0009507,chloroplast|G…	GO:0035639,purine ribonucleoside triphosphate binding|GO:0036440,citrate synthase activity|GO:0008270,zinc ion binding|GO:0043167,ion binding|GO:1901363,heterocyclic compound binding|GO:1901265,nucleoside phosphate binding|GO:0001882,nucleoside binding|GO:0046912,transferase activity, transferring acyl groups, acyl groups converted into alkyl on transfer|GO:0043169,cation binding|GO:0046914,trans…	ath00630,Glyoxylate and dicarboxylate metabolism|ath00020,Citrate cycle (TCA cycle)|ath01210,2-Oxocarboxylic acid metabolism|ath01230,Biosynthesis of amino acids|ath01200,Carbon metabolism|ath01110,Biosynthesis of secondary metabolites|ath01100,Metabolic pathways	http://www.uniprot.org/uniprot/P20115	FALSE
72	19.74	19.76	34.1	gi|743917580	PREDICTED: probable fructokinase-6, chloroplastic [Populus euphratica]	13	Populus euphratica	3.0479	0.216	3.6308	0.0484	2.208	0.3954	2.4434	0.0931	2.83252	1.50209	77.84	0	Q9C524	At1g66430	GO:0019321,pentose metabolic process|GO:0016310,phosphorylation|GO:0019752,carboxylic acid metabolic process|GO:0043436,oxoacid metabolic process|GO:0006807,nitrogen compound metabolic process|GO:0009250,glucan biosynthetic process|GO:0044281,small molecule metabolic process|GO:0034645,cellular macromolecule biosynthetic process|GO:0044283,small molecule biosynthetic process|GO:0009069,serine fam…	GO:0005737,cytoplasm|GO:0009536,plastid|GO:0043231,intracellular membrane-bounded organelle|GO:0009532,plastid stroma|GO:0009570,chloroplast stroma|GO:0044464,cell part|GO:0044444,cytoplasmic part|GO:0005623,cell|GO:0005622,intracellular|GO:0044446,intracellular organelle part|GO:0043229,intracellular organelle|GO:0044435,plastid part|GO:0044434,chloroplast part|GO:0044424,intracellular part|GO:0…	GO:0019200,carbohydrate kinase activity|GO:0035639,purine ribonucleoside triphosphate binding|GO:0008865,fructokinase activity|GO:0004396,hexokinase activity|GO:0005488,binding|GO:0043167,ion binding|GO:1901363,heterocyclic compound binding|GO:0001883,purine nucleoside binding|GO:0001882,nucleoside binding|GO:0043168,anion binding|GO:0000166,nucleotide binding|GO:0016740,transferase activity|GO:1…	ath00051,Fructose and mannose metabolism|ath00500,Starch and sucrose metabolism|ath00520,Amino sugar and nucleotide sugar metabolism|ath01100,Metabolic pathways	http://www.uniprot.org/uniprot/Q9C524	FALSE
191	11.47	16.93	54.8	gi|743919520	PREDICTED: cysteine synthase [Populus euphratica]	17	Populus euphratica	1.9231	0.4265	1.6293	0.4692	3.6644	0.3081	3.0761	0.3318	2.57322	1.36358	84.86	0	P47998	OASA1	GO:0048589,developmental growth|GO:0048588,developmental cell growth|GO:0048468,cell development|GO:0009167,purine ribonucleoside monophosphate metabolic process|GO:0044281,small molecule metabolic process|GO:0044283,small molecule biosynthetic process|GO:0009698,phenylpropanoid metabolic process|GO:0009699,phenylpropanoid biosynthetic process|GO:0071840,cellular component organization or biogene…	GO:0048046,apoplast|GO:0042579,microbody|GO:0043229,intracellular organelle|GO:0071944,cell periphery|GO:0043227,membrane-bounded organelle|GO:0043226,organelle|GO:0005737,cytoplasm|GO:0009536,plastid|GO:0031090,organelle membrane|GO:0009532,plastid stroma|GO:0005773,vacuole|GO:0009570,chloroplast stroma|GO:0005634,nucleus|GO:0016020,membrane|GO:0005777,peroxisome|GO:0005774,vacuolar membrane|GO:…	GO:0043168,anion binding|GO:0016835,carbon-oxygen lyase activity|GO:0016829,lyase activity|GO:0004124,cysteine synthase activity|GO:0043167,ion binding|GO:0003824,catalytic activity|GO:0016740,transferase activity|GO:0048037,cofactor binding|GO:0030170,pyridoxal phosphate binding|GO:0005515,protein binding|GO:0097159,organic cyclic compound binding|GO:1901363,heterocyclic compound binding|GO:0005…	ath00270,Cysteine and methionine metabolism|ath01230,Biosynthesis of amino acids|ath01200,Carbon metabolism|ath00920,Sulfur metabolism|ath01110,Biosynthesis of secondary metabolites|ath01100,Metabolic pathways	http://www.uniprot.org/uniprot/P47998	FALSE
653	4.02	6.61	24.5	gi|743921982	PREDICTED: mitochondrial outer membrane protein porin of 34 kDa-like [Populus euphratica]	8	Populus euphratica	2.0701	0.5272	2.3768	0.4922	2.1281	0.5247	2.4434	0.4899	2.2546	1.17287	73.19	6e-147	Q9SRH5	VDAC1	GO:0022607,cellular component assembly|GO:0051707,response to other organism|GO:0051234,establishment of localization|GO:0070271,protein complex biogenesis|GO:0043933,macromolecular complex subunit organization|GO:0051049,regulation of transport|GO:0044248,cellular catabolic process|GO:0044249,cellular biosynthetic process|GO:0006820,anion transport|GO:0043248,proteasome assembly|GO:0034622,cellu…	GO:0005794,Golgi apparatus|GO:0031975,envelope|GO:0043229,intracellular organelle|GO:0071944,cell periphery|GO:0043227,membrane-bounded organelle|GO:0043226,organelle|GO:0031224,intrinsic component of membrane|GO:0005737,cytoplasm|GO:0009941,chloroplast envelope|GO:0009536,plastid|GO:0046930,pore complex|GO:0031090,organelle membrane|GO:0005773,vacuole|GO:0016021,integral component of membrane|GO…	GO:0022891,substrate-specific transmembrane transporter activity|GO:0005244,voltage-gated ion channel activity|GO:0005488,binding|GO:0022836,gated channel activity|GO:0005215,transporter activity|GO:0008509,anion transmembrane transporter activity|GO:0015288,porin activity|GO:0008308,voltage-gated anion channel activity|GO:0015075,ion transmembrane transporter activity|GO:0022832,voltage-gated ch…		http://www.uniprot.org/uniprot/Q9SRH5	FALSE
48	25.74	26.04	34.8	gi|743924688	PREDICTED: presequence protease 1, chloroplastic/mitochondrial [Populus euphratica]	27	Populus euphratica	2.355	0.1273	2.1878	0.1971	2.421	0.1115	2.2284	0.1688	2.29805	1.20041	80.7	0	Q9LJL3	PREP1	GO:0048440,carpel development|GO:0048467,gynoecium development|GO:0010038,response to metal ion|GO:0048569,post-embryonic organ development|GO:0009791,post-embryonic development|GO:0042744,hydrogen peroxide catabolic process|GO:0042743,hydrogen peroxide metabolic process|GO:0048481,ovule development|GO:0048827,phyllome development|GO:0007275,multicellular organismal development|GO:0044699,single-…	GO:0031974,membrane-enclosed lumen|GO:0031975,envelope|GO:0048046,apoplast|GO:0043229,intracellular organelle|GO:0043227,membrane-bounded organelle|GO:0043226,organelle|GO:0005737,cytoplasm|GO:0009941,chloroplast envelope|GO:0009536,plastid|GO:0009532,plastid stroma|GO:0009570,chloroplast stroma|GO:0005739,mitochondrion|GO:0044435,plastid part|GO:0044434,chloroplast part|GO:0005759,mitochondrial …	GO:0016787,hydrolase activity|GO:0004175,endopeptidase activity|GO:0004222,metalloendopeptidase activity|GO:0046914,transition metal ion binding|GO:0043169,cation binding|GO:0043167,ion binding|GO:0003824,catalytic activity|GO:0070011,peptidase activity, acting on L-amino acid peptides|GO:0008270,zinc ion binding|GO:0005515,protein binding|GO:0008233,peptidase activity|GO:0046872,metal ion bindin…		http://www.uniprot.org/uniprot/Q9LJL3	FALSE
224	10.55	10.66	13	gi|743924958	PREDICTED: pyruvate dehydrogenase E1 component subunit alpha, mitochondrial-like [Populus euphratica]	9	Populus euphratica	2.7797	0.231	2.9107	0.2203	3.281	0.2013	3.4356	0.1931	3.10175	1.63308	84.2	0	P52901	E1 ALPHA	GO:0009185,ribonucleoside diphosphate metabolic process|GO:0010035,response to inorganic substance|GO:0010038,response to metal ion|GO:0006732,coenzyme metabolic process|GO:0009141,nucleoside triphosphate metabolic process|GO:0009144,purine nucleoside triphosphate metabolic process|GO:0019752,carboxylic acid metabolic process|GO:0044723,single-organism carbohydrate metabolic process|GO:0034641,ce…	GO:0005737,cytoplasm|GO:0005829,cytosol|GO:0043231,intracellular membrane-bounded organelle|GO:0043233,organelle lumen|GO:0005634,nucleus|GO:0044464,cell part|GO:0044444,cytoplasmic part|GO:0031974,membrane-enclosed lumen|GO:0005622,intracellular|GO:0044446,intracellular organelle part|GO:0070013,intracellular organelle lumen|GO:0043229,intracellular organelle|GO:0005739,mitochondrion|GO:0044429,…	GO:0004738,pyruvate dehydrogenase activity|GO:0004739,pyruvate dehydrogenase (acetyl-transferring) activity|GO:0016624,oxidoreductase activity, acting on the aldehyde or oxo group of donors, disulfide as acceptor|GO:0003824,catalytic activity|GO:0016903,oxidoreductase activity, acting on the aldehyde or oxo group of donors|GO:0016491,oxidoreductase activity	ath00620,Pyruvate metabolism|ath00020,Citrate cycle (TCA cycle)|ath00010,Glycolysis / Gluconeogenesis|ath01200,Carbon metabolism|ath01110,Biosynthesis of secondary metabolites|ath01100,Metabolic pathways	http://www.uniprot.org/uniprot/P52901	FALSE
489	5.76	5.85	70.5	gi|743925671	PREDICTED: small nuclear ribonucleoprotein E-like [Populus euphratica]	6	Populus euphratica	2.3121	0.3763	1.6444	0.9992	2.6062	0.2423	1.8535	0.6593	2.10405	1.07317	92.05	5e-54	Q8LAK5	At4g30330	GO:0044238,primary metabolic process|GO:0090304,nucleic acid metabolic process|GO:0034641,cellular nitrogen compound metabolic process|GO:0006807,nitrogen compound metabolic process|GO:0044237,cellular metabolic process|GO:1901360,organic cyclic compound metabolic process|GO:0006139,nucleobase-containing compound metabolic process|GO:0044260,cellular macromolecule metabolic process|GO:0071704,org…	GO:0043229,intracellular organelle|GO:0043227,membrane-bounded organelle|GO:0043226,organelle|GO:0005737,cytoplasm|GO:0005634,nucleus|GO:0030529,ribonucleoprotein complex|GO:0019013,viral nucleocapsid|GO:0019012,virion|GO:0032991,macromolecular complex|GO:0043231,intracellular membrane-bounded organelle|GO:0005829,cytosol|GO:0044464,cell part|GO:0005623,cell|GO:0005622,intracellular|GO:0044446,in…		ath03040,Spliceosome	http://www.uniprot.org/uniprot/Q8LAK5	FALSE
310	8.42	8.46	28.3	gi|743925951	PREDICTED: NADP-dependent malic enzyme [Populus euphratica]	13	Populus euphratica	3.1623	0.085	2.9923	0.0929	2.1281	0.1995	2.0324	0.2257	2.57878	1.36669	81.35	0	Q9CA83	NADP-ME4	GO:0006633,fatty acid biosynthetic process|GO:0006631,fatty acid metabolic process|GO:0022607,cellular component assembly|GO:0051289,protein homotetramerization|GO:0043933,macromolecular complex subunit organization|GO:0046364,monosaccharide biosynthetic process|GO:0019752,carboxylic acid metabolic process|GO:0044248,cellular catabolic process|GO:0043436,oxoacid metabolic process|GO:0044281,small…	GO:0005737,cytoplasm|GO:0009536,plastid|GO:0043231,intracellular membrane-bounded organelle|GO:0044464,cell part|GO:0044444,cytoplasmic part|GO:0005623,cell|GO:0005622,intracellular|GO:0043229,intracellular organelle|GO:0044424,intracellular part|GO:0043227,membrane-bounded organelle|GO:0043226,organelle|GO:0009507,chloroplast	GO:0004470,malic enzyme activity|GO:0051287,NAD binding|GO:0008948,oxaloacetate decarboxylase activity|GO:0008270,zinc ion binding|GO:0043167,ion binding|GO:1901363,heterocyclic compound binding|GO:1901265,nucleoside phosphate binding|GO:0016491,oxidoreductase activity|GO:0043169,cation binding|GO:0046914,transition metal ion binding|GO:0016829,lyase activity|GO:0000166,nucleotide binding|GO:0046…	ath00620,Pyruvate metabolism|ath00710,Carbon fixation in photosynthetic organisms|ath01100,Metabolic pathways|ath01200,Carbon metabolism	http://www.uniprot.org/uniprot/Q9CA83	FALSE
846	2.78	2.86	9.5	gi|743926173	PREDICTED: LOW QUALITY PROTEIN: THO complex subunit 4D-like [Populus euphratica]	3	Populus euphratica	1.6293	0.4272	1.4588	0.5064	2.9376	0.2202	2.6303	0.2427	2.164	1.1137	72	0.0002	Q6NQ72	ALY4	GO:0015931,nucleobase-containing compound transport|GO:0050658,RNA transport|GO:0006403,RNA localization|GO:0033036,macromolecule localization|GO:0006810,transport|GO:0050657,nucleic acid transport|GO:0071705,nitrogen compound transport|GO:0071702,organic substance transport|GO:0051236,establishment of RNA localization|GO:0051028,mRNA transport|GO:0051234,establishment of localization|GO:0051179,…	GO:0044446,intracellular organelle part|GO:0043231,intracellular membrane-bounded organelle|GO:0031981,nuclear lumen|GO:0043233,organelle lumen|GO:0005634,nucleus|GO:0005730,nucleolus|GO:0044464,cell part|GO:0043232,intracellular non-membrane-bounded organelle|GO:0031974,membrane-enclosed lumen|GO:0005622,intracellular|GO:0005654,nucleoplasm|GO:0070013,intracellular organelle lumen|GO:0043229,int…	GO:0097159,organic cyclic compound binding|GO:0000166,nucleotide binding|GO:0036094,small molecule binding|GO:0003723,RNA binding|GO:0003676,nucleic acid binding|GO:1901363,heterocyclic compound binding|GO:1901265,nucleoside phosphate binding|GO:0005488,binding	ath03015,mRNA surveillance pathway|ath03040,Spliceosome|ath03013,RNA transport	http://www.uniprot.org/uniprot/Q6NQ72	FALSE
1115	2.01	2.02	3.4	gi|743926771	PREDICTED: probable pectinesterase/pectinesterase inhibitor 51 [Populus euphratica]	1	Populus euphratica	2.6792	0.4601	2.9376	0.3296	2.1281	0.6333	2.3121	0.4243	2.51425	1.33013	34.5	8e-101	Q9FJ21	PME58	GO:0009892,negative regulation of metabolic process|GO:0019222,regulation of metabolic process|GO:0010393,galacturonan metabolic process|GO:0045229,external encapsulating structure organization|GO:0050789,regulation of biological process|GO:0071840,cellular component organization or biogenesis|GO:1901575,organic substance catabolic process|GO:0071555,cell wall organization|GO:0016043,cellular com…	GO:0005618,cell wall|GO:0044464,cell part|GO:0071944,cell periphery|GO:0005623,cell|GO:0030312,external encapsulating structure|GO:0005576,extracellular region	GO:0016787,hydrolase activity|GO:0030234,enzyme regulator activity|GO:0052689,carboxylic ester hydrolase activity|GO:0016788,hydrolase activity, acting on ester bonds|GO:0003824,catalytic activity|GO:0030599,pectinesterase activity|GO:0045330,aspartyl esterase activity|GO:0004857,enzyme inhibitor activity|GO:0098772,molecular function regulator	ath00500,Starch and sucrose metabolism|ath00040,Pentose and glucuronate interconversions|ath01100,Metabolic pathways	http://www.uniprot.org/uniprot/Q9FJ21	FALSE
1347	2	2	4.1	gi|743930121	PREDICTED: glucose-6-phosphate/phosphate translocator 1, chloroplastic isoform X2 [Populus euphratica]	1	Populus euphratica	8.091	0.225	5.4954	0.2521	8.7096	0.2202	4.0926	0.2462	6.59715	2.72184	78.5	0	Q9M5A9	GPT1	GO:0019320,hexose catabolic process|GO:0015760,glucose-6-phosphate transport|GO:0015851,nucleobase transport|GO:0046365,monosaccharide catabolic process|GO:0035436,triose phosphate transmembrane transport|GO:0006863,purine nucleobase transport|GO:0008152,metabolic process|GO:0009790,embryo development|GO:0006820,anion transport|GO:0051179,localization|GO:0021700,developmental maturation|GO:000727…	GO:0031975,envelope|GO:0043229,intracellular organelle|GO:0042170,plastid membrane|GO:0043227,membrane-bounded organelle|GO:0043226,organelle|GO:0031224,intrinsic component of membrane|GO:0005737,cytoplasm|GO:0009941,chloroplast envelope|GO:0009536,plastid|GO:0031090,organelle membrane|GO:0016021,integral component of membrane|GO:0016020,membrane|GO:0044435,plastid part|GO:0044434,chloroplast par…	GO:0005342,organic acid transmembrane transporter activity|GO:0008028,monocarboxylic acid transmembrane transporter activity|GO:0015605,organophosphate ester transmembrane transporter activity|GO:1901476,carbohydrate transporter activity|GO:0008509,anion transmembrane transporter activity|GO:0015120,phosphoglycerate transmembrane transporter activity|GO:0015144,carbohydrate transmembrane transpor…		http://www.uniprot.org/uniprot/Q9M5A9	FALSE
1213	2	4	7.8	gi|743932656	PREDICTED: hevamine-A-like [Populus euphratica]	2	Populus euphratica	2.8054	0.1957	2.8314	0.2021	3.4995	0.1594	3.5318	0.1637	3.16703	1.66313	74.46	6e-142	P19172	CHIB1	GO:0046348,amino sugar catabolic process|GO:0009409,response to cold|GO:0044707,single-multicellular organism process|GO:0051716,cellular response to stimulus|GO:0070647,protein modification by small protein conjugation or removal|GO:0009611,response to wounding|GO:0018193,peptidyl-amino acid modification|GO:0048731,system development|GO:0003006,developmental process involved in reproduction|GO:0…	GO:0005576,extracellular region|GO:0005615,extracellular space|GO:0044421,extracellular region part	GO:0016787,hydrolase activity|GO:0008843,endochitinase activity|GO:0016798,hydrolase activity, acting on glycosyl bonds|GO:0003824,catalytic activity|GO:0004553,hydrolase activity, hydrolyzing O-glycosyl compounds|GO:0004568,chitinase activity	ath00520,Amino sugar and nucleotide sugar metabolism|ath01100,Metabolic pathways	http://www.uniprot.org/uniprot/P19172	FALSE
171	12.42	12.69	52.6	gi|743932942	PREDICTED: elongation factor Tu, mitochondrial-like [Populus euphratica]	9	Populus euphratica	2.5119	0.1525	1.2474	0.7587	8.7096	0.0673	4.3652	0.2219	4.20852	2.07331	30.14	2e-42	Q8W4H7	A2	GO:0044249,cellular biosynthetic process|GO:0034641,cellular nitrogen compound metabolic process|GO:0006807,nitrogen compound metabolic process|GO:0034645,cellular macromolecule biosynthetic process|GO:1901576,organic substance biosynthetic process|GO:0044267,cellular protein metabolic process|GO:0044260,cellular macromolecule metabolic process|GO:0043043,peptide biosynthetic process|GO:0071704,o…	GO:0005737,cytoplasm|GO:0005794,Golgi apparatus|GO:0043231,intracellular membrane-bounded organelle|GO:0005773,vacuole|GO:0005829,cytosol|GO:0044464,cell part|GO:0044444,cytoplasmic part|GO:0005739,mitochondrion|GO:0005622,intracellular|GO:0055044,symplast|GO:0043229,intracellular organelle|GO:0030054,cell junction|GO:0005911,cell-cell junction|GO:0044424,intracellular part|GO:0005623,cell|GO:004…	GO:0035639,purine ribonucleoside triphosphate binding|GO:0005488,binding|GO:0003676,nucleic acid binding|GO:0043167,ion binding|GO:1901363,heterocyclic compound binding|GO:0001883,purine nucleoside binding|GO:0001882,nucleoside binding|GO:0043168,anion binding|GO:0016462,pyrophosphatase activity|GO:0000166,nucleotide binding|GO:0032561,guanyl ribonucleotide binding|GO:1901265,nucleoside phosphate…	ath03013,RNA transport	http://www.uniprot.org/uniprot/Q8W4H7	FALSE
812	3.11	8.09	33.3	gi|743932986	PREDICTED: mitochondrial outer membrane protein porin of 36 kDa [Populus euphratica]	15	Populus euphratica	2.355	0.5109	2.8576	0.4704	2.0893	0.4603	2.5351	0.4259	2.45925	1.29822	71.74	9e-136	Q9SRH5	VDAC1	GO:0022607,cellular component assembly|GO:0051707,response to other organism|GO:0051234,establishment of localization|GO:0070271,protein complex biogenesis|GO:0043933,macromolecular complex subunit organization|GO:0051049,regulation of transport|GO:0044248,cellular catabolic process|GO:0044249,cellular biosynthetic process|GO:0006820,anion transport|GO:0043248,proteasome assembly|GO:0034622,cellu…	GO:0005794,Golgi apparatus|GO:0031975,envelope|GO:0043229,intracellular organelle|GO:0071944,cell periphery|GO:0043227,membrane-bounded organelle|GO:0043226,organelle|GO:0031224,intrinsic component of membrane|GO:0005737,cytoplasm|GO:0009941,chloroplast envelope|GO:0009536,plastid|GO:0046930,pore complex|GO:0031090,organelle membrane|GO:0005773,vacuole|GO:0016021,integral component of membrane|GO…	GO:0022891,substrate-specific transmembrane transporter activity|GO:0005244,voltage-gated ion channel activity|GO:0005488,binding|GO:0022836,gated channel activity|GO:0005215,transporter activity|GO:0008509,anion transmembrane transporter activity|GO:0015288,porin activity|GO:0008308,voltage-gated anion channel activity|GO:0015075,ion transmembrane transporter activity|GO:0022832,voltage-gated ch…		http://www.uniprot.org/uniprot/Q9SRH5	FALSE
1276	2	2	3.1	gi|743938710	PREDICTED: squamous cell carcinoma antigen recognized by T-cells 3-like [Populus euphratica]	1	Populus euphratica	5.5463	0.1703	5.3951	0.1717	9.2045	0.1393	8.8716	0.1403	7.25437	2.85885	54.58	0	F4JQ75	EMB140	GO:0048856,anatomical structure development|GO:0030154,cell differentiation|GO:0019953,sexual reproduction|GO:0007292,female gamete generation|GO:0034641,cellular nitrogen compound metabolic process|GO:0006807,nitrogen compound metabolic process|GO:0007275,multicellular organismal development|GO:0044699,single-organism process|GO:0048229,gametophyte development|GO:0009553,embryo sac development|G…	GO:0043231,intracellular membrane-bounded organelle|GO:0005634,nucleus|GO:0044464,cell part|GO:0005623,cell|GO:0005622,intracellular|GO:0043229,intracellular organelle|GO:0044424,intracellular part|GO:0043227,membrane-bounded organelle|GO:0043226,organelle	GO:0097159,organic cyclic compound binding|GO:0000166,nucleotide binding|GO:0036094,small molecule binding|GO:0005488,binding|GO:0003676,nucleic acid binding|GO:1901363,heterocyclic compound binding|GO:1901265,nucleoside phosphate binding		http://www.uniprot.org/uniprot/F4JQ75	FALSE
476	5.96	6	17.9	gi|743939684	PREDICTED: nuclear transcription factor Y subunit C-9-like isoform X1 [Populus euphratica]	4	Populus euphratica	1.0864	0.2923	1.3804	0.8835	2.7797	0.2447	3.8019	0.1024	2.2621	1.17766	70.91	9e-77	Q8L4B2	NFYC9	GO:0080090,regulation of primary metabolic process|GO:0019222,regulation of metabolic process|GO:0031326,regulation of cellular biosynthetic process|GO:0031323,regulation of cellular metabolic process|GO:0090304,nucleic acid metabolic process|GO:0044249,cellular biosynthetic process|GO:0034641,cellular nitrogen compound metabolic process|GO:0006807,nitrogen compound metabolic process|GO:0034645,c…	GO:0043229,intracellular organelle|GO:0043227,membrane-bounded organelle|GO:0043226,organelle|GO:0005737,cytoplasm|GO:0016602,CCAAT-binding factor complex|GO:0005634,nucleus|GO:0044798,nuclear transcription factor complex|GO:0043234,protein complex|GO:0032991,macromolecular complex|GO:0043231,intracellular membrane-bounded organelle|GO:0005829,cytosol|GO:0044464,cell part|GO:0090575,RNA polymeras…	GO:0043565,sequence-specific DNA binding|GO:0005515,protein binding|GO:0003700,transcription factor activity, sequence-specific DNA binding|GO:0097159,organic cyclic compound binding|GO:0005488,binding|GO:0003676,nucleic acid binding|GO:0003677,DNA binding|GO:0046983,protein dimerization activity|GO:0046982,protein heterodimerization activity|GO:1901363,heterocyclic compound binding|GO:0001071,nu…		http://www.uniprot.org/uniprot/Q8L4B2	FALSE
306	8.54	8.57	22.7	gi|743940375	PREDICTED: eukaryotic translation initiation factor 3 subunit H-like [Populus euphratica]	8	Populus euphratica	1.2246	0.9573	2.5351	0.4306	3.8726	0.1328	10.3753	0.0774	4.5019	2.17053	83.88	0	Q9C5Z2	TIF3H1	GO:0022607,cellular component assembly|GO:0043933,macromolecular complex subunit organization|GO:0070647,protein modification by small protein conjugation or removal|GO:0009791,post-embryonic development|GO:0044249,cellular biosynthetic process|GO:0034641,cellular nitrogen compound metabolic process|GO:0006807,nitrogen compound metabolic process|GO:0009416,response to light stimulus|GO:0034645,ce…	GO:0043234,protein complex|GO:0005737,cytoplasm|GO:0005852,eukaryotic translation initiation factor 3 complex|GO:0016282,eukaryotic 43S preinitiation complex|GO:0005829,cytosol|GO:0070993,translation preinitiation complex|GO:0005623,cell|GO:0030529,ribonucleoprotein complex|GO:0044444,cytoplasmic part|GO:0044424,intracellular part|GO:0033290,eukaryotic 48S preinitiation complex|GO:0005622,intrace…	GO:0005488,binding|GO:0003676,nucleic acid binding|GO:0097159,organic cyclic compound binding|GO:0008135,translation factor activity, RNA binding|GO:0003723,RNA binding|GO:0005515,protein binding|GO:1901363,heterocyclic compound binding|GO:0003743,translation initiation factor activity	ath03013,RNA transport	http://www.uniprot.org/uniprot/Q9C5Z2	FALSE
12	45.34	47.59	68.5	gi|743942926	PREDICTED: ATP synthase subunit beta, mitochondrial-like [Populus euphratica]	136	Populus euphratica	1.4454	0.0772	1.6749	0.0167	2.3768	0.005	2.5823	0.001	2.01985	1.01425	84.86	0	P83483	At5g08670	GO:0009167,purine ribonucleoside monophosphate metabolic process|GO:0009165,nucleotide biosynthetic process|GO:0009163,nucleoside biosynthetic process|GO:0009161,ribonucleoside monophosphate metabolic process|GO:1901362,organic cyclic compound biosynthetic process|GO:0042451,purine nucleoside biosynthetic process|GO:0009168,purine ribonucleoside monophosphate biosynthetic process|GO:0044710,singl…	GO:0044464,cell part|GO:0031975,envelope|GO:0043229,intracellular organelle|GO:0043227,membrane-bounded organelle|GO:0043226,organelle|GO:0045261,proton-transporting ATP synthase complex, catalytic core F(1)|GO:0033178,proton-transporting two-sector ATPase complex, catalytic domain|GO:0031090,organelle membrane|GO:0098796,membrane protein complex|GO:0016020,membrane|GO:0044444,cytoplasmic part|GO…	GO:0035639,purine ribonucleoside triphosphate binding|GO:0005488,binding|GO:0016887,ATPase activity|GO:0043167,ion binding|GO:1901363,heterocyclic compound binding|GO:0032550,purine ribonucleoside binding|GO:0001882,nucleoside binding|GO:0043168,anion binding|GO:0042625,ATPase activity, coupled to transmembrane movement of ions|GO:0042626,ATPase activity, coupled to transmembrane movement of subs…	ath00190,Oxidative phosphorylation|ath01100,Metabolic pathways	http://www.uniprot.org/uniprot/P83483	FALSE
1397	2	2	5.9	gi|743943838	PREDICTED: uncharacterized protein LOC105119937 [Populus euphratica]	1	Populus euphratica	2.0893	0.3539	2.0893	0.3547	3.6644	0.26	3.5318	0.2604	2.8437	1.50777	63.23	5e-67	Q6NPM5	At5g62200	GO:0006950,response to stress|GO:0019752,carboxylic acid metabolic process|GO:0009694,jasmonic acid metabolic process|GO:0044249,cellular biosynthetic process|GO:0044281,small molecule metabolic process|GO:0044283,small molecule biosynthetic process|GO:0072330,monocarboxylic acid biosynthetic process|GO:0044699,single-organism process|GO:1901576,organic substance biosynthetic process|GO:0044710,s…	GO:0043229,intracellular organelle|GO:0043227,membrane-bounded organelle|GO:0043226,organelle|GO:0031224,intrinsic component of membrane|GO:0031225,anchored component of membrane|GO:0005737,cytoplasm|GO:0031090,organelle membrane|GO:0005773,vacuole|GO:0098805,whole membrane|GO:0016020,membrane|GO:0005774,vacuolar membrane|GO:0044437,vacuolar part|GO:0098588,bounding membrane of organelle|GO:00432…			http://www.uniprot.org/uniprot/Q6NPM5	FALSE

## Sheet: Function classification in DEPs
Table.S1 List of the change proteins in Cinnamomum camphora L. leaves under 103.45 mM NaCl stress by iTRAQ
Number	Protein Name	Primary protein ID	Percent Coverage (% cov)	No.of unique Peptides	mean ratio (±SD)	Uniprot	Genename	Biological Process	Cell Component	Molecular Function	KEGG Pathways	UNIPROT_URL	Transcription Factor
	The up-differentially expressed proteins (95)
	Biosynthesis of amino acids
669	hypothetical protein POPTR_0005s10290g	gi|566170533	17.1	3	5.83±0.63	Q9SHP0	PSAT2	GO:0010038,response to metal ion|GO:0019752,carboxylic acid metabolic process|GO:0044249,cellular biosynthetic process|GO:0006807,nitrogen compound metabolic process|GO:0044281,small molecule metabolic process|GO:0044283,small molecule biosynthetic process|GO:0009069,serine family amino acid metabolic process|GO:0044699,single-organism process|GO:1901576,organic substance biosynthetic process|GO:…	GO:0031976,plastid thylakoid|GO:0043229,intracellular organelle|GO:0043227,membrane-bounded organelle|GO:0043226,organelle|GO:0009579,thylakoid|GO:0009534,chloroplast thylakoid|GO:0031984,organelle subcompartment|GO:0009532,plastid stroma|GO:0009570,chloroplast stroma|GO:0044435,plastid part|GO:0044434,chloroplast part|GO:0005737,cytoplasm|GO:0009536,plastid|GO:0009507,chloroplast|GO:0043231,intr…	GO:0004648,O-phospho-L-serine:2-oxoglutarate aminotransferase activity|GO:0003824,catalytic activity|GO:0008483,transaminase activity|GO:0016740,transferase activity|GO:0016769,transferase activity, transferring nitrogenous groups	ath01230,Biosynthesis of amino acids|ath00260,Glycine, serine and threonine metabolism|ath01100,Metabolic pathways|ath01200,Carbon metabolism|ath00750,Vitamin B6 metabolism	http://www.uniprot.org/uniprot/Q9SHP0	FALSE
596	PREDICTED: aspartate aminotransferase, cytoplasmic	gi|743814108	25.2	11	3.17±1.13	P46644	ASP3	GO:0022622,root system development|GO:0034440,lipid oxidation|GO:0048589,developmental growth|GO:0048588,developmental cell growth|GO:0048468,cell development|GO:0048469,cell maturation|GO:0043449,cellular alkene metabolic process|GO:0044281,small molecule metabolic process|GO:0044282,small molecule catabolic process|GO:0009693,ethylene biosynthetic process|GO:0071840,cellular component organizat…	GO:0005737,cytoplasm|GO:0009536,plastid|GO:0043231,intracellular membrane-bounded organelle|GO:0044464,cell part|GO:0005829,cytosol|GO:0016020,membrane|GO:0005777,peroxisome|GO:0044444,cytoplasmic part|GO:0005623,cell|GO:0005622,intracellular|GO:0042579,microbody|GO:0043229,intracellular organelle|GO:0044424,intracellular part|GO:0043227,membrane-bounded organelle|GO:0043226,organelle|GO:0009507,…	GO:0043168,anion binding|GO:0008483,transaminase activity|GO:0097159,organic cyclic compound binding|GO:0003824,catalytic activity|GO:0070546,L-phenylalanine aminotransferase activity|GO:1901363,heterocyclic compound binding|GO:0004069,L-aspartate:2-oxoglutarate aminotransferase activity|GO:0016740,transferase activity|GO:0048037,cofactor binding|GO:0080130,L-phenylalanine:2-oxoglutarate aminotra…	ath01230,Biosynthesis of amino acids|ath00400,Phenylalanine, tyrosine and tryptophan biosynthesis|ath00220,Arginine biosynthesis|ath00270,Cysteine and methionine metabolism|ath01210,2-Oxocarboxylic acid metabolism|ath00350,Tyrosine metabolism|ath00950,Isoquinoline alkaloid biosynthesis|ath00360,Phenylalanine metabolism|ath01100,Metabolic pathways|ath00710,Carbon fixation in photosynthetic organis…	http://www.uniprot.org/uniprot/P46644	FALSE
202	PREDICTED: aspartate aminotransferase, cytoplasmic-like	gi|743909812	29	12	2.5±0.22	P46645	ASP2	GO:0009693,ethylene biosynthetic process|GO:0019752,carboxylic acid metabolic process|GO:0044249,cellular biosynthetic process|GO:0043449,cellular alkene metabolic process|GO:0006807,nitrogen compound metabolic process|GO:0044281,small molecule metabolic process|GO:0009692,ethylene metabolic process|GO:0009064,glutamine family amino acid metabolic process|GO:0044699,single-organism process|GO:190…	GO:0043229,intracellular organelle|GO:0071944,cell periphery|GO:0043227,membrane-bounded organelle|GO:0043226,organelle|GO:0030054,cell junction|GO:0005737,cytoplasm|GO:0031090,organelle membrane|GO:0005773,vacuole|GO:0098805,whole membrane|GO:0016020,membrane|GO:0005774,vacuolar membrane|GO:0044437,vacuolar part|GO:0005794,Golgi apparatus|GO:0098588,bounding membrane of organelle|GO:0030312,exte…	GO:0043168,anion binding|GO:0043169,cation binding|GO:0046872,metal ion binding|GO:0046914,transition metal ion binding|GO:0008483,transaminase activity|GO:0097159,organic cyclic compound binding|GO:0003824,catalytic activity|GO:0043167,ion binding|GO:0070546,L-phenylalanine aminotransferase activity|GO:1901363,heterocyclic compound binding|GO:0004069,L-aspartate:2-oxoglutarate aminotransferase a…	ath01230,Biosynthesis of amino acids|ath00400,Phenylalanine, tyrosine and tryptophan biosynthesis|ath00220,Arginine biosynthesis|ath00270,Cysteine and methionine metabolism|ath01210,2-Oxocarboxylic acid metabolism|ath00350,Tyrosine metabolism|ath00950,Isoquinoline alkaloid biosynthesis|ath00360,Phenylalanine metabolism|ath01100,Metabolic pathways|ath00710,Carbon fixation in photosynthetic organis…	http://www.uniprot.org/uniprot/P46645	FALSE
	Biosynthesis of secondary metabolites
1055	hypothetical protein POPTR_0006s14520g	gi|566176419	10.6	1	3.06±0.49	Q9FUP0	OPR3	GO:0009738,abscisic acid-activated signaling pathway|GO:0050794,regulation of cellular process|GO:0009694,jasmonic acid metabolic process|GO:0009695,jasmonic acid biosynthetic process|GO:0007165,signal transduction|GO:0044282,small molecule catabolic process|GO:0044283,small molecule biosynthetic process|GO:1901362,organic cyclic compound biosynthetic process|GO:1901360,organic cyclic compound me…	GO:0005737,cytoplasm|GO:0043231,intracellular membrane-bounded organelle|GO:0044464,cell part|GO:0005777,peroxisome|GO:0044444,cytoplasmic part|GO:0005623,cell|GO:0005622,intracellular|GO:0042579,microbody|GO:0043229,intracellular organelle|GO:0044424,intracellular part|GO:0043227,membrane-bounded organelle|GO:0043226,organelle	GO:0043168,anion binding|GO:0050662,coenzyme binding|GO:0016629,12-oxophytodienoate reductase activity|GO:0016628,oxidoreductase activity, acting on the CH-CH group of donors, NAD or NADP as acceptor|GO:0097367,carbohydrate derivative binding|GO:0097159,organic cyclic compound binding|GO:0016627,oxidoreductase activity, acting on the CH-CH group of donors|GO:0000166,nucleotide binding|GO:0036094,…	ath01110,Biosynthesis of secondary metabolites|ath01100,Metabolic pathways|ath00592,alpha-Linolenic acid metabolism	http://www.uniprot.org/uniprot/Q9FUP0	FALSE
351	PREDICTED: LL-diaminopimelate aminotransferase, chloroplastic [Populus euphratica]	gi|743795533	16.3	7	2.64±0.32	Q93ZN9	DAP	GO:0042221,response to chemical|GO:0009607,response to biotic stimulus|GO:0044238,primary metabolic process|GO:0009692,ethylene metabolic process|GO:0006950,response to stress|GO:0009627,systemic acquired resistance|GO:0044283,small molecule biosynthetic process|GO:0019752,carboxylic acid metabolic process|GO:0016053,organic acid biosynthetic process|GO:0044249,cellular biosynthetic process|GO:00…	GO:0005737,cytoplasm|GO:0009536,plastid|GO:0043231,intracellular membrane-bounded organelle|GO:0009532,plastid stroma|GO:0009570,chloroplast stroma|GO:0005829,cytosol|GO:0044464,cell part|GO:0044444,cytoplasmic part|GO:0005623,cell|GO:0005622,intracellular|GO:0044446,intracellular organelle part|GO:0043229,intracellular organelle|GO:0044435,plastid part|GO:0044434,chloroplast part|GO:0044424,intr…	GO:0043168,anion binding|GO:0043169,cation binding|GO:0046872,metal ion binding|GO:0046914,transition metal ion binding|GO:0003824,catalytic activity|GO:0010285,L,L-diaminopimelate aminotransferase activity|GO:0097159,organic cyclic compound binding|GO:0043167,ion binding|GO:1901363,heterocyclic compound binding|GO:0008483,transaminase activity|GO:0016740,transferase activity|GO:0048037,cofactor …	ath01110,Biosynthesis of secondary metabolites|ath01230,Biosynthesis of amino acids|ath00300,Lysine biosynthesis|ath01100,Metabolic pathways	http://www.uniprot.org/uniprot/Q93ZN9	FALSE
1085	PREDICTED: 3-phosphoshikimate 1-carboxyvinyltransferase 2-like	gi|743804902	7.9	3	2.48±0.78	P05466	At2g45300	GO:0044238,primary metabolic process|GO:0019752,carboxylic acid metabolic process|GO:0044249,cellular biosynthetic process|GO:0006807,nitrogen compound metabolic process|GO:0044281,small molecule metabolic process|GO:0044283,small molecule biosynthetic process|GO:1901362,organic cyclic compound biosynthetic process|GO:0044699,single-organism process|GO:1901576,organic substance biosynthetic proce…	GO:0005737,cytoplasm|GO:0009536,plastid|GO:0043231,intracellular membrane-bounded organelle|GO:0009532,plastid stroma|GO:0009570,chloroplast stroma|GO:0005829,cytosol|GO:0044464,cell part|GO:0044444,cytoplasmic part|GO:0005623,cell|GO:0005622,intracellular|GO:0044446,intracellular organelle part|GO:0043229,intracellular organelle|GO:0044435,plastid part|GO:0044434,chloroplast part|GO:0044424,intr…	GO:0016765,transferase activity, transferring alkyl or aryl (other than methyl) groups|GO:0016740,transferase activity|GO:0003824,catalytic activity|GO:0003866,3-phosphoshikimate 1-carboxyvinyltransferase activity	ath01110,Biosynthesis of secondary metabolites|ath00400,Phenylalanine, tyrosine and tryptophan biosynthesis|ath01100,Metabolic pathways|ath01230,Biosynthesis of amino acids	http://www.uniprot.org/uniprot/P05466	FALSE
59	PREDICTED: GDP-mannose 3,5-epimerase 2	gi|743866256	44	19	2.65±0.09	Q93VR3	At5g28840	GO:0046364,monosaccharide biosynthetic process|GO:0019752,carboxylic acid metabolic process|GO:0042364,water-soluble vitamin biosynthetic process|GO:0044723,single-organism carbohydrate metabolic process|GO:0044281,small molecule metabolic process|GO:0044283,small molecule biosynthetic process|GO:0044699,single-organism process|GO:0019853,L-ascorbic acid biosynthetic process|GO:0019852,L-ascorbic…	GO:0005737,cytoplasm|GO:0005829,cytosol|GO:0044464,cell part|GO:0005623,cell|GO:0005622,intracellular|GO:0044444,cytoplasmic part|GO:0044424,intracellular part	GO:0016857,racemase and epimerase activity, acting on carbohydrates and derivatives|GO:0016854,racemase and epimerase activity|GO:0016853,isomerase activity|GO:0050662,coenzyme binding|GO:0051287,NAD binding|GO:0000166,nucleotide binding|GO:0036094,small molecule binding|GO:0003824,catalytic activity|GO:0048037,cofactor binding|GO:0047918,GDP-mannose 3,5-epimerase activity|GO:0097159,organic cycl…	ath01110,Biosynthesis of secondary metabolites|ath00053,Ascorbate and aldarate metabolism|ath00520,Amino sugar and nucleotide sugar metabolism|ath01100,Metabolic pathways	http://www.uniprot.org/uniprot/Q93VR3	FALSE
	Environmental Information Processing; Signal transduction
866	PREDICTED: pyruvate dehydrogenase (acetyl-transferring) kinase, mitochondrial	gi|743910930	5.6	2	2.65±1.44	P49333	ETR1	GO:0009723,response to ethylene|GO:0009593,detection of chemical stimulus|GO:0048585,negative regulation of response to stimulus|GO:0048583,regulation of response to stimulus|GO:0048580,regulation of post-embryonic development|GO:0072359,circulatory system development|GO:0072358,cardiovascular system development|GO:0009690,cytokinin metabolic process|GO:0007165,signal transduction|GO:0023014,sign…	GO:0005783,endoplasmic reticulum|GO:0005789,endoplasmic reticulum membrane|GO:0042175,nuclear outer membrane-endoplasmic reticulum membrane network|GO:0043229,intracellular organelle|GO:0043227,membrane-bounded organelle|GO:0043226,organelle|GO:0031224,intrinsic component of membrane|GO:0005737,cytoplasm|GO:0031090,organelle membrane|GO:0016021,integral component of membrane|GO:0016020,membrane|G…	GO:0038023,signaling receptor activity|GO:0035639,purine ribonucleoside triphosphate binding|GO:0060089,molecular transducer activity|GO:0004872,receptor activity|GO:0004871,signal transducer activity|GO:0043167,ion binding|GO:1901363,heterocyclic compound binding|GO:0001883,purine nucleoside binding|GO:0001882,nucleoside binding|GO:0043168,anion binding|GO:0043169,cation binding|GO:0005057,recep…	ath04075,Plant hormone signal transduction	http://www.uniprot.org/uniprot/P49333	FALSE
	Genetic Information Processing; Folding, sorting and degradation
684	plasma membrane H+ ATPase family protein	gi|224143678	23.1	14	2.29±1.11	P20649	AHA1	GO:0009167,purine ribonucleoside monophosphate metabolic process|GO:0009165,nucleotide biosynthetic process|GO:0009163,nucleoside biosynthetic process|GO:0009161,ribonucleoside monophosphate metabolic process|GO:1901362,organic cyclic compound biosynthetic process|GO:0042451,purine nucleoside biosynthetic process|GO:0009168,purine ribonucleoside monophosphate biosynthetic process|GO:0044710,singl…	GO:0043229,intracellular organelle|GO:0071944,cell periphery|GO:0043227,membrane-bounded organelle|GO:0043226,organelle|GO:0031224,intrinsic component of membrane|GO:0005737,cytoplasm|GO:0005773,vacuole|GO:0016021,integral component of membrane|GO:0016020,membrane|GO:0030054,cell junction|GO:0005794,Golgi apparatus|GO:0055044,symplast|GO:0012505,endomembrane system|GO:0005911,cell-cell junction|G…	GO:0035639,purine ribonucleoside triphosphate binding|GO:0036442,hydrogen-exporting ATPase activity|GO:0005488,binding|GO:0016887,ATPase activity|GO:0043167,ion binding|GO:1901363,heterocyclic compound binding|GO:0032550,purine ribonucleoside binding|GO:0001882,nucleoside binding|GO:0043168,anion binding|GO:0042625,ATPase activity, coupled to transmembrane movement of ions|GO:0042626,ATPase activ…	ath00190,Oxidative phosphorylation	http://www.uniprot.org/uniprot/P20649	FALSE
5	PREDICTED: dnaJ protein homolog	gi|743831900	21.6	9	3.16±0.64	Q94AW8	ATJ3	GO:0050896,response to stimulus|GO:0009628,response to abiotic stimulus|GO:0006457,protein folding|GO:0034645,cellular macromolecule biosynthetic process|GO:0019222,regulation of metabolic process|GO:0061458,reproductive system development|GO:2000243,positive regulation of reproductive process|GO:2000241,regulation of reproductive process|GO:0018377,protein myristoylation|GO:0048582,positive regu…	GO:0031974,membrane-enclosed lumen|GO:0043229,intracellular organelle|GO:0043228,non-membrane-bounded organelle|GO:0043227,membrane-bounded organelle|GO:0043226,organelle|GO:0030054,cell junction|GO:0005737,cytoplasm|GO:0031981,nuclear lumen|GO:0005730,nucleolus|GO:0005618,cell wall|GO:0005634,nucleus|GO:0016020,membrane|GO:0030312,external encapsulating structure|GO:0055044,symplast|GO:0005911,c…	GO:0035639,purine ribonucleoside triphosphate binding|GO:0031072,heat shock protein binding|GO:0005488,binding|GO:0000166,nucleotide binding|GO:1901363,heterocyclic compound binding|GO:1901265,nucleoside phosphate binding|GO:0001882,nucleoside binding|GO:0043168,anion binding|GO:0043169,cation binding|GO:0051087,chaperone binding|GO:0051082,unfolded protein binding|GO:0043167,ion binding|GO:00018…	ath04141,Protein processing in endoplasmic reticulum	http://www.uniprot.org/uniprot/Q94AW8	FALSE
44	PREDICTED: enolase	gi|743896837	55.3	34	2.05±0.57	P25696	ENO2	GO:0080090,regulation of primary metabolic process|GO:0019222,regulation of metabolic process|GO:0019682,glyceraldehyde-3-phosphate metabolic process|GO:0009167,purine ribonucleoside monophosphate metabolic process|GO:0044281,small molecule metabolic process|GO:0009161,ribonucleoside monophosphate metabolic process|GO:1901362,organic cyclic compound biosynthetic process|GO:1901360,organic cyclic …	GO:0031975,envelope|GO:0048046,apoplast|GO:0043229,intracellular organelle|GO:0071944,cell periphery|GO:0043227,membrane-bounded organelle|GO:0043226,organelle|GO:0030054,cell junction|GO:0005737,cytoplasm|GO:0009536,plastid|GO:0005634,nucleus|GO:0016020,membrane|GO:0044444,cytoplasmic part|GO:0005739,mitochondrion|GO:0005576,extracellular region|GO:0043234,protein complex|GO:1902494,catalytic co…	GO:0043169,cation binding|GO:0046872,metal ion binding|GO:0046914,transition metal ion binding|GO:0043167,ion binding|GO:0016835,carbon-oxygen lyase activity|GO:0016836,hydro-lyase activity|GO:0000287,magnesium ion binding|GO:1901363,heterocyclic compound binding|GO:0004634,phosphopyruvate hydratase activity|GO:0003824,catalytic activity|GO:0005488,binding|GO:0003676,nucleic acid binding|GO:00036…	ath03018,RNA degradation|ath00010,Glycolysis / Gluconeogenesis|ath01230,Biosynthesis of amino acids|ath01200,Carbon metabolism|ath01110,Biosynthesis of secondary metabolites|ath01100,Metabolic pathways	http://www.uniprot.org/uniprot/P25696	FALSE
1413	PREDICTED: protein transport protein Sec61 subunit beta	gi|743902104	9.3	1	2.87±0.78	Q9FKK1	At5g60460	GO:0033036,macromolecule localization|GO:0034613,cellular protein localization|GO:0046907,intracellular transport|GO:0070727,cellular macromolecule localization|GO:0006886,intracellular protein transport|GO:0006810,transport|GO:0045184,establishment of protein localization|GO:0008104,protein localization|GO:0071702,organic substance transport|GO:0015031,protein transport|GO:0051234,establishment …	GO:0005784,Sec61 translocon complex|GO:0005783,endoplasmic reticulum|GO:0044464,cell part|GO:0005789,endoplasmic reticulum membrane|GO:0042175,nuclear outer membrane-endoplasmic reticulum membrane network|GO:0043229,intracellular organelle|GO:0071944,cell periphery|GO:0043227,membrane-bounded organelle|GO:0043226,organelle|GO:0005737,cytoplasm|GO:0031090,organelle membrane|GO:0016020,membrane|GO:…		ath03060,Protein export|ath04145,Phagosome|ath04141,Protein processing in endoplasmic reticulum	http://www.uniprot.org/uniprot/Q9FKK1	FALSE
38	PREDICTED: cell division cycle protein 48 homolog isoform X2	gi|743905573	39.9	22	2.28±0.68	Q9LZF6	CDC48E	GO:0033036,macromolecule localization|GO:0007049,cell cycle|GO:0006810,transport|GO:0009987,cellular process|GO:0045184,establishment of protein localization|GO:0008104,protein localization|GO:0044763,single-organism cellular process|GO:0051301,cell division|GO:0008152,metabolic process|GO:0071702,organic substance transport|GO:0015031,protein transport|GO:0051234,establishment of localization|GO…	GO:0043229,intracellular organelle|GO:0071944,cell periphery|GO:0043227,membrane-bounded organelle|GO:0043226,organelle|GO:0005856,cytoskeleton|GO:0005618,cell wall|GO:0005634,nucleus|GO:0005737,cytoplasm|GO:0005794,Golgi apparatus|GO:0030312,external encapsulating structure|GO:0012505,endomembrane system|GO:0009524,phragmoplast|GO:0043231,intracellular membrane-bounded organelle|GO:0043232,intra…	GO:0035639,purine ribonucleoside triphosphate binding|GO:0005488,binding|GO:0043167,ion binding|GO:1901363,heterocyclic compound binding|GO:1901265,nucleoside phosphate binding|GO:0001882,nucleoside binding|GO:0043168,anion binding|GO:0000166,nucleotide binding|GO:0001883,purine nucleoside binding|GO:0032549,ribonucleoside binding|GO:0017076,purine nucleotide binding|GO:0005524,ATP binding|GO:001…	ath04141,Protein processing in endoplasmic reticulum	http://www.uniprot.org/uniprot/Q9LZF6	FALSE
	Genetic Information Processing; Translation
1191	band 7 family protein	gi|224140937	36.1	9	2.06±0.32	Q9FM19	HIR1		GO:0043229,intracellular organelle|GO:0071944,cell periphery|GO:0043227,membrane-bounded organelle|GO:0043226,organelle|GO:0030054,cell junction|GO:0005737,cytoplasm|GO:0031090,organelle membrane|GO:0005773,vacuole|GO:0098805,whole membrane|GO:0016020,membrane|GO:0005774,vacuolar membrane|GO:0044437,vacuolar part|GO:0005794,Golgi apparatus|GO:0098588,bounding membrane of organelle|GO:0055044,symp…	GO:0019899,enzyme binding|GO:0019901,protein kinase binding|GO:0019900,kinase binding|GO:0005488,binding|GO:0005515,protein binding|GO:0043424,protein histidine kinase binding		http://www.uniprot.org/uniprot/Q9FM19	FALSE
1541	hypothetical protein POPTR_0004s22180g	gi|566167975	3.7	1	4.02±1.13	Q9FUP0	OPR3	GO:0009738,abscisic acid-activated signaling pathway|GO:0050794,regulation of cellular process|GO:0009694,jasmonic acid metabolic process|GO:0009695,jasmonic acid biosynthetic process|GO:0007165,signal transduction|GO:0044282,small molecule catabolic process|GO:0044283,small molecule biosynthetic process|GO:1901362,organic cyclic compound biosynthetic process|GO:1901360,organic cyclic compound me…	GO:0005737,cytoplasm|GO:0043231,intracellular membrane-bounded organelle|GO:0044464,cell part|GO:0005777,peroxisome|GO:0044444,cytoplasmic part|GO:0005623,cell|GO:0005622,intracellular|GO:0042579,microbody|GO:0043229,intracellular organelle|GO:0044424,intracellular part|GO:0043227,membrane-bounded organelle|GO:0043226,organelle	GO:0043168,anion binding|GO:0050662,coenzyme binding|GO:0016629,12-oxophytodienoate reductase activity|GO:0016628,oxidoreductase activity, acting on the CH-CH group of donors, NAD or NADP as acceptor|GO:0097367,carbohydrate derivative binding|GO:0097159,organic cyclic compound binding|GO:0016627,oxidoreductase activity, acting on the CH-CH group of donors|GO:0000166,nucleotide binding|GO:0036094,…	ath01110,Biosynthesis of secondary metabolites|ath01100,Metabolic pathways|ath00592,alpha-Linolenic acid metabolism	http://www.uniprot.org/uniprot/Q9FUP0	FALSE
799	hypothetical protein POPTR_0007s10970g	gi|566180686	22.3	10	3.32±1.99	Q94AC3	At4g36960			GO:0097159,organic cyclic compound binding|GO:0000166,nucleotide binding|GO:0036094,small molecule binding|GO:0005488,binding|GO:0003676,nucleic acid binding|GO:1901363,heterocyclic compound binding|GO:1901265,nucleoside phosphate binding	ath03015,mRNA surveillance pathway	http://www.uniprot.org/uniprot/Q94AC3	FALSE
1535	PREDICTED: probable alanine--tRNA ligase, chloroplastic isoform X6	gi|743792771	8	3	2.03±0.62	Q9FFC7	EMB86	GO:0044707,single-multicellular organism process|GO:0061458,reproductive system development|GO:0019752,carboxylic acid metabolic process|GO:0009791,post-embryonic development|GO:0009790,embryo development|GO:0009793,embryo development ending in seed dormancy|GO:0006807,nitrogen compound metabolic process|GO:0044281,small molecule metabolic process|GO:0034645,cellular macromolecule biosynthetic pr…	GO:0005737,cytoplasm|GO:0009536,plastid|GO:0043231,intracellular membrane-bounded organelle|GO:0009532,plastid stroma|GO:0009570,chloroplast stroma|GO:0016020,membrane|GO:0044464,cell part|GO:0044444,cytoplasmic part|GO:0005739,mitochondrion|GO:0005622,intracellular|GO:0044446,intracellular organelle part|GO:0043229,intracellular organelle|GO:0005623,cell|GO:0044435,plastid part|GO:0044434,chloro…	GO:0035639,purine ribonucleoside triphosphate binding|GO:0008270,zinc ion binding|GO:0003676,nucleic acid binding|GO:0043167,ion binding|GO:1901363,heterocyclic compound binding|GO:1901265,nucleoside phosphate binding|GO:0001882,nucleoside binding|GO:0043168,anion binding|GO:0043169,cation binding|GO:0004813,alanine-tRNA ligase activity|GO:0004812,aminoacyl-tRNA ligase activity|GO:0046914,transit…	ath00970,Aminoacyl-tRNA biosynthesis	http://www.uniprot.org/uniprot/Q9FFC7	FALSE
846	PREDICTED: LOW QUALITY PROTEIN: THO complex subunit 4D-like	gi|743926173	9.5	3	2.16±0.63	Q6NQ72	ALY4	GO:0015931,nucleobase-containing compound transport|GO:0050658,RNA transport|GO:0006403,RNA localization|GO:0033036,macromolecule localization|GO:0006810,transport|GO:0050657,nucleic acid transport|GO:0071705,nitrogen compound transport|GO:0071702,organic substance transport|GO:0051236,establishment of RNA localization|GO:0051028,mRNA transport|GO:0051234,establishment of localization|GO:0051179,…	GO:0044446,intracellular organelle part|GO:0043231,intracellular membrane-bounded organelle|GO:0031981,nuclear lumen|GO:0043233,organelle lumen|GO:0005634,nucleus|GO:0005730,nucleolus|GO:0044464,cell part|GO:0043232,intracellular non-membrane-bounded organelle|GO:0031974,membrane-enclosed lumen|GO:0005622,intracellular|GO:0005654,nucleoplasm|GO:0070013,intracellular organelle lumen|GO:0043229,int…	GO:0097159,organic cyclic compound binding|GO:0000166,nucleotide binding|GO:0036094,small molecule binding|GO:0003723,RNA binding|GO:0003676,nucleic acid binding|GO:1901363,heterocyclic compound binding|GO:1901265,nucleoside phosphate binding|GO:0005488,binding	ath03015,mRNA surveillance pathway|ath03040,Spliceosome|ath03013,RNA transport	http://www.uniprot.org/uniprot/Q6NQ72	FALSE
171	PREDICTED: elongation factor Tu, mitochondrial-like	gi|743932942	52.6	9	4.21±2.83	Q8W4H7	A2	GO:0044249,cellular biosynthetic process|GO:0034641,cellular nitrogen compound metabolic process|GO:0006807,nitrogen compound metabolic process|GO:0034645,cellular macromolecule biosynthetic process|GO:1901576,organic substance biosynthetic process|GO:0044267,cellular protein metabolic process|GO:0044260,cellular macromolecule metabolic process|GO:0043043,peptide biosynthetic process|GO:0071704,o…	GO:0005737,cytoplasm|GO:0005794,Golgi apparatus|GO:0043231,intracellular membrane-bounded organelle|GO:0005773,vacuole|GO:0005829,cytosol|GO:0044464,cell part|GO:0044444,cytoplasmic part|GO:0005739,mitochondrion|GO:0005622,intracellular|GO:0055044,symplast|GO:0043229,intracellular organelle|GO:0030054,cell junction|GO:0005911,cell-cell junction|GO:0044424,intracellular part|GO:0005623,cell|GO:004…	GO:0035639,purine ribonucleoside triphosphate binding|GO:0005488,binding|GO:0003676,nucleic acid binding|GO:0043167,ion binding|GO:1901363,heterocyclic compound binding|GO:0001883,purine nucleoside binding|GO:0001882,nucleoside binding|GO:0043168,anion binding|GO:0016462,pyrophosphatase activity|GO:0000166,nucleotide binding|GO:0032561,guanyl ribonucleotide binding|GO:1901265,nucleoside phosphate…	ath03013,RNA transport	http://www.uniprot.org/uniprot/Q8W4H7	FALSE
	Genetic Information Processing; Transcription
406	elongation factor Tu family protein	gi|566177270	8.9	3	2.22±0.44	Q9LNC5	F9P14.8	GO:0048856,anatomical structure development|GO:0008152,metabolic process|GO:0061458,reproductive system development|GO:2000241,regulation of reproductive process|GO:0019953,sexual reproduction|GO:0009791,post-embryonic development|GO:0009790,embryo development|GO:0009793,embryo development ending in seed dormancy|GO:0032501,multicellular organismal process|GO:0034645,cellular macromolecule biosyn…	GO:0031974,membrane-enclosed lumen|GO:0043229,intracellular organelle|GO:0071944,cell periphery|GO:0043227,membrane-bounded organelle|GO:0043226,organelle|GO:0016607,nuclear speck|GO:0016604,nuclear body|GO:0031981,nuclear lumen|GO:0005618,cell wall|GO:0005634,nucleus|GO:0016020,membrane|GO:0005654,nucleoplasm|GO:0044451,nucleoplasm part|GO:0005737,cytoplasm|GO:0030312,external encapsulating stru…	GO:0035639,purine ribonucleoside triphosphate binding|GO:0005488,binding|GO:0003676,nucleic acid binding|GO:0043167,ion binding|GO:1901363,heterocyclic compound binding|GO:0001883,purine nucleoside binding|GO:0001882,nucleoside binding|GO:0043168,anion binding|GO:0016462,pyrophosphatase activity|GO:0000166,nucleotide binding|GO:0032561,guanyl ribonucleotide binding|GO:1901265,nucleoside phosphate…	ath03040,Spliceosome	http://www.uniprot.org/uniprot/Q9LNC5	FALSE
489	PREDICTED: small nuclear ribonucleoprotein E-like	gi|743925671	70.5	6	2.1±0.38	Q8LAK5	At4g30330	GO:0044238,primary metabolic process|GO:0090304,nucleic acid metabolic process|GO:0034641,cellular nitrogen compound metabolic process|GO:0006807,nitrogen compound metabolic process|GO:0044237,cellular metabolic process|GO:1901360,organic cyclic compound metabolic process|GO:0006139,nucleobase-containing compound metabolic process|GO:0044260,cellular macromolecule metabolic process|GO:0071704,org…	GO:0043229,intracellular organelle|GO:0043227,membrane-bounded organelle|GO:0043226,organelle|GO:0005737,cytoplasm|GO:0005634,nucleus|GO:0030529,ribonucleoprotein complex|GO:0019013,viral nucleocapsid|GO:0019012,virion|GO:0032991,macromolecular complex|GO:0043231,intracellular membrane-bounded organelle|GO:0005829,cytosol|GO:0044464,cell part|GO:0005623,cell|GO:0005622,intracellular|GO:0044446,in…		ath03040,Spliceosome	http://www.uniprot.org/uniprot/Q8LAK5	FALSE
	Glycolysis / Gluconeogenesis
184	alcohol-dehydrogenase family protein [Populus trichocarpa]	gi|566179485	42.6	8	2.93±1.4	Q96533	ADH2	GO:0044710,single-organism metabolic process|GO:0071704,organic substance metabolic process|GO:0044699,single-organism process|GO:0006066,alcohol metabolic process|GO:0006067,ethanol metabolic process|GO:0044281,small molecule metabolic process|GO:0008152,metabolic process|GO:0034308,primary alcohol metabolic process|GO:1901615,organic hydroxy compound metabolic process|GO:0055114,oxidation-reduc…	GO:0005737,cytoplasm|GO:0044464,cell part|GO:0005623,cell|GO:0005622,intracellular|GO:0044424,intracellular part	GO:0005488,binding|GO:0043169,cation binding|GO:0016614,oxidoreductase activity, acting on CH-OH group of donors|GO:0046914,transition metal ion binding|GO:0016616,oxidoreductase activity, acting on the CH-OH group of donors, NAD or NADP as acceptor|GO:0004022,alcohol dehydrogenase (NAD) activity|GO:0043167,ion binding|GO:0003824,catalytic activity|GO:0008270,zinc ion binding|GO:0051903,S-(hydrox…	ath00350,Tyrosine metabolism|ath00010,Glycolysis / Gluconeogenesis|ath01200,Carbon metabolism|ath00071,Fatty acid degradation|ath01110,Biosynthesis of secondary metabolites|ath01100,Metabolic pathways	http://www.uniprot.org/uniprot/Q96533	FALSE
	Glyoxylate and dicarboxylate metabolism
240	PREDICTED: citrate synthase, mitochondrial isoform X4 [Populus euphratica]	gi|743916626	27.9	11	3.61±0.77	P20115	CSY4	GO:0009185,ribonucleoside diphosphate metabolic process|GO:0010035,response to inorganic substance|GO:0010038,response to metal ion|GO:0006732,coenzyme metabolic process|GO:0009141,nucleoside triphosphate metabolic process|GO:0009144,purine nucleoside triphosphate metabolic process|GO:0019752,carboxylic acid metabolic process|GO:0043436,oxoacid metabolic process|GO:0006099,tricarboxylic acid cycl…	GO:0031974,membrane-enclosed lumen|GO:0043229,intracellular organelle|GO:0071944,cell periphery|GO:0043227,membrane-bounded organelle|GO:0043226,organelle|GO:0005737,cytoplasm|GO:0009536,plastid|GO:0005618,cell wall|GO:0005739,mitochondrion|GO:0005759,mitochondrial matrix|GO:0005794,Golgi apparatus|GO:0030312,external encapsulating structure|GO:0012505,endomembrane system|GO:0009507,chloroplast|G…	GO:0035639,purine ribonucleoside triphosphate binding|GO:0036440,citrate synthase activity|GO:0008270,zinc ion binding|GO:0043167,ion binding|GO:1901363,heterocyclic compound binding|GO:1901265,nucleoside phosphate binding|GO:0001882,nucleoside binding|GO:0046912,transferase activity, transferring acyl groups, acyl groups converted into alkyl on transfer|GO:0043169,cation binding|GO:0046914,trans…	ath00630,Glyoxylate and dicarboxylate metabolism|ath00020,Citrate cycle (TCA cycle)|ath01210,2-Oxocarboxylic acid metabolism|ath01230,Biosynthesis of amino acids|ath01200,Carbon metabolism|ath01110,Biosynthesis of secondary metabolites|ath01100,Metabolic pathways	http://www.uniprot.org/uniprot/P20115	FALSE
	Metabolism; Amino acid metabolism
1161	adenosylhomocysteinase family protein	gi|224060333	37.3	25	3.94±0.25	O23255	SAHH1	GO:0022622,root system development|GO:0009628,response to abiotic stimulus|GO:0080090,regulation of primary metabolic process|GO:0019222,regulation of metabolic process|GO:0048588,developmental cell growth|GO:0051049,regulation of transport|GO:0048468,cell development|GO:0048469,cell maturation|GO:0009167,purine ribonucleoside monophosphate metabolic process|GO:0043933,macromolecular complex subu…	GO:0048046,apoplast|GO:0043229,intracellular organelle|GO:0071944,cell periphery|GO:0043227,membrane-bounded organelle|GO:0043226,organelle|GO:0030054,cell junction|GO:0005737,cytoplasm|GO:0031090,organelle membrane|GO:0005773,vacuole|GO:0098805,whole membrane|GO:0016020,membrane|GO:0005774,vacuolar membrane|GO:0044437,vacuolar part|GO:0005794,Golgi apparatus|GO:0098588,bounding membrane of organ…	GO:0016787,hydrolase activity|GO:0046872,metal ion binding|GO:0046914,transition metal ion binding|GO:0043169,cation binding|GO:0016801,hydrolase activity, acting on ether bonds|GO:0004013,adenosylhomocysteinase activity|GO:0016802,trialkylsulfonium hydrolase activity|GO:0043167,ion binding|GO:0003824,catalytic activity|GO:0005488,binding|GO:0005507,copper ion binding	ath00270,Cysteine and methionine metabolism|ath01100,Metabolic pathways	http://www.uniprot.org/uniprot/O23255	FALSE
214	hypothetical protein POPTR_0008s01000g	gi|224100535	19.3	9	3.6±0.61	O04130	PGDH2	GO:0019752,carboxylic acid metabolic process|GO:0044249,cellular biosynthetic process|GO:0006807,nitrogen compound metabolic process|GO:0044281,small molecule metabolic process|GO:0044283,small molecule biosynthetic process|GO:0009069,serine family amino acid metabolic process|GO:0044699,single-organism process|GO:1901576,organic substance biosynthetic process|GO:0044710,single-organism metabolic…	GO:0005737,cytoplasm|GO:0009536,plastid|GO:0043231,intracellular membrane-bounded organelle|GO:0044464,cell part|GO:0044444,cytoplasmic part|GO:0005623,cell|GO:0005622,intracellular|GO:0043229,intracellular organelle|GO:0044424,intracellular part|GO:0043227,membrane-bounded organelle|GO:0043226,organelle|GO:0009507,chloroplast	GO:0043168,anion binding|GO:0050662,coenzyme binding|GO:0016614,oxidoreductase activity, acting on CH-OH group of donors|GO:0016616,oxidoreductase activity, acting on the CH-OH group of donors, NAD or NADP as acceptor|GO:0043177,organic acid binding|GO:0051287,NAD binding|GO:0031406,carboxylic acid binding|GO:0000166,nucleotide binding|GO:0036094,small molecule binding|GO:0003824,catalytic activi…	ath00260,Glycine, serine and threonine metabolism|ath01100,Metabolic pathways|ath01200,Carbon metabolism|ath01230,Biosynthesis of amino acids	http://www.uniprot.org/uniprot/O04130	FALSE
435	PREDICTED: 5-methyltetrahydropteroyltriglutamate--homocysteine methyltransferase-like	gi|743796608	19.7	10	5.23±3.69	O50008	MS1	GO:0009628,response to abiotic stimulus|GO:0010038,response to metal ion|GO:0006950,response to stress|GO:1990267,response to transition metal nanoparticle|GO:0019752,carboxylic acid metabolic process|GO:0044249,cellular biosynthetic process|GO:0006807,nitrogen compound metabolic process|GO:0009067,aspartate family amino acid biosynthetic process|GO:0009066,aspartate family amino acid metabolic p…	GO:0048046,apoplast|GO:0042579,microbody|GO:0043229,intracellular organelle|GO:0071944,cell periphery|GO:0043227,membrane-bounded organelle|GO:0043226,organelle|GO:0030054,cell junction|GO:0005737,cytoplasm|GO:0009536,plastid|GO:0031090,organelle membrane|GO:0009532,plastid stroma|GO:0005773,vacuole|GO:0009570,chloroplast stroma|GO:0098805,whole membrane|GO:0016020,membrane|GO:0005777,peroxisome|…	GO:0043169,cation binding|GO:0005507,copper ion binding|GO:0046914,transition metal ion binding|GO:0046872,metal ion binding|GO:0042084,5-methyltetrahydrofolate-dependent methyltransferase activity|GO:0042085,5-methyltetrahydropteroyltri-L-glutamate-dependent methyltransferase activity|GO:0043167,ion binding|GO:0008172,S-methyltransferase activity|GO:0003824,catalytic activity|GO:0016740,transfer…	ath00270,Cysteine and methionine metabolism|ath01110,Biosynthesis of secondary metabolites|ath01230,Biosynthesis of amino acids|ath00450,Selenocompound metabolism|ath01100,Metabolic pathways	http://www.uniprot.org/uniprot/O50008	FALSE
455	PREDICTED: D-3-phosphoglycerate dehydrogenase 3, chloroplastic-like	gi|743803571	15.9	6	2.56±0.97	O49485	PGDH1	GO:0044707,single-multicellular organism process|GO:0061458,reproductive system development|GO:0019752,carboxylic acid metabolic process|GO:0009791,post-embryonic development|GO:0009790,embryo development|GO:0009793,embryo development ending in seed dormancy|GO:0006807,nitrogen compound metabolic process|GO:0044281,small molecule metabolic process|GO:0044283,small molecule biosynthetic process|GO…	GO:0043229,intracellular organelle|GO:0043227,membrane-bounded organelle|GO:0043226,organelle|GO:0005737,cytoplasm|GO:0044446,intracellular organelle part|GO:0009536,plastid|GO:0009532,plastid stroma|GO:0009570,chloroplast stroma|GO:0016020,membrane|GO:0005739,mitochondrion|GO:0044435,plastid part|GO:0044434,chloroplast part|GO:0009507,chloroplast|GO:0043231,intracellular membrane-bounded organel…	GO:0035639,purine ribonucleoside triphosphate binding|GO:0051287,NAD binding|GO:0005488,binding|GO:0043167,ion binding|GO:0016597,amino acid binding|GO:1901363,heterocyclic compound binding|GO:1901265,nucleoside phosphate binding|GO:0001882,nucleoside binding|GO:0043168,anion binding|GO:0050662,coenzyme binding|GO:0000166,nucleotide binding|GO:0004617,phosphoglycerate dehydrogenase activity|GO:00…	ath00260,Glycine, serine and threonine metabolism|ath01100,Metabolic pathways|ath01200,Carbon metabolism|ath01230,Biosynthesis of amino acids	http://www.uniprot.org/uniprot/O49485	FALSE
1189	PREDICTED: D-3-phosphoglycerate dehydrogenase 2, chloroplastic-like	gi|743906187	15.1	6	2.66±0.47	O04130	PGDH2	GO:0019752,carboxylic acid metabolic process|GO:0044249,cellular biosynthetic process|GO:0006807,nitrogen compound metabolic process|GO:0044281,small molecule metabolic process|GO:0044283,small molecule biosynthetic process|GO:0009069,serine family amino acid metabolic process|GO:0044699,single-organism process|GO:1901576,organic substance biosynthetic process|GO:0044710,single-organism metabolic…	GO:0005737,cytoplasm|GO:0009536,plastid|GO:0043231,intracellular membrane-bounded organelle|GO:0044464,cell part|GO:0044444,cytoplasmic part|GO:0005623,cell|GO:0005622,intracellular|GO:0043229,intracellular organelle|GO:0044424,intracellular part|GO:0043227,membrane-bounded organelle|GO:0043226,organelle|GO:0009507,chloroplast	GO:0043168,anion binding|GO:0050662,coenzyme binding|GO:0016614,oxidoreductase activity, acting on CH-OH group of donors|GO:0016616,oxidoreductase activity, acting on the CH-OH group of donors, NAD or NADP as acceptor|GO:0043177,organic acid binding|GO:0051287,NAD binding|GO:0031406,carboxylic acid binding|GO:0000166,nucleotide binding|GO:0036094,small molecule binding|GO:0003824,catalytic activi…	ath00260,Glycine, serine and threonine metabolism|ath01100,Metabolic pathways|ath01200,Carbon metabolism|ath01230,Biosynthesis of amino acids	http://www.uniprot.org/uniprot/O04130	FALSE
191	PREDICTED: cysteine synthase	gi|743919520	54.8	17	2.57±0.83	P47998	OASA1	GO:0048589,developmental growth|GO:0048588,developmental cell growth|GO:0048468,cell development|GO:0009167,purine ribonucleoside monophosphate metabolic process|GO:0044281,small molecule metabolic process|GO:0044283,small molecule biosynthetic process|GO:0009698,phenylpropanoid metabolic process|GO:0009699,phenylpropanoid biosynthetic process|GO:0071840,cellular component organization or biogene…	GO:0048046,apoplast|GO:0042579,microbody|GO:0043229,intracellular organelle|GO:0071944,cell periphery|GO:0043227,membrane-bounded organelle|GO:0043226,organelle|GO:0005737,cytoplasm|GO:0009536,plastid|GO:0031090,organelle membrane|GO:0009532,plastid stroma|GO:0005773,vacuole|GO:0009570,chloroplast stroma|GO:0005634,nucleus|GO:0016020,membrane|GO:0005777,peroxisome|GO:0005774,vacuolar membrane|GO:…	GO:0043168,anion binding|GO:0016835,carbon-oxygen lyase activity|GO:0016829,lyase activity|GO:0004124,cysteine synthase activity|GO:0043167,ion binding|GO:0003824,catalytic activity|GO:0016740,transferase activity|GO:0048037,cofactor binding|GO:0030170,pyridoxal phosphate binding|GO:0005515,protein binding|GO:0097159,organic cyclic compound binding|GO:1901363,heterocyclic compound binding|GO:0005…	ath00270,Cysteine and methionine metabolism|ath01230,Biosynthesis of amino acids|ath01200,Carbon metabolism|ath00920,Sulfur metabolism|ath01110,Biosynthesis of secondary metabolites|ath01100,Metabolic pathways	http://www.uniprot.org/uniprot/P47998	FALSE
	Metabolism; Biosynthesis of other secondary metabolites
1340	cinnamyl alcohol dehydrogenase	gi|9998899	5.9	1	3.34±0.62	P48523	CAD4	GO:0044249,cellular biosynthetic process|GO:1901362,organic cyclic compound biosynthetic process|GO:0009699,phenylpropanoid biosynthetic process|GO:1901360,organic cyclic compound metabolic process|GO:1901576,organic substance biosynthetic process|GO:0044710,single-organism metabolic process|GO:0044711,single-organism biosynthetic process|GO:0009809,lignin biosynthetic process|GO:0009808,lignin m…		GO:0005488,binding|GO:0043169,cation binding|GO:0016614,oxidoreductase activity, acting on CH-OH group of donors|GO:0046914,transition metal ion binding|GO:0016616,oxidoreductase activity, acting on the CH-OH group of donors, NAD or NADP as acceptor|GO:0052747,sinapyl alcohol dehydrogenase activity|GO:0043167,ion binding|GO:0003824,catalytic activity|GO:0045551,cinnamyl-alcohol dehydrogenase acti…	ath00940,Phenylpropanoid biosynthesis|ath01100,Metabolic pathways|ath01110,Biosynthesis of secondary metabolites	http://www.uniprot.org/uniprot/P48523	FALSE
1068	phenylalanine ammonia-lyase family protein	gi|566176021	10.6	5	2.38±0.74	P35510	PAL1	GO:0080090,regulation of primary metabolic process|GO:0019222,regulation of metabolic process|GO:0009074,aromatic amino acid family catabolic process|GO:0009696,salicylic acid metabolic process|GO:0044281,small molecule metabolic process|GO:0044282,small molecule catabolic process|GO:0044283,small molecule biosynthetic process|GO:0009698,phenylpropanoid metabolic process|GO:0009699,phenylpropanoi…	GO:0005737,cytoplasm|GO:0044464,cell part|GO:0005623,cell|GO:0005622,intracellular|GO:0044424,intracellular part	GO:0016841,ammonia-lyase activity|GO:0016840,carbon-nitrogen lyase activity|GO:0016829,lyase activity|GO:0003824,catalytic activity|GO:0045548,phenylalanine ammonia-lyase activity|GO:0005488,binding|GO:0005515,protein binding	ath00940,Phenylpropanoid biosynthesis|ath01100,Metabolic pathways|ath00360,Phenylalanine metabolism|ath01110,Biosynthesis of secondary metabolites	http://www.uniprot.org/uniprot/P35510	FALSE
1523	class III peroxidase	gi|591403292	9	3	2.17±0.6	Q9LE15	PER4	GO:0044248,cellular catabolic process|GO:0042744,hydrogen peroxide catabolic process|GO:0042743,hydrogen peroxide metabolic process|GO:0036294,cellular response to decreased oxygen levels|GO:0070887,cellular response to chemical stimulus|GO:0001666,response to hypoxia|GO:0044699,single-organism process|GO:0044712,single-organism catabolic process|GO:0044710,single-organism metabolic process|GO:00…	GO:0005576,extracellular region	GO:0043169,cation binding|GO:0046872,metal ion binding|GO:0020037,heme binding|GO:0046906,tetrapyrrole binding|GO:0097159,organic cyclic compound binding|GO:0016209,antioxidant activity|GO:0043167,ion binding|GO:1901363,heterocyclic compound binding|GO:0003824,catalytic activity|GO:0005488,binding|GO:0016684,oxidoreductase activity, acting on peroxide as acceptor|GO:0004601,peroxidase activity|GO…	ath00940,Phenylpropanoid biosynthesis|ath01100,Metabolic pathways|ath01110,Biosynthesis of secondary metabolites	http://www.uniprot.org/uniprot/Q9LE15	FALSE
450	PREDICTED: peroxidase 12-like	gi|743899195	14.4	6	4.27±0.28	Q96520	PER12	GO:0048638,regulation of developmental growth|GO:0048466,androecium development|GO:0008152,metabolic process|GO:0048589,developmental growth|GO:0048443,stamen development|GO:0048569,post-embryonic organ development|GO:0009791,post-embryonic development|GO:0042744,hydrogen peroxide catabolic process|GO:0035266,meristem growth|GO:0050789,regulation of biological process|GO:0044699,single-organism p…	GO:0043229,intracellular organelle|GO:0071944,cell periphery|GO:0043227,membrane-bounded organelle|GO:0043226,organelle|GO:0030054,cell junction|GO:0005737,cytoplasm|GO:0005773,vacuole|GO:0016020,membrane|GO:0030312,external encapsulating structure|GO:0055044,symplast|GO:0005911,cell-cell junction|GO:0009505,plant-type cell wall|GO:0009506,plasmodesma|GO:0043231,intracellular membrane-bounded org…	GO:0043169,cation binding|GO:0046872,metal ion binding|GO:0020037,heme binding|GO:0046906,tetrapyrrole binding|GO:0097159,organic cyclic compound binding|GO:0016209,antioxidant activity|GO:0043167,ion binding|GO:1901363,heterocyclic compound binding|GO:0003824,catalytic activity|GO:0005488,binding|GO:0016684,oxidoreductase activity, acting on peroxide as acceptor|GO:0004601,peroxidase activity|GO…	ath00940,Phenylpropanoid biosynthesis|ath01100,Metabolic pathways|ath01110,Biosynthesis of secondary metabolites	http://www.uniprot.org/uniprot/Q96520	FALSE
	Metabolism; Carbohydrate metabolism
601	hypothetical protein POPTR_0012s10830g	gi|224122176	8.3	6	2.85±0.4	Q8LPJ3	At5g13980	GO:0022607,cellular component assembly|GO:0070271,protein complex biogenesis|GO:0043933,macromolecular complex subunit organization|GO:0034622,cellular macromolecular complex assembly|GO:0019752,carboxylic acid metabolic process|GO:1901564,organonitrogen compound metabolic process|GO:0044723,single-organism carbohydrate metabolic process|GO:0006807,nitrogen compound metabolic process|GO:0000226,m…	GO:0048046,apoplast|GO:0043229,intracellular organelle|GO:0071944,cell periphery|GO:0043227,membrane-bounded organelle|GO:0043226,organelle|GO:0005737,cytoplasm|GO:0031090,organelle membrane|GO:0005773,vacuole|GO:0098805,whole membrane|GO:0016020,membrane|GO:0005774,vacuolar membrane|GO:0044437,vacuolar part|GO:0098588,bounding membrane of organelle|GO:0030312,external encapsulating structure|GO:…	GO:0016787,hydrolase activity|GO:0015923,mannosidase activity|GO:0046914,transition metal ion binding|GO:0043169,cation binding|GO:0043167,ion binding|GO:0016798,hydrolase activity, acting on glycosyl bonds|GO:0030246,carbohydrate binding|GO:0003824,catalytic activity|GO:0008270,zinc ion binding|GO:0004553,hydrolase activity, hydrolyzing O-glycosyl compounds|GO:0046872,metal ion binding|GO:000455…	ath00511,Other glycan degradation	http://www.uniprot.org/uniprot/Q8LPJ3	FALSE
972	hypothetical protein POPTR_0006s05130g	gi|566174566	5.1	1	4.76±2.07	Q94A08	RFS2	GO:0009311,oligosaccharide metabolic process|GO:0009313,oligosaccharide catabolic process|GO:0034484,raffinose catabolic process|GO:0044699,single-organism process|GO:0044712,single-organism catabolic process|GO:0044710,single-organism metabolic process|GO:0071704,organic substance metabolic process|GO:0080167,response to karrikin|GO:0044238,primary metabolic process|GO:1901575,organic substance …	GO:0055044,symplast|GO:0030054,cell junction|GO:0005911,cell-cell junction|GO:0009506,plasmodesma	GO:0047274,galactinol-sucrose galactosyltransferase activity|GO:0016787,hydrolase activity|GO:0052692,raffinose alpha-galactosidase activity|GO:0015925,galactosidase activity|GO:0016798,hydrolase activity, acting on glycosyl bonds|GO:0003824,catalytic activity|GO:0016740,transferase activity|GO:0004557,alpha-galactosidase activity|GO:0008378,galactosyltransferase activity|GO:0016757,transferase a…	ath00052,Galactose metabolism	http://www.uniprot.org/uniprot/Q94A08	FALSE
389	hypothetical protein POPTR_0010s15200g	gi|566190935	21.4	6	2.84±1.48	A8MS68	LPD1	GO:0006637,acyl-CoA metabolic process|GO:0006732,coenzyme metabolic process|GO:0019752,carboxylic acid metabolic process|GO:0042592,homeostatic process|GO:0044249,cellular biosynthetic process|GO:0042744,hydrogen peroxide catabolic process|GO:0009108,coenzyme biosynthetic process|GO:0044281,small molecule metabolic process|GO:0006090,pyruvate metabolic process|GO:0050789,regulation of biological …	GO:0031974,membrane-enclosed lumen|GO:0031975,envelope|GO:0043229,intracellular organelle|GO:0043228,non-membrane-bounded organelle|GO:0043227,membrane-bounded organelle|GO:0043226,organelle|GO:0005737,cytoplasm|GO:0009941,chloroplast envelope|GO:0009536,plastid|GO:0031981,nuclear lumen|GO:0005730,nucleolus|GO:0009570,chloroplast stroma|GO:0005634,nucleus|GO:0044435,plastid part|GO:0044434,chloro…	GO:0043168,anion binding|GO:0050662,coenzyme binding|GO:0050660,flavin adenine dinucleotide binding|GO:0005488,binding|GO:0097159,organic cyclic compound binding|GO:0000166,nucleotide binding|GO:0036094,small molecule binding|GO:0003824,catalytic activity|GO:0048037,cofactor binding|GO:0016651,oxidoreductase activity, acting on NAD(P)H|GO:0016667,oxidoreductase activity, acting on a sulfur group …	ath00630,Glyoxylate and dicarboxylate metabolism|ath00620,Pyruvate metabolism|ath00020,Citrate cycle (TCA cycle)|ath00260,Glycine, serine and threonine metabolism|ath00010,Glycolysis / Gluconeogenesis|ath00640,Propanoate metabolism|ath01200,Carbon metabolism|ath01110,Biosynthesis of secondary metabolites|ath01100,Metabolic pathways|ath00280,Valine, leucine and isoleucine degradation	http://www.uniprot.org/uniprot/A8MS68	FALSE
791	hypothetical protein POPTR_0018s12670g	gi|566215537	9.7	3	2.09±0.68	Q8RX87	RFS6	GO:0044238,primary metabolic process|GO:0005975,carbohydrate metabolic process|GO:0008152,metabolic process|GO:0071704,organic substance metabolic process		GO:0047274,galactinol-sucrose galactosyltransferase activity|GO:0003824,catalytic activity|GO:0016740,transferase activity|GO:0008378,galactosyltransferase activity|GO:0016757,transferase activity, transferring glycosyl groups|GO:0016758,transferase activity, transferring hexosyl groups	ath00052,Galactose metabolism	http://www.uniprot.org/uniprot/Q8RX87	FALSE
210	PREDICTED: uncharacterized protein LOC105123107	gi|743819545	34.4	11	2.03±0.56	Q9LYR4	T22N19_70	GO:0009167,purine ribonucleoside monophosphate metabolic process|GO:0044281,small molecule metabolic process|GO:0009161,ribonucleoside monophosphate metabolic process|GO:0009698,phenylpropanoid metabolic process|GO:0009699,phenylpropanoid biosynthetic process|GO:1901360,organic cyclic compound metabolic process|GO:0044712,single-organism catabolic process|GO:0044710,single-organism metabolic proc…	GO:0005737,cytoplasm|GO:0009536,plastid|GO:0043231,intracellular membrane-bounded organelle|GO:0009532,plastid stroma|GO:0009570,chloroplast stroma|GO:0005829,cytosol|GO:0044464,cell part|GO:0044444,cytoplasmic part|GO:0005739,mitochondrion|GO:0005622,intracellular|GO:0044446,intracellular organelle part|GO:0043229,intracellular organelle|GO:0005623,cell|GO:0044435,plastid part|GO:0044434,chlorop…	GO:0003824,catalytic activity|GO:0016740,transferase activity|GO:0004801,sedoheptulose-7-phosphate:D-glyceraldehyde-3-phosphate glyceronetransferase activity|GO:0016744,transferase activity, transferring aldehyde or ketonic groups	ath00030,Pentose phosphate pathway|ath01230,Biosynthesis of amino acids|ath01100,Metabolic pathways|ath01200,Carbon metabolism|ath01110,Biosynthesis of secondary metabolites	http://www.uniprot.org/uniprot/Q9LYR4	FALSE
962	PREDICTED: monodehydroascorbate reductase, chloroplastic	gi|743852770	23.9	10	2±0.1	P92947	At1g63940	GO:0008152,metabolic process|GO:0044248,cellular catabolic process|GO:0042744,hydrogen peroxide catabolic process|GO:0042743,hydrogen peroxide metabolic process|GO:0044699,single-organism process|GO:0044712,single-organism catabolic process|GO:0044710,single-organism metabolic process|GO:0046686,response to cadmium ion|GO:0009987,cellular process|GO:0072593,reactive oxygen species metabolic proce…	GO:0031975,envelope|GO:0043229,intracellular organelle|GO:0043227,membrane-bounded organelle|GO:0043226,organelle|GO:0005737,cytoplasm|GO:0009536,plastid|GO:0009532,plastid stroma|GO:0009570,chloroplast stroma|GO:0010319,stromule|GO:0005739,mitochondrion|GO:0044435,plastid part|GO:0044434,chloroplast part|GO:0031967,organelle envelope|GO:0009507,chloroplast|GO:0009526,plastid envelope|GO:0043231,…	GO:0035639,purine ribonucleoside triphosphate binding|GO:0005488,binding|GO:0000166,nucleotide binding|GO:1901363,heterocyclic compound binding|GO:1901265,nucleoside phosphate binding|GO:0001882,nucleoside binding|GO:0043168,anion binding|GO:0050662,coenzyme binding|GO:0050660,flavin adenine dinucleotide binding|GO:0043167,ion binding|GO:0001883,purine nucleoside binding|GO:0032549,ribonucleoside…	ath00053,Ascorbate and aldarate metabolism|ath01100,Metabolic pathways	http://www.uniprot.org/uniprot/P92947	FALSE
1495	PREDICTED: ribokinase-like	gi|743853526	9	2	2±1.81	A1A6H3	At1g17160	GO:0019321,pentose metabolic process|GO:0044238,primary metabolic process|GO:0044710,single-organism metabolic process|GO:0009987,cellular process|GO:0044262,cellular carbohydrate metabolic process|GO:0005996,monosaccharide metabolic process|GO:0006793,phosphorus metabolic process|GO:0016310,phosphorylation|GO:0044237,cellular metabolic process|GO:0046835,carbohydrate phosphorylation|GO:0071704,o…	GO:0005737,cytoplasm|GO:0009536,plastid|GO:0043231,intracellular membrane-bounded organelle|GO:0009532,plastid stroma|GO:0009570,chloroplast stroma|GO:0044464,cell part|GO:0044444,cytoplasmic part|GO:0005623,cell|GO:0005622,intracellular|GO:0044446,intracellular organelle part|GO:0043229,intracellular organelle|GO:0044435,plastid part|GO:0044434,chloroplast part|GO:0044424,intracellular part|GO:0…	GO:0019200,carbohydrate kinase activity|GO:0016773,phosphotransferase activity, alcohol group as acceptor|GO:0016772,transferase activity, transferring phosphorus-containing groups|GO:0016301,kinase activity|GO:0003824,catalytic activity|GO:0016740,transferase activity|GO:0004747,ribokinase activity	ath00030,Pentose phosphate pathway|ath01100,Metabolic pathways	http://www.uniprot.org/uniprot/A1A6H3	FALSE
574	PREDICTED: granule-bound starch synthase 1, chloroplastic/amyloplastic-like isoform X2	gi|743886988	14.8	4	2.24±0.3	Q9MAC8	SS2	GO:0050896,response to stimulus|GO:0044237,cellular metabolic process|GO:0046173,polyol biosynthetic process|GO:0019751,polyol metabolic process|GO:0044249,cellular biosynthetic process|GO:0009250,glucan biosynthetic process|GO:0044281,small molecule metabolic process|GO:0034645,cellular macromolecule biosynthetic process|GO:0044283,small molecule biosynthetic process|GO:0016051,carbohydrate bios…	GO:0005737,cytoplasm|GO:0009536,plastid|GO:0043231,intracellular membrane-bounded organelle|GO:0044464,cell part|GO:0044444,cytoplasmic part|GO:0005623,cell|GO:0005622,intracellular|GO:0043229,intracellular organelle|GO:0044424,intracellular part|GO:0009501,amyloplast|GO:0043227,membrane-bounded organelle|GO:0043226,organelle|GO:0009507,chloroplast	GO:0004373,glycogen (starch) synthase activity|GO:0035251,UDP-glucosyltransferase activity|GO:0046527,glucosyltransferase activity|GO:0003824,catalytic activity|GO:0016740,transferase activity|GO:0016757,transferase activity, transferring glycosyl groups|GO:0009011,starch synthase activity|GO:0016758,transferase activity, transferring hexosyl groups|GO:0008194,UDP-glycosyltransferase activity	ath00500,Starch and sucrose metabolism|ath01100,Metabolic pathways|ath01110,Biosynthesis of secondary metabolites	http://www.uniprot.org/uniprot/Q9MAC8	FALSE
205	PREDICTED: probable fructose-bisphosphate aldolase 3, chloroplastic	gi|743889355	47.3	15	3.25±1.48	Q9ZU52	FBA3	GO:0009167,purine ribonucleoside monophosphate metabolic process|GO:0044281,small molecule metabolic process|GO:0009161,ribonucleoside monophosphate metabolic process|GO:1901360,organic cyclic compound metabolic process|GO:0044712,single-organism catabolic process|GO:0044710,single-organism metabolic process|GO:0010035,response to inorganic substance|GO:0009199,ribonucleoside triphosphate metabol…	GO:0031976,plastid thylakoid|GO:0043229,intracellular organelle|GO:0043227,membrane-bounded organelle|GO:0043226,organelle|GO:0009579,thylakoid|GO:0009534,chloroplast thylakoid|GO:0031984,organelle subcompartment|GO:0009532,plastid stroma|GO:0009570,chloroplast stroma|GO:0005739,mitochondrion|GO:0044435,plastid part|GO:0044434,chloroplast part|GO:0005737,cytoplasm|GO:0010287,plastoglobule|GO:0009…	GO:0016829,lyase activity|GO:0016830,carbon-carbon lyase activity|GO:0016832,aldehyde-lyase activity|GO:0003824,catalytic activity|GO:0004332,fructose-bisphosphate aldolase activity	ath00030,Pentose phosphate pathway|ath00710,Carbon fixation in photosynthetic organisms|ath00010,Glycolysis / Gluconeogenesis|ath00051,Fructose and mannose metabolism|ath01230,Biosynthesis of amino acids|ath01200,Carbon metabolism|ath01110,Biosynthesis of secondary metabolites|ath01100,Metabolic pathways	http://www.uniprot.org/uniprot/Q9ZU52	FALSE
1473	PREDICTED: nitronate monooxygenase	gi|743899657	9.6	1	10.33±7.96	Q24JJ8	GLO3	GO:0006950,response to stress|GO:0048584,positive regulation of response to stimulus|GO:0048583,regulation of response to stimulus|GO:0031349,positive regulation of defense response|GO:0044249,cellular biosynthetic process|GO:0023052,signaling|GO:0007165,signal transduction|GO:0050789,regulation of biological process|GO:0031347,regulation of defense response|GO:0044710,single-organism metabolic p…	GO:0005737,cytoplasm|GO:0043231,intracellular membrane-bounded organelle|GO:0044464,cell part|GO:0005777,peroxisome|GO:0044444,cytoplasmic part|GO:0005623,cell|GO:0005622,intracellular|GO:0042579,microbody|GO:0043229,intracellular organelle|GO:0044424,intracellular part|GO:0043227,membrane-bounded organelle|GO:0043226,organelle	GO:0003973,(S)-2-hydroxy-acid oxidase activity|GO:0005488,binding|GO:0000166,nucleotide binding|GO:1901363,heterocyclic compound binding|GO:1901265,nucleoside phosphate binding|GO:0016491,oxidoreductase activity|GO:0043168,anion binding|GO:0050662,coenzyme binding|GO:0052854,medium-chain-(S)-2-hydroxy-acid oxidase activity|GO:0052852,very-long-chain-(S)-2-hydroxy-acid oxidase activity|GO:0052853,…	ath00630,Glyoxylate and dicarboxylate metabolism|ath04146,Peroxisome|ath01110,Biosynthesis of secondary metabolites|ath01100,Metabolic pathways|ath01200,Carbon metabolism	http://www.uniprot.org/uniprot/Q24JJ8	FALSE
541	PREDICTED: uncharacterized aarF domain-containing protein kinase At5g05200, chloroplastic	gi|743911577	23.9	9	2.73±0.46	Q9ASX5	At5g05200	GO:0009893,positive regulation of metabolic process|GO:0019222,regulation of metabolic process|GO:0015994,chlorophyll metabolic process|GO:0006787,porphyrin-containing compound catabolic process|GO:0009311,oligosaccharide metabolic process|GO:1901575,organic substance catabolic process|GO:0006778,porphyrin-containing compound metabolic process|GO:1901564,organonitrogen compound metabolic process|…	GO:0005737,cytoplasm|GO:0009536,plastid|GO:0043231,intracellular membrane-bounded organelle|GO:0009532,plastid stroma|GO:0009570,chloroplast stroma|GO:0010287,plastoglobule|GO:0044464,cell part|GO:0044444,cytoplasmic part|GO:0005623,cell|GO:0005622,intracellular|GO:0044446,intracellular organelle part|GO:0043229,intracellular organelle|GO:0044435,plastid part|GO:0044434,chloroplast part|GO:004442…	GO:0035639,purine ribonucleoside triphosphate binding|GO:0005488,binding|GO:0043167,ion binding|GO:1901363,heterocyclic compound binding|GO:1901265,nucleoside phosphate binding|GO:0001882,nucleoside binding|GO:0043168,anion binding|GO:0000166,nucleotide binding|GO:0016740,transferase activity|GO:0001883,purine nucleoside binding|GO:0032549,ribonucleoside binding|GO:0017076,purine nucleotide bindi…		http://www.uniprot.org/uniprot/Q9ASX5	FALSE
402	PREDICTED: probable aldo-keto reductase 2	gi|743912326	40.9	6	2.11±0.71	Q93ZN2	At1g60710	GO:0080090,regulation of primary metabolic process|GO:0019222,regulation of metabolic process|GO:0009167,purine ribonucleoside monophosphate metabolic process|GO:0044281,small molecule metabolic process|GO:0009161,ribonucleoside monophosphate metabolic process|GO:0009698,phenylpropanoid metabolic process|GO:0009699,phenylpropanoid biosynthetic process|GO:1901360,organic cyclic compound metabolic …	GO:0005737,cytoplasm|GO:0005829,cytosol|GO:0044464,cell part|GO:0005623,cell|GO:0005622,intracellular|GO:0044444,cytoplasmic part|GO:0044424,intracellular part	GO:0003824,catalytic activity|GO:0016491,oxidoreductase activity		http://www.uniprot.org/uniprot/Q93ZN2	FALSE
72	PREDICTED: probable fructokinase-6, chloroplastic	gi|743917580	34.1	13	2.83±0.55	Q9C524	At1g66430	GO:0019321,pentose metabolic process|GO:0016310,phosphorylation|GO:0019752,carboxylic acid metabolic process|GO:0043436,oxoacid metabolic process|GO:0006807,nitrogen compound metabolic process|GO:0009250,glucan biosynthetic process|GO:0044281,small molecule metabolic process|GO:0034645,cellular macromolecule biosynthetic process|GO:0044283,small molecule biosynthetic process|GO:0009069,serine fam…	GO:0005737,cytoplasm|GO:0009536,plastid|GO:0043231,intracellular membrane-bounded organelle|GO:0009532,plastid stroma|GO:0009570,chloroplast stroma|GO:0044464,cell part|GO:0044444,cytoplasmic part|GO:0005623,cell|GO:0005622,intracellular|GO:0044446,intracellular organelle part|GO:0043229,intracellular organelle|GO:0044435,plastid part|GO:0044434,chloroplast part|GO:0044424,intracellular part|GO:0…	GO:0019200,carbohydrate kinase activity|GO:0035639,purine ribonucleoside triphosphate binding|GO:0008865,fructokinase activity|GO:0004396,hexokinase activity|GO:0005488,binding|GO:0043167,ion binding|GO:1901363,heterocyclic compound binding|GO:0001883,purine nucleoside binding|GO:0001882,nucleoside binding|GO:0043168,anion binding|GO:0000166,nucleotide binding|GO:0016740,transferase activity|GO:1…	ath00051,Fructose and mannose metabolism|ath00500,Starch and sucrose metabolism|ath00520,Amino sugar and nucleotide sugar metabolism|ath01100,Metabolic pathways	http://www.uniprot.org/uniprot/Q9C524	FALSE
224	PREDICTED: pyruvate dehydrogenase E1 component subunit alpha, mitochondrial-like	gi|743924958	13	9	3.1±0.27	P52901	E1 ALPHA	GO:0009185,ribonucleoside diphosphate metabolic process|GO:0010035,response to inorganic substance|GO:0010038,response to metal ion|GO:0006732,coenzyme metabolic process|GO:0009141,nucleoside triphosphate metabolic process|GO:0009144,purine nucleoside triphosphate metabolic process|GO:0019752,carboxylic acid metabolic process|GO:0044723,single-organism carbohydrate metabolic process|GO:0034641,ce…	GO:0005737,cytoplasm|GO:0005829,cytosol|GO:0043231,intracellular membrane-bounded organelle|GO:0043233,organelle lumen|GO:0005634,nucleus|GO:0044464,cell part|GO:0044444,cytoplasmic part|GO:0031974,membrane-enclosed lumen|GO:0005622,intracellular|GO:0044446,intracellular organelle part|GO:0070013,intracellular organelle lumen|GO:0043229,intracellular organelle|GO:0005739,mitochondrion|GO:0044429,…	GO:0004738,pyruvate dehydrogenase activity|GO:0004739,pyruvate dehydrogenase (acetyl-transferring) activity|GO:0016624,oxidoreductase activity, acting on the aldehyde or oxo group of donors, disulfide as acceptor|GO:0003824,catalytic activity|GO:0016903,oxidoreductase activity, acting on the aldehyde or oxo group of donors|GO:0016491,oxidoreductase activity	ath00620,Pyruvate metabolism|ath00020,Citrate cycle (TCA cycle)|ath00010,Glycolysis / Gluconeogenesis|ath01200,Carbon metabolism|ath01110,Biosynthesis of secondary metabolites|ath01100,Metabolic pathways	http://www.uniprot.org/uniprot/P52901	FALSE
310	PREDICTED: NADP-dependent malic enzyme	gi|743925951	28.3	13	2.58±0.5	Q9CA83	NADP-ME4	GO:0006633,fatty acid biosynthetic process|GO:0006631,fatty acid metabolic process|GO:0022607,cellular component assembly|GO:0051289,protein homotetramerization|GO:0043933,macromolecular complex subunit organization|GO:0046364,monosaccharide biosynthetic process|GO:0019752,carboxylic acid metabolic process|GO:0044248,cellular catabolic process|GO:0043436,oxoacid metabolic process|GO:0044281,small…	GO:0005737,cytoplasm|GO:0009536,plastid|GO:0043231,intracellular membrane-bounded organelle|GO:0044464,cell part|GO:0044444,cytoplasmic part|GO:0005623,cell|GO:0005622,intracellular|GO:0043229,intracellular organelle|GO:0044424,intracellular part|GO:0043227,membrane-bounded organelle|GO:0043226,organelle|GO:0009507,chloroplast	GO:0004470,malic enzyme activity|GO:0051287,NAD binding|GO:0008948,oxaloacetate decarboxylase activity|GO:0008270,zinc ion binding|GO:0043167,ion binding|GO:1901363,heterocyclic compound binding|GO:1901265,nucleoside phosphate binding|GO:0016491,oxidoreductase activity|GO:0043169,cation binding|GO:0046914,transition metal ion binding|GO:0016829,lyase activity|GO:0000166,nucleotide binding|GO:0046…	ath00620,Pyruvate metabolism|ath00710,Carbon fixation in photosynthetic organisms|ath01100,Metabolic pathways|ath01200,Carbon metabolism	http://www.uniprot.org/uniprot/Q9CA83	FALSE
1115	PREDICTED: probable pectinesterase/pectinesterase inhibitor 51	gi|743926771	3.4	1	2.51±0.31	Q9FJ21	PME58	GO:0009892,negative regulation of metabolic process|GO:0019222,regulation of metabolic process|GO:0010393,galacturonan metabolic process|GO:0045229,external encapsulating structure organization|GO:0050789,regulation of biological process|GO:0071840,cellular component organization or biogenesis|GO:1901575,organic substance catabolic process|GO:0071555,cell wall organization|GO:0016043,cellular com…	GO:0005618,cell wall|GO:0044464,cell part|GO:0071944,cell periphery|GO:0005623,cell|GO:0030312,external encapsulating structure|GO:0005576,extracellular region	GO:0016787,hydrolase activity|GO:0030234,enzyme regulator activity|GO:0052689,carboxylic ester hydrolase activity|GO:0016788,hydrolase activity, acting on ester bonds|GO:0003824,catalytic activity|GO:0030599,pectinesterase activity|GO:0045330,aspartyl esterase activity|GO:0004857,enzyme inhibitor activity|GO:0098772,molecular function regulator	ath00500,Starch and sucrose metabolism|ath00040,Pentose and glucuronate interconversions|ath01100,Metabolic pathways	http://www.uniprot.org/uniprot/Q9FJ21	FALSE
1213	PREDICTED: hevamine-A-like	gi|743932656	7.8	2	3.17±0.35	P19172	CHIB1	GO:0046348,amino sugar catabolic process|GO:0009409,response to cold|GO:0044707,single-multicellular organism process|GO:0051716,cellular response to stimulus|GO:0070647,protein modification by small protein conjugation or removal|GO:0009611,response to wounding|GO:0018193,peptidyl-amino acid modification|GO:0048731,system development|GO:0003006,developmental process involved in reproduction|GO:0…	GO:0005576,extracellular region|GO:0005615,extracellular space|GO:0044421,extracellular region part	GO:0016787,hydrolase activity|GO:0008843,endochitinase activity|GO:0016798,hydrolase activity, acting on glycosyl bonds|GO:0003824,catalytic activity|GO:0004553,hydrolase activity, hydrolyzing O-glycosyl compounds|GO:0004568,chitinase activity	ath00520,Amino sugar and nucleotide sugar metabolism|ath01100,Metabolic pathways	http://www.uniprot.org/uniprot/P19172	FALSE
	Metabolism; Energy metabolism
173	Photosystem II 22 kDa family protein	gi|224063082	36.8	50	2.53±0.32	Q9XF91	PSBS	GO:0019222,regulation of metabolic process|GO:0061024,membrane organization|GO:0044281,small molecule metabolic process|GO:0044283,small molecule biosynthetic process|GO:0015979,photosynthesis|GO:0071840,cellular component organization or biogenesis|GO:0044710,single-organism metabolic process|GO:0044711,single-organism biosynthetic process|GO:0044093,positive regulation of molecular function|GO:…	GO:0055035,plastid thylakoid membrane|GO:0034357,photosynthetic membrane|GO:0031976,plastid thylakoid|GO:0043229,intracellular organelle|GO:0009517,PSII associated light-harvesting complex II|GO:0030076,light-harvesting complex|GO:0005622,intracellular|GO:0043227,membrane-bounded organelle|GO:0043226,organelle|GO:0031224,intrinsic component of membrane|GO:0009535,chloroplast thylakoid membrane|GO…	GO:0016168,chlorophyll binding|GO:0031409,pigment binding|GO:0046906,tetrapyrrole binding|GO:0097159,organic cyclic compound binding|GO:0051738,xanthophyll binding|GO:0019840,isoprenoid binding|GO:0008289,lipid binding|GO:0005488,binding|GO:1901363,heterocyclic compound binding	ath00195,Photosynthesis|ath01100,Metabolic pathways	http://www.uniprot.org/uniprot/Q9XF91	FALSE
29	PREDICTED: V-type proton ATPase subunit B 2 isoform X2	gi|743792934	58.2	34	2.08±0.61	Q9SZN1	VHA-B2	GO:1902600,hydrogen ion transmembrane transport|GO:0009141,nucleoside triphosphate metabolic process|GO:0009144,purine nucleoside triphosphate metabolic process|GO:0009167,purine ribonucleoside monophosphate metabolic process|GO:0034641,cellular nitrogen compound metabolic process|GO:0006807,nitrogen compound metabolic process|GO:0044281,small molecule metabolic process|GO:0009161,ribonucleoside …	GO:0043229,intracellular organelle|GO:0043227,membrane-bounded organelle|GO:0043226,organelle|GO:0005737,cytoplasm|GO:0044446,intracellular organelle part|GO:0031090,organelle membrane|GO:0005773,vacuole|GO:0098805,whole membrane|GO:0016020,membrane|GO:0005774,vacuolar membrane|GO:0033180,proton-transporting V-type ATPase, V1 domain|GO:0044437,vacuolar part|GO:0098588,bounding membrane of organel…	GO:0035639,purine ribonucleoside triphosphate binding|GO:0005488,binding|GO:0043167,ion binding|GO:1901363,heterocyclic compound binding|GO:1901265,nucleoside phosphate binding|GO:0001882,nucleoside binding|GO:0043168,anion binding|GO:0016820,hydrolase activity, acting on acid anhydrides, catalyzing transmembrane movement of substances|GO:0000166,nucleotide binding|GO:0001883,purine nucleoside bi…	ath00190,Oxidative phosphorylation|ath04145,Phagosome|ath01100,Metabolic pathways	http://www.uniprot.org/uniprot/Q9SZN1	FALSE
49	PREDICTED: plasma membrane ATPase 4-like	gi|743862321	25.6	15	2.22±0.97	Q9SJB3	AHA5	GO:0009167,purine ribonucleoside monophosphate metabolic process|GO:0009165,nucleotide biosynthetic process|GO:0009163,nucleoside biosynthetic process|GO:0009161,ribonucleoside monophosphate metabolic process|GO:1901362,organic cyclic compound biosynthetic process|GO:0042451,purine nucleoside biosynthetic process|GO:0009168,purine ribonucleoside monophosphate biosynthetic process|GO:0044710,singl…	GO:0044425,membrane part|GO:0016021,integral component of membrane|GO:0016020,membrane|GO:0031224,intrinsic component of membrane	GO:0035639,purine ribonucleoside triphosphate binding|GO:0036442,hydrogen-exporting ATPase activity|GO:0005488,binding|GO:0016887,ATPase activity|GO:0043167,ion binding|GO:1901363,heterocyclic compound binding|GO:0032550,purine ribonucleoside binding|GO:0001882,nucleoside binding|GO:0043168,anion binding|GO:0042625,ATPase activity, coupled to transmembrane movement of ions|GO:0042626,ATPase activ…	ath00190,Oxidative phosphorylation	http://www.uniprot.org/uniprot/Q9SJB3	FALSE
54	PREDICTED: ATP synthase subunit alpha, mitochondrial	gi|743900113	44.7	68	2.61±0.5	P92549	ATPA	GO:0009167,purine ribonucleoside monophosphate metabolic process|GO:0009165,nucleotide biosynthetic process|GO:0009163,nucleoside biosynthetic process|GO:0009161,ribonucleoside monophosphate metabolic process|GO:1901362,organic cyclic compound biosynthetic process|GO:0042451,purine nucleoside biosynthetic process|GO:0009168,purine ribonucleoside monophosphate biosynthetic process|GO:0044710,singl…	GO:0044464,cell part|GO:0031975,envelope|GO:0043229,intracellular organelle|GO:0043227,membrane-bounded organelle|GO:0043226,organelle|GO:0045261,proton-transporting ATP synthase complex, catalytic core F(1)|GO:0044446,intracellular organelle part|GO:0031090,organelle membrane|GO:0005743,mitochondrial inner membrane|GO:0016020,membrane|GO:0044444,cytoplasmic part|GO:0005739,mitochondrion|GO:00057…	GO:0035639,purine ribonucleoside triphosphate binding|GO:0036442,hydrogen-exporting ATPase activity|GO:0005488,binding|GO:0016887,ATPase activity|GO:0043167,ion binding|GO:1901363,heterocyclic compound binding|GO:0032550,purine ribonucleoside binding|GO:0001882,nucleoside binding|GO:0043168,anion binding|GO:0042625,ATPase activity, coupled to transmembrane movement of ions|GO:0042626,ATPase activ…	ath00190,Oxidative phosphorylation|ath01100,Metabolic pathways	http://www.uniprot.org/uniprot/P92549	FALSE
328	PREDICTED: ATPase 10, plasma membrane-type-like	gi|743910280	21.6	11	3.13±0.7	Q43128	AHA10	GO:0009167,purine ribonucleoside monophosphate metabolic process|GO:0009165,nucleotide biosynthetic process|GO:0009163,nucleoside biosynthetic process|GO:0009161,ribonucleoside monophosphate metabolic process|GO:0098771,inorganic ion homeostasis|GO:0009698,phenylpropanoid metabolic process|GO:0009699,phenylpropanoid biosynthetic process|GO:0009168,purine ribonucleoside monophosphate biosynthetic …	GO:0000325,plant-type vacuole|GO:0043229,intracellular organelle|GO:0005622,intracellular|GO:0043227,membrane-bounded organelle|GO:0043226,organelle|GO:0031224,intrinsic component of membrane|GO:0005737,cytoplasm|GO:0009536,plastid|GO:0031090,organelle membrane|GO:0005773,vacuole|GO:0016021,integral component of membrane|GO:0016020,membrane|GO:0005774,vacuolar membrane|GO:0044437,vacuolar part|GO…	GO:0035639,purine ribonucleoside triphosphate binding|GO:0036442,hydrogen-exporting ATPase activity|GO:0005488,binding|GO:0016887,ATPase activity|GO:0043167,ion binding|GO:1901363,heterocyclic compound binding|GO:0032550,purine ribonucleoside binding|GO:0001882,nucleoside binding|GO:0043168,anion binding|GO:0042625,ATPase activity, coupled to transmembrane movement of ions|GO:0042626,ATPase activ…	ath00190,Oxidative phosphorylation	http://www.uniprot.org/uniprot/Q43128	FALSE
12	PREDICTED: ATP synthase subunit beta, mitochondrial-like	gi|743942926	68.5	136	2.02±0.47	P83483	At5g08670	GO:0009167,purine ribonucleoside monophosphate metabolic process|GO:0009165,nucleotide biosynthetic process|GO:0009163,nucleoside biosynthetic process|GO:0009161,ribonucleoside monophosphate metabolic process|GO:1901362,organic cyclic compound biosynthetic process|GO:0042451,purine nucleoside biosynthetic process|GO:0009168,purine ribonucleoside monophosphate biosynthetic process|GO:0044710,singl…	GO:0044464,cell part|GO:0031975,envelope|GO:0043229,intracellular organelle|GO:0043227,membrane-bounded organelle|GO:0043226,organelle|GO:0045261,proton-transporting ATP synthase complex, catalytic core F(1)|GO:0033178,proton-transporting two-sector ATPase complex, catalytic domain|GO:0031090,organelle membrane|GO:0098796,membrane protein complex|GO:0016020,membrane|GO:0044444,cytoplasmic part|GO…	GO:0035639,purine ribonucleoside triphosphate binding|GO:0005488,binding|GO:0016887,ATPase activity|GO:0043167,ion binding|GO:1901363,heterocyclic compound binding|GO:0032550,purine ribonucleoside binding|GO:0001882,nucleoside binding|GO:0043168,anion binding|GO:0042625,ATPase activity, coupled to transmembrane movement of ions|GO:0042626,ATPase activity, coupled to transmembrane movement of subs…	ath00190,Oxidative phosphorylation|ath01100,Metabolic pathways	http://www.uniprot.org/uniprot/P83483	FALSE
	Metabolism; Glycan biosynthesis and metabolism
345	UDP-glucose 4-epimerase family protein	gi|566148278	19.8	5	3.08±2.42	Q9SN58	UGE5	GO:0044238,primary metabolic process|GO:0044710,single-organism metabolic process|GO:0005975,carbohydrate metabolic process|GO:0071704,organic substance metabolic process|GO:0005996,monosaccharide metabolic process|GO:0019318,hexose metabolic process|GO:0006012,galactose metabolic process|GO:0008152,metabolic process|GO:0044723,single-organism carbohydrate metabolic process|GO:0044699,single-orga…		GO:0050662,coenzyme binding|GO:0016854,racemase and epimerase activity|GO:0016853,isomerase activity|GO:0016857,racemase and epimerase activity, acting on carbohydrates and derivatives|GO:0003824,catalytic activity|GO:0048037,cofactor binding|GO:0005488,binding|GO:0003978,UDP-glucose 4-epimerase activity	ath00052,Galactose metabolism|ath00520,Amino sugar and nucleotide sugar metabolism|ath01100,Metabolic pathways	http://www.uniprot.org/uniprot/Q9SN58	FALSE
	Metabolism; Lipid metabolism
218	PREDICTED: enoyl-[acyl-carrier-protein] reductase [NADH], chloroplastic-like [Populus euphratica]	gi|743886684	40.1	12	2.24±1.42	Q9SLA8	MOD1	GO:0006633,fatty acid biosynthetic process|GO:0006631,fatty acid metabolic process|GO:0009628,response to abiotic stimulus|GO:0016131,brassinosteroid metabolic process|GO:0051234,establishment of localization|GO:0016132,brassinosteroid biosynthetic process|GO:0006732,coenzyme metabolic process|GO:0051186,cofactor metabolic process|GO:0019752,carboxylic acid metabolic process|GO:0044249,cellular b…	GO:0031975,envelope|GO:0043229,intracellular organelle|GO:0005622,intracellular|GO:0043227,membrane-bounded organelle|GO:0043226,organelle|GO:0009579,thylakoid|GO:0009941,chloroplast envelope|GO:0009536,plastid|GO:0009532,plastid stroma|GO:0009570,chloroplast stroma|GO:0044435,plastid part|GO:0044434,chloroplast part|GO:0043234,protein complex|GO:0031967,organelle envelope|GO:0009507,chloroplast|…	GO:0005488,binding|GO:0043169,cation binding|GO:0046872,metal ion binding|GO:0016628,oxidoreductase activity, acting on the CH-CH group of donors, NAD or NADP as acceptor|GO:0046914,transition metal ion binding|GO:0043167,ion binding|GO:0016627,oxidoreductase activity, acting on the CH-CH group of donors|GO:0016631,enoyl-[acyl-carrier-protein] reductase activity|GO:0004312,fatty acid synthase act…	ath00061,Fatty acid biosynthesis|ath00780,Biotin metabolism|ath01212,Fatty acid metabolism|ath01100,Metabolic pathways	http://www.uniprot.org/uniprot/Q9SLA8	FALSE
	Metabolism; Metabolism of cofactors and vitamins
1061	serine/threonine protein phosphatase 2A regulatory subunit B'	gi|224141269	5.3	1	7.77±6	Q8LF36	B'THETA	GO:0019220,regulation of phosphate metabolic process|GO:0080090,regulation of primary metabolic process|GO:0019222,regulation of metabolic process|GO:0016311,dephosphorylation|GO:0010921,regulation of phosphatase activity|GO:0031323,regulation of cellular metabolic process|GO:0034047,regulation of protein phosphatase type 2A activity|GO:0023052,signaling|GO:0007165,signal transduction|GO:0050789,…	GO:0043234,protein complex|GO:0005737,cytoplasm|GO:0008287,protein serine/threonine phosphatase complex|GO:0032991,macromolecular complex|GO:0043231,intracellular membrane-bounded organelle|GO:0044464,cell part|GO:1903293,phosphatase complex|GO:0005777,peroxisome|GO:0044444,cytoplasmic part|GO:1902494,catalytic complex|GO:0005622,intracellular|GO:0042579,microbody|GO:0043229,intracellular organel…	GO:0019888,protein phosphatase regulator activity|GO:0019208,phosphatase regulator activity|GO:0008601,protein phosphatase type 2A regulator activity|GO:0098772,molecular function regulator|GO:0030234,enzyme regulator activity	ath03015,mRNA surveillance pathway	http://www.uniprot.org/uniprot/Q8LF36	FALSE
	Metabolic pathways
[truncated: 203 more rows]
