# Supplementary material for: The photo-inhibition of camphor leaves (Cinnamomum camphora L.) by NaCl stress based on physiological, chloroplast structure and comparative proteomic analysis
Source: PeerJ. 2020 Aug 7;8:e9443. doi: 10.7717/peerj.9443 (PMC7486828; doi:10.7717/peerj.9443)
Supplement: Table S2 [file peerj-08-9443-s004.xlsx]

## Sheet: Sheet1
Table. S2 The analysis of the proteins enriched in photosynthesis process
Primary	Protein	genename	mean ratio (±SD)	cellular location	Biological process	molecular function
protein ID	Name				effect	effect
photosynthesis
gi|224063082	Photosystem II 22 kDa family protein	PSBS	2.53±0.32	chloroplast	photosynthesis	chlorophyll binding
gi|675155242	ATP synthase CF1 beta subunit (chloroplast)	atpB	0.2±0.02	plastid thylakoid membrane	purine ribonucleoside monophosphate metabolic process	purine ribonucleoside triphosphate binding
gi|705245186	photosystem II protein D1 (chloroplast)	psbA	0.15±0.01	chloroplast	photosynthesis	chlorophyll binding
gi|705245189	ATP synthase CF1 alpha subunit (chloroplast)	atpA	0.23±0.02	chloroplast	organonitrogen compound metabolic process	hydrogen-exporting ATPase activity
gi|705245197	photosystem II protein D2 (chloroplast)	psbD	0.15±0.02	chloroplast	photosynthesis	chlorophyll binding
gi|705245198	photosystem II CP43 chlorophyll apoprotein (chloroplast)	psbC	0.09±0.01	chloroplast	photosynthesis	chlorophyll binding
gi|705245201	photosystem I P700 apoprotein A2 (chloroplast)	psaB	0.3±0.03	chloroplast	photosynthesis	chlorophyll binding
gi|705245218	photosystem II cytochrome b559 alpha subunit (chloroplast)	psbE	0.34±0.04	chloroplast	photosynthesis	tetrapyrrole binding
gi|705245225	PSII CP47 chlorophyll apoprotein	psbB	0.14±0.02	chloroplast	photosynthesis	chlorophyll binding
gi|705245229	cytochrome b6/f complex subunit IV (chloroplast)	petD	0.37±0.07	chloroplast	photosynthesis	electron transporter, (transferring electrons within the cyclic electron transport pathway of photosynthesis activity)
gi|705245249	photosystem I subunit VII (chloroplast)	psaC	0.24±0.02	chloroplast	photosynthesis	oxidoreductase activity
gi|743810316	PREDICTED: cytochrome b6	petB	0.19±0.04	chloroplast	photosynthesis	tetrapyrrole binding
gi|743821942	PREDICTED: photosystem I reaction center subunit II, chloroplastic-like	PSAD2	0.17±0.04	chloroplast	photosynthesis	Unknown
gi|743827102	PREDICTED: photosystem I reaction center subunit N, chloroplastic-like isoform X1	PSAN	0.32±0.08	chloroplast	photosynthesis	binding
gi|743833435	PREDICTED: photosystem I reaction center subunit IV A, chloroplastic-like	PSAE2	0.35±0.03	chloroplast	photosynthesis	Unknown
gi|743840443	PREDICTED: oxygen-evolving enhancer protein 2, chloroplastic-like	PSBP1	0.12±0.01	chloroplast	photosynthesis	ion binding
gi|743881832	PREDICTED: ATP synthase subunit b', chloroplastic-like	F10M6.100	0.4±0.22	chloroplast	photosynthesis	hydrogen ion transmembrane transporter activity
gi|743885735	PREDICTED: ATP synthase gamma chain, chloroplastic	ATPC1	0.41±0.07	chloroplast	photosynthesis	hydrogen-exporting ATPase activity
gi|743921083	PREDICTED: oxygen-evolving enhancer protein 1, chloroplastic	PSBO2	0.12±0.01	chloroplast	photosynthesis	ion binding
gi|743932458	PREDICTED: photosystem I reaction center subunit VI, chloroplastic-like [Populus euphratica]	PSAH2	0.14±0.02	chloroplast	photosynthesis	Unknown
gi|743936171	PREDICTED: oxygen-evolving enhancer protein 3-2, chloroplastic-like	PSBQ2	0.15±0.03	chloroplast	photosynthesis	ion binding
gi|743941642	PREDICTED: photosystem I reaction center subunit XI, chloroplastic-like	PSAL	0.18±0.04	chloroplast	photosynthesis	binding
Photosynthesis - antenna proteins
gi|224131818	chlorophyll a/b-binding family protein	LHCB2.1	0.15±0.04	plastid thylakoid	generation of precursor metabolites and energy	chlorophyll binding
gi|224140409	chlorophyll a/b binding protein CP29	LHCB4.2	0.23±0.07	plastid thylakoid	regulation of phosphate metabolic process	chlorophyll binding
gi|566154166	LIGHT-HARVESTING CHLOROPHYLL BINDING protein 3	LHCB3*1	0.31±0.13	plastid thylakoid	primary metabolic process	chlorophyll binding
gi|566238007	Chlorophyll a-b binding protein CP26	LHCB5	0.12±0.01	plastid thylakoid	small molecule metabolic process	chlorophyll binding
gi|566158833	hypothetical protein POPTR_0002s19010g	Lhb1B1	0.08±0.02	plastid thylakoid	primary metabolic process	chlorophyll binding
gi|566206415	hypothetical protein POPTR_0015s07340g	LHCA4	0.34±0.06	plastid thylakoid	response to abiotic stimulus	chlorophyll binding
gi|743895424	PREDICTED: chlorophyll a-b binding protein 6, chloroplastic-like	LHCA1	0.39±0.17	plastid thylakoid	response to abiotic stimulus	chlorophyll binding
gi|743916300	PREDICTED: chlorophyll a-b binding protein 7, chloroplastic	Lhca2	0.27±0.03	plastid thylakoid	primary metabolic process	chlorophyll binding
gi|743928007	PREDICTED: chlorophyll a-b binding protein 8, chloroplastic	T25B24.12	0.26±0.1	plastid thylakoid	carboxylic acid metabolic process	chlorophyll binding
gi|743943809	PREDICTED: chlorophyll a-b binding protein of LHCII type 1-like	Lhb1B1	0.07±0.03	plastid thylakoid	primary metabolic process	chlorophyll binding
