# Supplementary material for: The photo-inhibition of camphor leaves (Cinnamomum camphora L.) by NaCl stress based on physiological, chloroplast structure and comparative proteomic analysis
Source: PeerJ. 2020 Aug 7;8:e9443. doi: 10.7717/peerj.9443 (PMC7486828; doi:10.7717/peerj.9443)
Supplement: Table S3 [file peerj-08-9443-s005.xlsx]

## Sheet: S3 submision
Table. S3 The analysis of the proteins effected in oxidative functions
Number	Protein Name	Primary protein ID	Mean ratio (±SD)	Uniprot	Genename	Biological Process	Cell Component	Molecular Function	KEGG Pathways	UNIPROT_URL
	energy derivation by oxidation of organic compounds
176	PREDICTED: malate dehydrogenase, glyoxysomal	gi|743822923	0.22±0.1	O82399	At2g22780	GO:0034440,lipid oxidation|GO:0009894,regulation of catabolic process|GO:0044238,primary metabolic process|GO:0080090,regulation of primary metabolic process|GO:0031329,regulation of cellular catabolic process|GO:0031326,regulation of cellular biosyntheti_x0000__x0000__x0000__x0000__x0000__x0000__x0000__x0000__x0000__x0000__x0000__x0000__x0000__x0000__x0000__x0000__x0000__x0000__x0000__x0000__x00…	GO:0005737,cytoplasm|GO:0009536,plastid|GO:0043231,intracellular membrane-bounded organelle|GO:0044464,cell part|GO:0005777,peroxisome|GO:0044444,cytoplasmic part|GO:0005623,cell|GO:0005622,intracellular|GO:0042579,microbody|GO:0043229,intracellular organ_x0000__x0000__x0000__x0000__x0000__x0000__x0000__x0000__x0000__x0000__x0000__x0000__x0000__x0000__x0000__x0000__x0000__x0000__x0000__x0000__x00…	GO:0016614,oxidoreductase activity, acting on CH-OH group of donors|GO:0016615,malate dehydrogenase activity|GO:0016616,oxidoreductase activity, acting on the CH-OH group of donors, NAD or NADP as acceptor|GO:0003824,catalytic activity|GO:0030060,L-malate_x0000_䏻_x0000_㾀￦⸒⸒⸒槡⸒槡_x0000__x0000__x0000__x0000__x0000__x0000__x0002__x0000__x0000__x0000__xFFFF__xFFFF__x0000__x0000__x0000__x0000__x0000…	ath00630,Glyoxylate and dicarboxylate metabolism|ath00620,Pyruvate metabolism|ath00020,Citrate cycle (TCA cycle)|ath00270,Cysteine and methionine metabolism|ath00710,Carbon fixation in photosynthetic organisms|ath01200,Carbon metabolism|ath01110,Biosynthe_x0000_䏻_x0000_㾀￦⸒⸒⸒槡⸒槡_x0000__x0000__x0000__x0000__x0000__x0000__x0002__x0000__x0000__x0000__xFFFF__xFFFF__x0000__x0000__x0000__x0000__x0000…	http://www.uniprot.org/uniprot/O82399
210	PREDICTED: uncharacterized protein LOC105123107	gi|743819545	2.03±0.56	Q9LYR4	T22N19_70	GO:0009167,purine ribonucleoside monophosphate metabolic process|GO:0044281,small molecule metabolic process|GO:0009161,ribonucleoside monophosphate metabolic process|GO:0009698,phenylpropanoid metabolic process|GO:0009699,phenylpropanoid biosynthetic process|GO:1901360,organic cyclic compound metabolic process|GO:0044712,single-organism catabolic process|GO:0044710,single-organism metabolic proc…	GO:0005737,cytoplasm|GO:0009536,plastid|GO:0043231,intracellular membrane-bounded organelle|GO:0009532,plastid stroma|GO:0009570,chloroplast stroma|GO:0005829,cytosol|GO:0044464,cell part|GO:0044444,cytoplasmic part|GO:0005739,mitochondrion|GO:0005622,intracellular|GO:0044446,intracellular organelle part|GO:0043229,intracellular organelle|GO:0005623,cell|GO:0044435,plastid part|GO:0044434,chlorop…	GO:0003824,catalytic activity|GO:0016740,transferase activity|GO:0004801,sedoheptulose-7-phosphate:D-glyceraldehyde-3-phosphate glyceronetransferase activity|GO:0016744,transferase activity, transferring aldehyde or ketonic groups	ath00030,Pentose phosphate pathway|ath01230,Biosynthesis of amino acids|ath01100,Metabolic pathways|ath01200,Carbon metabolism|ath01110,Biosynthesis of secondary metabolites	http://www.uniprot.org/uniprot/Q9LYR4
240	PREDICTED: citrate synthase, mitochondrial isoform X4	gi|743916626	3.61±0.77	P20115	CSY4	GO:0009185,ribonucleoside diphosphate metabolic process|GO:0010035,response to inorganic substance|GO:0010038,response to metal ion|GO:0006732,coenzyme metabolic process|GO:0009141,nucleoside triphosphate metabolic process|GO:0009144,purine nucleoside triphosphate metabolic process|GO:0019752,carboxylic acid metabolic process|GO:0043436,oxoacid metabolic process|GO:0006099,tricarboxylic acid cycl…	GO:0031974,membrane-enclosed lumen|GO:0043229,intracellular organelle|GO:0071944,cell periphery|GO:0043227,membrane-bounded organelle|GO:0043226,organelle|GO:0005737,cytoplasm|GO:0009536,plastid|GO:0005618,cell wall|GO:0005739,mitochondrion|GO:0005759,mitochondrial matrix|GO:0005794,Golgi apparatus|GO:0030312,external encapsulating structure|GO:0012505,endomembrane system|GO:0009507,chloroplast|G…	GO:0035639,purine ribonucleoside triphosphate binding|GO:0036440,citrate synthase activity|GO:0008270,zinc ion binding|GO:0043167,ion binding|GO:1901363,heterocyclic compound binding|GO:1901265,nucleoside phosphate binding|GO:0001882,nucleoside binding|GO:0046912,transferase activity, transferring acyl groups, acyl groups converted into alkyl on transfer|GO:0043169,cation binding|GO:0046914,trans…	ath00630,Glyoxylate and dicarboxylate metabolism|ath00020,Citrate cycle (TCA cycle)|ath01210,2-Oxocarboxylic acid metabolism|ath01230,Biosynthesis of amino acids|ath01200,Carbon metabolism|ath01110,Biosynthesis of secondary metabolites|ath01100,Metabolic pathways	http://www.uniprot.org/uniprot/P20115
253	PREDICTED: cytochrome b6	gi|743810316	0.19±0.04	P56773	petB	GO:0044710,single-organism metabolic process|GO:0015980,energy derivation by oxidation of organic compounds|GO:0009987,cellular process|GO:0044237,cellular metabolic process|GO:0022900,electron transport chain|GO:0045333,cellular respiration|GO:0044699,single-organism process|GO:0008152,metabolic process|GO:0022904,respiratory electron transport chain|GO:0044763,single-organism cellular process|G…	GO:0055035,plastid thylakoid membrane|GO:0034357,photosynthetic membrane|GO:0031976,plastid thylakoid|GO:0043229,intracellular organelle|GO:0005622,intracellular|GO:0043227,membrane-bounded organelle|GO:0043226,organelle|GO:0031224,intrinsic component of membrane|GO:0009535,chloroplast thylakoid membrane|GO:0009534,chloroplast thylakoid|GO:0031984,organelle subcompartment|GO:0016021,integral comp…	GO:0043169,cation binding|GO:0046914,transition metal ion binding|GO:0020037,heme binding|GO:0046906,tetrapyrrole binding|GO:0097159,organic cyclic compound binding|GO:0043167,ion binding|GO:0003824,catalytic activity|GO:0005488,binding|GO:0009055,electron carrier activity|GO:0045158,electron transporter, transferring electrons within cytochrome b6/f complex of photosystem II activity|GO:0005506,…	ath00195,Photosynthesis|ath01100,Metabolic pathways	http://www.uniprot.org/uniprot/P56773
297	PREDICTED: malate dehydrogenase, glyoxysomal	gi|743795553	0.2±0.05	O82399	At2g22780	GO:0034440,lipid oxidation|GO:0009894,regulation of catabolic process|GO:0044238,primary metabolic process|GO:0080090,regulation of primary metabolic process|GO:0031329,regulation of cellular catabolic process|GO:0031326,regulation of cellular biosyntheti_x0000__x0000__x0000__x0000__x0000__x0000__x0000__x0000__x0000__x0000__x0000__x0000__x0000__x0000__x0000__x0000__x0000__x0000__x0000__x0000__x00…	GO:0005737,cytoplasm|GO:0009536,plastid|GO:0043231,intracellular membrane-bounded organelle|GO:0044464,cell part|GO:0005777,peroxisome|GO:0044444,cytoplasmic part|GO:0005623,cell|GO:0005622,intracellular|GO:0042579,microbody|GO:0043229,intracellular organ_x0000__x0000__x0000__x0000__x0000__x0000__x0000__x0000__x0000__x0000__x0000__x0000__x0000__x0000__x0000__x0000__x0000__x0000__x0000__x0000__x00…	GO:0016614,oxidoreductase activity, acting on CH-OH group of donors|GO:0016615,malate dehydrogenase activity|GO:0016616,oxidoreductase activity, acting on the CH-OH group of donors, NAD or NADP as acceptor|GO:0003824,catalytic activity|GO:0030060,L-malate_x0000_䉀_x0000_㾀_xFFFF__xFFFF_⸒⸒⸒槡⸒槡_x0000__x0000__x0000__x0000__x0000__x0000__x0002__x0000__x0000__x0000__xFFFF__xFFFF__x0000_㨀 㽭_x0000_㨀_x00…	ath00630,Glyoxylate and dicarboxylate metabolism|ath00620,Pyruvate metabolism|ath00020,Citrate cycle (TCA cycle)|ath00270,Cysteine and methionine metabolism|ath00710,Carbon fixation in photosynthetic organisms|ath01200,Carbon metabolism|ath01110,Biosynthe耀䐽_x0000_㾀￦⸒⸒⸒槡⸒槡_x0000__x0000__x0000__x0000__x0000__x0000__x0002__x0000__x0000__x0000__xFFFF__xFFFF__x0000__x0000__x0000__x0000__x0000__x000…	http://www.uniprot.org/uniprot/O82399
452	PREDICTED: isocitrate dehydrogenase NADP	gi|743907790	0.47±0.07	Q8LPJ5	At5g14590	GO:0019752,carboxylic acid metabolic process|GO:0006099,tricarboxylic acid cycle|GO:0009060,aerobic respiration|GO:0044281,small molecule metabolic process|GO:0006091,generation of precursor metabolites and energy|GO:0072350,tricarboxylic acid metabolic process|GO:0044699,single-organism process|GO:0044710,single-organism metabolic process|GO:0071704,organic substance metabolic process|GO:0045333…	GO:0031976,plastid thylakoid|GO:0043229,intracellular organelle|GO:0043227,membrane-bounded organelle|GO:0043226,organelle|GO:0009579,thylakoid|GO:0009534,chloroplast thylakoid|GO:0031984,organelle subcompartment|GO:0009532,plastid stroma|GO:0009570,chloroplast stroma|GO:0005739,mitochondrion|GO:0044435,plastid part|GO:0044434,chloroplast part|GO:0005737,cytoplasm|GO:0009536,plastid|GO:0009507,ch…	GO:0043169,cation binding|GO:0043167,ion binding|GO:0016614,oxidoreductase activity, acting on CH-OH group of donors|GO:0016616,oxidoreductase activity, acting on the CH-OH group of donors, NAD or NADP as acceptor|GO:0003824,catalytic activity|GO:0051287,NAD binding|GO:0000287,magnesium ion binding|GO:0036094,small molecule binding|GO:0000166,nucleotide binding|GO:0050662,coenzyme binding|GO:0004…	ath00020,Citrate cycle (TCA cycle)|ath01230,Biosynthesis of amino acids|ath04146,Peroxisome|ath01210,2-Oxocarboxylic acid metabolism|ath00480,Glutathione metabolism|ath01200,Carbon metabolism|ath01110,Biosynthesis of secondary metabolites|ath01100,Metabolic pathways	http://www.uniprot.org/uniprot/Q8LPJ5
620	hypothetical protein POPTR_0004s05340g	gi|566165056	0.28±0.05	Q9ZP06	At1g53240	GO:0009167,purine ribonucleoside monophosphate metabolic process|GO:0044281,small molecule metabolic process|GO:0009161,ribonucleoside monophosphate metabolic process|GO:0072350,tricarboxylic acid metabolic process|GO:0071840,cellular component organization or biogenesis|GO:0044712,single-organism catabolic process|GO:0044710,single-organism metabolic process|GO:0044711,single-organism biosynthet…	GO:0031974,membrane-enclosed lumen|GO:0048046,apoplast|GO:0043229,intracellular organelle|GO:0071944,cell periphery|GO:0043227,membrane-bounded organelle|GO:0043226,organelle|GO:0005737,cytoplasm|GO:0009536,plastid|GO:0005618,cell wall|GO:0005739,mitochondrion|GO:0005759,mitochondrial matrix|GO:0005794,Golgi apparatus|GO:0030312,external encapsulating structure|GO:0012505,endomembrane system|GO:0…	GO:0043169,cation binding|GO:0046872,metal ion binding|GO:0016614,oxidoreductase activity, acting on CH-OH group of donors|GO:0016615,malate dehydrogenase activity|GO:0016616,oxidoreductase activity, acting on the CH-OH group of donors, NAD or NADP as acceptor|GO:0043167,ion binding|GO:0046914,transition metal ion binding|GO:0003824,catalytic activity|GO:0030060,L-malate dehydrogenase activity|GO…	ath00630,Glyoxylate and dicarboxylate metabolism|ath00620,Pyruvate metabolism|ath00020,Citrate cycle (TCA cycle)|ath00270,Cysteine and methionine metabolism|ath00710,Carbon fixation in photosynthetic organisms|ath01200,Carbon metabolism|ath01110,Biosynthesis of secondary metabolites|ath01100,Metabolic pathways	http://www.uniprot.org/uniprot/Q9ZP06
1028	malate dehydrogenase family protein	gi|224056321	0.5±0.04	O82399	At2g22780	GO:0034440,lipid oxidation|GO:0009894,regulation of catabolic process|GO:0044238,primary metabolic process|GO:0080090,regulation of primary metabolic process|GO:0031329,regulation of cellular catabolic process|GO:0031326,regulation of cellular biosynthetic process|GO:0031323,regulation of cellular metabolic process|GO:0006631,fatty acid metabolic process|GO:0019752,carboxylic acid metabolic proce…	GO:0005737,cytoplasm|GO:0009536,plastid|GO:0043231,intracellular membrane-bounded organelle|GO:0044464,cell part|GO:0005777,peroxisome|GO:0044444,cytoplasmic part|GO:0005623,cell|GO:0005622,intracellular|GO:0042579,microbody|GO:0043229,intracellular organelle|GO:0044424,intracellular part|GO:0009514,glyoxysome|GO:0043227,membrane-bounded organelle|GO:0043226,organelle|GO:0009507,chloroplast	GO:0016614,oxidoreductase activity, acting on CH-OH group of donors|GO:0016615,malate dehydrogenase activity|GO:0016616,oxidoreductase activity, acting on the CH-OH group of donors, NAD or NADP as acceptor|GO:0003824,catalytic activity|GO:0030060,L-malate dehydrogenase activity|GO:0016491,oxidoreductase activity	ath00630,Glyoxylate and dicarboxylate metabolism|ath00620,Pyruvate metabolism|ath00020,Citrate cycle (TCA cycle)|ath00270,Cysteine and methionine metabolism|ath00710,Carbon fixation in photosynthetic organisms|ath01200,Carbon metabolism|ath01110,Biosynthesis of secondary metabolites|ath01100,Metabolic pathways	http://www.uniprot.org/uniprot/O82399
	ethanol oxidation
184	alcohol-dehydrogenase family protein	gi|566179485	2.93±1.4	Q96533	ADH2	GO:0044710,single-organism metabolic process|GO:0071704,organic substance metabolic process|GO:0044699,single-organism process|GO:0006066,alcohol metabolic process|GO:0006067,ethanol metabolic process|GO:0044281,small molecule metabolic process|GO:0008152,metabolic process|GO:0034308,primary alcohol metabolic process|GO:1901615,organic hydroxy compound metabolic process|GO:0055114,oxidation-reduc…	GO:0005737,cytoplasm|GO:0044464,cell part|GO:0005623,cell|GO:0005622,intracellular|GO:0044424,intracellular part	GO:0005488,binding|GO:0043169,cation binding|GO:0016614,oxidoreductase activity, acting on CH-OH group of donors|GO:0046914,transition metal ion binding|GO:0016616,oxidoreductase activity, acting on the CH-OH group of donors, NAD or NADP as acceptor|GO:0004022,alcohol dehydrogenase (NAD) activity|GO:0043167,ion binding|GO:0003824,catalytic activity|GO:0008270,zinc ion binding|GO:0051903,S-(hydrox…	ath00350,Tyrosine metabolism|ath00010,Glycolysis / Gluconeogenesis|ath01200,Carbon metabolism|ath00071,Fatty acid degradation|ath01110,Biosynthesis of secondary metabolites|ath01100,Metabolic pathways	http://www.uniprot.org/uniprot/Q96533
	fatty acid beta-oxidation
176	PREDICTED: malate dehydrogenase, glyoxysomal	gi|743822923	0.22±0.1	O82399	At2g22780	GO:0034440,lipid oxidation|GO:0009894,regulation of catabolic process|GO:0044238,primary metabolic process|GO:0080090,regulation of primary metabolic process|GO:0031329,regulation of cellular catabolic process|GO:0031326,regulation of cellular biosynthetic process|GO:0031323,regulation of cellular metabolic process|GO:0006631,fatty acid metabolic process|GO:0019752,carboxylic acid metabolic proce…	GO:0005737,cytoplasm|GO:0009536,plastid|GO:0043231,intracellular membrane-bounded organelle|GO:0044464,cell part|GO:0005777,peroxisome|GO:0044444,cytoplasmic part|GO:0005623,cell|GO:0005622,intracellular|GO:0042579,microbody|GO:0043229,intracellular organelle|GO:0044424,intracellular part|GO:0009514,glyoxysome|GO:0043227,membrane-bounded organelle|GO:0043226,organelle|GO:0009507,chloroplast	GO:0016614,oxidoreductase activity, acting on CH-OH group of donors|GO:0016615,malate dehydrogenase activity|GO:0016616,oxidoreductase activity, acting on the CH-OH group of donors, NAD or NADP as acceptor|GO:0003824,catalytic activity|GO:0030060,L-malate dehydrogenase activity|GO:0016491,oxidoreductase activity	ath00630,Glyoxylate and dicarboxylate metabolism|ath00620,Pyruvate metabolism|ath00020,Citrate cycle (TCA cycle)|ath00270,Cysteine and methionine metabolism|ath00710,Carbon fixation in photosynthetic organisms|ath01200,Carbon metabolism|ath01110,Biosynthesis of secondary metabolites|ath01100,Metabolic pathways	http://www.uniprot.org/uniprot/O82399
297	PREDICTED: malate dehydrogenase, glyoxysomal	gi|743795553	0.2±0.05	O82399	At2g22780	GO:0034440,lipid oxidation|GO:0009894,regulation of catabolic process|GO:0044238,primary metabolic process|GO:0080090,regulation of primary metabolic process|GO:0031329,regulation of cellular catabolic process|GO:0031326,regulation of cellular biosynthetic process|GO:0031323,regulation of cellular metabolic process|GO:0006631,fatty acid metabolic process|GO:0019752,carboxylic acid metabolic proce…	GO:0005737,cytoplasm|GO:0009536,plastid|GO:0043231,intracellular membrane-bounded organelle|GO:0044464,cell part|GO:0005777,peroxisome|GO:0044444,cytoplasmic part|GO:0005623,cell|GO:0005622,intracellular|GO:0042579,microbody|GO:0043229,intracellular organelle|GO:0044424,intracellular part|GO:0009514,glyoxysome|GO:0043227,membrane-bounded organelle|GO:0043226,organelle|GO:0009507,chloroplast	GO:0016614,oxidoreductase activity, acting on CH-OH group of donors|GO:0016615,malate dehydrogenase activity|GO:0016616,oxidoreductase activity, acting on the CH-OH group of donors, NAD or NADP as acceptor|GO:0003824,catalytic activity|GO:0030060,L-malate dehydrogenase activity|GO:0016491,oxidoreductase activity	ath00630,Glyoxylate and dicarboxylate metabolism|ath00620,Pyruvate metabolism|ath00020,Citrate cycle (TCA cycle)|ath00270,Cysteine and methionine metabolism|ath00710,Carbon fixation in photosynthetic organisms|ath01200,Carbon metabolism|ath01110,Biosynthesis of secondary metabolites|ath01100,Metabolic pathways	http://www.uniprot.org/uniprot/O82399
596	PREDICTED: aspartate aminotransferase, cytoplasmic	gi|743814108	3.17±1.13	P46644	ASP3	GO:0022622,root system development|GO:0034440,lipid oxidation|GO:0048589,developmental growth|GO:0048588,developmental cell growth|GO:0048468,cell development|GO:0048469,cell maturation|GO:0043449,cellular alkene metabolic process|GO:0044281,small molecule metabolic process|GO:0044282,small molecule catabolic process|GO:0009693,ethylene biosynthetic process|GO:0071840,cellular component organizat…	GO:0005737,cytoplasm|GO:0009536,plastid|GO:0043231,intracellular membrane-bounded organelle|GO:0044464,cell part|GO:0005829,cytosol|GO:0016020,membrane|GO:0005777,peroxisome|GO:0044444,cytoplasmic part|GO:0005623,cell|GO:0005622,intracellular|GO:0042579,microbody|GO:0043229,intracellular organelle|GO:0044424,intracellular part|GO:0043227,membrane-bounded organelle|GO:0043226,organelle|GO:0009507,…	GO:0043168,anion binding|GO:0008483,transaminase activity|GO:0097159,organic cyclic compound binding|GO:0003824,catalytic activity|GO:0070546,L-phenylalanine aminotransferase activity|GO:1901363,heterocyclic compound binding|GO:0004069,L-aspartate:2-oxoglutarate aminotransferase activity|GO:0016740,transferase activity|GO:0048037,cofactor binding|GO:0080130,L-phenylalanine:2-oxoglutarate aminotra…	ath01230,Biosynthesis of amino acids|ath00400,Phenylalanine, tyrosine and tryptophan biosynthesis|ath00220,Arginine biosynthesis|ath00270,Cysteine and methionine metabolism|ath01210,2-Oxocarboxylic acid metabolism|ath00350,Tyrosine metabolism|ath00950,Isoquinoline alkaloid biosynthesis|ath00360,Phenylalanine metabolism|ath01100,Metabolic pathways|ath00710,Carbon fixation in photosynthetic organis…	http://www.uniprot.org/uniprot/P46644
703	PREDICTED: vacuolar protein sorting-associated protein 4B-like	gi|743832246	0.31±0.11	Q9ZNT0	SKD1	GO:0034440,lipid oxidation|GO:0008104,protein localization|GO:0048468,cell development|GO:0061025,membrane fusion|GO:0061024,membrane organization|GO:0055075,potassium ion homeostasis|GO:0044281,small molecule metabolic process|GO:0044282,small molecule catabolic process|GO:0098771,inorganic ion homeostasis|GO:0055078,sodium ion homeostasis|GO:0071840,cellular component organization or biogenesis…	GO:0005770,late endosome|GO:0043229,intracellular organelle|GO:0043227,membrane-bounded organelle|GO:0043226,organelle|GO:0030054,cell junction|GO:0010008,endosome membrane|GO:0005737,cytoplasm|GO:0031090,organelle membrane|GO:0005634,nucleus|GO:0016020,membrane|GO:0098805,whole membrane|GO:0031902,late endosome membrane|GO:0098588,bounding membrane of organelle|GO:0055044,symplast|GO:0012505,end…	GO:0035639,purine ribonucleoside triphosphate binding|GO:0005488,binding|GO:0016887,ATPase activity|GO:0043167,ion binding|GO:1901363,heterocyclic compound binding|GO:1901265,nucleoside phosphate binding|GO:0001882,nucleoside binding|GO:0043168,anion binding|GO:0042623,ATPase activity, coupled|GO:0008568,microtubule-severing ATPase activity|GO:0000166,nucleotide binding|GO:0001883,purine nucleosi…	ath04144,Endocytosis	http://www.uniprot.org/uniprot/Q9ZNT0
1028	malate dehydrogenase family protein	gi|224056321	0.5±0.04	O82399	At2g22780	GO:0034440,lipid oxidation|GO:0009894,regulation of catabolic process|GO:0044238,primary metabolic process|GO:0080090,regulation of primary metabolic process|GO:0031329,regulation of cellular catabolic process|GO:0031326,regulation of cellular biosynthetic process|GO:0031323,regulation of cellular metabolic process|GO:0006631,fatty acid metabolic process|GO:0019752,carboxylic acid metabolic proce…	GO:0005737,cytoplasm|GO:0009536,plastid|GO:0043231,intracellular membrane-bounded organelle|GO:0044464,cell part|GO:0005777,peroxisome|GO:0044444,cytoplasmic part|GO:0005623,cell|GO:0005622,intracellular|GO:0042579,microbody|GO:0043229,intracellular organelle|GO:0044424,intracellular part|GO:0009514,glyoxysome|GO:0043227,membrane-bounded organelle|GO:0043226,organelle|GO:0009507,chloroplast	GO:0016614,oxidoreductase activity, acting on CH-OH group of donors|GO:0016615,malate dehydrogenase activity|GO:0016616,oxidoreductase activity, acting on the CH-OH group of donors, NAD or NADP as acceptor|GO:0003824,catalytic activity|GO:0030060,L-malate dehydrogenase activity|GO:0016491,oxidoreductase activity	ath00630,Glyoxylate and dicarboxylate metabolism|ath00620,Pyruvate metabolism|ath00020,Citrate cycle (TCA cycle)|ath00270,Cysteine and methionine metabolism|ath00710,Carbon fixation in photosynthetic organisms|ath01200,Carbon metabolism|ath01110,Biosynthesis of secondary metabolites|ath01100,Metabolic pathways	http://www.uniprot.org/uniprot/O82399
	fatty acid oxidation
176	PREDICTED: malate dehydrogenase, glyoxysomal	gi|743822923	0.22±0.1	O82399	At2g22780	GO:0034440,lipid oxidation|GO:0009894,regulation of catabolic process|GO:0044238,primary metabolic process|GO:0080090,regulation of primary metabolic process|GO:0031329,regulation of cellular catabolic process|GO:0031326,regulation of cellular biosyntheti_x0000__x0000__x0000__x0000__x0000__x0000__x0000__x0000__x0000__x0000__x0000__x0000__x0000__x0000__x0000__x0000__x0000__x0000__x0000__x0000__x00…	GO:0005737,cytoplasm|GO:0009536,plastid|GO:0043231,intracellular membrane-bounded organelle|GO:0044464,cell part|GO:0005777,peroxisome|GO:0044444,cytoplasmic part|GO:0005623,cell|GO:0005622,intracellular|GO:0042579,microbody|GO:0043229,intracellular organ_x0000__x0000__x0000__x0000__x0000__x0000__x0000__x0000__x0000__x0000__x0000__x0000__x0000__x0000__x0000__x0000__x0000__x0000__x0000__x0000__x00…	GO:0016614,oxidoreductase activity, acting on CH-OH group of donors|GO:0016615,malate dehydrogenase activity|GO:0016616,oxidoreductase activity, acting on the CH-OH group of donors, NAD or NADP as acceptor|GO:0003824,catalytic activity|GO:0030060,L-malate_x0000_䏻_x0000_㾀￦⸒⸒⸒槡⸒槡_x0000__x0000__x0000__x0000__x0000__x0000__x0002__x0000__x0000__x0000__xFFFF__xFFFF__x0000__x0000__x0000__x0000__x0000…	ath00630,Glyoxylate and dicarboxylate metabolism|ath00620,Pyruvate metabolism|ath00020,Citrate cycle (TCA cycle)|ath00270,Cysteine and methionine metabolism|ath00710,Carbon fixation in photosynthetic organisms|ath01200,Carbon metabolism|ath01110,Biosynthe_x0000_䏻_x0000_㾀￦⸒⸒⸒槡⸒槡_x0000__x0000__x0000__x0000__x0000__x0000__x0002__x0000__x0000__x0000__xFFFF__xFFFF__x0000__x0000__x0000__x0000__x0000…	http://www.uniprot.org/uniprot/O82399
297	PREDICTED: malate dehydrogenase, glyoxysomal	gi|743795553	0.2±0.05	O82399	At2g22780	GO:0034440,lipid oxidation|GO:0009894,regulation of catabolic process|GO:0044238,primary metabolic process|GO:0080090,regulation of primary metabolic process|GO:0031329,regulation of cellular catabolic process|GO:0031326,regulation of cellular biosyntheti_x0000__x0000__x0000__x0000__x0000__x0000__x0000__x0000__x0000__x0000__x0000__x0000__x0000__x0000__x0000__x0000__x0000__x0000__x0000__x0000__x00…	GO:0005737,cytoplasm|GO:0009536,plastid|GO:0043231,intracellular membrane-bounded organelle|GO:0044464,cell part|GO:0005777,peroxisome|GO:0044444,cytoplasmic part|GO:0005623,cell|GO:0005622,intracellular|GO:0042579,microbody|GO:0043229,intracellular organ_x0000__x0000__x0000__x0000__x0000__x0000__x0000__x0000__x0000__x0000__x0000__x0000__x0000__x0000__x0000__x0000__x0000__x0000__x0000__x0000__x00…	GO:0016614,oxidoreductase activity, acting on CH-OH group of donors|GO:0016615,malate dehydrogenase activity|GO:0016616,oxidoreductase activity, acting on the CH-OH group of donors, NAD or NADP as acceptor|GO:0003824,catalytic activity|GO:0030060,L-malate_x0000_䉀_x0000_㾀_xFFFF__xFFFF_⸒⸒⸒槡⸒槡_x0000__x0000__x0000__x0000__x0000__x0000__x0002__x0000__x0000__x0000__xFFFF__xFFFF__x0000_㨀 㽭_x0000_㨀_x00…	ath00630,Glyoxylate and dicarboxylate metabolism|ath00620,Pyruvate metabolism|ath00020,Citrate cycle (TCA cycle)|ath00270,Cysteine and methionine metabolism|ath00710,Carbon fixation in photosynthetic organisms|ath01200,Carbon metabolism|ath01110,Biosynthe耀䐽_x0000_㾀￦⸒⸒⸒槡⸒槡_x0000__x0000__x0000__x0000__x0000__x0000__x0002__x0000__x0000__x0000__xFFFF__xFFFF__x0000__x0000__x0000__x0000__x0000__x000…	http://www.uniprot.org/uniprot/O82399
596	PREDICTED: aspartate aminotransferase, cytoplasmic	gi|743814108	3.17±1.13	P46644	ASP3	GO:0022622,root system development|GO:0034440,lipid oxidation|GO:0048589,developmental growth|GO:0048588,developmental cell growth|GO:0048468,cell development|GO:0048469,cell maturation|GO:0043449,cellular alkene metabolic process|GO:0044281,small molecule metabolic process|GO:0044282,small molecule catabolic process|GO:0009693,ethylene biosynthetic process|GO:0071840,cellular component organizat…	GO:0005737,cytoplasm|GO:0009536,plastid|GO:0043231,intracellular membrane-bounded organelle|GO:0044464,cell part|GO:0005829,cytosol|GO:0016020,membrane|GO:0005777,peroxisome|GO:0044444,cytoplasmic part|GO:0005623,cell|GO:0005622,intracellular|GO:0042579,microbody|GO:0043229,intracellular organelle|GO:0044424,intracellular part|GO:0043227,membrane-bounded organelle|GO:0043226,organelle|GO:0009507,…	GO:0043168,anion binding|GO:0008483,transaminase activity|GO:0097159,organic cyclic compound binding|GO:0003824,catalytic activity|GO:0070546,L-phenylalanine aminotransferase activity|GO:1901363,heterocyclic compound binding|GO:0004069,L-aspartate:2-oxoglutarate aminotransferase activity|GO:0016740,transferase activity|GO:0048037,cofactor binding|GO:0080130,L-phenylalanine:2-oxoglutarate aminotra…	ath01230,Biosynthesis of amino acids|ath00400,Phenylalanine, tyrosine and tryptophan biosynthesis|ath00220,Arginine biosynthesis|ath00270,Cysteine and methionine metabolism|ath01210,2-Oxocarboxylic acid metabolism|ath00350,Tyrosine metabolism|ath00950,Isoquinoline alkaloid biosynthesis|ath00360,Phenylalanine metabolism|ath01100,Metabolic pathways|ath00710,Carbon fixation in photosynthetic organis…	http://www.uniprot.org/uniprot/P46644
703	PREDICTED: vacuolar protein sorting-associated protein 4B-like	gi|743832246	0.31±0.11	Q9ZNT0	SKD1	GO:0034440,lipid oxidation|GO:0008104,protein localization|GO:0048468,cell development|GO:0061025,membrane fusion|GO:0061024,membrane organization|GO:0055075,potassium ion homeostasis|GO:0044281,small molecule metabolic process|GO:0044282,small molecule catabolic process|GO:0098771,inorganic ion homeostasis|GO:0055078,sodium ion homeostasis|GO:0071840,cellular component organization or biogenesis…	GO:0005770,late endosome|GO:0043229,intracellular organelle|GO:0043227,membrane-bounded organelle|GO:0043226,organelle|GO:0030054,cell junction|GO:0010008,endosome membrane|GO:0005737,cytoplasm|GO:0031090,organelle membrane|GO:0005634,nucleus|GO:0016020,membrane|GO:0098805,whole membrane|GO:0031902,late endosome membrane|GO:0098588,bounding membrane of organelle|GO:0055044,symplast|GO:0012505,end…	GO:0035639,purine ribonucleoside triphosphate binding|GO:0005488,binding|GO:0016887,ATPase activity|GO:0043167,ion binding|GO:1901363,heterocyclic compound binding|GO:1901265,nucleoside phosphate binding|GO:0001882,nucleoside binding|GO:0043168,anion binding|GO:0042623,ATPase activity, coupled|GO:0008568,microtubule-severing ATPase activity|GO:0000166,nucleotide binding|GO:0001883,purine nucleosi…	ath04144,Endocytosis	http://www.uniprot.org/uniprot/Q9ZNT0
1028	malate dehydrogenase family protein	gi|224056321	0.5±0.04	O82399	At2g22780	GO:0034440,lipid oxidation|GO:0009894,regulation of catabolic process|GO:0044238,primary metabolic process|GO:0080090,regulation of primary metabolic process|GO:0031329,regulation of cellular catabolic process|GO:0031326,regulation of cellular biosynthetic process|GO:0031323,regulation of cellular metabolic process|GO:0006631,fatty acid metabolic process|GO:0019752,carboxylic acid metabolic proce…	GO:0005737,cytoplasm|GO:0009536,plastid|GO:0043231,intracellular membrane-bounded organelle|GO:0044464,cell part|GO:0005777,peroxisome|GO:0044444,cytoplasmic part|GO:0005623,cell|GO:0005622,intracellular|GO:0042579,microbody|GO:0043229,intracellular organelle|GO:0044424,intracellular part|GO:0009514,glyoxysome|GO:0043227,membrane-bounded organelle|GO:0043226,organelle|GO:0009507,chloroplast	GO:0016614,oxidoreductase activity, acting on CH-OH group of donors|GO:0016615,malate dehydrogenase activity|GO:0016616,oxidoreductase activity, acting on the CH-OH group of donors, NAD or NADP as acceptor|GO:0003824,catalytic activity|GO:0030060,L-malate dehydrogenase activity|GO:0016491,oxidoreductase activity	ath00630,Glyoxylate and dicarboxylate metabolism|ath00620,Pyruvate metabolism|ath00020,Citrate cycle (TCA cycle)|ath00270,Cysteine and methionine metabolism|ath00710,Carbon fixation in photosynthetic organisms|ath01200,Carbon metabolism|ath01110,Biosynthesis of secondary metabolites|ath01100,Metabolic pathways	http://www.uniprot.org/uniprot/O82399
	hydrogen peroxide biosynthetic process
866	PREDICTED: pyruvate dehydrogenase (acetyl-transferring) kinase, mitochondrial	gi|743910930	2.65±1.44	P49333	ETR1	GO:0009723,response to ethylene|GO:0009593,detection of chemical stimulus|GO:0048585,negative regulation of response to stimulus|GO:0048583,regulation of response to stimulus|GO:0048580,regulation of post-embryonic development|GO:0072359,circulatory system development|GO:0072358,cardiovascular system development|GO:0009690,cytokinin metabolic process|GO:0007165,signal transduction|GO:0023014,sign…	GO:0005783,endoplasmic reticulum|GO:0005789,endoplasmic reticulum membrane|GO:0042175,nuclear outer membrane-endoplasmic reticulum membrane network|GO:0043229,intracellular organelle|GO:0043227,membrane-bounded organelle|GO:0043226,organelle|GO:0031224,intrinsic component of membrane|GO:0005737,cytoplasm|GO:0031090,organelle membrane|GO:0016021,integral component of membrane|GO:0016020,membrane|G…	GO:0038023,signaling receptor activity|GO:0035639,purine ribonucleoside triphosphate binding|GO:0060089,molecular transducer activity|GO:0004872,receptor activity|GO:0004871,signal transducer activity|GO:0043167,ion binding|GO:1901363,heterocyclic compound binding|GO:0001883,purine nucleoside binding|GO:0001882,nucleoside binding|GO:0043168,anion binding|GO:0043169,cation binding|GO:0005057,recep…	ath04075,Plant hormone signal transduction	http://www.uniprot.org/uniprot/P49333
1213	PREDICTED: hevamine-A-like	gi|743932656	3.17±0.35	P19172	CHIB1	GO:0046348,amino sugar catabolic process|GO:0009409,response to cold|GO:0044707,single-multicellular organism process|GO:0051716,cellular response to stimulus|GO:0070647,protein modification by small protein conjugation or removal|GO:0009611,response to wounding|GO:0018193,peptidyl-amino acid modification|GO:0048731,system development|GO:0003006,developmental process involved in reproduction|GO:0…	GO:0005576,extracellular region|GO:0005615,extracellular space|GO:0044421,extracellular region part	GO:0016787,hydrolase activity|GO:0008843,endochitinase activity|GO:0016798,hydrolase activity, acting on glycosyl bonds|GO:0003824,catalytic activity|GO:0004553,hydrolase activity, hydrolyzing O-glycosyl compounds|GO:0004568,chitinase activity	ath00520,Amino sugar and nucleotide sugar metabolism|ath01100,Metabolic pathways	http://www.uniprot.org/uniprot/P19172
1473	PREDICTED: nitronate monooxygenase	gi|743899657	10.33±7.96	Q24JJ8	GLO3	GO:0006950,response to stress|GO:0048584,positive regulation of response to stimulus|GO:0048583,regulation of response to stimulus|GO:0031349,positive regulation of defense response|GO:0044249,cellular biosynthetic process|GO:0023052,signaling|GO:0007165,signal transduction|GO:0050789,regulation of biological process|GO:0031347,regulation of defense response|GO:0044710,single-organism metabolic p…	GO:0005737,cytoplasm|GO:0043231,intracellular membrane-bounded organelle|GO:0044464,cell part|GO:0005777,peroxisome|GO:0044444,cytoplasmic part|GO:0005623,cell|GO:0005622,intracellular|GO:0042579,microbody|GO:0043229,intracellular organelle|GO:0044424,intracellular part|GO:0043227,membrane-bounded organelle|GO:0043226,organelle	GO:0003973,(S)-2-hydroxy-acid oxidase activity|GO:0005488,binding|GO:0000166,nucleotide binding|GO:1901363,heterocyclic compound binding|GO:1901265,nucleoside phosphate binding|GO:0016491,oxidoreductase activity|GO:0043168,anion binding|GO:0050662,coenzyme binding|GO:0052854,medium-chain-(S)-2-hydroxy-acid oxidase activity|GO:0052852,very-long-chain-(S)-2-hydroxy-acid oxidase activity|GO:0052853,…	ath00630,Glyoxylate and dicarboxylate metabolism|ath04146,Peroxisome|ath01110,Biosynthesis of secondary metabolites|ath01100,Metabolic pathways|ath01200,Carbon metabolism	http://www.uniprot.org/uniprot/Q24JJ8
	hydrogen peroxide catabolic process
42	PREDICTED: glyceraldehyde-3-phosphate dehydrogenase B, chloroplastic isoform X1	gi|743875087	0.32±0.03	P25857	GAPB	GO:0019685,photosynthesis, dark reaction|GO:0080090,regulation of primary metabolic process|GO:0019222,regulation of metabolic process|GO:0051049,regulation of transport|GO:0006778,porphyrin-containing compound metabolic process|GO:0006779,porphyrin-containing compound biosynthetic process|GO:0009409,response to cold|GO:0015977,carbon fixation|GO:0044281,small molecule metabolic process|GO:000963…	GO:0055035,plastid thylakoid membrane|GO:0034357,photosynthetic membrane|GO:0031976,plastid thylakoid|GO:0031975,envelope|GO:0048046,apoplast|GO:0043229,intracellular organelle|GO:0042170,plastid membrane|GO:0005622,intracellular|GO:0043227,membrane-bounded organelle|GO:0043226,organelle|GO:0009535,chloroplast thylakoid membrane|GO:0009534,chloroplast thylakoid|GO:0031984,organelle subcompartment…	GO:0050662,coenzyme binding|GO:0004365,glyceraldehyde-3-phosphate dehydrogenase (NAD+) (phosphorylating) activity|GO:0051287,NAD binding|GO:1901363,heterocyclic compound binding|GO:0043891,glyceraldehyde-3-phosphate dehydrogenase (NAD(P)+) (phosphorylating) activity|GO:0016620,oxidoreductase activity, acting on the aldehyde or oxo group of donors, NAD or NADP as acceptor|GO:0036094,small molecule…	ath00710,Carbon fixation in photosynthetic organisms|ath01100,Metabolic pathways|ath01200,Carbon metabolism	http://www.uniprot.org/uniprot/P25857
48	PREDICTED: presequence protease 1, chloroplastic/mitochondrial	gi|743924688	2.3±0.09	Q9LJL3	PREP1	GO:0048440,carpel development|GO:0048467,gynoecium development|GO:0010038,response to metal ion|GO:0048569,post-embryonic organ development|GO:0009791,post-embryonic development|GO:0042744,hydrogen peroxide catabolic process|GO:0042743,hydrogen peroxide metabolic process|GO:0048481,ovule development|GO:0048827,phyllome development|GO:0007275,multicellular organismal development|GO:0044699,single-…	GO:0031974,membrane-enclosed lumen|GO:0031975,envelope|GO:0048046,apoplast|GO:0043229,intracellular organelle|GO:0043227,membrane-bounded organelle|GO:0043226,organelle|GO:0005737,cytoplasm|GO:0009941,chloroplast envelope|GO:0009536,plastid|GO:0009532,plastid stroma|GO:0009570,chloroplast stroma|GO:0005739,mitochondrion|GO:0044435,plastid part|GO:0044434,chloroplast part|GO:0005759,mitochondrial …	GO:0016787,hydrolase activity|GO:0004175,endopeptidase activity|GO:0004222,metalloendopeptidase activity|GO:0046914,transition metal ion binding|GO:0043169,cation binding|GO:0043167,ion binding|GO:0003824,catalytic activity|GO:0070011,peptidase activity, acting on L-amino acid peptides|GO:0008270,zinc ion binding|GO:0005515,protein binding|GO:0008233,peptidase activity|GO:0046872,metal ion bindin…		http://www.uniprot.org/uniprot/Q9LJL3
95	PREDICTED: catalase isozyme 1	gi|743895899	0.38±0.06	P25819	CAT2	GO:0019725,cellular homeostasis|GO:0009991,response to extracellular stimulus|GO:0009628,response to abiotic stimulus|GO:0008152,metabolic process|GO:0009314,response to radiation|GO:0009648,photoperiodism|GO:0031667,response to nutrient levels|GO:0042592,homeostatic process|GO:0042744,hydrogen peroxide catabolic process|GO:0042743,hydrogen peroxide metabolic process|GO:0042594,response to starva…	GO:0022626,cytosolic ribosome|GO:0031975,envelope|GO:0042579,microbody|GO:0043229,intracellular organelle|GO:0043228,non-membrane-bounded organelle|GO:0009514,glyoxysome|GO:0043227,membrane-bounded organelle|GO:0043226,organelle|GO:0005737,cytoplasm|GO:0009536,plastid|GO:0010319,stromule|GO:0005777,peroxisome|GO:0005739,mitochondrion|GO:0030529,ribonucleoprotein complex|GO:0044435,plastid part|GO…	GO:0043169,cation binding|GO:0043167,ion binding|GO:0046872,metal ion binding|GO:0046914,transition metal ion binding|GO:0020037,heme binding|GO:0046906,tetrapyrrole binding|GO:0097159,organic cyclic compound binding|GO:0016209,antioxidant activity|GO:0050897,cobalt ion binding|GO:1901363,heterocyclic compound binding|GO:0003824,catalytic activity|GO:0005488,binding|GO:0005515,protein binding|GO:…	ath00630,Glyoxylate and dicarboxylate metabolism|ath04146,Peroxisome|ath01110,Biosynthesis of secondary metabolites|ath00380,Tryptophan metabolism|ath01200,Carbon metabolism	http://www.uniprot.org/uniprot/P25819
389	hypothetical protein POPTR_0010s15200g	gi|566190935	2.84±1.48	A8MS68	LPD1	GO:0006637,acyl-CoA metabolic process|GO:0006732,coenzyme metabolic process|GO:0019752,carboxylic acid metabolic process|GO:0042592,homeostatic process|GO:0044249,cellular biosynthetic process|GO:0042744,hydrogen peroxide catabolic process|GO:0009108,coenzyme biosynthetic process|GO:0044281,small molecule metabolic process|GO:0006090,pyruvate metabolic process|GO:0050789,regulation of biological …	GO:0031974,membrane-enclosed lumen|GO:0031975,envelope|GO:0043229,intracellular organelle|GO:0043228,non-membrane-bounded organelle|GO:0043227,membrane-bounded organelle|GO:0043226,organelle|GO:0005737,cytoplasm|GO:0009941,chloroplast envelope|GO:0009536,plastid|GO:0031981,nuclear lumen|GO:0005730,nucleolus|GO:0009570,chloroplast stroma|GO:0005634,nucleus|GO:0044435,plastid part|GO:0044434,chloro…	GO:0043168,anion binding|GO:0050662,coenzyme binding|GO:0050660,flavin adenine dinucleotide binding|GO:0005488,binding|GO:0097159,organic cyclic compound binding|GO:0000166,nucleotide binding|GO:0036094,small molecule binding|GO:0003824,catalytic activity|GO:0048037,cofactor binding|GO:0016651,oxidoreductase activity, acting on NAD(P)H|GO:0016667,oxidoreductase activity, acting on a sulfur group …	ath00630,Glyoxylate and dicarboxylate metabolism|ath00620,Pyruvate metabolism|ath00020,Citrate cycle (TCA cycle)|ath00260,Glycine, serine and threonine metabolism|ath00010,Glycolysis / Gluconeogenesis|ath00640,Propanoate metabolism|ath01200,Carbon metabolism|ath01110,Biosynthesis of secondary metabolites|ath01100,Metabolic pathways|ath00280,Valine, leucine and isoleucine degradation	http://www.uniprot.org/uniprot/A8MS68
450	PREDICTED: peroxidase 12-like	gi|743899195	4.27±0.28	Q96520	PER12	GO:0048638,regulation of developmental growth|GO:0048466,androecium development|GO:0008152,metabolic process|GO:0048589,developmental growth|GO:0048443,stamen development|GO:0048569,post-embryonic organ development|GO:0009791,post-embryonic development|GO:0042744,hydrogen peroxide catabolic process|GO:0035266,meristem growth|GO:0050789,regulation of biological process|GO:0044699,single-organism p…	GO:0043229,intracellular organelle|GO:0071944,cell periphery|GO:0043227,membrane-bounded organelle|GO:0043226,organelle|GO:0030054,cell junction|GO:0005737,cytoplasm|GO:0005773,vacuole|GO:0016020,membrane|GO:0030312,external encapsulating structure|GO:0055044,symplast|GO:0005911,cell-cell junction|GO:0009505,plant-type cell wall|GO:0009506,plasmodesma|GO:0043231,intracellular membrane-bounded org…	GO:0043169,cation binding|GO:0046872,metal ion binding|GO:0020037,heme binding|GO:0046906,tetrapyrrole binding|GO:0097159,organic cyclic compound binding|GO:0016209,antioxidant activity|GO:0043167,ion binding|GO:1901363,heterocyclic compound binding|GO:0003824,catalytic activity|GO:0005488,binding|GO:0016684,oxidoreductase activity, acting on peroxide as acceptor|GO:0004601,peroxidase activity|GO…	ath00940,Phenylpropanoid biosynthesis|ath01100,Metabolic pathways|ath01110,Biosynthesis of secondary metabolites	http://www.uniprot.org/uniprot/Q96520
493	PREDICTED: uncharacterized protein LOC105113849	gi|743928577	0.46±0.1	Q9FX85	PER10	GO:0044712,single-organism catabolic process|GO:0044710,single-organism metabolic process|GO:0044237,cellular metabolic process|GO:0050896,response to stimulus|GO:0009987,cellular process|GO:0072593,reactive oxygen species metabolic process|GO:0044248,cellular catabolic process|GO:0006950,response to stress|GO:0042744,hydrogen peroxide catabolic process|GO:0044763,single-organism cellular process…	GO:0005576,extracellular region	GO:0043169,cation binding|GO:0046872,metal ion binding|GO:0020037,heme binding|GO:0046906,tetrapyrrole binding|GO:0097159,organic cyclic compound binding|GO:0016209,antioxidant activity|GO:0043167,ion binding|GO:1901363,heterocyclic compound binding|GO:0003824,catalytic activity|GO:0005488,binding|GO:0016684,oxidoreductase activity, acting on peroxide as acceptor|GO:0004601,peroxidase activity|GO…	ath00940,Phenylpropanoid biosynthesis|ath01100,Metabolic pathways|ath01110,Biosynthesis of secondary metabolites	http://www.uniprot.org/uniprot/Q9FX85
931	PREDICTED: presequence protease 1, chloroplastic/mitochondrial isoform X2	gi|743794407	2.46±0.13	Q9LJL3	PREP1	GO:0048440,carpel development|GO:0048467,gynoecium development|GO:0010038,response to metal ion|GO:0048569,post-embryonic organ development|GO:0009791,post-embryonic development|GO:0042744,hydrogen peroxide catabolic process|GO:0042743,hydrogen peroxide metabolic process|GO:0048481,ovule development|GO:0048827,phyllome development|GO:0007275,multicellular organismal development|GO:0044699,single-…	GO:0031974,membrane-enclosed lumen|GO:0031975,envelope|GO:0048046,apoplast|GO:0043229,intracellular organelle|GO:0043227,membrane-bounded organelle|GO:0043226,organelle|GO:0005737,cytoplasm|GO:0009941,chloroplast envelope|GO:0009536,plastid|GO:0009532,plastid stroma|GO:0009570,chloroplast stroma|GO:0005739,mitochondrion|GO:0044435,plastid part|GO:0044434,chloroplast part|GO:0005759,mitochondrial …	GO:0016787,hydrolase activity|GO:0004175,endopeptidase activity|GO:0004222,metalloendopeptidase activity|GO:0046914,transition metal ion binding|GO:0043169,cation binding|GO:0043167,ion binding|GO:0003824,catalytic activity|GO:0070011,peptidase activity, acting on L-amino acid peptides|GO:0008270,zinc ion binding|GO:0005515,protein binding|GO:0008233,peptidase activity|GO:0046872,metal ion bindin…		http://www.uniprot.org/uniprot/Q9LJL3
962	PREDICTED: monodehydroascorbate reductase, chloroplastic	gi|743852770	2±0.1	P92947	At1g63940	GO:0008152,metabolic process|GO:0044248,cellular catabolic process|GO:0042744,hydrogen peroxide catabolic process|GO:0042743,hydrogen peroxide metabolic process|GO:0044699,single-organism process|GO:0044712,single-organism catabolic process|GO:0044710,single-organism metabolic process|GO:0046686,response to cadmium ion|GO:0009987,cellular process|GO:0072593,reactive oxygen species metabolic proce…	GO:0031975,envelope|GO:0043229,intracellular organelle|GO:0043227,membrane-bounded organelle|GO:0043226,organelle|GO:0005737,cytoplasm|GO:0009536,plastid|GO:0009532,plastid stroma|GO:0009570,chloroplast stroma|GO:0010319,stromule|GO:0005739,mitochondrion|GO:0044435,plastid part|GO:0044434,chloroplast part|GO:0031967,organelle envelope|GO:0009507,chloroplast|GO:0009526,plastid envelope|GO:0043231,…	GO:0035639,purine ribonucleoside triphosphate binding|GO:0005488,binding|GO:0000166,nucleotide binding|GO:1901363,heterocyclic compound binding|GO:1901265,nucleoside phosphate binding|GO:0001882,nucleoside binding|GO:0043168,anion binding|GO:0050662,coenzyme binding|GO:0050660,flavin adenine dinucleotide binding|GO:0043167,ion binding|GO:0001883,purine nucleoside binding|GO:0032549,ribonucleoside…	ath00053,Ascorbate and aldarate metabolism|ath01100,Metabolic pathways	http://www.uniprot.org/uniprot/P92947
1523	class III peroxidase	gi|591403292	2.17±0.6	Q9LE15	PER4	GO:0044248,cellular catabolic process|GO:0042744,hydrogen peroxide catabolic process|GO:0042743,hydrogen peroxide metabolic process|GO:0036294,cellular response to decreased oxygen levels|GO:0070887,cellular response to chemical stimulus|GO:0001666,response to hypoxia|GO:0044699,single-organism process|GO:0044712,single-organism catabolic process|GO:0044710,single-organism metabolic process|GO:00…	GO:0005576,extracellular region	GO:0043169,cation binding|GO:0046872,metal ion binding|GO:0020037,heme binding|GO:0046906,tetrapyrrole binding|GO:0097159,organic cyclic compound binding|GO:0016209,antioxidant activity|GO:0043167,ion binding|GO:1901363,heterocyclic compound binding|GO:0003824,catalytic activity|GO:0005488,binding|GO:0016684,oxidoreductase activity, acting on peroxide as acceptor|GO:0004601,peroxidase activity|GO…	ath00940,Phenylpropanoid biosynthesis|ath01100,Metabolic pathways|ath01110,Biosynthesis of secondary metabolites	http://www.uniprot.org/uniprot/Q9LE15
	hydrogen peroxide metabolic process
41	PREDICTED: oxygen-evolving enhancer protein 1, chloroplastic	gi|743921083	0.12±0.01	Q9S841	PSBO2	GO:0008104,protein localization|GO:0019220,regulation of phosphate metabolic process|GO:0080090,regulation of primary metabolic process|GO:0019222,regulation of metabolic process|GO:0019682,glyceraldehyde-3-phosphate metabolic process|GO:0048585,negative regulation of response to stimulus|GO:0051667,establishment of plastid localization|GO:0048583,regulation of response to stimulus|GO:0031348,neg…	GO:0055035,plastid thylakoid membrane|GO:0034357,photosynthetic membrane|GO:0031976,plastid thylakoid|GO:0031977,thylakoid lumen|GO:0019898,extrinsic component of membrane|GO:0043229,intracellular organelle|GO:0005622,intracellular|GO:0009654,photosystem II oxygen evolving complex|GO:0043226,organelle|GO:0031224,intrinsic component of membrane|GO:0009535,chloroplast thylakoid membrane|GO:0009534,…	GO:0005488,binding|GO:0043169,cation binding|GO:0005515,protein binding|GO:0097159,organic cyclic compound binding|GO:0043167,ion binding|GO:0008266,poly(U) RNA binding|GO:0003727,single-stranded RNA binding|GO:0003723,RNA binding|GO:0003676,nucleic acid binding|GO:0008187,poly-pyrimidine tract binding|GO:0046872,metal ion binding|GO:1901363,heterocyclic compound binding|GO:0005509,calcium ion bi…	ath00195,Photosynthesis|ath01100,Metabolic pathways	http://www.uniprot.org/uniprot/Q9S841
42	PREDICTED: glyceraldehyde-3-phosphate dehydrogenase B, chloroplastic isoform X1	gi|743875087	0.32±0.03	P25857	GAPB	GO:0019685,photosynthesis, dark reaction|GO:0080090,regulation of primary metabolic process|GO:0019222,regulation of metabolic process|GO:0051049,regulation of transport|GO:0006778,porphyrin-containing compound metabolic process|GO:0006779,porphyrin-containing compound biosynthetic process|GO:0009409,response to cold|GO:0015977,carbon fixation|GO:0044281,small molecule metabolic process|GO:000963…	GO:0055035,plastid thylakoid membrane|GO:0034357,photosynthetic membrane|GO:0031976,plastid thylakoid|GO:0031975,envelope|GO:0048046,apoplast|GO:0043229,intracellular organelle|GO:0042170,plastid membrane|GO:0005622,intracellular|GO:0043227,membrane-bounded organelle|GO:0043226,organelle|GO:0009535,chloroplast thylakoid membrane|GO:0009534,chloroplast thylakoid|GO:0031984,organelle subcompartment…	GO:0050662,coenzyme binding|GO:0004365,glyceraldehyde-3-phosphate dehydrogenase (NAD+) (phosphorylating) activity|GO:0051287,NAD binding|GO:1901363,heterocyclic compound binding|GO:0043891,glyceraldehyde-3-phosphate dehydrogenase (NAD(P)+) (phosphorylating) activity|GO:0016620,oxidoreductase activity, acting on the aldehyde or oxo group of donors, NAD or NADP as acceptor|GO:0036094,small molecule…	ath00710,Carbon fixation in photosynthetic organisms|ath01100,Metabolic pathways|ath01200,Carbon metabolism	http://www.uniprot.org/uniprot/P25857
48	PREDICTED: presequence protease 1, chloroplastic/mitochondrial	gi|743924688	2.3±0.09	Q9LJL3	PREP1	GO:0048440,carpel development|GO:0048467,gynoecium development|GO:0010038,response to metal ion|GO:0048569,post-embryonic organ development|GO:0009791,post-embryonic development|GO:0042744,hydrogen peroxide catabolic process|GO:0042743,hydrogen peroxide metabolic process|GO:0048481,ovule development|GO:0048827,phyllome development|GO:0007275,multicellular organismal development|GO:0044699,single-…	GO:0031974,membrane-enclosed lumen|GO:0031975,envelope|GO:0048046,apoplast|GO:0043229,intracellular organelle|GO:0043227,membrane-bounded organelle|GO:0043226,organelle|GO:0005737,cytoplasm|GO:0009941,chloroplast envelope|GO:0009536,plastid|GO:0009532,plastid stroma|GO:0009570,chloroplast stroma|GO:0005739,mitochondrion|GO:0044435,plastid part|GO:0044434,chloroplast part|GO:0005759,mitochondrial …	GO:0016787,hydrolase activity|GO:0004175,endopeptidase activity|GO:0004222,metalloendopeptidase activity|GO:0046914,transition metal ion binding|GO:0043169,cation binding|GO:0043167,ion binding|GO:0003824,catalytic activity|GO:0070011,peptidase activity, acting on L-amino acid peptides|GO:0008270,zinc ion binding|GO:0005515,protein binding|GO:0008233,peptidase activity|GO:0046872,metal ion bindin…		http://www.uniprot.org/uniprot/Q9LJL3
89	PREDICTED: sedoheptulose-1,7-bisphosphatase, chloroplastic	gi|743879686	0.19±0.05	P46283	At3g55800	GO:0009595,detection of biotic stimulus|GO:0006520,cellular amino acid metabolic process|GO:0019220,regulation of phosphate metabolic process|GO:0080090,regulation of primary metabolic process|GO:0019222,regulation of metabolic process|GO:0006470,protein dephosphorylation|GO:0048585,negative regulation of response to stimulus|GO:0048583,regulation of response to stimulus|GO:0031348,negative regul…	GO:0031975,envelope|GO:0048046,apoplast|GO:0043229,intracellular organelle|GO:0043227,membrane-bounded organelle|GO:0043226,organelle|GO:0005737,cytoplasm|GO:0009941,chloroplast envelope|GO:0009536,plastid|GO:0009532,plastid stroma|GO:0009570,chloroplast stroma|GO:0044435,plastid part|GO:0044434,chloroplast part|GO:0009579,thylakoid|GO:0031967,organelle envelope|GO:0009507,chloroplast|GO:0009526,…	GO:0050308,sugar-phosphatase activity|GO:0019203,carbohydrate phosphatase activity|GO:0042132,fructose 1,6-bisphosphate 1-phosphatase activity|GO:0016791,phosphatase activity|GO:0016787,hydrolase activity|GO:0043169,cation binding|GO:0016788,hydrolase activity, acting on ester bonds|GO:0043167,ion binding|GO:0042578,phosphoric ester hydrolase activity|GO:0003824,catalytic activity|GO:0005488,bind…	ath00710,Carbon fixation in photosynthetic organisms|ath01100,Metabolic pathways|ath01200,Carbon metabolism	http://www.uniprot.org/uniprot/P46283
95	PREDICTED: catalase isozyme 1	gi|743895899	0.38±0.06	P25819	CAT2	GO:0019725,cellular homeostasis|GO:0009991,response to extracellular stimulus|GO:0009628,response to abiotic stimulus|GO:0008152,metabolic process|GO:0009314,response to radiation|GO:0009648,photoperiodism|GO:0031667,response to nutrient levels|GO:0042592,homeostatic process|GO:0042744,hydrogen peroxide catabolic process|GO:0042743,hydrogen peroxide metabolic process|GO:0042594,response to starva…	GO:0022626,cytosolic ribosome|GO:0031975,envelope|GO:0042579,microbody|GO:0043229,intracellular organelle|GO:0043228,non-membrane-bounded organelle|GO:0009514,glyoxysome|GO:0043227,membrane-bounded organelle|GO:0043226,organelle|GO:0005737,cytoplasm|GO:0009536,plastid|GO:0010319,stromule|GO:0005777,peroxisome|GO:0005739,mitochondrion|GO:0030529,ribonucleoprotein complex|GO:0044435,plastid part|GO…	GO:0043169,cation binding|GO:0043167,ion binding|GO:0046872,metal ion binding|GO:0046914,transition metal ion binding|GO:0020037,heme binding|GO:0046906,tetrapyrrole binding|GO:0097159,organic cyclic compound binding|GO:0016209,antioxidant activity|GO:0050897,cobalt ion binding|GO:1901363,heterocyclic compound binding|GO:0003824,catalytic activity|GO:0005488,binding|GO:0005515,protein binding|GO:…	ath00630,Glyoxylate and dicarboxylate metabolism|ath04146,Peroxisome|ath01110,Biosynthesis of secondary metabolites|ath00380,Tryptophan metabolism|ath01200,Carbon metabolism	http://www.uniprot.org/uniprot/P25819
153	PREDICTED: oxygen-evolving enhancer protein 2, chloroplastic-like	gi|743840443	0.12±0.01	Q42029	PSBP1	GO:0009595,detection of biotic stimulus|GO:0008104,protein localization|GO:0019222,regulation of metabolic process|GO:0051049,regulation of transport|GO:0048585,negative regulation of response to stimulus|GO:0048583,regulation of response to stimulus|GO:0031348,negative regulation of defense response|GO:0009696,salicylic acid metabolic process|GO:0009697,salicylic acid biosynthetic process|GO:000…	GO:0031978,plastid thylakoid lumen|GO:0055035,plastid thylakoid membrane|GO:0034357,photosynthetic membrane|GO:0031976,plastid thylakoid|GO:0031977,thylakoid lumen|GO:0019898,extrinsic component of membrane|GO:0048046,apoplast|GO:0043229,intracellular organelle|GO:0009579,thylakoid|GO:0043227,membrane-bounded organelle|GO:0043226,organelle|GO:0009535,chloroplast thylakoid membrane|GO:0009534,chlo…	GO:0005488,binding|GO:0043169,cation binding|GO:0097159,organic cyclic compound binding|GO:0043167,ion binding|GO:0008266,poly(U) RNA binding|GO:0003727,single-stranded RNA binding|GO:0003723,RNA binding|GO:0003676,nucleic acid binding|GO:0008187,poly-pyrimidine tract binding|GO:0046872,metal ion binding|GO:1901363,heterocyclic compound binding|GO:0005509,calcium ion binding	ath00195,Photosynthesis|ath01100,Metabolic pathways	http://www.uniprot.org/uniprot/Q42029
389	hypothetical protein POPTR_0010s15200g	gi|566190935	2.84±1.48	A8MS68	LPD1	GO:0006637,acyl-CoA metabolic process|GO:0006732,coenzyme metabolic process|GO:0019752,carboxylic acid metabolic process|GO:0042592,homeostatic process|GO:0044249,cellular biosynthetic process|GO:0042744,hydrogen peroxide catabolic process|GO:0009108,coenzyme biosynthetic process|GO:0044281,small molecule metabolic process|GO:0006090,pyruvate metabolic process|GO:0050789,regulation of biological …	GO:0031974,membrane-enclosed lumen|GO:0031975,envelope|GO:0043229,intracellular organelle|GO:0043228,non-membrane-bounded organelle|GO:0043227,membrane-bounded organelle|GO:0043226,organelle|GO:0005737,cytoplasm|GO:0009941,chloroplast envelope|GO:0009536,plastid|GO:0031981,nuclear lumen|GO:0005730,nucleolus|GO:0009570,chloroplast stroma|GO:0005634,nucleus|GO:0044435,plastid part|GO:0044434,chloro…	GO:0043168,anion binding|GO:0050662,coenzyme binding|GO:0050660,flavin adenine dinucleotide binding|GO:0005488,binding|GO:0097159,organic cyclic compound binding|GO:0000166,nucleotide binding|GO:0036094,small molecule binding|GO:0003824,catalytic activity|GO:0048037,cofactor binding|GO:0016651,oxidoreductase activity, acting on NAD(P)H|GO:0016667,oxidoreductase activity, acting on a sulfur group …	ath00630,Glyoxylate and dicarboxylate metabolism|ath00620,Pyruvate metabolism|ath00020,Citrate cycle (TCA cycle)|ath00260,Glycine, serine and threonine metabolism|ath00010,Glycolysis / Gluconeogenesis|ath00640,Propanoate metabolism|ath01200,Carbon metabolism|ath01110,Biosynthesis of secondary metabolites|ath01100,Metabolic pathways|ath00280,Valine, leucine and isoleucine degradation	http://www.uniprot.org/uniprot/A8MS68
450	PREDICTED: peroxidase 12-like	gi|743899195	4.27±0.28	Q96520	PER12	GO:0048638,regulation of developmental growth|GO:0048466,androecium development|GO:0008152,metabolic process|GO:0048589,developmental growth|GO:0048443,stamen development|GO:0048569,post-embryonic organ development|GO:0009791,post-embryonic development|GO:0042744,hydrogen peroxide catabolic process|GO:0035266,meristem growth|GO:0050789,regulation of biological process|GO:0044699,single-organism p…	GO:0043229,intracellular organelle|GO:0071944,cell periphery|GO:0043227,membrane-bounded organelle|GO:0043226,organelle|GO:0030054,cell junction|GO:0005737,cytoplasm|GO:0005773,vacuole|GO:0016020,membrane|GO:0030312,external encapsulating structure|GO:0055044,symplast|GO:0005911,cell-cell junction|GO:0009505,plant-type cell wall|GO:0009506,plasmodesma|GO:0043231,intracellular membrane-bounded org…	GO:0043169,cation binding|GO:0046872,metal ion binding|GO:0020037,heme binding|GO:0046906,tetrapyrrole binding|GO:0097159,organic cyclic compound binding|GO:0016209,antioxidant activity|GO:0043167,ion binding|GO:1901363,heterocyclic compound binding|GO:0003824,catalytic activity|GO:0005488,binding|GO:0016684,oxidoreductase activity, acting on peroxide as acceptor|GO:0004601,peroxidase activity|GO…	ath00940,Phenylpropanoid biosynthesis|ath01100,Metabolic pathways|ath01110,Biosynthesis of secondary metabolites	http://www.uniprot.org/uniprot/Q96520
493	PREDICTED: uncharacterized protein LOC105113849	gi|743928577	0.46±0.1	Q9FX85	PER10	GO:0044712,single-organism catabolic process|GO:0044710,single-organism metabolic process|GO:0044237,cellular metabolic process|GO:0050896,response to stimulus|GO:0009987,cellular process|GO:0072593,reactive oxygen species metabolic process|GO:0044248,cellular catabolic process|GO:0006950,response to stress|GO:0042744,hydrogen peroxide catabolic process|GO:0044763,single-organism cellular process…	GO:0005576,extracellular region	GO:0043169,cation binding|GO:0046872,metal ion binding|GO:0020037,heme binding|GO:0046906,tetrapyrrole binding|GO:0097159,organic cyclic compound binding|GO:0016209,antioxidant activity|GO:0043167,ion binding|GO:1901363,heterocyclic compound binding|GO:0003824,catalytic activity|GO:0005488,binding|GO:0016684,oxidoreductase activity, acting on peroxide as acceptor|GO:0004601,peroxidase activity|GO…	ath00940,Phenylpropanoid biosynthesis|ath01100,Metabolic pathways|ath01110,Biosynthesis of secondary metabolites	http://www.uniprot.org/uniprot/Q9FX85
579	O2 evolving complex 33kD family protein	gi|224094610	0.23±0.17	Q9S841	PSBO2	GO:0008104,protein localization|GO:0019220,regulation of phosphate metabolic process|GO:0080090,regulation of primary metabolic process|GO:0019222,regulation of metabolic process|GO:0019682,glyceraldehyde-3-phosphate metabolic process|GO:0048585,negative regulation of response to stimulus|GO:0051667,establishment of plastid localization|GO:0048583,regulation of response to stimulus|GO:0031348,neg…	GO:0055035,plastid thylakoid membrane|GO:0034357,photosynthetic membrane|GO:0031976,plastid thylakoid|GO:0031977,thylakoid lumen|GO:0019898,extrinsic component of membrane|GO:0043229,intracellular organelle|GO:0005622,intracellular|GO:0009654,photosystem II oxygen evolving complex|GO:0043226,organelle|GO:0031224,intrinsic component of membrane|GO:0009535,chloroplast thylakoid membrane|GO:0009534,…	GO:0005488,binding|GO:0043169,cation binding|GO:0005515,protein binding|GO:0097159,organic cyclic compound binding|GO:0043167,ion binding|GO:0008266,poly(U) RNA binding|GO:0003727,single-stranded RNA binding|GO:0003723,RNA binding|GO:0003676,nucleic acid binding|GO:0008187,poly-pyrimidine tract binding|GO:0046872,metal ion binding|GO:1901363,heterocyclic compound binding|GO:0005509,calcium ion bi…	ath00195,Photosynthesis|ath01100,Metabolic pathways	http://www.uniprot.org/uniprot/Q9S841
813	PREDICTED: uncharacterized protein LOC105111212	gi|743796298	2.13±0.11	O24520	AHB1	GO:0009628,response to abiotic stimulus|GO:0019222,regulation of metabolic process|GO:0009627,systemic acquired resistance|GO:0031323,regulation of cellular metabolic process|GO:0071229,cellular response to acid chemical|GO:0023052,signaling|GO:0007165,signal transduction|GO:0070887,cellular response to chemical stimulus|GO:0042221,response to chemical|GO:0001666,response to hypoxia|GO:0050789,re…	GO:0005737,cytoplasm|GO:0005618,cell wall|GO:0005829,cytosol|GO:0016020,membrane|GO:0044464,cell part|GO:0005623,cell|GO:0030312,external encapsulating structure|GO:0055044,symplast|GO:0044444,cytoplasmic part|GO:0071944,cell periphery|GO:0009506,plasmodesma|GO:0005911,cell-cell junction|GO:0005886,plasma membrane|GO:0044424,intracellular part|GO:0005622,intracellular|GO:0030054,cell junction	GO:0043169,cation binding|GO:0005344,oxygen transporter activity|GO:0022892,substrate-specific transporter activity|GO:0046914,transition metal ion binding|GO:0020037,heme binding|GO:0046906,tetrapyrrole binding|GO:0005215,transporter activity|GO:0043167,ion binding|GO:0019825,oxygen binding|GO:0005488,binding|GO:0097159,organic cyclic compound binding|GO:0005506,iron ion binding|GO:0046872,metal…		http://www.uniprot.org/uniprot/O24520
866	PREDICTED: pyruvate dehydrogenase (acetyl-transferring) kinase, mitochondrial	gi|743910930	2.65±1.44	P49333	ETR1	GO:0009723,response to ethylene|GO:0009593,detection of chemical stimulus|GO:0048585,negative regulation of response to stimulus|GO:0048583,regulation of response to stimulus|GO:0048580,regulation of post-embryonic development|GO:0072359,circulatory system development|GO:0072358,cardiovascular system development|GO:0009690,cytokinin metabolic process|GO:0007165,signal transduction|GO:0023014,sign…	GO:0005783,endoplasmic reticulum|GO:0005789,endoplasmic reticulum membrane|GO:0042175,nuclear outer membrane-endoplasmic reticulum membrane network|GO:0043229,intracellular organelle|GO:0043227,membrane-bounded organelle|GO:0043226,organelle|GO:0031224,intrinsic component of membrane|GO:0005737,cytoplasm|GO:0031090,organelle membrane|GO:0016021,integral component of membrane|GO:0016020,membrane|G…	GO:0038023,signaling receptor activity|GO:0035639,purine ribonucleoside triphosphate binding|GO:0060089,molecular transducer activity|GO:0004872,receptor activity|GO:0004871,signal transducer activity|GO:0043167,ion binding|GO:1901363,heterocyclic compound binding|GO:0001883,purine nucleoside binding|GO:0001882,nucleoside binding|GO:0043168,anion binding|GO:0043169,cation binding|GO:0005057,recep…	ath04075,Plant hormone signal transduction	http://www.uniprot.org/uniprot/P49333
931	PREDICTED: presequence protease 1, chloroplastic/mitochondrial isoform X2	gi|743794407	2.46±0.13	Q9LJL3	PREP1	GO:0048440,carpel development|GO:0048467,gynoecium development|GO:0010038,response to metal ion|GO:0048569,post-embryonic organ development|GO:0009791,post-embryonic development|GO:0042744,hydrogen peroxide catabolic process|GO:0042743,hydrogen peroxide metabolic process|GO:0048481,ovule development|GO:0048827,phyllome development|GO:0007275,multicellular organismal development|GO:0044699,single-…	GO:0031974,membrane-enclosed lumen|GO:0031975,envelope|GO:0048046,apoplast|GO:0043229,intracellular organelle|GO:0043227,membrane-bounded organelle|GO:0043226,organelle|GO:0005737,cytoplasm|GO:0009941,chloroplast envelope|GO:0009536,plastid|GO:0009532,plastid stroma|GO:0009570,chloroplast stroma|GO:0005739,mitochondrion|GO:0044435,plastid part|GO:0044434,chloroplast part|GO:0005759,mitochondrial …	GO:0016787,hydrolase activity|GO:0004175,endopeptidase activity|GO:0004222,metalloendopeptidase activity|GO:0046914,transition metal ion binding|GO:0043169,cation binding|GO:0043167,ion binding|GO:0003824,catalytic activity|GO:0070011,peptidase activity, acting on L-amino acid peptides|GO:0008270,zinc ion binding|GO:0005515,protein binding|GO:0008233,peptidase activity|GO:0046872,metal ion bindin…		http://www.uniprot.org/uniprot/Q9LJL3
962	PREDICTED: monodehydroascorbate reductase, chloroplastic	gi|743852770	2±0.1	P92947	At1g63940	GO:0008152,metabolic process|GO:0044248,cellular catabolic process|GO:0042744,hydrogen peroxide catabolic process|GO:0042743,hydrogen peroxide metabolic process|GO:0044699,single-organism process|GO:0044712,single-organism catabolic process|GO:0044710,single-organism metabolic process|GO:0046686,response to cadmium ion|GO:0009987,cellular process|GO:0072593,reactive oxygen species metabolic proce…	GO:0031975,envelope|GO:0043229,intracellular organelle|GO:0043227,membrane-bounded organelle|GO:0043226,organelle|GO:0005737,cytoplasm|GO:0009536,plastid|GO:0009532,plastid stroma|GO:0009570,chloroplast stroma|GO:0010319,stromule|GO:0005739,mitochondrion|GO:0044435,plastid part|GO:0044434,chloroplast part|GO:0031967,organelle envelope|GO:0009507,chloroplast|GO:0009526,plastid envelope|GO:0043231,…	GO:0035639,purine ribonucleoside triphosphate binding|GO:0005488,binding|GO:0000166,nucleotide binding|GO:1901363,heterocyclic compound binding|GO:1901265,nucleoside phosphate binding|GO:0001882,nucleoside binding|GO:0043168,anion binding|GO:0050662,coenzyme binding|GO:0050660,flavin adenine dinucleotide binding|GO:0043167,ion binding|GO:0001883,purine nucleoside binding|GO:0032549,ribonucleoside…	ath00053,Ascorbate and aldarate metabolism|ath01100,Metabolic pathways	http://www.uniprot.org/uniprot/P92947
996	PREDICTED: ATP synthase subunit b', chloroplastic-like	gi|743881832	0.4±0.22	Q42139	F10M6.100	GO:0009595,detection of biotic stimulus|GO:0008104,protein localization|GO:0019220,regulation of phosphate metabolic process|GO:0080090,regulation of primary metabolic process|GO:0019222,regulation of metabolic process|GO:0006470,protein dephosphorylation|GO:0048585,negative regulation of response to stimulus|GO:0048583,regulation of response to stimulus|GO:0031348,negative regulation of defense …	GO:0055035,plastid thylakoid membrane|GO:0034357,photosynthetic membrane|GO:0031976,plastid thylakoid|GO:0031975,envelope|GO:0043229,intracellular organelle|GO:0009579,thylakoid|GO:0043227,membrane-bounded organelle|GO:0043226,organelle|GO:0031224,intrinsic component of membrane|GO:0009535,chloroplast thylakoid membrane|GO:0009534,chloroplast thylakoid|GO:0045263,proton-transporting ATP synthase …	GO:0022891,substrate-specific transmembrane transporter activity|GO:0022890,inorganic cation transmembrane transporter activity|GO:0022892,substrate-specific transporter activity|GO:0016787,hydrolase activity|GO:0005215,transporter activity|GO:0008324,cation transmembrane transporter activity|GO:0022857,transmembrane transporter activity|GO:0015075,ion transmembrane transporter activity|GO:000382…	ath00190,Oxidative phosphorylation|ath00195,Photosynthesis|ath01100,Metabolic pathways	http://www.uniprot.org/uniprot/Q42139
1034	hypothetical protein POPTR_0001s14630g	gi|566148978	2.15±1.24	Q9M9E1	ABCG40	GO:0009595,detection of biotic stimulus|GO:0008104,protein localization|GO:0019222,regulation of metabolic process|GO:0048585,negative regulation of response to stimulus|GO:0048583,regulation of response to stimulus|GO:0031348,negative regulation of defense response|GO:0009696,salicylic acid metabolic process|GO:0009697,salicylic acid biosynthetic process|GO:0007165,signal transduction|GO:0044283…	GO:0016021,integral component of membrane|GO:0016020,membrane|GO:0044464,cell part|GO:0005623,cell|GO:0005622,intracellular|GO:0071944,cell periphery|GO:0005886,plasma membrane|GO:0044425,membrane part|GO:0031224,intrinsic component of membrane	GO:0035639,purine ribonucleoside triphosphate binding|GO:0005488,binding|GO:0016887,ATPase activity|GO:0043167,ion binding|GO:1901363,heterocyclic compound binding|GO:1901265,nucleoside phosphate binding|GO:0001882,nucleoside binding|GO:0043168,anion binding|GO:0000166,nucleotide binding|GO:0001883,purine nucleoside binding|GO:0032549,ribonucleoside binding|GO:0017076,purine nucleotide binding|GO…		http://www.uniprot.org/uniprot/Q9M9E1
1047	Mitogen-activated protein kinase 4	gi|224067920	0.47±0.02	Q39024	MPK4	GO:0009595,detection of biotic stimulus|GO:0048467,gynoecium development|GO:0019220,regulation of phosphate metabolic process|GO:0080090,regulation of primary metabolic process|GO:0019222,regulation of metabolic process|GO:0006470,protein dephosphorylation|GO:0048585,negative regulation of response to stimulus|GO:0032260,response to jasmonic acid stimulus involved in jasmonic acid and ethylene-de…	GO:0043229,intracellular organelle|GO:0043228,non-membrane-bounded organelle|GO:0043227,membrane-bounded organelle|GO:0043226,organelle|GO:0005856,cytoskeleton|GO:0005874,microtubule|GO:0005634,nucleus|GO:0044430,cytoskeletal part|GO:0005737,cytoplasm|GO:0015630,microtubule cytoskeleton|GO:0009504,cell plate|GO:0043234,protein complex|GO:0032991,macromolecular complex|GO:0043231,intracellular mem…	GO:0035639,purine ribonucleoside triphosphate binding|GO:0060089,molecular transducer activity|GO:0005488,binding|GO:0004871,signal transducer activity|GO:0043167,ion binding|GO:1901363,heterocyclic compound binding|GO:0001883,purine nucleoside binding|GO:0001882,nucleoside binding|GO:0043168,anion binding|GO:0005057,receptor signaling protein activity|GO:0032549,ribonucleoside binding|GO:0000166…	ath04626,Plant-pathogen interaction|ath04933,AGE-RAGE signaling pathway in diabetic complications	http://www.uniprot.org/uniprot/Q39024
1213	PREDICTED: hevamine-A-like	gi|743932656	3.17±0.35	P19172	CHIB1	GO:0046348,amino sugar catabolic process|GO:0009409,response to cold|GO:0044707,single-multicellular organism process|GO:0051716,cellular response to stimulus|GO:0070647,protein modification by small protein conjugation or removal|GO:0009611,response to wounding|GO:0018193,peptidyl-amino acid modification|GO:0048731,system development|GO:0003006,developmental process involved in reproduction|GO:0…	GO:0005576,extracellular region|GO:0005615,extracellular space|GO:0044421,extracellular region part	GO:0016787,hydrolase activity|GO:0008843,endochitinase activity|GO:0016798,hydrolase activity, acting on glycosyl bonds|GO:0003824,catalytic activity|GO:0004553,hydrolase activity, hydrolyzing O-glycosyl compounds|GO:0004568,chitinase activity	ath00520,Amino sugar and nucleotide sugar metabolism|ath01100,Metabolic pathways	http://www.uniprot.org/uniprot/P19172
1473	PREDICTED: nitronate monooxygenase	gi|743899657	10.33±7.96	Q24JJ8	GLO3	GO:0006950,response to stress|GO:0048584,positive regulation of response to stimulus|GO:0048583,regulation of response to stimulus|GO:0031349,positive regulation of defense response|GO:0044249,cellular biosynthetic process|GO:0023052,signaling|GO:0007165,signal transduction|GO:0050789,regulation of biological process|GO:0031347,regulation of defense response|GO:0044710,single-organism metabolic p…	GO:0005737,cytoplasm|GO:0043231,intracellular membrane-bounded organelle|GO:0044464,cell part|GO:0005777,peroxisome|GO:0044444,cytoplasmic part|GO:0005623,cell|GO:0005622,intracellular|GO:0042579,microbody|GO:0043229,intracellular organelle|GO:0044424,intracellular part|GO:0043227,membrane-bounded organelle|GO:0043226,organelle	GO:0003973,(S)-2-hydroxy-acid oxidase activity|GO:0005488,binding|GO:0000166,nucleotide binding|GO:1901363,heterocyclic compound binding|GO:1901265,nucleoside phosphate binding|GO:0016491,oxidoreductase activity|GO:0043168,anion binding|GO:0050662,coenzyme binding|GO:0052854,medium-chain-(S)-2-hydroxy-acid oxidase activity|GO:0052852,very-long-chain-(S)-2-hydroxy-acid oxidase activity|GO:0052853,…	ath00630,Glyoxylate and dicarboxylate metabolism|ath04146,Peroxisome|ath01110,Biosynthesis of secondary metabolites|ath01100,Metabolic pathways|ath01200,Carbon metabolism	http://www.uniprot.org/uniprot/Q24JJ8
1523	class III peroxidase	gi|591403292	2.17±0.6	Q9LE15	PER4	GO:0044248,cellular catabolic process|GO:0042744,hydrogen peroxide catabolic process|GO:0042743,hydrogen peroxide metabolic process|GO:0036294,cellular response to decreased oxygen levels|GO:0070887,cellular response to chemical stimulus|GO:0001666,response to hypoxia|GO:0044699,single-organism process|GO:0044712,single-organism catabolic process|GO:0044710,single-organism metabolic process|GO:00…	GO:0005576,extracellular region	GO:0043169,cation binding|GO:0046872,metal ion binding|GO:0020037,heme binding|GO:0046906,tetrapyrrole binding|GO:0097159,organic cyclic compound binding|GO:0016209,antioxidant activity|GO:0043167,ion binding|GO:1901363,heterocyclic compound binding|GO:0003824,catalytic activity|GO:0005488,binding|GO:0016684,oxidoreductase activity, acting on peroxide as acceptor|GO:0004601,peroxidase activity|GO…	ath00940,Phenylpropanoid biosynthesis|ath01100,Metabolic pathways|ath01110,Biosynthesis of secondary metabolites	http://www.uniprot.org/uniprot/Q9LE15
	lipid oxidation
176	PREDICTED: malate dehydrogenase, glyoxysomal	gi|743822923	0.22±0.1	O82399	At2g22780	GO:0034440,lipid oxidation|GO:0009894,regulation of catabolic process|GO:0044238,primary metabolic process|GO:0080090,regulation of primary metabolic process|GO:0031329,regulation of cellular catabolic process|GO:0031326,regulation of cellular biosyntheti_x0000__x0000__x0000__x0000__x0000__x0000__x0000__x0000__x0000__x0000__x0000__x0000__x0000__x0000__x0000__x0000__x0000__x0000__x0000__x0000__x00…	GO:0005737,cytoplasm|GO:0009536,plastid|GO:0043231,intracellular membrane-bounded organelle|GO:0044464,cell part|GO:0005777,peroxisome|GO:0044444,cytoplasmic part|GO:0005623,cell|GO:0005622,intracellular|GO:0042579,microbody|GO:0043229,intracellular organ_x0000__x0000__x0000__x0000__x0000__x0000__x0000__x0000__x0000__x0000__x0000__x0000__x0000__x0000__x0000__x0000__x0000__x0000__x0000__x0000__x00…	GO:0016614,oxidoreductase activity, acting on CH-OH group of donors|GO:0016615,malate dehydrogenase activity|GO:0016616,oxidoreductase activity, acting on the CH-OH group of donors, NAD or NADP as acceptor|GO:0003824,catalytic activity|GO:0030060,L-malate_x0000_䏻_x0000_㾀￦⸒⸒⸒槡⸒槡_x0000__x0000__x0000__x0000__x0000__x0000__x0002__x0000__x0000__x0000__xFFFF__xFFFF__x0000__x0000__x0000__x0000__x0000…	ath00630,Glyoxylate and dicarboxylate metabolism|ath00620,Pyruvate metabolism|ath00020,Citrate cycle (TCA cycle)|ath00270,Cysteine and methionine metabolism|ath00710,Carbon fixation in photosynthetic organisms|ath01200,Carbon metabolism|ath01110,Biosynthe_x0000_䉀_x0000_㾀_xFFFF__xFFFF_⸒⸒⸒槡⸒槡_x0000__x0000__x0000__x0000__x0000__x0000__x0002__x0000__x0000__x0000__xFFFF__xFFFF__x0000_㨀 㽧_x0000_㨀_x00…	http://www.uniprot.org/uniprot/O82399
297	PREDICTED: malate dehydrogenase, glyoxysomal	gi|743795553	0.2±0.05	O82399	At2g22780	GO:0034440,lipid oxidation|GO:0009894,regulation of catabolic process|GO:0044238,primary metabolic process|GO:0080090,regulation of primary metabolic process|GO:0031329,regulation of cellular catabolic process|GO:0031326,regulation of cellular biosyntheti_x0000__x0000__x0000__x0000__x0000__x0000__x0000__x0000__x0000__x0000__x0000__x0000__x0000__x0000__x0000__x0000__x0000__x0000__x0000__x0000__x00…	GO:0005737,cytoplasm|GO:0009536,plastid|GO:0043231,intracellular membrane-bounded organelle|GO:0044464,cell part|GO:0005777,peroxisome|GO:0044444,cytoplasmic part|GO:0005623,cell|GO:0005622,intracellular|GO:0042579,microbody|GO:0043229,intracellular organ_x0000__x0000__x0000__x0000__x0000__x0000__x0000__x0000__x0000__x0000__x0000__x0000__x0000__x0000__x0000__x0000__x0000__x0000__x0000__x0000__x00…	GO:0016614,oxidoreductase activity, acting on CH-OH group of donors|GO:0016615,malate dehydrogenase activity|GO:0016616,oxidoreductase activity, acting on the CH-OH group of donors, NAD or NADP as acceptor|GO:0003824,catalytic activity|GO:0030060,L-malate_x0000_䉀_x0000_㾀_xFFFF__xFFFF_⸒⸒⸒槡⸒槡_x0000__x0000__x0000__x0000__x0000__x0000__x0002__x0000__x0000__x0000__xFFFF__xFFFF__x0000_㨀 㽭_x0000_㨀_x00…	ath00630,Glyoxylate and dicarboxylate metabolism|ath00620,Pyruvate metabolism|ath00020,Citrate cycle (TCA cycle)|ath00270,Cysteine and methionine metabolism|ath00710,Carbon fixation in photosynthetic organisms|ath01200,Carbon metabolism|ath01110,Biosynthe_x0000_䉀_x0000_㾀_xFFFF__xFFFF_⸒⸒⸒槡⸒槡_x0000__x0000__x0000__x0000__x0000__x0000__x0002__x0000__x0000__x0000__xFFFF__xFFFF__x0000_㨀 㽭_x0000_㨀_x00…	http://www.uniprot.org/uniprot/O82399
596	PREDICTED: aspartate aminotransferase, cytoplasmic	gi|743814108	3.17±1.13	P46644	ASP3	GO:0022622,root system development|GO:0034440,lipid oxidation|GO:0048589,developmental growth|GO:0048588,developmental cell growth|GO:0048468,cell development|GO:0048469,cell maturation|GO:0043449,cellular alkene metabolic process|GO:0044281,small molecule metabolic process|GO:0044282,small molecule catabolic process|GO:0009693,ethylene biosynthetic process|GO:0071840,cellular component organizat…	GO:0005737,cytoplasm|GO:0009536,plastid|GO:0043231,intracellular membrane-bounded organelle|GO:0044464,cell part|GO:0005829,cytosol|GO:0016020,membrane|GO:0005777,peroxisome|GO:0044444,cytoplasmic part|GO:0005623,cell|GO:0005622,intracellular|GO:0042579,microbody|GO:0043229,intracellular organelle|GO:0044424,intracellular part|GO:0043227,membrane-bounded organelle|GO:0043226,organelle|GO:0009507,…	GO:0043168,anion binding|GO:0008483,transaminase activity|GO:0097159,organic cyclic compound binding|GO:0003824,catalytic activity|GO:0070546,L-phenylalanine aminotransferase activity|GO:1901363,heterocyclic compound binding|GO:0004069,L-aspartate:2-oxoglutarate aminotransferase activity|GO:0016740,transferase activity|GO:0048037,cofactor binding|GO:0080130,L-phenylalanine:2-oxoglutarate aminotra…	ath01230,Biosynthesis of amino acids|ath00400,Phenylalanine, tyrosine and tryptophan biosynthesis|ath00220,Arginine biosynthesis|ath00270,Cysteine and methionine metabolism|ath01210,2-Oxocarboxylic acid metabolism|ath00350,Tyrosine metabolism|ath00950,Isoquinoline alkaloid biosynthesis|ath00360,Phenylalanine metabolism|ath01100,Metabolic pathways|ath00710,Carbon fixation in photosynthetic organis…	http://www.uniprot.org/uniprot/P46644
703	PREDICTED: vacuolar protein sorting-associated protein 4B-like	gi|743832246	0.31±0.11	Q9ZNT0	SKD1	GO:0034440,lipid oxidation|GO:0008104,protein localization|GO:0048468,cell development|GO:0061025,membrane fusion|GO:0061024,membrane organization|GO:0055075,potassium ion homeostasis|GO:0044281,small molecule metabolic process|GO:0044282,small molecule catabolic process|GO:0098771,inorganic ion homeostasis|GO:0055078,sodium ion homeostasis|GO:0071840,cellular component organization or biogenesis…	GO:0005770,late endosome|GO:0043229,intracellular organelle|GO:0043227,membrane-bounded organelle|GO:0043226,organelle|GO:0030054,cell junction|GO:0010008,endosome membrane|GO:0005737,cytoplasm|GO:0031090,organelle membrane|GO:0005634,nucleus|GO:0016020,membrane|GO:0098805,whole membrane|GO:0031902,late endosome membrane|GO:0098588,bounding membrane of organelle|GO:0055044,symplast|GO:0012505,end…	GO:0035639,purine ribonucleoside triphosphate binding|GO:0005488,binding|GO:0016887,ATPase activity|GO:0043167,ion binding|GO:1901363,heterocyclic compound binding|GO:1901265,nucleoside phosphate binding|GO:0001882,nucleoside binding|GO:0043168,anion binding|GO:0042623,ATPase activity, coupled|GO:0008568,microtubule-severing ATPase activity|GO:0000166,nucleotide binding|GO:0001883,purine nucleosi…	ath04144,Endocytosis	http://www.uniprot.org/uniprot/Q9ZNT0
1028	malate dehydrogenase family protein	gi|224056321	0.5±0.04	O82399	At2g22780	GO:0034440,lipid oxidation|GO:0009894,regulation of catabolic process|GO:0044238,primary metabolic process|GO:0080090,regulation of primary metabolic process|GO:0031329,regulation of cellular catabolic process|GO:0031326,regulation of cellular biosynthetic process|GO:0031323,regulation of cellular metabolic process|GO:0006631,fatty acid metabolic process|GO:0019752,carboxylic acid metabolic proce…	GO:0005737,cytoplasm|GO:0009536,plastid|GO:0043231,intracellular membrane-bounded organelle|GO:0044464,cell part|GO:0005777,peroxisome|GO:0044444,cytoplasmic part|GO:0005623,cell|GO:0005622,intracellular|GO:0042579,microbody|GO:0043229,intracellular organelle|GO:0044424,intracellular part|GO:0009514,glyoxysome|GO:0043227,membrane-bounded organelle|GO:0043226,organelle|GO:0009507,chloroplast	GO:0016614,oxidoreductase activity, acting on CH-OH group of donors|GO:0016615,malate dehydrogenase activity|GO:0016616,oxidoreductase activity, acting on the CH-OH group of donors, NAD or NADP as acceptor|GO:0003824,catalytic activity|GO:0030060,L-malate dehydrogenase activity|GO:0016491,oxidoreductase activity	ath00630,Glyoxylate and dicarboxylate metabolism|ath00620,Pyruvate metabolism|ath00020,Citrate cycle (TCA cycle)|ath00270,Cysteine and methionine metabolism|ath00710,Carbon fixation in photosynthetic organisms|ath01200,Carbon metabolism|ath01110,Biosynthesis of secondary metabolites|ath01100,Metabolic pathways	http://www.uniprot.org/uniprot/O82399
	oxidation-reduction process
9	PSII CP47 chlorophyll apoprotein	gi|705245225	0.14±0.02	P56777	psbB	GO:0006091,generation of precursor metabolites and energy|GO:0015979,photosynthesis|GO:0044699,single-organism process|GO:0044267,cellular protein metabolic process|GO:0044710,single-organism metabolic process|GO:0044260,cellular macromolecule metabolic process|GO:0019684,photosynthesis, light reaction|GO:0009772,photosynthetic electron transport in photosystem II|GO:0071704,organic substance met…	GO:0055035,plastid thylakoid membrane|GO:0034357,photosynthetic membrane|GO:0031976,plastid thylakoid|GO:0043229,intracellular organelle|GO:0005622,intracellular|GO:0043227,membrane-bounded organelle|GO:0043226,organelle|GO:0031224,intrinsic component of membrane|GO:0009535,chloroplast thylakoid membrane|GO:0009534,chloroplast thylakoid|GO:0031984,organelle subcompartment|GO:0016021,integral comp…	GO:0016168,chlorophyll binding|GO:0046906,tetrapyrrole binding|GO:0097159,organic cyclic compound binding|GO:0005488,binding|GO:0045156,electron transporter, transferring electrons within the cyclic electron transport pathway of photosynthesis activity|GO:1901363,heterocyclic compound binding|GO:0009055,electron carrier activity	ath00195,Photosynthesis|ath01100,Metabolic pathways	http://www.uniprot.org/uniprot/P56777
10	photosystem II CP43 chlorophyll apoprotein (chloroplast)	gi|705245198	0.09±0.01	P56778	psbC	GO:0006091,generation of precursor metabolites and energy|GO:0015979,photosynthesis|GO:0044699,single-organism process|GO:0044267,cellular protein metabolic process|GO:0044710,single-organism metabolic process|GO:0044260,cellular macromolecule metabolic process|GO:0019684,photosynthesis, light reaction|GO:0009772,photosynthetic electron transport in photosystem II|GO:0071704,organic substance met…	GO:0055035,plastid thylakoid membrane|GO:0034357,photosynthetic membrane|GO:0031976,plastid thylakoid|GO:0043229,intracellular organelle|GO:0005622,intracellular|GO:0043227,membrane-bounded organelle|GO:0043226,organelle|GO:0031224,intrinsic component of membrane|GO:0009535,chloroplast thylakoid membrane|GO:0009534,chloroplast thylakoid|GO:0031984,organelle subcompartment|GO:0016021,integral comp…	GO:0043169,cation binding|GO:0016168,chlorophyll binding|GO:0046906,tetrapyrrole binding|GO:0097159,organic cyclic compound binding|GO:0043167,ion binding|GO:0005488,binding|GO:0045156,electron transporter, transferring electrons within the cyclic electron transport pathway of photosynthesis activity|GO:0046872,metal ion binding|GO:1901363,heterocyclic compound binding|GO:0009055,electron carrier…	ath00195,Photosynthesis|ath01100,Metabolic pathways	http://www.uniprot.org/uniprot/P56778
40	photosystem I P700 apoprotein A2 (chloroplast)	gi|705245201	0.3±0.03	P56767	psaB	GO:0044267,cellular protein metabolic process|GO:0044710,single-organism metabolic process|GO:0044260,cellular macromolecule metabolic process|GO:0044238,primary metabolic process|GO:0019538,protein metabolic process|GO:0044237,cellular metabolic process|GO:0009987,cellular process|GO:0055114,oxidation-reduction process|GO:0018298,protein-chromophore linkage|GO:0043170,macromolecule metabolic pro…	GO:0055035,plastid thylakoid membrane|GO:0034357,photosynthetic membrane|GO:0031976,plastid thylakoid|GO:0043229,intracellular organelle|GO:0005622,intracellular|GO:0043227,membrane-bounded organelle|GO:0043226,organelle|GO:0031224,intrinsic component of membrane|GO:0009535,chloroplast thylakoid membrane|GO:0009534,chloroplast thylakoid|GO:0031984,organelle subcompartment|GO:0016021,integral comp…	GO:0043169,cation binding|GO:0016168,chlorophyll binding|GO:0051539,4 iron, 4 sulfur cluster binding|GO:0046906,tetrapyrrole binding|GO:0097159,organic cyclic compound binding|GO:0051536,iron-sulfur cluster binding|GO:0000287,magnesium ion binding|GO:0043167,ion binding|GO:0003824,catalytic activity|GO:0005488,binding|GO:0009055,electron carrier activity|GO:0051540,metal cluster binding|GO:004687…	ath00195,Photosynthesis|ath01100,Metabolic pathways	http://www.uniprot.org/uniprot/P56767
41	PREDICTED: oxygen-evolving enhancer protein 1, chloroplastic	gi|743921083	0.12±0.01	Q9S841	PSBO2	GO:0008104,protein localization|GO:0019220,regulation of phosphate metabolic process|GO:0080090,regulation of primary metabolic process|GO:0019222,regulation of metabolic process|GO:0019682,glyceraldehyde-3-phosphate metabolic process|GO:0048585,negative regulation of response to stimulus|GO:0051667,establishment of plastid localization|GO:0048583,regulation of response to stimulus|GO:0031348,neg…	GO:0055035,plastid thylakoid membrane|GO:0034357,photosynthetic membrane|GO:0031976,plastid thylakoid|GO:0031977,thylakoid lumen|GO:0019898,extrinsic component of membrane|GO:0043229,intracellular organelle|GO:0005622,intracellular|GO:0009654,photosystem II oxygen evolving complex|GO:0043226,organelle|GO:0031224,intrinsic component of membrane|GO:0009535,chloroplast thylakoid membrane|GO:0009534,…	GO:0005488,binding|GO:0043169,cation binding|GO:0005515,protein binding|GO:0097159,organic cyclic compound binding|GO:0043167,ion binding|GO:0008266,poly(U) RNA binding|GO:0003727,single-stranded RNA binding|GO:0003723,RNA binding|GO:0003676,nucleic acid binding|GO:0008187,poly-pyrimidine tract binding|GO:0046872,metal ion binding|GO:1901363,heterocyclic compound binding|GO:0005509,calcium ion bi…	ath00195,Photosynthesis|ath01100,Metabolic pathways	http://www.uniprot.org/uniprot/Q9S841
42	PREDICTED: glyceraldehyde-3-phosphate dehydrogenase B, chloroplastic isoform X1	gi|743875087	0.32±0.03	P25857	GAPB	GO:0019685,photosynthesis, dark reaction|GO:0080090,regulation of primary metabolic process|GO:0019222,regulation of metabolic process|GO:0051049,regulation of transport|GO:0006778,porphyrin-containing compound metabolic process|GO:0006779,porphyrin-containing compound biosynthetic process|GO:0009409,response to cold|GO:0015977,carbon fixation|GO:0044281,small molecule metabolic process|GO:000963…	GO:0055035,plastid thylakoid membrane|GO:0034357,photosynthetic membrane|GO:0031976,plastid thylakoid|GO:0031975,envelope|GO:0048046,apoplast|GO:0043229,intracellular organelle|GO:0042170,plastid membrane|GO:0005622,intracellular|GO:0043227,membrane-bounded organelle|GO:0043226,organelle|GO:0009535,chloroplast thylakoid membrane|GO:0009534,chloroplast thylakoid|GO:0031984,organelle subcompartment…	GO:0050662,coenzyme binding|GO:0004365,glyceraldehyde-3-phosphate dehydrogenase (NAD+) (phosphorylating) activity|GO:0051287,NAD binding|GO:1901363,heterocyclic compound binding|GO:0043891,glyceraldehyde-3-phosphate dehydrogenase (NAD(P)+) (phosphorylating) activity|GO:0016620,oxidoreductase activity, acting on the aldehyde or oxo group of donors, NAD or NADP as acceptor|GO:0036094,small molecule…	ath00710,Carbon fixation in photosynthetic organisms|ath01100,Metabolic pathways|ath01200,Carbon metabolism	http://www.uniprot.org/uniprot/P25857
54	PREDICTED: ATP synthase subunit alpha, mitochondrial	gi|743900113	2.61±0.5	P92549	ATPA	GO:0009167,purine ribonucleoside monophosphate metabolic process|GO:0009165,nucleotide biosynthetic process|GO:0009163,nucleoside biosynthetic process|GO:0009161,ribonucleoside monophosphate metabolic process|GO:1901362,organic cyclic compound biosynthetic process|GO:0042451,purine nucleoside biosynthetic process|GO:0009168,purine ribonucleoside monophosphate biosynthetic process|GO:0044710,singl…	GO:0044464,cell part|GO:0031975,envelope|GO:0043229,intracellular organelle|GO:0043227,membrane-bounded organelle|GO:0043226,organelle|GO:0045261,proton-transporting ATP synthase complex, catalytic core F(1)|GO:0044446,intracellular organelle part|GO:0031090,organelle membrane|GO:0005743,mitochondrial inner membrane|GO:0016020,membrane|GO:0044444,cytoplasmic part|GO:0005739,mitochondrion|GO:00057…	GO:0035639,purine ribonucleoside triphosphate binding|GO:0036442,hydrogen-exporting ATPase activity|GO:0005488,binding|GO:0016887,ATPase activity|GO:0043167,ion binding|GO:1901363,heterocyclic compound binding|GO:0032550,purine ribonucleoside binding|GO:0001882,nucleoside binding|GO:0043168,anion binding|GO:0042625,ATPase activity, coupled to transmembrane movement of ions|GO:0042626,ATPase activ…	ath00190,Oxidative phosphorylation|ath01100,Metabolic pathways	http://www.uniprot.org/uniprot/P92549
66	PREDICTED: glycerate dehydrogenase	gi|743906507	0.4±0.04	Q9C9W5	HPR	GO:0042221,response to chemical|GO:0009991,response to extracellular stimulus|GO:0071482,cellular response to light stimulus|GO:0009414,response to water deprivation|GO:0009314,response to radiation|GO:0071229,cellular response to acid chemical|GO:0044249,cellular biosynthetic process|GO:0009416,response to light stimulus|GO:0070887,cellular response to chemical stimulus|GO:0009415,response to wa…	GO:0005737,cytoplasm|GO:0043231,intracellular membrane-bounded organelle|GO:0044464,cell part|GO:0005777,peroxisome|GO:0044444,cytoplasmic part|GO:0005623,cell|GO:0005622,intracellular|GO:0042579,microbody|GO:0043229,intracellular organelle|GO:0044424,intracellular part|GO:0043227,membrane-bounded organelle|GO:0043226,organelle	GO:0050662,coenzyme binding|GO:0016614,oxidoreductase activity, acting on CH-OH group of donors|GO:0016616,oxidoreductase activity, acting on the CH-OH group of donors, NAD or NADP as acceptor|GO:0051287,NAD binding|GO:1901363,heterocyclic compound binding|GO:0000166,nucleotide binding|GO:0036094,small molecule binding|GO:0003824,catalytic activity|GO:0048037,cofactor binding|GO:0005488,binding|G…	ath00630,Glyoxylate and dicarboxylate metabolism|ath01110,Biosynthesis of secondary metabolites|ath00260,Glycine, serine and threonine metabolism|ath01100,Metabolic pathways|ath01200,Carbon metabolism	http://www.uniprot.org/uniprot/Q9C9W5
89	PREDICTED: sedoheptulose-1,7-bisphosphatase, chloroplastic	gi|743879686	0.19±0.05	P46283	At3g55800	GO:0009595,detection of biotic stimulus|GO:0006520,cellular amino acid metabolic process|GO:0019220,regulation of phosphate metabolic process|GO:0080090,regulation of primary metabolic process|GO:0019222,regulation of metabolic process|GO:0006470,protein dephosphorylation|GO:0048585,negative regulation of response to stimulus|GO:0048583,regulation of response to stimulus|GO:0031348,negative regul…	GO:0031975,envelope|GO:0048046,apoplast|GO:0043229,intracellular organelle|GO:0043227,membrane-bounded organelle|GO:0043226,organelle|GO:0005737,cytoplasm|GO:0009941,chloroplast envelope|GO:0009536,plastid|GO:0009532,plastid stroma|GO:0009570,chloroplast stroma|GO:0044435,plastid part|GO:0044434,chloroplast part|GO:0009579,thylakoid|GO:0031967,organelle envelope|GO:0009507,chloroplast|GO:0009526,…	GO:0050308,sugar-phosphatase activity|GO:0019203,carbohydrate phosphatase activity|GO:0042132,fructose 1,6-bisphosphate 1-phosphatase activity|GO:0016791,phosphatase activity|GO:0016787,hydrolase activity|GO:0043169,cation binding|GO:0016788,hydrolase activity, acting on ester bonds|GO:0043167,ion binding|GO:0042578,phosphoric ester hydrolase activity|GO:0003824,catalytic activity|GO:0005488,bind…	ath00710,Carbon fixation in photosynthetic organisms|ath01100,Metabolic pathways|ath01200,Carbon metabolism	http://www.uniprot.org/uniprot/P46283
93	PREDICTED: ATP synthase gamma chain, chloroplastic	gi|743885735	0.41±0.07	Q01908	ATPC1	GO:0019220,regulation of phosphate metabolic process|GO:0080090,regulation of primary metabolic process|GO:0019222,regulation of metabolic process|GO:0019682,glyceraldehyde-3-phosphate metabolic process|GO:1901575,organic substance catabolic process|GO:0006778,porphyrin-containing compound metabolic process|GO:0006779,porphyrin-containing compound biosynthetic process|GO:0009694,jasmonic acid met…	GO:0055035,plastid thylakoid membrane|GO:0034357,photosynthetic membrane|GO:0031976,plastid thylakoid|GO:0031975,envelope|GO:0043229,intracellular organelle|GO:0009579,thylakoid|GO:0043227,membrane-bounded organelle|GO:0043226,organelle|GO:0009535,chloroplast thylakoid membrane|GO:0009534,chloroplast thylakoid|GO:0031984,organelle subcompartment|GO:0098807,chloroplast thylakoid membrane protein c…	GO:0036442,hydrogen-exporting ATPase activity|GO:0016887,ATPase activity|GO:0098772,molecular function regulator|GO:0042625,ATPase activity, coupled to transmembrane movement of ions|GO:0042626,ATPase activity, coupled to transmembrane movement of substances|GO:0016820,hydrolase activity, acting on acid anhydrides, catalyzing transmembrane movement of substances|GO:0046933,proton-transporting ATP…	ath00190,Oxidative phosphorylation|ath00195,Photosynthesis|ath01100,Metabolic pathways	http://www.uniprot.org/uniprot/Q01908
95	PREDICTED: catalase isozyme 1	gi|743895899	0.38±0.06	P25819	CAT2	GO:0019725,cellular homeostasis|GO:0009991,response to extracellular stimulus|GO:0009628,response to abiotic stimulus|GO:0008152,metabolic process|GO:0009314,response to radiation|GO:0009648,photoperiodism|GO:0031667,response to nutrient levels|GO:0042592,homeostatic process|GO:0042744,hydrogen peroxide catabolic process|GO:0042743,hydrogen peroxide metabolic process|GO:0042594,response to starva…	GO:0022626,cytosolic ribosome|GO:0031975,envelope|GO:0042579,microbody|GO:0043229,intracellular organelle|GO:0043228,non-membrane-bounded organelle|GO:0009514,glyoxysome|GO:0043227,membrane-bounded organelle|GO:0043226,organelle|GO:0005737,cytoplasm|GO:0009536,plastid|GO:0010319,stromule|GO:0005777,peroxisome|GO:0005739,mitochondrion|GO:0030529,ribonucleoprotein complex|GO:0044435,plastid part|GO…	GO:0043169,cation binding|GO:0043167,ion binding|GO:0046872,metal ion binding|GO:0046914,transition metal ion binding|GO:0020037,heme binding|GO:0046906,tetrapyrrole binding|GO:0097159,organic cyclic compound binding|GO:0016209,antioxidant activity|GO:0050897,cobalt ion binding|GO:1901363,heterocyclic compound binding|GO:0003824,catalytic activity|GO:0005488,binding|GO:0005515,protein binding|GO:…	ath00630,Glyoxylate and dicarboxylate metabolism|ath04146,Peroxisome|ath01110,Biosynthesis of secondary metabolites|ath00380,Tryptophan metabolism|ath01200,Carbon metabolism	http://www.uniprot.org/uniprot/P25819
99	photosystem II protein D1 (chloroplast)	gi|705245186	0.15±0.01	P83755	psbA	GO:0006091,generation of precursor metabolites and energy|GO:0009635,response to herbicide|GO:0015979,photosynthesis|GO:0044699,single-organism process|GO:0044267,cellular protein metabolic process|GO:0044710,single-organism metabolic process|GO:0044260,cellular macromolecule metabolic process|GO:0019684,photosynthesis, light reaction|GO:0009636,response to toxic substance|GO:0009772,photosynthet…	GO:0055035,plastid thylakoid membrane|GO:0034357,photosynthetic membrane|GO:0031976,plastid thylakoid|GO:0043229,intracellular organelle|GO:0005622,intracellular|GO:0043227,membrane-bounded organelle|GO:0043226,organelle|GO:0031224,intrinsic component of membrane|GO:0009535,chloroplast thylakoid membrane|GO:0009534,chloroplast thylakoid|GO:0031984,organelle subcompartment|GO:0016021,integral comp…	GO:0043169,cation binding|GO:0016168,chlorophyll binding|GO:0009055,electron carrier activity|GO:0046914,transition metal ion binding|GO:0046906,tetrapyrrole binding|GO:0097159,organic cyclic compound binding|GO:0010242,oxygen evolving activity|GO:0043167,ion binding|GO:0003824,catalytic activity|GO:0005488,binding|GO:0005515,protein binding|GO:0045156,electron transporter, transferring electrons…	ath00195,Photosynthesis|ath01100,Metabolic pathways	http://www.uniprot.org/uniprot/P83755
100	PREDICTED: magnesium-protoporphyrin IX monomethyl ester oxidative cyclase, chloroplastic	gi|743894862	0.33±0.14	Q9M591	CRD1	GO:0080090,regulation of primary metabolic process|GO:0019222,regulation of metabolic process|GO:0006778,porphyrin-containing compound metabolic process|GO:0006779,porphyrin-containing compound biosynthetic process|GO:0061024,membrane organization|GO:0044281,small molecule metabolic process|GO:0044283,small molecule biosynthetic process|GO:1901576,organic substance biosynthetic process|GO:1901362…	GO:0055035,plastid thylakoid membrane|GO:0019866,organelle inner membrane|GO:0034357,photosynthetic membrane|GO:0031976,plastid thylakoid|GO:0031975,envelope|GO:0043229,intracellular organelle|GO:0042170,plastid membrane|GO:0005623,cell|GO:0005622,intracellular|GO:0043227,membrane-bounded organelle|GO:0043226,organelle|GO:0009535,chloroplast thylakoid membrane|GO:0009534,chloroplast thylakoid|GO:…	GO:0043169,cation binding|GO:0004497,monooxygenase activity|GO:0005515,protein binding|GO:0016709,oxidoreductase activity, acting on paired donors, with incorporation or reduction of molecular oxygen, NAD(P)H as one donor, and incorporation of one atom of oxygen|GO:0097159,organic cyclic compound binding|GO:0016705,oxidoreductase activity, acting on paired donors, with incorporation or reduction …	ath00860,Porphyrin and chlorophyll metabolism|ath01110,Biosynthesis of secondary metabolites|ath01100,Metabolic pathways	http://www.uniprot.org/uniprot/Q9M591
132	photosystem I subunit VII (chloroplast)	gi|705245249	0.24±0.02	P62090	psaC	GO:0044710,single-organism metabolic process|GO:0019684,photosynthesis, light reaction|GO:0009987,cellular process|GO:0044237,cellular metabolic process|GO:0022900,electron transport chain|GO:0044763,single-organism cellular process|GO:0044699,single-organism process|GO:0008152,metabolic process|GO:0006091,generation of precursor metabolites and energy|GO:0009773,photosynthetic electron transport…	GO:0055035,plastid thylakoid membrane|GO:0034357,photosynthetic membrane|GO:0031976,plastid thylakoid|GO:0043229,intracellular organelle|GO:0005622,intracellular|GO:0043227,membrane-bounded organelle|GO:0043226,organelle|GO:0009535,chloroplast thylakoid membrane|GO:0009534,chloroplast thylakoid|GO:0031984,organelle subcompartment|GO:0016020,membrane|GO:0044436,thylakoid part|GO:0044435,plastid pa…	GO:0016491,oxidoreductase activity|GO:0043169,cation binding|GO:0051540,metal cluster binding|GO:0051536,iron-sulfur cluster binding|GO:0043167,ion binding|GO:0003824,catalytic activity|GO:0005488,binding|GO:0009055,electron carrier activity|GO:0046872,metal ion binding|GO:0051539,4 iron, 4 sulfur cluster binding	ath00195,Photosynthesis|ath01100,Metabolic pathways	http://www.uniprot.org/uniprot/P62090
153	PREDICTED: oxygen-evolving enhancer protein 2, chloroplastic-like	gi|743840443	0.12±0.01	Q42029	PSBP1	GO:0009595,detection of biotic stimulus|GO:0008104,protein localization|GO:0019222,regulation of metabolic process|GO:0051049,regulation of transport|GO:0048585,negative regulation of response to stimulus|GO:0048583,regulation of response to stimulus|GO:0031348,negative regulation of defense response|GO:0009696,salicylic acid metabolic process|GO:0009697,salicylic acid biosynthetic process|GO:000…	GO:0031978,plastid thylakoid lumen|GO:0055035,plastid thylakoid membrane|GO:0034357,photosynthetic membrane|GO:0031976,plastid thylakoid|GO:0031977,thylakoid lumen|GO:0019898,extrinsic component of membrane|GO:0048046,apoplast|GO:0043229,intracellular organelle|GO:0009579,thylakoid|GO:0043227,membrane-bounded organelle|GO:0043226,organelle|GO:0009535,chloroplast thylakoid membrane|GO:0009534,chlo…	GO:0005488,binding|GO:0043169,cation binding|GO:0097159,organic cyclic compound binding|GO:0043167,ion binding|GO:0008266,poly(U) RNA binding|GO:0003727,single-stranded RNA binding|GO:0003723,RNA binding|GO:0003676,nucleic acid binding|GO:0008187,poly-pyrimidine tract binding|GO:0046872,metal ion binding|GO:1901363,heterocyclic compound binding|GO:0005509,calcium ion binding	ath00195,Photosynthesis|ath01100,Metabolic pathways	http://www.uniprot.org/uniprot/Q42029
176	PREDICTED: malate dehydrogenase, glyoxysomal	gi|743822923	0.22±0.1	O82399	At2g22780	GO:0034440,lipid oxidation|GO:0009894,regulation of catabolic process|GO:0044238,primary metabolic process|GO:0080090,regulation of primary metabolic process|GO:0031329,regulation of cellular catabolic process|GO:0031326,regulation of cellular biosyntheti_x0000__x0000__x0000__x0000__x0000__x0000__x0000__x0000__x0000__x0000__x0000__x0000__x0000__x0000__x0000__x0000__x0000__x0000__x0000__x0000__x00…	GO:0005737,cytoplasm|GO:0009536,plastid|GO:0043231,intracellular membrane-bounded organelle|GO:0044464,cell part|GO:0005777,peroxisome|GO:0044444,cytoplasmic part|GO:0005623,cell|GO:0005622,intracellular|GO:0042579,microbody|GO:0043229,intracellular organ_x0000__x0000__x0000__x0000__x0000__x0000__x0000__x0000__x0000__x0000__x0000__x0000__x0000__x0000__x0000__x0000__x0000__x0000__x0000__x0000__x00…	GO:0016614,oxidoreductase activity, acting on CH-OH group of donors|GO:0016615,malate dehydrogenase activity|GO:0016616,oxidoreductase activity, acting on the CH-OH group of donors, NAD or NADP as acceptor|GO:0003824,catalytic activity|GO:0030060,L-malate_x0000_䏻_x0000_㾀￦⸒⸒⸒槡⸒槡_x0000__x0000__x0000__x0000__x0000__x0000__x0002__x0000__x0000__x0000__xFFFF__xFFFF__x0000__x0000__x0000__x0000__x0000…	ath00630,Glyoxylate and dicarboxylate metabolism|ath00620,Pyruvate metabolism|ath00020,Citrate cycle (TCA cycle)|ath00270,Cysteine and methionine metabolism|ath00710,Carbon fixation in photosynthetic organisms|ath01200,Carbon metabolism|ath01110,Biosynthe_x0000_䉀_x0000_㾀_xFFFF__xFFFF_⸒⸒⸒槡⸒槡_x0000__x0000__x0000__x0000__x0000__x0000__x0002__x0000__x0000__x0000__xFFFF__xFFFF__x0000_㨀 㽧_x0000_㨀_x00…	http://www.uniprot.org/uniprot/O82399
180	peroxiredoxin Q family protein	gi|566176289	0.46±0.11	Q9LU86	PRXQ	GO:0008152,metabolic process|GO:0044710,single-organism metabolic process|GO:0044699,single-organism process|GO:0055114,oxidation-reduction process	GO:0031978,plastid thylakoid lumen|GO:0031976,plastid thylakoid|GO:0031977,thylakoid lumen|GO:0043229,intracellular organelle|GO:0005622,intracellular|GO:0043227,membrane-bounded organelle|GO:0043226,organelle|GO:0009579,thylakoid|GO:0009534,chloroplast thylakoid|GO:0031984,organelle subcompartment|GO:0009532,plastid stroma|GO:0009570,chloroplast stroma|GO:0044436,thylakoid part|GO:0044435,plasti…	GO:0016209,antioxidant activity|GO:0051920,peroxiredoxin activity|GO:0003824,catalytic activity|GO:0005488,binding|GO:0005515,protein binding|GO:0016684,oxidoreductase activity, acting on peroxide as acceptor|GO:0004601,peroxidase activity|GO:0016491,oxidoreductase activity		http://www.uniprot.org/uniprot/Q9LU86
183	PREDICTED: 50S ribosomal protein L11, chloroplastic	gi|743894715	0.31±0.02	Q9MAP3	RPL11	GO:0006778,porphyrin-containing compound metabolic process|GO:0006779,porphyrin-containing compound biosynthetic process|GO:0061024,membrane organization|GO:0044281,small molecule metabolic process|GO:1901362,organic cyclic compound biosynthetic process|GO:1901360,organic cyclic compound metabolic process|GO:0044710,single-organism metabolic process|GO:0044711,single-organism biosynthetic process…	GO:0022626,cytosolic ribosome|GO:0031975,envelope|GO:0043229,intracellular organelle|GO:0043228,non-membrane-bounded organelle|GO:0043227,membrane-bounded organelle|GO:0043226,organelle|GO:0005737,cytoplasm|GO:0009941,chloroplast envelope|GO:0009536,plastid|GO:0009532,plastid stroma|GO:0009570,chloroplast stroma|GO:0016020,membrane|GO:0030529,ribonucleoprotein complex|GO:0044435,plastid part|GO:0…	GO:0097159,organic cyclic compound binding|GO:0019843,rRNA binding|GO:0003735,structural constituent of ribosome|GO:0003723,RNA binding|GO:0003676,nucleic acid binding|GO:0005198,structural molecule activity|GO:1901363,heterocyclic compound binding|GO:0005488,binding	ath03010,Ribosome	http://www.uniprot.org/uniprot/Q9MAP3
184	alcohol-dehydrogenase family protein	gi|566179485	2.93±1.4	Q96533	ADH2	GO:0044710,single-organism metabolic process|GO:0071704,organic substance metabolic process|GO:0044699,single-organism process|GO:0006066,alcohol metabolic process|GO:0006067,ethanol metabolic process|GO:0044281,small molecule metabolic process|GO:0008152,metabolic process|GO:0034308,primary alcohol metabolic process|GO:1901615,organic hydroxy compound metabolic process|GO:0055114,oxidation-reduc…	GO:0005737,cytoplasm|GO:0044464,cell part|GO:0005623,cell|GO:0005622,intracellular|GO:0044424,intracellular part	GO:0005488,binding|GO:0043169,cation binding|GO:0016614,oxidoreductase activity, acting on CH-OH group of donors|GO:0046914,transition metal ion binding|GO:0016616,oxidoreductase activity, acting on the CH-OH group of donors, NAD or NADP as acceptor|GO:0004022,alcohol dehydrogenase (NAD) activity|GO:0043167,ion binding|GO:0003824,catalytic activity|GO:0008270,zinc ion binding|GO:0051903,S-(hydrox…	ath00350,Tyrosine metabolism|ath00010,Glycolysis / Gluconeogenesis|ath01200,Carbon metabolism|ath00071,Fatty acid degradation|ath01110,Biosynthesis of secondary metabolites|ath01100,Metabolic pathways	http://www.uniprot.org/uniprot/Q96533
210	PREDICTED: uncharacterized protein LOC105123107	gi|743819545	2.03±0.56	Q9LYR4	T22N19_70	GO:0009167,purine ribonucleoside monophosphate metabolic process|GO:0044281,small molecule metabolic process|GO:0009161,ribonucleoside monophosphate metabolic process|GO:0009698,phenylpropanoid metabolic process|GO:0009699,phenylpropanoid biosynthetic process|GO:1901360,organic cyclic compound metabolic process|GO:0044712,single-organism catabolic process|GO:0044710,single-organism metabolic proc…	GO:0005737,cytoplasm|GO:0009536,plastid|GO:0043231,intracellular membrane-bounded organelle|GO:0009532,plastid stroma|GO:0009570,chloroplast stroma|GO:0005829,cytosol|GO:0044464,cell part|GO:0044444,cytoplasmic part|GO:0005739,mitochondrion|GO:0005622,intracellular|GO:0044446,intracellular organelle part|GO:0043229,intracellular organelle|GO:0005623,cell|GO:0044435,plastid part|GO:0044434,chlorop…	GO:0003824,catalytic activity|GO:0016740,transferase activity|GO:0004801,sedoheptulose-7-phosphate:D-glyceraldehyde-3-phosphate glyceronetransferase activity|GO:0016744,transferase activity, transferring aldehyde or ketonic groups	ath00030,Pentose phosphate pathway|ath01230,Biosynthesis of amino acids|ath01100,Metabolic pathways|ath01200,Carbon metabolism|ath01110,Biosynthesis of secondary metabolites	http://www.uniprot.org/uniprot/Q9LYR4
214	hypothetical protein POPTR_0008s01000g	gi|224100535	3.6±0.61	O04130	PGDH2	GO:0019752,carboxylic acid metabolic process|GO:0044249,cellular biosynthetic process|GO:0006807,nitrogen compound metabolic process|GO:0044281,small molecule metabolic process|GO:0044283,small molecule biosynthetic process|GO:0009069,serine family amino acid metabolic process|GO:0044699,single-organism process|GO:1901576,organic substance biosynthetic process|GO:0044710,single-organism metabolic…	GO:0005737,cytoplasm|GO:0009536,plastid|GO:0043231,intracellular membrane-bounded organelle|GO:0044464,cell part|GO:0044444,cytoplasmic part|GO:0005623,cell|GO:0005622,intracellular|GO:0043229,intracellular organelle|GO:0044424,intracellular part|GO:0043227,membrane-bounded organelle|GO:0043226,organelle|GO:0009507,chloroplast	GO:0043168,anion binding|GO:0050662,coenzyme binding|GO:0016614,oxidoreductase activity, acting on CH-OH group of donors|GO:0016616,oxidoreductase activity, acting on the CH-OH group of donors, NAD or NADP as acceptor|GO:0043177,organic acid binding|GO:0051287,NAD binding|GO:0031406,carboxylic acid binding|GO:0000166,nucleotide binding|GO:0036094,small molecule binding|GO:0003824,catalytic activi…	ath00260,Glycine, serine and threonine metabolism|ath01100,Metabolic pathways|ath01200,Carbon metabolism|ath01230,Biosynthesis of amino acids	http://www.uniprot.org/uniprot/O04130
218	PREDICTED: enoyl-acyl-carrier-protein, reductase NADH , chloroplastic-like	gi|743886684	2.24±1.42	Q9SLA8	MOD1	GO:0006633,fatty acid biosynthetic process|GO:0006631,fatty acid metabolic process|GO:0009628,response to abiotic stimulus|GO:0016131,brassinosteroid metabolic process|GO:0051234,establishment of localization|GO:0016132,brassinosteroid biosynthetic process|GO:0006732,coenzyme metabolic process|GO:0051186,cofactor metabolic process|GO:0019752,carboxylic acid metabolic process|GO:0044249,cellular b…	GO:0031975,envelope|GO:0043229,intracellular organelle|GO:0005622,intracellular|GO:0043227,membrane-bounded organelle|GO:0043226,organelle|GO:0009579,thylakoid|GO:0009941,chloroplast envelope|GO:0009536,plastid|GO:0009532,plastid stroma|GO:0009570,chloroplast stroma|GO:0044435,plastid part|GO:0044434,chloroplast part|GO:0043234,protein complex|GO:0031967,organelle envelope|GO:0009507,chloroplast|…	GO:0005488,binding|GO:0043169,cation binding|GO:0046872,metal ion binding|GO:0016628,oxidoreductase activity, acting on the CH-CH group of donors, NAD or NADP as acceptor|GO:0046914,transition metal ion binding|GO:0043167,ion binding|GO:0016627,oxidoreductase activity, acting on the CH-CH group of donors|GO:0016631,enoyl-[acyl-carrier-protein] reductase activity|GO:0004312,fatty acid synthase act…	ath00061,Fatty acid biosynthesis|ath00780,Biotin metabolism|ath01212,Fatty acid metabolism|ath01100,Metabolic pathways	http://www.uniprot.org/uniprot/Q9SLA8
223	hypothetical protein POPTR_0009s14500g	gi|566187985	0.48±0.04	Q1H537	DVR	GO:0080090,regulation of primary metabolic process|GO:0019222,regulation of metabolic process|GO:0019682,glyceraldehyde-3-phosphate metabolic process|GO:0006778,porphyrin-containing compound metabolic process|GO:0006779,porphyrin-containing compound biosynthetic process|GO:0044281,small molecule metabolic process|GO:0044283,small molecule biosynthetic process|GO:1901362,organic cyclic compound bi…	GO:0031976,plastid thylakoid|GO:0031975,envelope|GO:0043229,intracellular organelle|GO:0043227,membrane-bounded organelle|GO:0043226,organelle|GO:0005737,cytoplasm|GO:0009534,chloroplast thylakoid|GO:0031984,organelle subcompartment|GO:0016020,membrane|GO:0044435,plastid part|GO:0044434,chloroplast part|GO:0009579,thylakoid|GO:0009941,chloroplast envelope|GO:0031967,organelle envelope|GO:0009536,…	GO:0016628,oxidoreductase activity, acting on the CH-CH group of donors, NAD or NADP as acceptor|GO:0016627,oxidoreductase activity, acting on the CH-CH group of donors|GO:0033728,divinyl chlorophyllide a 8-vinyl-reductase activity|GO:0003824,catalytic activity|GO:0051744,3,8-divinyl protochlorophyllide a 8-vinyl reductase activity|GO:0016491,oxidoreductase activity	ath00860,Porphyrin and chlorophyll metabolism|ath01110,Biosynthesis of secondary metabolites|ath01100,Metabolic pathways	http://www.uniprot.org/uniprot/Q1H537
224	PREDICTED: pyruvate dehydrogenase E1 component subunit alpha, mitochondrial-like	gi|743924958	3.1±0.27	P52901	E1 ALPHA	GO:0009185,ribonucleoside diphosphate metabolic process|GO:0010035,response to inorganic substance|GO:0010038,response to metal ion|GO:0006732,coenzyme metabolic process|GO:0009141,nucleoside triphosphate metabolic process|GO:0009144,purine nucleoside triphosphate metabolic process|GO:0019752,carboxylic acid metabolic process|GO:0044723,single-organism carbohydrate metabolic process|GO:0034641,ce…	GO:0005737,cytoplasm|GO:0005829,cytosol|GO:0043231,intracellular membrane-bounded organelle|GO:0043233,organelle lumen|GO:0005634,nucleus|GO:0044464,cell part|GO:0044444,cytoplasmic part|GO:0031974,membrane-enclosed lumen|GO:0005622,intracellular|GO:0044446,intracellular organelle part|GO:0070013,intracellular organelle lumen|GO:0043229,intracellular organelle|GO:0005739,mitochondrion|GO:0044429,…	GO:0004738,pyruvate dehydrogenase activity|GO:0004739,pyruvate dehydrogenase (acetyl-transferring) activity|GO:0016624,oxidoreductase activity, acting on the aldehyde or oxo group of donors, disulfide as acceptor|GO:0003824,catalytic activity|GO:0016903,oxidoreductase activity, acting on the aldehyde or oxo group of donors|GO:0016491,oxidoreductase activity	ath00620,Pyruvate metabolism|ath00020,Citrate cycle (TCA cycle)|ath00010,Glycolysis / Gluconeogenesis|ath01200,Carbon metabolism|ath01110,Biosynthesis of secondary metabolites|ath01100,Metabolic pathways	http://www.uniprot.org/uniprot/P52901
240	PREDICTED: citrate synthase, mitochondrial isoform X4	gi|743916626	3.61±0.77	P20115	CSY4	GO:0009185,ribonucleoside diphosphate metabolic process|GO:0010035,response to inorganic substance|GO:0010038,response to metal ion|GO:0006732,coenzyme metabolic process|GO:0009141,nucleoside triphosphate metabolic process|GO:0009144,purine nucleoside triphosphate metabolic process|GO:0019752,carboxylic acid metabolic process|GO:0043436,oxoacid metabolic process|GO:0006099,tricarboxylic acid cycl…	GO:0031974,membrane-enclosed lumen|GO:0043229,intracellular organelle|GO:0071944,cell periphery|GO:0043227,membrane-bounded organelle|GO:0043226,organelle|GO:0005737,cytoplasm|GO:0009536,plastid|GO:0005618,cell wall|GO:0005739,mitochondrion|GO:0005759,mitochondrial matrix|GO:0005794,Golgi apparatus|GO:0030312,external encapsulating structure|GO:0012505,endomembrane system|GO:0009507,chloroplast|G…	GO:0035639,purine ribonucleoside triphosphate binding|GO:0036440,citrate synthase activity|GO:0008270,zinc ion binding|GO:0043167,ion binding|GO:1901363,heterocyclic compound binding|GO:1901265,nucleoside phosphate binding|GO:0001882,nucleoside binding|GO:0046912,transferase activity, transferring acyl groups, acyl groups converted into alkyl on transfer|GO:0043169,cation binding|GO:0046914,trans…	ath00630,Glyoxylate and dicarboxylate metabolism|ath00020,Citrate cycle (TCA cycle)|ath01210,2-Oxocarboxylic acid metabolism|ath01230,Biosynthesis of amino acids|ath01200,Carbon metabolism|ath01110,Biosynthesis of secondary metabolites|ath01100,Metabolic pathways	http://www.uniprot.org/uniprot/P20115
253	PREDICTED: cytochrome b6	gi|743810316	0.19±0.04	P56773	petB	GO:0044710,single-organism metabolic process|GO:0015980,energy derivation by oxidation of organic compounds|GO:0009987,cellular process|GO:0044237,cellular metabolic process|GO:0022900,electron transport chain|GO:0045333,cellular respiration|GO:0044699,single-organism process|GO:0008152,metabolic process|GO:0022904,respiratory electron transport chain|GO:0044763,single-organism cellular process|G…	GO:0055035,plastid thylakoid membrane|GO:0034357,photosynthetic membrane|GO:0031976,plastid thylakoid|GO:0043229,intracellular organelle|GO:0005622,intracellular|GO:0043227,membrane-bounded organelle|GO:0043226,organelle|GO:0031224,intrinsic component of membrane|GO:0009535,chloroplast thylakoid membrane|GO:0009534,chloroplast thylakoid|GO:0031984,organelle subcompartment|GO:0016021,integral comp…	GO:0043169,cation binding|GO:0046914,transition metal ion binding|GO:0020037,heme binding|GO:0046906,tetrapyrrole binding|GO:0097159,organic cyclic compound binding|GO:0043167,ion binding|GO:0003824,catalytic activity|GO:0005488,binding|GO:0009055,electron carrier activity|GO:0045158,electron transporter, transferring electrons within cytochrome b6/f complex of photosystem II activity|GO:0005506,…	ath00195,Photosynthesis|ath01100,Metabolic pathways	http://www.uniprot.org/uniprot/P56773
292	Superoxide dismutase family protein	gi|566168071	0.1±0.02	O78310	CSD2	GO:0019222,regulation of metabolic process|GO:0044712,single-organism catabolic process|GO:0044710,single-organism metabolic process|GO:0010605,negative regulation of macromolecule metabolic process|GO:0010608,posttranscriptional regulation of gene expression|GO:0040029,regulation of gene expression, epigenetic|GO:0009642,response to light intensity|GO:0016458,gene silencing|GO:0048519,negative r…	GO:0048046,apoplast|GO:0043229,intracellular organelle|GO:0043227,membrane-bounded organelle|GO:0043226,organelle|GO:0009579,thylakoid|GO:0044446,intracellular organelle part|GO:0009536,plastid|GO:0009532,plastid stroma|GO:0009570,chloroplast stroma|GO:0044435,plastid part|GO:0044434,chloroplast part|GO:0005737,cytoplasm|GO:0009507,chloroplast|GO:0043231,intracellular membrane-bounded organelle|G…	GO:0005488,binding|GO:0016721,oxidoreductase activity, acting on superoxide radicals as acceptor|GO:0046872,metal ion binding|GO:0046914,transition metal ion binding|GO:0043169,cation binding|GO:0016209,antioxidant activity|GO:0043167,ion binding|GO:0003824,catalytic activity|GO:0008270,zinc ion binding|GO:0004784,superoxide dismutase activity|GO:0005507,copper ion binding|GO:0016491,oxidoreducta…	ath04146,Peroxisome	http://www.uniprot.org/uniprot/O78310
297	PREDICTED: malate dehydrogenase, glyoxysomal	gi|743795553	0.2±0.05	O82399	At2g22780	GO:0034440,lipid oxidation|GO:0009894,regulation of catabolic process|GO:0044238,primary metabolic process|GO:0080090,regulation of primary metabolic process|GO:0031329,regulation of cellular catabolic process|GO:0031326,regulation of cellular biosyntheti_x0000__x0000__x0000__x0000__x0000__x0000__x0000__x0000__x0000__x0000__x0000__x0000__x0000__x0000__x0000__x0000__x0000__x0000__x0000__x0000__x00…	GO:0005737,cytoplasm|GO:0009536,plastid|GO:0043231,intracellular membrane-bounded organelle|GO:0044464,cell part|GO:0005777,peroxisome|GO:0044444,cytoplasmic part|GO:0005623,cell|GO:0005622,intracellular|GO:0042579,microbody|GO:0043229,intracellular organ_x0000__x0000__x0000__x0000__x0000__x0000__x0000__x0000__x0000__x0000__x0000__x0000__x0000__x0000__x0000__x0000__x0000__x0000__x0000__x0000__x00…	GO:0016614,oxidoreductase activity, acting on CH-OH group of donors|GO:0016615,malate dehydrogenase activity|GO:0016616,oxidoreductase activity, acting on the CH-OH group of donors, NAD or NADP as acceptor|GO:0003824,catalytic activity|GO:0030060,L-malate耀䐽_x0000_㾀￦⸒⸒⸒槡⸒槡_x0000__x0000__x0000__x0000__x0000__x0000__x0002__x0000__x0000__x0000__xFFFF__xFFFF__x0000__x0000__x0000__x0000__x0000__x000…	ath00630,Glyoxylate and dicarboxylate metabolism|ath00620,Pyruvate metabolism|ath00020,Citrate cycle (TCA cycle)|ath00270,Cysteine and methionine metabolism|ath00710,Carbon fixation in photosynthetic organisms|ath01200,Carbon metabolism|ath01110,Biosynthe耀䐽_x0000_㾀￦⸒⸒⸒槡⸒槡_x0000__x0000__x0000__x0000__x0000__x0000__x0002__x0000__x0000__x0000__xFFFF__xFFFF__x0000__x0000__x0000__x0000__x0000__x000…	http://www.uniprot.org/uniprot/O82399
310	PREDICTED: NADP-dependent malic enzyme	gi|743925951	2.58±0.5	Q9CA83	NADP-ME4	GO:0006633,fatty acid biosynthetic process|GO:0006631,fatty acid metabolic process|GO:0022607,cellular component assembly|GO:0051289,protein homotetramerization|GO:0043933,macromolecular complex subunit organization|GO:0046364,monosaccharide biosynthetic process|GO:0019752,carboxylic acid metabolic process|GO:0044248,cellular catabolic process|GO:0043436,oxoacid metabolic process|GO:0044281,small…	GO:0005737,cytoplasm|GO:0009536,plastid|GO:0043231,intracellular membrane-bounded organelle|GO:0044464,cell part|GO:0044444,cytoplasmic part|GO:0005623,cell|GO:0005622,intracellular|GO:0043229,intracellular organelle|GO:0044424,intracellular part|GO:0043227,membrane-bounded organelle|GO:0043226,organelle|GO:0009507,chloroplast	GO:0004470,malic enzyme activity|GO:0051287,NAD binding|GO:0008948,oxaloacetate decarboxylase activity|GO:0008270,zinc ion binding|GO:0043167,ion binding|GO:1901363,heterocyclic compound binding|GO:1901265,nucleoside phosphate binding|GO:0016491,oxidoreductase activity|GO:0043169,cation binding|GO:0046914,transition metal ion binding|GO:0016829,lyase activity|GO:0000166,nucleotide binding|GO:0046…	ath00620,Pyruvate metabolism|ath00710,Carbon fixation in photosynthetic organisms|ath01100,Metabolic pathways|ath01200,Carbon metabolism	http://www.uniprot.org/uniprot/Q9CA83
311	NADH-plastoquinone oxidoreductase subunit 7 (chloroplast)	gi|705245244	0.34±0.04	P56753	ndhH	GO:0044710,single-organism metabolic process|GO:0006810,transport|GO:0019684,photosynthesis, light reaction|GO:0009987,cellular process|GO:0044237,cellular metabolic process|GO:0051179,localization|GO:0055114,oxidation-reduction process|GO:0008152,metabolic process|GO:0006091,generation of precursor metabolites and energy|GO:0051234,establishment of localization|GO:0015979,photosynthesis|GO:00446…	GO:0055035,plastid thylakoid membrane|GO:0034357,photosynthetic membrane|GO:0031976,plastid thylakoid|GO:0043229,intracellular organelle|GO:0009579,thylakoid|GO:0043227,membrane-bounded organelle|GO:0043226,organelle|GO:0009535,chloroplast thylakoid membrane|GO:0009534,chloroplast thylakoid|GO:0031984,organelle subcompartment|GO:0016020,membrane|GO:0044436,thylakoid part|GO:0044435,plastid part|G…	GO:0005488,binding|GO:0050662,coenzyme binding|GO:0003824,catalytic activity|GO:0051287,NAD binding|GO:0000166,nucleotide binding|GO:0036094,small molecule binding|GO:0016655,oxidoreductase activity, acting on NAD(P)H, quinone or similar compound as acceptor|GO:0048037,cofactor binding|GO:0016651,oxidoreductase activity, acting on NAD(P)H|GO:0097159,organic cyclic compound binding|GO:0048038,quin…	ath00190,Oxidative phosphorylation|ath01100,Metabolic pathways	http://www.uniprot.org/uniprot/P56753
389	hypothetical protein POPTR_0010s15200g	gi|566190935	2.84±1.48	A8MS68	LPD1	GO:0006637,acyl-CoA metabolic process|GO:0006732,coenzyme metabolic process|GO:0019752,carboxylic acid metabolic process|GO:0042592,homeostatic process|GO:0044249,cellular biosynthetic process|GO:0042744,hydrogen peroxide catabolic process|GO:0009108,coenzyme biosynthetic process|GO:0044281,small molecule metabolic process|GO:0006090,pyruvate metabolic process|GO:0050789,regulation of biological …	GO:0031974,membrane-enclosed lumen|GO:0031975,envelope|GO:0043229,intracellular organelle|GO:0043228,non-membrane-bounded organelle|GO:0043227,membrane-bounded organelle|GO:0043226,organelle|GO:0005737,cytoplasm|GO:0009941,chloroplast envelope|GO:0009536,plastid|GO:0031981,nuclear lumen|GO:0005730,nucleolus|GO:0009570,chloroplast stroma|GO:0005634,nucleus|GO:0044435,plastid part|GO:0044434,chloro…	GO:0043168,anion binding|GO:0050662,coenzyme binding|GO:0050660,flavin adenine dinucleotide binding|GO:0005488,binding|GO:0097159,organic cyclic compound binding|GO:0000166,nucleotide binding|GO:0036094,small molecule binding|GO:0003824,catalytic activity|GO:0048037,cofactor binding|GO:0016651,oxidoreductase activity, acting on NAD(P)H|GO:0016667,oxidoreductase activity, acting on a sulfur group …	ath00630,Glyoxylate and dicarboxylate metabolism|ath00620,Pyruvate metabolism|ath00020,Citrate cycle (TCA cycle)|ath00260,Glycine, serine and threonine metabolism|ath00010,Glycolysis / Gluconeogenesis|ath00640,Propanoate metabolism|ath01200,Carbon metabolism|ath01110,Biosynthesis of secondary metabolites|ath01100,Metabolic pathways|ath00280,Valine, leucine and isoleucine degradation	http://www.uniprot.org/uniprot/A8MS68
401	PREDICTED: glutathione S-transferase DHAR3, chloroplastic	gi|743821311	0.09±0.03	Q8LE52	DHAR3	GO:0008152,metabolic process|GO:0044248,cellular catabolic process|GO:0061024,membrane organization|GO:0014070,response to organic cyclic compound|GO:0010027,thylakoid membrane organization|GO:0044699,single-organism process|GO:0009657,plastid organization|GO:0044712,single-organism catabolic process|GO:0044267,cellular protein metabolic process|GO:0044710,single-organism metabolic process|GO:004…	GO:0031975,envelope|GO:0043229,intracellular organelle|GO:0043227,membrane-bounded organelle|GO:0043226,organelle|GO:0005737,cytoplasm|GO:0009941,chloroplast envelope|GO:0009536,plastid|GO:0009532,plastid stroma|GO:0009570,chloroplast stroma|GO:0044435,plastid part|GO:0044434,chloroplast part|GO:0031967,organelle envelope|GO:0009507,chloroplast|GO:0009526,plastid envelope|GO:0043231,intracellular…	GO:0045174,glutathione dehydrogenase (ascorbate) activity|GO:0004364,glutathione transferase activity|GO:0016765,transferase activity, transferring alkyl or aryl (other than methyl) groups|GO:0016209,antioxidant activity|GO:0003824,catalytic activity|GO:0016672,oxidoreductase activity, acting on a sulfur group of donors, quinone or similar compound as acceptor|GO:0015038,glutathione disulfide oxi…		http://www.uniprot.org/uniprot/Q8LE52
402	PREDICTED: probable aldo-keto reductase 2	gi|743912326	2.11±0.71	Q93ZN2	At1g60710	GO:0080090,regulation of primary metabolic process|GO:0019222,regulation of metabolic process|GO:0009167,purine ribonucleoside monophosphate metabolic process|GO:0044281,small molecule metabolic process|GO:0009161,ribonucleoside monophosphate metabolic process|GO:0009698,phenylpropanoid metabolic process|GO:0009699,phenylpropanoid biosynthetic process|GO:1901360,organic cyclic compound metabolic …	GO:0005737,cytoplasm|GO:0005829,cytosol|GO:0044464,cell part|GO:0005623,cell|GO:0005622,intracellular|GO:0044444,cytoplasmic part|GO:0044424,intracellular part	GO:0003824,catalytic activity|GO:0016491,oxidoreductase activity		http://www.uniprot.org/uniprot/Q93ZN2
409	PREDICTED: ribulose bisphosphate carboxylase small chain, chloroplastic-like, partial	gi|743942424	0.29±0.06	P10795	RBCS-1A	GO:0070271,protein complex biogenesis|GO:0009314,response to radiation|GO:0044249,cellular biosynthetic process|GO:0015977,carbon fixation|GO:0009416,response to light stimulus|GO:0015979,photosynthesis|GO:0044699,single-organism process|GO:1901576,organic substance biosynthetic process|GO:0044710,single-organism metabolic process|GO:0044711,single-organism biosynthetic process|GO:0019685,photosy…	GO:0022626,cytosolic ribosome|GO:0055035,plastid thylakoid membrane|GO:0034357,photosynthetic membrane|GO:0031976,plastid thylakoid|GO:0031977,thylakoid lumen|GO:0031975,envelope|GO:0048046,apoplast|GO:0043229,intracellular organelle|GO:0043228,non-membrane-bounded organelle|GO:0042170,plastid membrane|GO:0005622,intracellular|GO:0043227,membrane-bounded organelle|GO:0043226,organelle|GO:0009535,…	GO:0043169,cation binding|GO:0004497,monooxygenase activity|GO:0046872,metal ion binding|GO:0046914,transition metal ion binding|GO:0016984,ribulose-bisphosphate carboxylase activity|GO:0016829,lyase activity|GO:0016830,carbon-carbon lyase activity|GO:0016831,carboxy-lyase activity|GO:0043167,ion binding|GO:0003824,catalytic activity|GO:0005488,binding|GO:0005507,copper ion binding|GO:0016491,oxi…	ath00630,Glyoxylate and dicarboxylate metabolism|ath00710,Carbon fixation in photosynthetic organisms|ath01100,Metabolic pathways|ath01200,Carbon metabolism	http://www.uniprot.org/uniprot/P10795
450	PREDICTED: peroxidase 12-like	gi|743899195	4.27±0.28	Q96520	PER12	GO:0048638,regulation of developmental growth|GO:0048466,androecium development|GO:0008152,metabolic process|GO:0048589,developmental growth|GO:0048443,stamen development|GO:0048569,post-embryonic organ development|GO:0009791,post-embryonic development|GO:0042744,hydrogen peroxide catabolic process|GO:0035266,meristem growth|GO:0050789,regulation of biological process|GO:0044699,single-organism p…	GO:0043229,intracellular organelle|GO:0071944,cell periphery|GO:0043227,membrane-bounded organelle|GO:0043226,organelle|GO:0030054,cell junction|GO:0005737,cytoplasm|GO:0005773,vacuole|GO:0016020,membrane|GO:0030312,external encapsulating structure|GO:0055044,symplast|GO:0005911,cell-cell junction|GO:0009505,plant-type cell wall|GO:0009506,plasmodesma|GO:0043231,intracellular membrane-bounded org…	GO:0043169,cation binding|GO:0046872,metal ion binding|GO:0020037,heme binding|GO:0046906,tetrapyrrole binding|GO:0097159,organic cyclic compound binding|GO:0016209,antioxidant activity|GO:0043167,ion binding|GO:1901363,heterocyclic compound binding|GO:0003824,catalytic activity|GO:0005488,binding|GO:0016684,oxidoreductase activity, acting on peroxide as acceptor|GO:0004601,peroxidase activity|GO…	ath00940,Phenylpropanoid biosynthesis|ath01100,Metabolic pathways|ath01110,Biosynthesis of secondary metabolites	http://www.uniprot.org/uniprot/Q96520
452	PREDICTED: isocitrate dehydrogenase NADP	gi|743907790	0.47±0.07	Q8LPJ5	At5g14590	GO:0019752,carboxylic acid metabolic process|GO:0006099,tricarboxylic acid cycle|GO:0009060,aerobic respiration|GO:0044281,small molecule metabolic process|GO:0006091,generation of precursor metabolites and energy|GO:0072350,tricarboxylic acid metabolic process|GO:0044699,single-organism process|GO:0044710,single-organism metabolic process|GO:0071704,organic substance metabolic process|GO:0045333…	GO:0031976,plastid thylakoid|GO:0043229,intracellular organelle|GO:0043227,membrane-bounded organelle|GO:0043226,organelle|GO:0009579,thylakoid|GO:0009534,chloroplast thylakoid|GO:0031984,organelle subcompartment|GO:0009532,plastid stroma|GO:0009570,chloroplast stroma|GO:0005739,mitochondrion|GO:0044435,plastid part|GO:0044434,chloroplast part|GO:0005737,cytoplasm|GO:0009536,plastid|GO:0009507,ch…	GO:0043169,cation binding|GO:0043167,ion binding|GO:0016614,oxidoreductase activity, acting on CH-OH group of donors|GO:0016616,oxidoreductase activity, acting on the CH-OH group of donors, NAD or NADP as acceptor|GO:0003824,catalytic activity|GO:0051287,NAD binding|GO:0000287,magnesium ion binding|GO:0036094,small molecule binding|GO:0000166,nucleotide binding|GO:0050662,coenzyme binding|GO:0004…	ath00020,Citrate cycle (TCA cycle)|ath01230,Biosynthesis of amino acids|ath04146,Peroxisome|ath01210,2-Oxocarboxylic acid metabolism|ath00480,Glutathione metabolism|ath01200,Carbon metabolism|ath01110,Biosynthesis of secondary metabolites|ath01100,Metabolic pathways	http://www.uniprot.org/uniprot/Q8LPJ5
455	PREDICTED: D-3-phosphoglycerate dehydrogenase 3, chloroplastic-like	gi|743803571	2.56±0.97	O49485	PGDH1	GO:0044707,single-multicellular organism process|GO:0061458,reproductive system development|GO:0019752,carboxylic acid metabolic process|GO:0009791,post-embryonic development|GO:0009790,embryo development|GO:0009793,embryo development ending in seed dormancy|GO:0006807,nitrogen compound metabolic process|GO:0044281,small molecule metabolic process|GO:0044283,small molecule biosynthetic process|GO…	GO:0043229,intracellular organelle|GO:0043227,membrane-bounded organelle|GO:0043226,organelle|GO:0005737,cytoplasm|GO:0044446,intracellular organelle part|GO:0009536,plastid|GO:0009532,plastid stroma|GO:0009570,chloroplast stroma|GO:0016020,membrane|GO:0005739,mitochondrion|GO:0044435,plastid part|GO:0044434,chloroplast part|GO:0009507,chloroplast|GO:0043231,intracellular membrane-bounded organel…	GO:0035639,purine ribonucleoside triphosphate binding|GO:0051287,NAD binding|GO:0005488,binding|GO:0043167,ion binding|GO:0016597,amino acid binding|GO:1901363,heterocyclic compound binding|GO:1901265,nucleoside phosphate binding|GO:0001882,nucleoside binding|GO:0043168,anion binding|GO:0050662,coenzyme binding|GO:0000166,nucleotide binding|GO:0004617,phosphoglycerate dehydrogenase activity|GO:00…	ath00260,Glycine, serine and threonine metabolism|ath01100,Metabolic pathways|ath01200,Carbon metabolism|ath01230,Biosynthesis of amino acids	http://www.uniprot.org/uniprot/O49485
493	PREDICTED: uncharacterized protein LOC105113849	gi|743928577	0.46±0.1	Q9FX85	PER10	GO:0044712,single-organism catabolic process|GO:0044710,single-organism metabolic process|GO:0044237,cellular metabolic process|GO:0050896,response to stimulus|GO:0009987,cellular process|GO:0072593,reactive oxygen species metabolic process|GO:0044248,cellular catabolic process|GO:0006950,response to stress|GO:0042744,hydrogen peroxide catabolic process|GO:0044763,single-organism cellular process…	GO:0005576,extracellular region	GO:0043169,cation binding|GO:0046872,metal ion binding|GO:0020037,heme binding|GO:0046906,tetrapyrrole binding|GO:0097159,organic cyclic compound binding|GO:0016209,antioxidant activity|GO:0043167,ion binding|GO:1901363,heterocyclic compound binding|GO:0003824,catalytic activity|GO:0005488,binding|GO:0016684,oxidoreductase activity, acting on peroxide as acceptor|GO:0004601,peroxidase activity|GO…	ath00940,Phenylpropanoid biosynthesis|ath01100,Metabolic pathways|ath01110,Biosynthesis of secondary metabolites	http://www.uniprot.org/uniprot/Q9FX85
506	PREDICTED: fructose-1,6-bisphosphatase, chloroplastic-like	gi|743937119	0.46±0.01	P25851	FBP	GO:0019220,regulation of phosphate metabolic process|GO:0080090,regulation of primary metabolic process|GO:0019222,regulation of metabolic process|GO:0006470,protein dephosphorylation|GO:0006778,porphyrin-containing compound metabolic process|GO:0006779,porphyrin-containing compound biosynthetic process|GO:0061024,membrane organization|GO:0015977,carbon fixation|GO:0044281,small molecule metaboli…	GO:0031975,envelope|GO:0048046,apoplast|GO:0043229,intracellular organelle|GO:0043227,membrane-bounded organelle|GO:0043226,organelle|GO:0005737,cytoplasm|GO:0009536,plastid|GO:0009532,plastid stroma|GO:0009570,chloroplast stroma|GO:0010319,stromule|GO:0044435,plastid part|GO:0044434,chloroplast part|GO:0031967,organelle envelope|GO:0009507,chloroplast|GO:0009526,plastid envelope|GO:0043231,intra…	GO:0050308,sugar-phosphatase activity|GO:0019203,carbohydrate phosphatase activity|GO:0042132,fructose 1,6-bisphosphate 1-phosphatase activity|GO:0016791,phosphatase activity|GO:0016787,hydrolase activity|GO:0043169,cation binding|GO:0016788,hydrolase activity, acting on ester bonds|GO:0043167,ion binding|GO:0042578,phosphoric ester hydrolase activity|GO:0003824,catalytic activity|GO:0005488,bind…	ath00030,Pentose phosphate pathway|ath00710,Carbon fixation in photosynthetic organisms|ath00010,Glycolysis / Gluconeogenesis|ath00051,Fructose and mannose metabolism|ath01200,Carbon metabolism|ath01110,Biosynthesis of secondary metabolites|ath01100,Metabolic pathways	http://www.uniprot.org/uniprot/P25851
515	PREDICTED: ferritin-3, chloroplastic-like	gi|743879261	4.83±0.7	Q9SRL5	FER2	GO:0008152,metabolic process|GO:0050801,ion homeostasis|GO:0010039,response to iron ion|GO:0000302,response to reactive oxygen species|GO:0042592,homeostatic process|GO:0055072,iron ion homeostasis|GO:0006826,iron ion transport|GO:0055076,transition metal ion homeostasis|GO:0098771,inorganic ion homeostasis|GO:0015979,photosynthesis|GO:0044699,single-organism process|GO:0009719,response to endoge…	GO:0005737,cytoplasm|GO:0009536,plastid|GO:0043231,intracellular membrane-bounded organelle|GO:0044464,cell part|GO:0044444,cytoplasmic part|GO:0005623,cell|GO:0005622,intracellular|GO:0043229,intracellular organelle|GO:0044424,intracellular part|GO:0043227,membrane-bounded organelle|GO:0043226,organelle|GO:0009507,chloroplast	GO:0043169,cation binding|GO:0016722,oxidoreductase activity, oxidizing metal ions|GO:0016724,oxidoreductase activity, oxidizing metal ions, oxygen as acceptor|GO:0046914,transition metal ion binding|GO:0003824,catalytic activity|GO:0004322,ferroxidase activity|GO:0043167,ion binding|GO:0008199,ferric iron binding|GO:0005488,binding|GO:0005506,iron ion binding|GO:0046872,metal ion binding|GO:0016…		http://www.uniprot.org/uniprot/Q9SRL5
562	PREDICTED: photosystem I reaction center subunit VI, chloroplastic-like	gi|743932458	0.14±0.02	Q9SUI6	PSAH2	GO:0019220,regulation of phosphate metabolic process|GO:0080090,regulation of primary metabolic process|GO:0019222,regulation of metabolic process|GO:0006470,protein dephosphorylation|GO:0044281,small molecule metabolic process|GO:0044283,small molecule biosynthetic process|GO:0015979,photosynthesis|GO:1901360,organic cyclic compound metabolic process|GO:0044710,single-organism metabolic process|…	GO:0055035,plastid thylakoid membrane|GO:0034357,photosynthetic membrane|GO:0031976,plastid thylakoid|GO:0043229,intracellular organelle|GO:0005622,intracellular|GO:0043227,membrane-bounded organelle|GO:0043226,organelle|GO:0031224,intrinsic component of membrane|GO:0009535,chloroplast thylakoid membrane|GO:0009534,chloroplast thylakoid|GO:0031984,organelle subcompartment|GO:0009532,plastid strom…		ath00195,Photosynthesis|ath01100,Metabolic pathways	http://www.uniprot.org/uniprot/Q9SUI6
579	O2 evolving complex 33kD family protein	gi|224094610	0.23±0.17	Q9S841	PSBO2	GO:0008104,protein localization|GO:0019220,regulation of phosphate metabolic process|GO:0080090,regulation of primary metabolic process|GO:0019222,regulation of metabolic process|GO:0019682,glyceraldehyde-3-phosphate metabolic process|GO:0048585,negative regulation of response to stimulus|GO:0051667,establishment of plastid localization|GO:0048583,regulation of response to stimulus|GO:0031348,neg…	GO:0055035,plastid thylakoid membrane|GO:0034357,photosynthetic membrane|GO:0031976,plastid thylakoid|GO:0031977,thylakoid lumen|GO:0019898,extrinsic component of membrane|GO:0043229,intracellular organelle|GO:0005622,intracellular|GO:0009654,photosystem II oxygen evolving complex|GO:0043226,organelle|GO:0031224,intrinsic component of membrane|GO:0009535,chloroplast thylakoid membrane|GO:0009534,…	GO:0005488,binding|GO:0043169,cation binding|GO:0005515,protein binding|GO:0097159,organic cyclic compound binding|GO:0043167,ion binding|GO:0008266,poly(U) RNA binding|GO:0003727,single-stranded RNA binding|GO:0003723,RNA binding|GO:0003676,nucleic acid binding|GO:0008187,poly-pyrimidine tract binding|GO:0046872,metal ion binding|GO:1901363,heterocyclic compound binding|GO:0005509,calcium ion bi…	ath00195,Photosynthesis|ath01100,Metabolic pathways	http://www.uniprot.org/uniprot/Q9S841
594	PREDICTED: non-functional NADPH-dependent codeinone reductase 2-like	gi|743872620	3.9±0.99	Q9SXC0	F23H11.27	GO:0009628,response to abiotic stimulus|GO:0044710,single-organism metabolic process|GO:0050896,response to stimulus|GO:0006950,response to stress|GO:0006970,response to osmotic stress|GO:0055114,oxidation-reduction process|GO:0008152,metabolic process|GO:0009651,response to salt stress|GO:0044699,single-organism process	GO:0005737,cytoplasm|GO:0005829,cytosol|GO:0044464,cell part|GO:0005623,cell|GO:0005622,intracellular|GO:0044444,cytoplasmic part|GO:0044424,intracellular part	GO:0003824,catalytic activity|GO:0016491,oxidoreductase activity		http://www.uniprot.org/uniprot/Q9SXC0
596	PREDICTED: aspartate aminotransferase, cytoplasmic	gi|743814108	3.17±1.13	P46644	ASP3	GO:0022622,root system development|GO:0034440,lipid oxidation|GO:0048589,developmental growth|GO:0048588,developmental cell growth|GO:0048468,cell development|GO:0048469,cell maturation|GO:0043449,cellular alkene metabolic process|GO:0044281,small molecule metabolic process|GO:0044282,small molecule catabolic process|GO:0009693,ethylene biosynthetic process|GO:0071840,cellular component organizat…	GO:0005737,cytoplasm|GO:0009536,plastid|GO:0043231,intracellular membrane-bounded organelle|GO:0044464,cell part|GO:0005829,cytosol|GO:0016020,membrane|GO:0005777,peroxisome|GO:0044444,cytoplasmic part|GO:0005623,cell|GO:0005622,intracellular|GO:0042579,microbody|GO:0043229,intracellular organelle|GO:0044424,intracellular part|GO:0043227,membrane-bounded organelle|GO:0043226,organelle|GO:0009507,…	GO:0043168,anion binding|GO:0008483,transaminase activity|GO:0097159,organic cyclic compound binding|GO:0003824,catalytic activity|GO:0070546,L-phenylalanine aminotransferase activity|GO:1901363,heterocyclic compound binding|GO:0004069,L-aspartate:2-oxoglutarate aminotransferase activity|GO:0016740,transferase activity|GO:0048037,cofactor binding|GO:0080130,L-phenylalanine:2-oxoglutarate aminotra…	ath01230,Biosynthesis of amino acids|ath00400,Phenylalanine, tyrosine and tryptophan biosynthesis|ath00220,Arginine biosynthesis|ath00270,Cysteine and methionine metabolism|ath01210,2-Oxocarboxylic acid metabolism|ath00350,Tyrosine metabolism|ath00950,Isoquinoline alkaloid biosynthesis|ath00360,Phenylalanine metabolism|ath01100,Metabolic pathways|ath00710,Carbon fixation in photosynthetic organis…	http://www.uniprot.org/uniprot/P46644
620	hypothetical protein POPTR_0004s05340g	gi|566165056	0.28±0.05	Q9ZP06	At1g53240	GO:0009167,purine ribonucleoside monophosphate metabolic process|GO:0044281,small molecule metabolic process|GO:0009161,ribonucleoside monophosphate metabolic process|GO:0072350,tricarboxylic acid metabolic process|GO:0071840,cellular component organization or biogenesis|GO:0044712,single-organism catabolic process|GO:0044710,single-organism metabolic process|GO:0044711,single-organism biosynthet…	GO:0031974,membrane-enclosed lumen|GO:0048046,apoplast|GO:0043229,intracellular organelle|GO:0071944,cell periphery|GO:0043227,membrane-bounded organelle|GO:0043226,organelle|GO:0005737,cytoplasm|GO:0009536,plastid|GO:0005618,cell wall|GO:0005739,mitochondrion|GO:0005759,mitochondrial matrix|GO:0005794,Golgi apparatus|GO:0030312,external encapsulating structure|GO:0012505,endomembrane system|GO:0…	GO:0043169,cation binding|GO:0046872,metal ion binding|GO:0016614,oxidoreductase activity, acting on CH-OH group of donors|GO:0016615,malate dehydrogenase activity|GO:0016616,oxidoreductase activity, acting on the CH-OH group of donors, NAD or NADP as acceptor|GO:0043167,ion binding|GO:0046914,transition metal ion binding|GO:0003824,catalytic activity|GO:0030060,L-malate dehydrogenase activity|GO…	ath00630,Glyoxylate and dicarboxylate metabolism|ath00620,Pyruvate metabolism|ath00020,Citrate cycle (TCA cycle)|ath00270,Cysteine and methionine metabolism|ath00710,Carbon fixation in photosynthetic organisms|ath01200,Carbon metabolism|ath01110,Biosynthesis of secondary metabolites|ath01100,Metabolic pathways	http://www.uniprot.org/uniprot/Q9ZP06
703	PREDICTED: vacuolar protein sorting-associated protein 4B-like	gi|743832246	0.31±0.11	Q9ZNT0	SKD1	GO:0034440,lipid oxidation|GO:0008104,protein localization|GO:0048468,cell development|GO:0061025,membrane fusion|GO:0061024,membrane organization|GO:0055075,potassium ion homeostasis|GO:0044281,small molecule metabolic process|GO:0044282,small molecule catabolic process|GO:0098771,inorganic ion homeostasis|GO:0055078,sodium ion homeostasis|GO:0071840,cellular component organization or biogenesis…	GO:0005770,late endosome|GO:0043229,intracellular organelle|GO:0043227,membrane-bounded organelle|GO:0043226,organelle|GO:0030054,cell junction|GO:0010008,endosome membrane|GO:0005737,cytoplasm|GO:0031090,organelle membrane|GO:0005634,nucleus|GO:0016020,membrane|GO:0098805,whole membrane|GO:0031902,late endosome membrane|GO:0098588,bounding membrane of organelle|GO:0055044,symplast|GO:0012505,end…	GO:0035639,purine ribonucleoside triphosphate binding|GO:0005488,binding|GO:0016887,ATPase activity|GO:0043167,ion binding|GO:1901363,heterocyclic compound binding|GO:1901265,nucleoside phosphate binding|GO:0001882,nucleoside binding|GO:0043168,anion binding|GO:0042623,ATPase activity, coupled|GO:0008568,microtubule-severing ATPase activity|GO:0000166,nucleotide binding|GO:0001883,purine nucleosi…	ath04144,Endocytosis	http://www.uniprot.org/uniprot/Q9ZNT0
726	photosystem II cytochrome b559 alpha subunit (chloroplast)	gi|705245218	0.34±0.04	P56779	psbE	GO:0044710,single-organism metabolic process|GO:0019684,photosynthesis, light reaction|GO:0009987,cellular process|GO:0044237,cellular metabolic process|GO:0022900,electron transport chain|GO:0044763,single-organism cellular process|GO:0055114,oxidation-reduction process|GO:0008152,metabolic process|GO:0006091,generation of precursor metabolites and energy|GO:0015979,photosynthesis|GO:0044699,sin…	GO:0055035,plastid thylakoid membrane|GO:0034357,photosynthetic membrane|GO:0031976,plastid thylakoid|GO:0043229,intracellular organelle|GO:0005622,intracellular|GO:0043227,membrane-bounded organelle|GO:0043226,organelle|GO:0031224,intrinsic component of membrane|GO:0009535,chloroplast thylakoid membrane|GO:0009534,chloroplast thylakoid|GO:0031984,organelle subcompartment|GO:0016021,integral comp…	GO:0043169,cation binding|GO:0020037,heme binding|GO:0046914,transition metal ion binding|GO:0046906,tetrapyrrole binding|GO:0097159,organic cyclic compound binding|GO:0043167,ion binding|GO:0005488,binding|GO:0005506,iron ion binding|GO:0046872,metal ion binding|GO:1901363,heterocyclic compound binding|GO:0009055,electron carrier activity	ath00195,Photosynthesis|ath01100,Metabolic pathways	http://www.uniprot.org/uniprot/P56779
806	hypothetical protein POPTR_0016s10390g	gi|566209593	17.62±3.84	Q0PGJ6	AKR4C9	GO:1901700,response to oxygen-containing compound|GO:0009628,response to abiotic stimulus|GO:0044710,single-organism metabolic process|GO:0042221,response to chemical|GO:0009414,response to water deprivation|GO:0050896,response to stimulus|GO:0009415,response to water|GO:0009636,response to toxic substance|GO:0006950,response to stress|GO:0006970,response to osmotic stress|GO:0055114,oxidation-re…	GO:0005737,cytoplasm|GO:0009536,plastid|GO:0043231,intracellular membrane-bounded organelle|GO:0044464,cell part|GO:0044444,cytoplasmic part|GO:0005623,cell|GO:0005622,intracellular|GO:0043229,intracellular organelle|GO:0044424,intracellular part|GO:0043227,membrane-bounded organelle|GO:0043226,organelle|GO:0009507,chloroplast	GO:0004033,aldo-keto reductase (NADP) activity|GO:0008106,alcohol dehydrogenase (NADP+) activity|GO:0050661,NADP binding|GO:0016614,oxidoreductase activity, acting on CH-OH group of donors|GO:0016616,oxidoreductase activity, acting on the CH-OH group of donors, NAD or NADP as acceptor|GO:0050662,coenzyme binding|GO:0048037,cofactor binding|GO:0097159,organic cyclic compound binding|GO:0000166,nuc…		http://www.uniprot.org/uniprot/Q0PGJ6
922	NADH-plastoquinone oxidoreductase subunit I (chloroplast)	gi|675155288	0.47±0.17	P56755	ndhI	GO:0044710,single-organism metabolic process|GO:0019684,photosynthesis, light reaction|GO:0009987,cellular process|GO:0044237,cellular metabolic process|GO:0055114,oxidation-reduction process|GO:0008152,metabolic process|GO:0006091,generation of precursor metabolites and energy|GO:0015979,photosynthesis|GO:0044699,single-organism process	GO:0055035,plastid thylakoid membrane|GO:0034357,photosynthetic membrane|GO:0031976,plastid thylakoid|GO:0043229,intracellular organelle|GO:0009579,thylakoid|GO:0043227,membrane-bounded organelle|GO:0043226,organelle|GO:0009535,chloroplast thylakoid membrane|GO:0009534,chloroplast thylakoid|GO:0031984,organelle subcompartment|GO:0016020,membrane|GO:0044436,thylakoid part|GO:0044435,plastid part|G…	GO:0005488,binding|GO:0043169,cation binding|GO:0048038,quinone binding|GO:0051539,4 iron, 4 sulfur cluster binding|GO:0046914,transition metal ion binding|GO:0003824,catalytic activity|GO:0048037,cofactor binding|GO:0008137,NADH dehydrogenase (ubiquinone) activity|GO:0051536,iron-sulfur cluster binding|GO:0043167,ion binding|GO:0016655,oxidoreductase activity, acting on NAD(P)H, quinone or simil…	ath00190,Oxidative phosphorylation|ath01100,Metabolic pathways	http://www.uniprot.org/uniprot/P56755
932	NADPH-protochlorophyllide oxidoreductase family protein	gi|224117218	0.43±0.07	Q42536	PORA	GO:0006778,porphyrin-containing compound metabolic process|GO:0006779,porphyrin-containing compound biosynthetic process|GO:0044249,cellular biosynthetic process|GO:0034641,cellular nitrogen compound metabolic process|GO:0006807,nitrogen compound metabolic process|GO:0042221,response to chemical|GO:1901362,organic cyclic compound biosynthetic process|GO:0015979,photosynthesis|GO:0044699,single-or…	GO:0031976,plastid thylakoid|GO:0031975,envelope|GO:0043229,intracellular organelle|GO:0043227,membrane-bounded organelle|GO:0043226,organelle|GO:0005737,cytoplasm|GO:0009534,chloroplast thylakoid|GO:0031984,organelle subcompartment|GO:0044435,plastid part|GO:0044434,chloroplast part|GO:0009579,thylakoid|GO:0009941,chloroplast envelope|GO:0031967,organelle envelope|GO:0009536,plastid|GO:0009507,c…	GO:0016628,oxidoreductase activity, acting on the CH-CH group of donors, NAD or NADP as acceptor|GO:0016627,oxidoreductase activity, acting on the CH-CH group of donors|GO:0016630,protochlorophyllide reductase activity|GO:0003824,catalytic activity|GO:0016491,oxidoreductase activity	ath00860,Porphyrin and chlorophyll metabolism|ath01110,Biosynthesis of secondary metabolites|ath01100,Metabolic pathways	http://www.uniprot.org/uniprot/Q42536
934	NADH-plastoquinone oxidoreductase subunit K (chloroplast)	gi|675155239	0.27±0.03	P56756	ndhK	GO:0044710,single-organism metabolic process|GO:0006810,transport|GO:0019684,photosynthesis, light reaction|GO:0009987,cellular process|GO:0044237,cellular metabolic process|GO:0051179,localization|GO:0055114,oxidation-reduction process|GO:0008152,metabolic process|GO:0006091,generation of precursor metabolites and energy|GO:0051234,establishment of localization|GO:0015979,photosynthesis|GO:00446…	GO:0055035,plastid thylakoid membrane|GO:0034357,photosynthetic membrane|GO:0031976,plastid thylakoid|GO:0043229,intracellular organelle|GO:0009579,thylakoid|GO:0043227,membrane-bounded organelle|GO:0043226,organelle|GO:0009535,chloroplast thylakoid membrane|GO:0009534,chloroplast thylakoid|GO:0031984,organelle subcompartment|GO:0016020,membrane|GO:0044436,thylakoid part|GO:0044435,plastid part|G…	GO:0005488,binding|GO:0043169,cation binding|GO:0048038,quinone binding|GO:0051539,4 iron, 4 sulfur cluster binding|GO:0046914,transition metal ion binding|GO:0003824,catalytic activity|GO:0048037,cofactor binding|GO:0008137,NADH dehydrogenase (ubiquinone) activity|GO:0051536,iron-sulfur cluster binding|GO:0043167,ion binding|GO:0016655,oxidoreductase activity, acting on NAD(P)H, quinone or simil…	ath00190,Oxidative phosphorylation|ath01100,Metabolic pathways	http://www.uniprot.org/uniprot/P56756
962	PREDICTED: monodehydroascorbate reductase, chloroplastic	gi|743852770	2±0.1	P92947	At1g63940	GO:0008152,metabolic process|GO:0044248,cellular catabolic process|GO:0042744,hydrogen peroxide catabolic process|GO:0042743,hydrogen peroxide metabolic process|GO:0044699,single-organism process|GO:0044712,single-organism catabolic process|GO:0044710,single-organism metabolic process|GO:0046686,response to cadmium ion|GO:0009987,cellular process|GO:0072593,reactive oxygen species metabolic proce…	GO:0031975,envelope|GO:0043229,intracellular organelle|GO:0043227,membrane-bounded organelle|GO:0043226,organelle|GO:0005737,cytoplasm|GO:0009536,plastid|GO:0009532,plastid stroma|GO:0009570,chloroplast stroma|GO:0010319,stromule|GO:0005739,mitochondrion|GO:0044435,plastid part|GO:0044434,chloroplast part|GO:0031967,organelle envelope|GO:0009507,chloroplast|GO:0009526,plastid envelope|GO:0043231,…	GO:0035639,purine ribonucleoside triphosphate binding|GO:0005488,binding|GO:0000166,nucleotide binding|GO:1901363,heterocyclic compound binding|GO:1901265,nucleoside phosphate binding|GO:0001882,nucleoside binding|GO:0043168,anion binding|GO:0050662,coenzyme binding|GO:0050660,flavin adenine dinucleotide binding|GO:0043167,ion binding|GO:0001883,purine nucleoside binding|GO:0032549,ribonucleoside…	ath00053,Ascorbate and aldarate metabolism|ath01100,Metabolic pathways	http://www.uniprot.org/uniprot/P92947
1028	malate dehydrogenase family protein	gi|224056321	0.5±0.04	O82399	At2g22780	GO:0034440,lipid oxidation|GO:0009894,regulation of catabolic process|GO:0044238,primary metabolic process|GO:0080090,regulation of primary metabolic process|GO:0031329,regulation of cellular catabolic process|GO:0031326,regulation of cellular biosynthetic process|GO:0031323,regulation of cellular metabolic process|GO:0006631,fatty acid metabolic process|GO:0019752,carboxylic acid metabolic proce…	GO:0005737,cytoplasm|GO:0009536,plastid|GO:0043231,intracellular membrane-bounded organelle|GO:0044464,cell part|GO:0005777,peroxisome|GO:0044444,cytoplasmic part|GO:0005623,cell|GO:0005622,intracellular|GO:0042579,microbody|GO:0043229,intracellular organelle|GO:0044424,intracellular part|GO:0009514,glyoxysome|GO:0043227,membrane-bounded organelle|GO:0043226,organelle|GO:0009507,chloroplast	GO:0016614,oxidoreductase activity, acting on CH-OH group of donors|GO:0016615,malate dehydrogenase activity|GO:0016616,oxidoreductase activity, acting on the CH-OH group of donors, NAD or NADP as acceptor|GO:0003824,catalytic activity|GO:0030060,L-malate dehydrogenase activity|GO:0016491,oxidoreductase activity	ath00630,Glyoxylate and dicarboxylate metabolism|ath00620,Pyruvate metabolism|ath00020,Citrate cycle (TCA cycle)|ath00270,Cysteine and methionine metabolism|ath00710,Carbon fixation in photosynthetic organisms|ath01200,Carbon metabolism|ath01110,Biosynthesis of secondary metabolites|ath01100,Metabolic pathways	http://www.uniprot.org/uniprot/O82399
1055	hypothetical protein POPTR_0006s14520g	gi|566176419	3.06±0.49	Q9FUP0	OPR3	GO:0009738,abscisic acid-activated signaling pathway|GO:0050794,regulation of cellular process|GO:0009694,jasmonic acid metabolic process|GO:0009695,jasmonic acid biosynthetic process|GO:0007165,signal transduction|GO:0044282,small molecule catabolic process|GO:0044283,small molecule biosynthetic process|GO:1901362,organic cyclic compound biosynthetic process|GO:1901360,organic cyclic compound me…	GO:0005737,cytoplasm|GO:0043231,intracellular membrane-bounded organelle|GO:0044464,cell part|GO:0005777,peroxisome|GO:0044444,cytoplasmic part|GO:0005623,cell|GO:0005622,intracellular|GO:0042579,microbody|GO:0043229,intracellular organelle|GO:0044424,intracellular part|GO:0043227,membrane-bounded organelle|GO:0043226,organelle	GO:0043168,anion binding|GO:0050662,coenzyme binding|GO:0016629,12-oxophytodienoate reductase activity|GO:0016628,oxidoreductase activity, acting on the CH-CH group of donors, NAD or NADP as acceptor|GO:0097367,carbohydrate derivative binding|GO:0097159,organic cyclic compound binding|GO:0016627,oxidoreductase activity, acting on the CH-CH group of donors|GO:0000166,nucleotide binding|GO:0036094,…	ath01110,Biosynthesis of secondary metabolites|ath01100,Metabolic pathways|ath00592,alpha-Linolenic acid metabolism	http://www.uniprot.org/uniprot/Q9FUP0
1093	cytochrome b6/f complex subunit IV (chloroplast)	gi|705245229	0.37±0.07	P56774	petD	GO:0044710,single-organism metabolic process|GO:0019684,photosynthesis, light reaction|GO:0009987,cellular process|GO:0044237,cellular metabolic process|GO:0022900,electron transport chain|GO:0044763,single-organism cellular process|GO:0055114,oxidation-reduction process|GO:0008152,metabolic process|GO:0006091,generation of precursor metabolites and energy|GO:0015979,photosynthesis|GO:0044699,sin…	GO:0055035,plastid thylakoid membrane|GO:0034357,photosynthetic membrane|GO:0031976,plastid thylakoid|GO:0043229,intracellular organelle|GO:0005622,intracellular|GO:0043227,membrane-bounded organelle|GO:0043226,organelle|GO:0031224,intrinsic component of membrane|GO:0009535,chloroplast thylakoid membrane|GO:0009534,chloroplast thylakoid|GO:0031984,organelle subcompartment|GO:0016021,integral comp…	GO:0003824,catalytic activity|GO:0045158,electron transporter, transferring electrons within cytochrome b6/f complex of photosystem II activity|GO:0045156,electron transporter, transferring electrons within the cyclic electron transport pathway of photosynthesis activity|GO:0016491,oxidoreductase activity|GO:0009055,electron carrier activity	ath00195,Photosynthesis|ath01100,Metabolic pathways	http://www.uniprot.org/uniprot/P56774
1098	hypothetical protein POPTR_0016s11621g	gi|566209778	0.39±0.1	P25851	FBP	GO:0019220,regulation of phosphate metabolic process|GO:0080090,regulation of primary metabolic process|GO:0019222,regulation of metabolic process|GO:0006470,protein dephosphorylation|GO:0006778,porphyrin-containing compound metabolic process|GO:0006779,porphyrin-containing compound biosynthetic process|GO:0061024,membrane organization|GO:0015977,carbon fixation|GO:0044281,small molecule metaboli…	GO:0031975,envelope|GO:0048046,apoplast|GO:0043229,intracellular organelle|GO:0043227,membrane-bounded organelle|GO:0043226,organelle|GO:0005737,cytoplasm|GO:0009536,plastid|GO:0009532,plastid stroma|GO:0009570,chloroplast stroma|GO:0010319,stromule|GO:0044435,plastid part|GO:0044434,chloroplast part|GO:0031967,organelle envelope|GO:0009507,chloroplast|GO:0009526,plastid envelope|GO:0043231,intra…	GO:0050308,sugar-phosphatase activity|GO:0019203,carbohydrate phosphatase activity|GO:0042132,fructose 1,6-bisphosphate 1-phosphatase activity|GO:0016791,phosphatase activity|GO:0016787,hydrolase activity|GO:0043169,cation binding|GO:0016788,hydrolase activity, acting on ester bonds|GO:0043167,ion binding|GO:0042578,phosphoric ester hydrolase activity|GO:0003824,catalytic activity|GO:0005488,bind…	ath00030,Pentose phosphate pathway|ath00710,Carbon fixation in photosynthetic organisms|ath00010,Glycolysis / Gluconeogenesis|ath00051,Fructose and mannose metabolism|ath01200,Carbon metabolism|ath01110,Biosynthesis of secondary metabolites|ath01100,Metabolic pathways	http://www.uniprot.org/uniprot/P25851
1128	PREDICTED: monothiol glutaredoxin-S16, chloroplastic	gi|743921364	0.43±0.12	Q8H7F6	GRXS16	GO:0048443,stamen development|GO:0048466,androecium development|GO:0048569,post-embryonic organ development|GO:0009791,post-embryonic development|GO:0032502,developmental process|GO:0007275,multicellular organismal development|GO:0044699,single-organism process|GO:0044710,single-organism metabolic process|GO:0050789,regulation of biological process|GO:0048437,floral organ development|GO:0061458,r…	GO:0005737,cytoplasm|GO:0009536,plastid|GO:0043231,intracellular membrane-bounded organelle|GO:0009532,plastid stroma|GO:0009570,chloroplast stroma|GO:0044464,cell part|GO:0044444,cytoplasmic part|GO:0005623,cell|GO:0005622,intracellular|GO:0044446,intracellular organelle part|GO:0043229,intracellular organelle|GO:0044435,plastid part|GO:0044434,chloroplast part|GO:0044424,intracellular part|GO:0…	GO:0016787,hydrolase activity|GO:0046872,metal ion binding|GO:0009055,electron carrier activity|GO:0051540,metal cluster binding|GO:0043169,cation binding|GO:0051536,iron-sulfur cluster binding|GO:0051537,2 iron, 2 sulfur cluster binding|GO:0043167,ion binding|GO:0003824,catalytic activity|GO:0005488,binding|GO:0016667,oxidoreductase activity, acting on a sulfur group of donors|GO:0015036,disulfi…		http://www.uniprot.org/uniprot/Q8H7F6
1189	PREDICTED: D-3-phosphoglycerate dehydrogenase 2, chloroplastic-like	gi|743906187	2.66±0.47	O04130	PGDH2	GO:0019752,carboxylic acid metabolic process|GO:0044249,cellular biosynthetic process|GO:0006807,nitrogen compound metabolic process|GO:0044281,small molecule metabolic process|GO:0044283,small molecule biosynthetic process|GO:0009069,serine family amino acid metabolic process|GO:0044699,single-organism process|GO:1901576,organic substance biosynthetic process|GO:0044710,single-organism metabolic…	GO:0005737,cytoplasm|GO:0009536,plastid|GO:0043231,intracellular membrane-bounded organelle|GO:0044464,cell part|GO:0044444,cytoplasmic part|GO:0005623,cell|GO:0005622,intracellular|GO:0043229,intracellular organelle|GO:0044424,intracellular part|GO:0043227,membrane-bounded organelle|GO:0043226,organelle|GO:0009507,chloroplast	GO:0043168,anion binding|GO:0050662,coenzyme binding|GO:0016614,oxidoreductase activity, acting on CH-OH group of donors|GO:0016616,oxidoreductase activity, acting on the CH-OH group of donors, NAD or NADP as acceptor|GO:0043177,organic acid binding|GO:0051287,NAD binding|GO:0031406,carboxylic acid binding|GO:0000166,nucleotide binding|GO:0036094,small molecule binding|GO:0003824,catalytic activi…	ath00260,Glycine, serine and threonine metabolism|ath01100,Metabolic pathways|ath01200,Carbon metabolism|ath01230,Biosynthesis of amino acids	http://www.uniprot.org/uniprot/O04130
1270	PREDICTED: thioredoxin-like 4, chloroplastic isoform X2	gi|743787097	2.42±1.99	Q9C5C5	At1g07700	GO:0044237,cellular metabolic process|GO:0018904,ether metabolic process|GO:0046173,polyol biosynthetic process|GO:0019751,polyol metabolic process|GO:0042592,homeostatic process|GO:0044281,small molecule metabolic process|GO:0044283,small molecule biosynthetic process|GO:0050789,regulation of biological process|GO:0044699,single-organism process|GO:1901576,organic substance biosynthetic process|…	GO:0005737,cytoplasm|GO:0009536,plastid|GO:0043231,intracellular membrane-bounded organelle|GO:0009532,plastid stroma|GO:0009570,chloroplast stroma|GO:0044464,cell part|GO:0044444,cytoplasmic part|GO:0005623,cell|GO:0005622,intracellular|GO:0044446,intracellular organelle part|GO:0043229,intracellular organelle|GO:0044435,plastid part|GO:0044434,chloroplast part|GO:0044424,intracellular part|GO:0…	GO:0003824,catalytic activity|GO:0016667,oxidoreductase activity, acting on a sulfur group of donors|GO:0015036,disulfide oxidoreductase activity|GO:0015035,protein disulfide oxidoreductase activity|GO:0016491,oxidoreductase activity		http://www.uniprot.org/uniprot/Q9C5C5
1294	PREDICTED: aspartate-semialdehyde dehydrogenase-like	gi|743785114	0.36±0.1	Q8VYI4	At1g14810	GO:0044238,primary metabolic process|GO:0006139,nucleobase-containing compound metabolic process|GO:0019752,carboxylic acid metabolic process|GO:0016053,organic acid biosynthetic process|GO:0034654,nucleobase-containing compound biosynthetic process|GO:0034641,cellular nitrogen compound metabolic process|GO:0009165,nucleotide biosynthetic process|GO:0009067,aspartate family amino acid biosyntheti…	GO:0005737,cytoplasm|GO:0009536,plastid|GO:0043231,intracellular membrane-bounded organelle|GO:0009532,plastid stroma|GO:0009570,chloroplast stroma|GO:0044464,cell part|GO:0044444,cytoplasmic part|GO:0005739,mitochondrion|GO:0005622,intracellular|GO:0044446,intracellular organelle part|GO:0043229,intracellular organelle|GO:0005623,cell|GO:0044435,plastid part|GO:0044434,chloroplast part|GO:004442…	GO:0050662,coenzyme binding|GO:0050661,NADP binding|GO:0051287,NAD binding|GO:0016620,oxidoreductase activity, acting on the aldehyde or oxo group of donors, NAD or NADP as acceptor|GO:0000166,nucleotide binding|GO:0036094,small molecule binding|GO:0003824,catalytic activity|GO:0016903,oxidoreductase activity, acting on the aldehyde or oxo group of donors|GO:0048037,cofactor binding|GO:0005488,bi…	ath00300,Lysine biosynthesis|ath00270,Cysteine and methionine metabolism|ath01210,2-Oxocarboxylic acid metabolism|ath00261,Monobactam biosynthesis|ath00260,Glycine, serine and threonine metabolism|ath01230,Biosynthesis of amino acids|ath01110,Biosynthesis of secondary metabolites|ath01100,Metabolic pathways	http://www.uniprot.org/uniprot/Q8VYI4
1340	cinnamyl alcohol dehydrogenase	gi|9998899	3.34±0.62	P48523	CAD4	GO:0044249,cellular biosynthetic process|GO:1901362,organic cyclic compound biosynthetic process|GO:0009699,phenylpropanoid biosynthetic process|GO:1901360,organic cyclic compound metabolic process|GO:1901576,organic substance biosynthetic process|GO:0044710,single-organism metabolic process|GO:0044711,single-organism biosynthetic process|GO:0009809,lignin biosynthetic process|GO:0009808,lignin m…		GO:0005488,binding|GO:0043169,cation binding|GO:0016614,oxidoreductase activity, acting on CH-OH group of donors|GO:0046914,transition metal ion binding|GO:0016616,oxidoreductase activity, acting on the CH-OH group of donors, NAD or NADP as acceptor|GO:0052747,sinapyl alcohol dehydrogenase activity|GO:0043167,ion binding|GO:0003824,catalytic activity|GO:0045551,cinnamyl-alcohol dehydrogenase acti…	ath00940,Phenylpropanoid biosynthesis|ath01100,Metabolic pathways|ath01110,Biosynthesis of secondary metabolites	http://www.uniprot.org/uniprot/P48523
1401	PREDICTED: uncharacterized protein LOC105117914	gi|743939144	0.36±0.01	Q8RXS1	PNSB4	GO:0006778,porphyrin-containing compound metabolic process|GO:0006779,porphyrin-containing compound biosynthetic process|GO:0044281,small molecule metabolic process|GO:1901362,organic cyclic compound biosynthetic process|GO:0015979,photosynthesis|GO:0071840,cellular component organization or biogenesis|GO:0044710,single-organism metabolic process|GO:0044711,single-organism biosynthetic process|GO…	GO:0055035,plastid thylakoid membrane|GO:0034357,photosynthetic membrane|GO:0031976,plastid thylakoid|GO:0043229,intracellular organelle|GO:0005622,intracellular|GO:0043227,membrane-bounded organelle|GO:0043226,organelle|GO:0031224,intrinsic component of membrane|GO:0009535,chloroplast thylakoid membrane|GO:0009534,chloroplast thylakoid|GO:0031984,organelle subcompartment|GO:0016021,integral comp…			http://www.uniprot.org/uniprot/Q8RXS1
1441	hypothetical protein POPTR_0013s15570g, partial	gi|566201513	0.37±0.24	Q9SG91	T7M13.6	GO:1902600,hydrogen ion transmembrane transport|GO:0044249,cellular biosynthetic process|GO:0006091,generation of precursor metabolites and energy|GO:0044699,single-organism process|GO:0044710,single-organism metabolic process|GO:0015992,proton transport|GO:0055114,oxidation-reduction process|GO:0051179,localization|GO:0022900,electron transport chain|GO:0098662,inorganic cation transmembrane tra…	GO:0044464,cell part|GO:1990204,oxidoreductase complex|GO:0043229,intracellular organelle|GO:0070069,cytochrome complex|GO:0043227,membrane-bounded organelle|GO:0043226,organelle|GO:0031224,intrinsic component of membrane|GO:0005737,cytoplasm|GO:0031090,organelle membrane|GO:0098796,membrane protein complex|GO:0016021,integral component of membrane|GO:0016020,membrane|GO:0098803,respiratory chain…	GO:0022891,substrate-specific transmembrane transporter activity|GO:0022890,inorganic cation transmembrane transporter activity|GO:0022892,substrate-specific transporter activity|GO:0005215,transporter activity|GO:0008324,cation transmembrane transporter activity|GO:0008121,ubiquinol-cytochrome-c reductase activity|GO:0022857,transmembrane transporter activity|GO:0015075,ion transmembrane transpo…		http://www.uniprot.org/uniprot/Q9SG91
1473	PREDICTED: nitronate monooxygenase	gi|743899657	10.33±7.96	Q24JJ8	GLO3	GO:0006950,response to stress|GO:0048584,positive regulation of response to stimulus|GO:0048583,regulation of response to stimulus|GO:0031349,positive regulation of defense response|GO:0044249,cellular biosynthetic process|GO:0023052,signaling|GO:0007165,signal transduction|GO:0050789,regulation of biological process|GO:0031347,regulation of defense response|GO:0044710,single-organism metabolic p…	GO:0005737,cytoplasm|GO:0043231,intracellular membrane-bounded organelle|GO:0044464,cell part|GO:0005777,peroxisome|GO:0044444,cytoplasmic part|GO:0005623,cell|GO:0005622,intracellular|GO:0042579,microbody|GO:0043229,intracellular organelle|GO:0044424,intracellular part|GO:0043227,membrane-bounded organelle|GO:0043226,organelle	GO:0003973,(S)-2-hydroxy-acid oxidase activity|GO:0005488,binding|GO:0000166,nucleotide binding|GO:1901363,heterocyclic compound binding|GO:1901265,nucleoside phosphate binding|GO:0016491,oxidoreductase activity|GO:0043168,anion binding|GO:0050662,coenzyme binding|GO:0052854,medium-chain-(S)-2-hydroxy-acid oxidase activity|GO:0052852,very-long-chain-(S)-2-hydroxy-acid oxidase activity|GO:0052853,…	ath00630,Glyoxylate and dicarboxylate metabolism|ath04146,Peroxisome|ath01110,Biosynthesis of secondary metabolites|ath01100,Metabolic pathways|ath01200,Carbon metabolism	http://www.uniprot.org/uniprot/Q24JJ8
1523	class III peroxidase	gi|591403292	2.17±0.6	Q9LE15	PER4	GO:0044248,cellular catabolic process|GO:0042744,hydrogen peroxide catabolic process|GO:0042743,hydrogen peroxide metabolic process|GO:0036294,cellular response to decreased oxygen levels|GO:0070887,cellular response to chemical stimulus|GO:0001666,response to hypoxia|GO:0044699,single-organism process|GO:0044712,single-organism catabolic process|GO:0044710,single-organism metabolic process|GO:00…	GO:0005576,extracellular region	GO:0043169,cation binding|GO:0046872,metal ion binding|GO:0020037,heme binding|GO:0046906,tetrapyrrole binding|GO:0097159,organic cyclic compound binding|GO:0016209,antioxidant activity|GO:0043167,ion binding|GO:1901363,heterocyclic compound binding|GO:0003824,catalytic activity|GO:0005488,binding|GO:0016684,oxidoreductase activity, acting on peroxide as acceptor|GO:0004601,peroxidase activity|GO…	ath00940,Phenylpropanoid biosynthesis|ath01100,Metabolic pathways|ath01110,Biosynthesis of secondary metabolites	http://www.uniprot.org/uniprot/Q9LE15
1534	PREDICTED: NAD(P)H-quinone oxidoreductase subunit N, organellar chromatophore	gi|743928583	0.34±0.14	Q9LVM2	ndhN	GO:0019222,regulation of metabolic process|GO:0009451,RNA modification|GO:0044281,small molecule metabolic process|GO:0015979,photosynthesis|GO:0071840,cellular component organization or biogenesis|GO:0044710,single-organism metabolic process|GO:0044711,single-organism biosynthetic process|GO:0042440,pigment metabolic process|GO:0043207,response to external biotic stimulus|GO:0010257,NADH dehydro…	GO:0055035,plastid thylakoid membrane|GO:0034357,photosynthetic membrane|GO:0031976,plastid thylakoid|GO:0031975,envelope|GO:0043229,intracellular organelle|GO:0009579,thylakoid|GO:0043227,membrane-bounded organelle|GO:0043226,organelle|GO:0009535,chloroplast thylakoid membrane|GO:0009534,chloroplast thylakoid|GO:0031984,organelle subcompartment|GO:0016020,membrane|GO:0044436,thylakoid part|GO:00…	GO:0005488,binding|GO:0003824,catalytic activity|GO:0016655,oxidoreductase activity, acting on NAD(P)H, quinone or similar compound as acceptor|GO:0048037,cofactor binding|GO:0016651,oxidoreductase activity, acting on NAD(P)H|GO:0048038,quinone binding|GO:0016491,oxidoreductase activity		http://www.uniprot.org/uniprot/Q9LVM2
1541	hypothetical protein POPTR_0004s22180g	gi|566167975	4.02±1.13	Q9FUP0	OPR3	GO:0009738,abscisic acid-activated signaling pathway|GO:0050794,regulation of cellular process|GO:0009694,jasmonic acid metabolic process|GO:0009695,jasmonic acid biosynthetic process|GO:0007165,signal transduction|GO:0044282,small molecule catabolic process|GO:0044283,small molecule biosynthetic process|GO:1901362,organic cyclic compound biosynthetic process|GO:1901360,organic cyclic compound me…	GO:0005737,cytoplasm|GO:0043231,intracellular membrane-bounded organelle|GO:0044464,cell part|GO:0005777,peroxisome|GO:0044444,cytoplasmic part|GO:0005623,cell|GO:0005622,intracellular|GO:0042579,microbody|GO:0043229,intracellular organelle|GO:0044424,intracellular part|GO:0043227,membrane-bounded organelle|GO:0043226,organelle	GO:0043168,anion binding|GO:0050662,coenzyme binding|GO:0016629,12-oxophytodienoate reductase activity|GO:0016628,oxidoreductase activity, acting on the CH-CH group of donors, NAD or NADP as acceptor|GO:0097367,carbohydrate derivative binding|GO:0097159,organic cyclic compound binding|GO:0016627,oxidoreductase activity, acting on the CH-CH group of donors|GO:0000166,nucleotide binding|GO:0036094,…	ath01110,Biosynthesis of secondary metabolites|ath01100,Metabolic pathways|ath00592,alpha-Linolenic acid metabolism	http://www.uniprot.org/uniprot/Q9FUP0
1546	PREDICTED: protein PROTON GRADIENT REGULATION 5, chloroplastic-like	gi|743938038	0.42±0.09	Q9SL05	PGR5	GO:0042221,response to chemical|GO:0010035,response to inorganic substance|GO:0071484,cellular response to light intensity|GO:0071482,cellular response to light stimulus|GO:0051234,establishment of localization|GO:0051049,regulation of transport|GO:0009416,response to light stimulus|GO:0009414,response to water deprivation|GO:0009415,response to water|GO:0006091,generation of precursor metabolite…	GO:0055035,plastid thylakoid membrane|GO:0034357,photosynthetic membrane|GO:0031976,plastid thylakoid|GO:0043229,intracellular organelle|GO:0009579,thylakoid|GO:0043227,membrane-bounded organelle|GO:0043226,organelle|GO:0009535,chloroplast thylakoid membrane|GO:0009534,chloroplast thylakoid|GO:0031984,organelle subcompartment|GO:0016020,membrane|GO:0044436,thylakoid part|GO:0044435,plastid part|G…	GO:0005488,binding|GO:0005515,protein binding|GO:0009055,electron carrier activity		http://www.uniprot.org/uniprot/Q9SL05
	oxidative photosynthetic carbon pathway
66	PREDICTED: glycerate dehydrogenase	gi|743906507	0.4±0.04	Q9C9W5	HPR	GO:0042221,response to chemical|GO:0009991,response to extracellular stimulus|GO:0071482,cellular response to light stimulus|GO:0009414,response to water deprivation|GO:0009314,response to radiation|GO:0071229,cellular response to acid chemical|GO:0044249,cellular biosynthetic process|GO:0009416,response to light stimulus|GO:0070887,cellular response to chemical stimulus|GO:0009415,response to wa…	GO:0005737,cytoplasm|GO:0043231,intracellular membrane-bounded organelle|GO:0044464,cell part|GO:0005777,peroxisome|GO:0044444,cytoplasmic part|GO:0005623,cell|GO:0005622,intracellular|GO:0042579,microbody|GO:0043229,intracellular organelle|GO:0044424,intracellular part|GO:0043227,membrane-bounded organelle|GO:0043226,organelle	GO:0050662,coenzyme binding|GO:0016614,oxidoreductase activity, acting on CH-OH group of donors|GO:0016616,oxidoreductase activity, acting on the CH-OH group of donors, NAD or NADP as acceptor|GO:0051287,NAD binding|GO:1901363,heterocyclic compound binding|GO:0000166,nucleotide binding|GO:0036094,small molecule binding|GO:0003824,catalytic activity|GO:0048037,cofactor binding|GO:0005488,binding|G…	ath00630,Glyoxylate and dicarboxylate metabolism|ath01110,Biosynthesis of secondary metabolites|ath00260,Glycine, serine and threonine metabolism|ath01100,Metabolic pathways|ath01200,Carbon metabolism	http://www.uniprot.org/uniprot/Q9C9W5
1473	PREDICTED: nitronate monooxygenase	gi|743899657	10.33±7.96	Q24JJ8	GLO3	GO:0006950,response to stress|GO:0048584,positive regulation of response to stimulus|GO:0048583,regulation of response to stimulus|GO:0031349,positive regulation of defense response|GO:0044249,cellular biosynthetic process|GO:0023052,signaling|GO:0007165,signal transduction|GO:0050789,regulation of biological process|GO:0031347,regulation of defense response|GO:0044710,single-organism metabolic p…	GO:0005737,cytoplasm|GO:0043231,intracellular membrane-bounded organelle|GO:0044464,cell part|GO:0005777,peroxisome|GO:0044444,cytoplasmic part|GO:0005623,cell|GO:0005622,intracellular|GO:0042579,microbody|GO:0043229,intracellular organelle|GO:0044424,intracellular part|GO:0043227,membrane-bounded organelle|GO:0043226,organelle	GO:0003973,(S)-2-hydroxy-acid oxidase activity|GO:0005488,binding|GO:0000166,nucleotide binding|GO:1901363,heterocyclic compound binding|GO:1901265,nucleoside phosphate binding|GO:0016491,oxidoreductase activity|GO:0043168,anion binding|GO:0050662,coenzyme binding|GO:0052854,medium-chain-(S)-2-hydroxy-acid oxidase activity|GO:0052852,very-long-chain-(S)-2-hydroxy-acid oxidase activity|GO:0052853,…	ath00630,Glyoxylate and dicarboxylate metabolism|ath04146,Peroxisome|ath01110,Biosynthesis of secondary metabolites|ath01100,Metabolic pathways|ath01200,Carbon metabolism	http://www.uniprot.org/uniprot/Q24JJ8
	oxidoreduction coenzyme metabolic process
41	PREDICTED: oxygen-evolving enhancer protein 1, chloroplastic	gi|743921083	0.12±0.01	Q9S841	PSBO2	GO:0008104,protein localization|GO:0019220,regulation of phosphate metabolic process|GO:0080090,regulation of primary metabolic process|GO:0019222,regulation of metabolic process|GO:0019682,glyceraldehyde-3-phosphate metabolic process|GO:0048585,negative regulation of response to stimulus|GO:0051667,establishment of plastid localization|GO:0048583,regulation of response to stimulus|GO:0031348,neg…	GO:0055035,plastid thylakoid membrane|GO:0034357,photosynthetic membrane|GO:0031976,plastid thylakoid|GO:0031977,thylakoid lumen|GO:0019898,extrinsic component of membrane|GO:0043229,intracellular organelle|GO:0005622,intracellular|GO:0009654,photosystem II oxygen evolving complex|GO:0043226,organelle|GO:0031224,intrinsic component of membrane|GO:0009535,chloroplast thylakoid membrane|GO:0009534,…	GO:0005488,binding|GO:0043169,cation binding|GO:0005515,protein binding|GO:0097159,organic cyclic compound binding|GO:0043167,ion binding|GO:0008266,poly(U) RNA binding|GO:0003727,single-stranded RNA binding|GO:0003723,RNA binding|GO:0003676,nucleic acid binding|GO:0008187,poly-pyrimidine tract binding|GO:0046872,metal ion binding|GO:1901363,heterocyclic compound binding|GO:0005509,calcium ion bi…	ath00195,Photosynthesis|ath01100,Metabolic pathways	http://www.uniprot.org/uniprot/Q9S841
42	PREDICTED: glyceraldehyde-3-phosphate dehydrogenase B, chloroplastic isoform X1	gi|743875087	0.32±0.03	P25857	GAPB	GO:0019685,photosynthesis, dark reaction|GO:0080090,regulation of primary metabolic process|GO:0019222,regulation of metabolic process|GO:0051049,regulation of transport|GO:0006778,porphyrin-containing compound metabolic process|GO:0006779,porphyrin-containing compound biosynthetic process|GO:0009409,response to cold|GO:0015977,carbon fixation|GO:0044281,small molecule metabolic process|GO:000963…	GO:0055035,plastid thylakoid membrane|GO:0034357,photosynthetic membrane|GO:0031976,plastid thylakoid|GO:0031975,envelope|GO:0048046,apoplast|GO:0043229,intracellular organelle|GO:0042170,plastid membrane|GO:0005622,intracellular|GO:0043227,membrane-bounded organelle|GO:0043226,organelle|GO:0009535,chloroplast thylakoid membrane|GO:0009534,chloroplast thylakoid|GO:0031984,organelle subcompartment…	GO:0050662,coenzyme binding|GO:0004365,glyceraldehyde-3-phosphate dehydrogenase (NAD+) (phosphorylating) activity|GO:0051287,NAD binding|GO:1901363,heterocyclic compound binding|GO:0043891,glyceraldehyde-3-phosphate dehydrogenase (NAD(P)+) (phosphorylating) activity|GO:0016620,oxidoreductase activity, acting on the aldehyde or oxo group of donors, NAD or NADP as acceptor|GO:0036094,small molecule…	ath00710,Carbon fixation in photosynthetic organisms|ath01100,Metabolic pathways|ath01200,Carbon metabolism	http://www.uniprot.org/uniprot/P25857
44	PREDICTED: enolase	gi|743896837	2.05±0.57	P25696	ENO2	GO:0080090,regulation of primary metabolic process|GO:0019222,regulation of metabolic process|GO:0019682,glyceraldehyde-3-phosphate metabolic process|GO:0009167,purine ribonucleoside monophosphate metabolic process|GO:0044281,small molecule metabolic process|GO:0009161,ribonucleoside monophosphate metabolic process|GO:1901362,organic cyclic compound biosynthetic process|GO:1901360,organic cyclic …	GO:0031975,envelope|GO:0048046,apoplast|GO:0043229,intracellular organelle|GO:0071944,cell periphery|GO:0043227,membrane-bounded organelle|GO:0043226,organelle|GO:0030054,cell junction|GO:0005737,cytoplasm|GO:0009536,plastid|GO:0005634,nucleus|GO:0016020,membrane|GO:0044444,cytoplasmic part|GO:0005739,mitochondrion|GO:0005576,extracellular region|GO:0043234,protein complex|GO:1902494,catalytic co…	GO:0043169,cation binding|GO:0046872,metal ion binding|GO:0046914,transition metal ion binding|GO:0043167,ion binding|GO:0016835,carbon-oxygen lyase activity|GO:0016836,hydro-lyase activity|GO:0000287,magnesium ion binding|GO:1901363,heterocyclic compound binding|GO:0004634,phosphopyruvate hydratase activity|GO:0003824,catalytic activity|GO:0005488,binding|GO:0003676,nucleic acid binding|GO:00036…	ath03018,RNA degradation|ath00010,Glycolysis / Gluconeogenesis|ath01230,Biosynthesis of amino acids|ath01200,Carbon metabolism|ath01110,Biosynthesis of secondary metabolites|ath01100,Metabolic pathways	http://www.uniprot.org/uniprot/P25696
89	PREDICTED: sedoheptulose-1,7-bisphosphatase, chloroplastic	gi|743879686	0.19±0.05	P46283	At3g55800	GO:0009595,detection of biotic stimulus|GO:0006520,cellular amino acid metabolic process|GO:0019220,regulation of phosphate metabolic process|GO:0080090,regulation of primary metabolic process|GO:0019222,regulation of metabolic process|GO:0006470,protein dephosphorylation|GO:0048585,negative regulation of response to stimulus|GO:0048583,regulation of response to stimulus|GO:0031348,negative regul…	GO:0031975,envelope|GO:0048046,apoplast|GO:0043229,intracellular organelle|GO:0043227,membrane-bounded organelle|GO:0043226,organelle|GO:0005737,cytoplasm|GO:0009941,chloroplast envelope|GO:0009536,plastid|GO:0009532,plastid stroma|GO:0009570,chloroplast stroma|GO:0044435,plastid part|GO:0044434,chloroplast part|GO:0009579,thylakoid|GO:0031967,organelle envelope|GO:0009507,chloroplast|GO:0009526,…	GO:0050308,sugar-phosphatase activity|GO:0019203,carbohydrate phosphatase activity|GO:0042132,fructose 1,6-bisphosphate 1-phosphatase activity|GO:0016791,phosphatase activity|GO:0016787,hydrolase activity|GO:0043169,cation binding|GO:0016788,hydrolase activity, acting on ester bonds|GO:0043167,ion binding|GO:0042578,phosphoric ester hydrolase activity|GO:0003824,catalytic activity|GO:0005488,bind…	ath00710,Carbon fixation in photosynthetic organisms|ath01100,Metabolic pathways|ath01200,Carbon metabolism	http://www.uniprot.org/uniprot/P46283
93	PREDICTED: ATP synthase gamma chain, chloroplastic	gi|743885735	0.41±0.07	Q01908	ATPC1	GO:0019220,regulation of phosphate metabolic process|GO:0080090,regulation of primary metabolic process|GO:0019222,regulation of metabolic process|GO:0019682,glyceraldehyde-3-phosphate metabolic process|GO:1901575,organic substance catabolic process|GO:0006778,porphyrin-containing compound metabolic process|GO:0006779,porphyrin-containing compound biosynthetic process|GO:0009694,jasmonic acid met…	GO:0055035,plastid thylakoid membrane|GO:0034357,photosynthetic membrane|GO:0031976,plastid thylakoid|GO:0031975,envelope|GO:0043229,intracellular organelle|GO:0009579,thylakoid|GO:0043227,membrane-bounded organelle|GO:0043226,organelle|GO:0009535,chloroplast thylakoid membrane|GO:0009534,chloroplast thylakoid|GO:0031984,organelle subcompartment|GO:0098807,chloroplast thylakoid membrane protein c…	GO:0036442,hydrogen-exporting ATPase activity|GO:0016887,ATPase activity|GO:0098772,molecular function regulator|GO:0042625,ATPase activity, coupled to transmembrane movement of ions|GO:0042626,ATPase activity, coupled to transmembrane movement of substances|GO:0016820,hydrolase activity, acting on acid anhydrides, catalyzing transmembrane movement of substances|GO:0046933,proton-transporting ATP…	ath00190,Oxidative phosphorylation|ath00195,Photosynthesis|ath01100,Metabolic pathways	http://www.uniprot.org/uniprot/Q01908
191	PREDICTED: cysteine synthase	gi|743919520	2.57±0.83	P47998	OASA1	GO:0048589,developmental growth|GO:0048588,developmental cell growth|GO:0048468,cell development|GO:0009167,purine ribonucleoside monophosphate metabolic process|GO:0044281,small molecule metabolic process|GO:0044283,small molecule biosynthetic process|GO:0009698,phenylpropanoid metabolic process|GO:0009699,phenylpropanoid biosynthetic process|GO:0071840,cellular component organization or biogene…	GO:0048046,apoplast|GO:0042579,microbody|GO:0043229,intracellular organelle|GO:0071944,cell periphery|GO:0043227,membrane-bounded organelle|GO:0043226,organelle|GO:0005737,cytoplasm|GO:0009536,plastid|GO:0031090,organelle membrane|GO:0009532,plastid stroma|GO:0005773,vacuole|GO:0009570,chloroplast stroma|GO:0005634,nucleus|GO:0016020,membrane|GO:0005777,peroxisome|GO:0005774,vacuolar membrane|GO:…	GO:0043168,anion binding|GO:0016835,carbon-oxygen lyase activity|GO:0016829,lyase activity|GO:0004124,cysteine synthase activity|GO:0043167,ion binding|GO:0003824,catalytic activity|GO:0016740,transferase activity|GO:0048037,cofactor binding|GO:0030170,pyridoxal phosphate binding|GO:0005515,protein binding|GO:0097159,organic cyclic compound binding|GO:1901363,heterocyclic compound binding|GO:0005…	ath00270,Cysteine and methionine metabolism|ath01230,Biosynthesis of amino acids|ath01200,Carbon metabolism|ath00920,Sulfur metabolism|ath01110,Biosynthesis of secondary metabolites|ath01100,Metabolic pathways	http://www.uniprot.org/uniprot/P47998
205	PREDICTED: probable fructose-bisphosphate aldolase 3, chloroplastic	gi|743889355	3.25±1.48	Q9ZU52	FBA3	GO:0009167,purine ribonucleoside monophosphate metabolic process|GO:0044281,small molecule metabolic process|GO:0009161,ribonucleoside monophosphate metabolic process|GO:1901360,organic cyclic compound metabolic process|GO:0044712,single-organism catabolic process|GO:0044710,single-organism metabolic process|GO:0010035,response to inorganic substance|GO:0009199,ribonucleoside triphosphate metabol…	GO:0031976,plastid thylakoid|GO:0043229,intracellular organelle|GO:0043227,membrane-bounded organelle|GO:0043226,organelle|GO:0009579,thylakoid|GO:0009534,chloroplast thylakoid|GO:0031984,organelle subcompartment|GO:0009532,plastid stroma|GO:0009570,chloroplast stroma|GO:0005739,mitochondrion|GO:0044435,plastid part|GO:0044434,chloroplast part|GO:0005737,cytoplasm|GO:0010287,plastoglobule|GO:0009…	GO:0016829,lyase activity|GO:0016830,carbon-carbon lyase activity|GO:0016832,aldehyde-lyase activity|GO:0003824,catalytic activity|GO:0004332,fructose-bisphosphate aldolase activity	ath00030,Pentose phosphate pathway|ath00710,Carbon fixation in photosynthetic organisms|ath00010,Glycolysis / Gluconeogenesis|ath00051,Fructose and mannose metabolism|ath01230,Biosynthesis of amino acids|ath01200,Carbon metabolism|ath01110,Biosynthesis of secondary metabolites|ath01100,Metabolic pathways	http://www.uniprot.org/uniprot/Q9ZU52
210	PREDICTED: uncharacterized protein LOC105123107	gi|743819545	2.03±0.56	Q9LYR4	T22N19_70	GO:0009167,purine ribonucleoside monophosphate metabolic process|GO:0044281,small molecule metabolic process|GO:0009161,ribonucleoside monophosphate metabolic process|GO:0009698,phenylpropanoid metabolic process|GO:0009699,phenylpropanoid biosynthetic process|GO:1901360,organic cyclic compound metabolic process|GO:0044712,single-organism catabolic process|GO:0044710,single-organism metabolic proc…	GO:0005737,cytoplasm|GO:0009536,plastid|GO:0043231,intracellular membrane-bounded organelle|GO:0009532,plastid stroma|GO:0009570,chloroplast stroma|GO:0005829,cytosol|GO:0044464,cell part|GO:0044444,cytoplasmic part|GO:0005739,mitochondrion|GO:0005622,intracellular|GO:0044446,intracellular organelle part|GO:0043229,intracellular organelle|GO:0005623,cell|GO:0044435,plastid part|GO:0044434,chlorop…	GO:0003824,catalytic activity|GO:0016740,transferase activity|GO:0004801,sedoheptulose-7-phosphate:D-glyceraldehyde-3-phosphate glyceronetransferase activity|GO:0016744,transferase activity, transferring aldehyde or ketonic groups	ath00030,Pentose phosphate pathway|ath01230,Biosynthesis of amino acids|ath01100,Metabolic pathways|ath01200,Carbon metabolism|ath01110,Biosynthesis of secondary metabolites	http://www.uniprot.org/uniprot/Q9LYR4
223	hypothetical protein POPTR_0009s14500g	gi|566187985	0.48±0.04	Q1H537	DVR	GO:0080090,regulation of primary metabolic process|GO:0019222,regulation of metabolic process|GO:0019682,glyceraldehyde-3-phosphate metabolic process|GO:0006778,porphyrin-containing compound metabolic process|GO:0006779,porphyrin-containing compound biosynthetic process|GO:0044281,small molecule metabolic process|GO:0044283,small molecule biosynthetic process|GO:1901362,organic cyclic compound bi…	GO:0031976,plastid thylakoid|GO:0031975,envelope|GO:0043229,intracellular organelle|GO:0043227,membrane-bounded organelle|GO:0043226,organelle|GO:0005737,cytoplasm|GO:0009534,chloroplast thylakoid|GO:0031984,organelle subcompartment|GO:0016020,membrane|GO:0044435,plastid part|GO:0044434,chloroplast part|GO:0009579,thylakoid|GO:0009941,chloroplast envelope|GO:0031967,organelle envelope|GO:0009536,…	GO:0016628,oxidoreductase activity, acting on the CH-CH group of donors, NAD or NADP as acceptor|GO:0016627,oxidoreductase activity, acting on the CH-CH group of donors|GO:0033728,divinyl chlorophyllide a 8-vinyl-reductase activity|GO:0003824,catalytic activity|GO:0051744,3,8-divinyl protochlorophyllide a 8-vinyl reductase activity|GO:0016491,oxidoreductase activity	ath00860,Porphyrin and chlorophyll metabolism|ath01110,Biosynthesis of secondary metabolites|ath01100,Metabolic pathways	http://www.uniprot.org/uniprot/Q1H537
224	PREDICTED: pyruvate dehydrogenase E1 component subunit alpha, mitochondrial-like	gi|743924958	3.1±0.27	P52901	E1 ALPHA	GO:0009185,ribonucleoside diphosphate metabolic process|GO:0010035,response to inorganic substance|GO:0010038,response to metal ion|GO:0006732,coenzyme metabolic process|GO:0009141,nucleoside triphosphate metabolic process|GO:0009144,purine nucleoside triphosphate metabolic process|GO:0019752,carboxylic acid metabolic process|GO:0044723,single-organism carbohydrate metabolic process|GO:0034641,ce…	GO:0005737,cytoplasm|GO:0005829,cytosol|GO:0043231,intracellular membrane-bounded organelle|GO:0043233,organelle lumen|GO:0005634,nucleus|GO:0044464,cell part|GO:0044444,cytoplasmic part|GO:0031974,membrane-enclosed lumen|GO:0005622,intracellular|GO:0044446,intracellular organelle part|GO:0070013,intracellular organelle lumen|GO:0043229,intracellular organelle|GO:0005739,mitochondrion|GO:0044429,…	GO:0004738,pyruvate dehydrogenase activity|GO:0004739,pyruvate dehydrogenase (acetyl-transferring) activity|GO:0016624,oxidoreductase activity, acting on the aldehyde or oxo group of donors, disulfide as acceptor|GO:0003824,catalytic activity|GO:0016903,oxidoreductase activity, acting on the aldehyde or oxo group of donors|GO:0016491,oxidoreductase activity	ath00620,Pyruvate metabolism|ath00020,Citrate cycle (TCA cycle)|ath00010,Glycolysis / Gluconeogenesis|ath01200,Carbon metabolism|ath01110,Biosynthesis of secondary metabolites|ath01100,Metabolic pathways	http://www.uniprot.org/uniprot/P52901
240	PREDICTED: citrate synthase, mitochondrial isoform X4	gi|743916626	3.61±0.77	P20115	CSY4	GO:0009185,ribonucleoside diphosphate metabolic process|GO:0010035,response to inorganic substance|GO:0010038,response to metal ion|GO:0006732,coenzyme metabolic process|GO:0009141,nucleoside triphosphate metabolic process|GO:0009144,purine nucleoside triphosphate metabolic process|GO:0019752,carboxylic acid metabolic process|GO:0043436,oxoacid metabolic process|GO:0006099,tricarboxylic acid cycl…	GO:0031974,membrane-enclosed lumen|GO:0043229,intracellular organelle|GO:0071944,cell periphery|GO:0043227,membrane-bounded organelle|GO:0043226,organelle|GO:0005737,cytoplasm|GO:0009536,plastid|GO:0005618,cell wall|GO:0005739,mitochondrion|GO:0005759,mitochondrial matrix|GO:0005794,Golgi apparatus|GO:0030312,external encapsulating structure|GO:0012505,endomembrane system|GO:0009507,chloroplast|G…	GO:0035639,purine ribonucleoside triphosphate binding|GO:0036440,citrate synthase activity|GO:0008270,zinc ion binding|GO:0043167,ion binding|GO:1901363,heterocyclic compound binding|GO:1901265,nucleoside phosphate binding|GO:0001882,nucleoside binding|GO:0046912,transferase activity, transferring acyl groups, acyl groups converted into alkyl on transfer|GO:0043169,cation binding|GO:0046914,trans…	ath00630,Glyoxylate and dicarboxylate metabolism|ath00020,Citrate cycle (TCA cycle)|ath01210,2-Oxocarboxylic acid metabolism|ath01230,Biosynthesis of amino acids|ath01200,Carbon metabolism|ath01110,Biosynthesis of secondary metabolites|ath01100,Metabolic pathways	http://www.uniprot.org/uniprot/P20115
301	PREDICTED: ribulose-phosphate 3-epimerase, chloroplastic	gi|743907505	0.35±0.06	Q9SAU2	RPE	GO:0019321,pentose metabolic process|GO:0009607,response to biotic stimulus|GO:0019323,pentose catabolic process|GO:0006739,NADP metabolic process|GO:0046365,monosaccharide catabolic process|GO:0006733,oxidoreduction coenzyme metabolic process|GO:0044723,single-organism carbohydrate metabolic process|GO:0034641,cellular nitrogen compound metabolic process|GO:0006098,pentose-phosphate shunt|GO:004…	GO:0031975,envelope|GO:0048046,apoplast|GO:0043229,intracellular organelle|GO:0043227,membrane-bounded organelle|GO:0043226,organelle|GO:0005737,cytoplasm|GO:0009941,chloroplast envelope|GO:0009536,plastid|GO:0009532,plastid stroma|GO:0009570,chloroplast stroma|GO:0010319,stromule|GO:0044435,plastid part|GO:0044434,chloroplast part|GO:0009579,thylakoid|GO:0031967,organelle envelope|GO:0009507,chl…	GO:0016857,racemase and epimerase activity, acting on carbohydrates and derivatives|GO:0016854,racemase and epimerase activity|GO:0016853,isomerase activity|GO:0043169,cation binding|GO:0043167,ion binding|GO:0003824,catalytic activity|GO:0005488,binding|GO:0004750,ribulose-phosphate 3-epimerase activity|GO:0046872,metal ion binding	ath00030,Pentose phosphate pathway|ath00710,Carbon fixation in photosynthetic organisms|ath01230,Biosynthesis of amino acids|ath00040,Pentose and glucuronate interconversions|ath01200,Carbon metabolism|ath01110,Biosynthesis of secondary metabolites|ath01100,Metabolic pathways	http://www.uniprot.org/uniprot/Q9SAU2
326	hypothetical protein POPTR_0013s15730g	gi|566201546	0.39±0.16	Q9LEV3	CBSX3	GO:0009167,purine ribonucleoside monophosphate metabolic process|GO:0044281,small molecule metabolic process|GO:0009161,ribonucleoside monophosphate metabolic process|GO:1901360,organic cyclic compound metabolic process|GO:0044712,single-organism catabolic process|GO:0044710,single-organism metabolic process|GO:0010035,response to inorganic substance|GO:0010256,endomembrane system organization|GO…	GO:0005737,cytoplasm|GO:0043231,intracellular membrane-bounded organelle|GO:0044464,cell part|GO:0043229,intracellular organelle|GO:0005739,mitochondrion|GO:0005622,intracellular|GO:0044444,cytoplasmic part|GO:0005623,cell|GO:0044424,intracellular part|GO:0043227,membrane-bounded organelle|GO:0043226,organelle	GO:0043169,cation binding|GO:0046914,transition metal ion binding|GO:0050897,cobalt ion binding|GO:0043167,ion binding|GO:0005488,binding|GO:0046872,metal ion binding		http://www.uniprot.org/uniprot/Q9LEV3
331	hypothetical protein POPTR_0001s25160g	gi|224059444	0.42±0.11	Q9STF2	T6H20.190	GO:0006778,porphyrin-containing compound metabolic process|GO:0006779,porphyrin-containing compound biosynthetic process|GO:0061024,membrane organization|GO:0044281,small molecule metabolic process|GO:0051656,establishment of organelle localization|GO:1901362,organic cyclic compound biosynthetic process|GO:0015979,photosynthesis|GO:0071840,cellular component organization or biogenesis|GO:0044710,…	GO:0055035,plastid thylakoid membrane|GO:0034357,photosynthetic membrane|GO:0031976,plastid thylakoid|GO:0031975,envelope|GO:0043229,intracellular organelle|GO:0043228,non-membrane-bounded organelle|GO:0042646,plastid nucleoid|GO:0000229,cytoplasmic chromosome|GO:0043227,membrane-bounded organelle|GO:0043226,organelle|GO:0009535,chloroplast thylakoid membrane|GO:0009534,chloroplast thylakoid|GO:0…			http://www.uniprot.org/uniprot/Q9STF2
402	PREDICTED: probable aldo-keto reductase 2	gi|743912326	2.11±0.71	Q93ZN2	At1g60710	GO:0080090,regulation of primary metabolic process|GO:0019222,regulation of metabolic process|GO:0009167,purine ribonucleoside monophosphate metabolic process|GO:0044281,small molecule metabolic process|GO:0009161,ribonucleoside monophosphate metabolic process|GO:0009698,phenylpropanoid metabolic process|GO:0009699,phenylpropanoid biosynthetic process|GO:1901360,organic cyclic compound metabolic …	GO:0005737,cytoplasm|GO:0005829,cytosol|GO:0044464,cell part|GO:0005623,cell|GO:0005622,intracellular|GO:0044444,cytoplasmic part|GO:0044424,intracellular part	GO:0003824,catalytic activity|GO:0016491,oxidoreductase activity		http://www.uniprot.org/uniprot/Q93ZN2
449	PREDICTED: probable pyridoxal biosynthesis protein PDX1	gi|743811825	0.43±0.05	Q8L940	PDX13	GO:0019222,regulation of metabolic process|GO:0010335,response to non-ionic osmotic stress|GO:0006778,porphyrin-containing compound metabolic process|GO:0044281,small molecule metabolic process|GO:0044283,small molecule biosynthetic process|GO:1901362,organic cyclic compound biosynthetic process|GO:1901360,organic cyclic compound metabolic process|GO:0044710,single-organism metabolic process|GO:0…	GO:0005737,cytoplasm|GO:0005829,cytosol|GO:0016020,membrane|GO:0044464,cell part|GO:0005623,cell|GO:0005622,intracellular|GO:0044444,cytoplasmic part|GO:0071944,cell periphery|GO:0012505,endomembrane system|GO:0005886,plasma membrane|GO:0044424,intracellular part	GO:0036381,pyridoxal 5'-phosphate synthase (glutamine hydrolysing) activity|GO:0016840,carbon-nitrogen lyase activity|GO:0016843,amine-lyase activity|GO:0016829,lyase activity|GO:0003824,catalytic activity|GO:0005488,binding|GO:0005515,protein binding|GO:0046983,protein dimerization activity|GO:0046982,protein heterodimerization activity|GO:0042802,identical protein binding|GO:0042803,protein hom…	ath00750,Vitamin B6 metabolism	http://www.uniprot.org/uniprot/Q8L940
506	PREDICTED: fructose-1,6-bisphosphatase, chloroplastic-like	gi|743937119	0.46±0.01	P25851	FBP	GO:0019220,regulation of phosphate metabolic process|GO:0080090,regulation of primary metabolic process|GO:0019222,regulation of metabolic process|GO:0006470,protein dephosphorylation|GO:0006778,porphyrin-containing compound metabolic process|GO:0006779,porphyrin-containing compound biosynthetic process|GO:0061024,membrane organization|GO:0015977,carbon fixation|GO:0044281,small molecule metaboli…	GO:0031975,envelope|GO:0048046,apoplast|GO:0043229,intracellular organelle|GO:0043227,membrane-bounded organelle|GO:0043226,organelle|GO:0005737,cytoplasm|GO:0009536,plastid|GO:0009532,plastid stroma|GO:0009570,chloroplast stroma|GO:0010319,stromule|GO:0044435,plastid part|GO:0044434,chloroplast part|GO:0031967,organelle envelope|GO:0009507,chloroplast|GO:0009526,plastid envelope|GO:0043231,intra…	GO:0050308,sugar-phosphatase activity|GO:0019203,carbohydrate phosphatase activity|GO:0042132,fructose 1,6-bisphosphate 1-phosphatase activity|GO:0016791,phosphatase activity|GO:0016787,hydrolase activity|GO:0043169,cation binding|GO:0016788,hydrolase activity, acting on ester bonds|GO:0043167,ion binding|GO:0042578,phosphoric ester hydrolase activity|GO:0003824,catalytic activity|GO:0005488,bind…	ath00030,Pentose phosphate pathway|ath00710,Carbon fixation in photosynthetic organisms|ath00010,Glycolysis / Gluconeogenesis|ath00051,Fructose and mannose metabolism|ath01200,Carbon metabolism|ath01110,Biosynthesis of secondary metabolites|ath01100,Metabolic pathways	http://www.uniprot.org/uniprot/P25851
579	O2 evolving complex 33kD family protein	gi|224094610	0.23±0.17	Q9S841	PSBO2	GO:0008104,protein localization|GO:0019220,regulation of phosphate metabolic process|GO:0080090,regulation of primary metabolic process|GO:0019222,regulation of metabolic process|GO:0019682,glyceraldehyde-3-phosphate metabolic process|GO:0048585,negative regulation of response to stimulus|GO:0051667,establishment of plastid localization|GO:0048583,regulation of response to stimulus|GO:0031348,neg…	GO:0055035,plastid thylakoid membrane|GO:0034357,photosynthetic membrane|GO:0031976,plastid thylakoid|GO:0031977,thylakoid lumen|GO:0019898,extrinsic component of membrane|GO:0043229,intracellular organelle|GO:0005622,intracellular|GO:0009654,photosystem II oxygen evolving complex|GO:0043226,organelle|GO:0031224,intrinsic component of membrane|GO:0009535,chloroplast thylakoid membrane|GO:0009534,…	GO:0005488,binding|GO:0043169,cation binding|GO:0005515,protein binding|GO:0097159,organic cyclic compound binding|GO:0043167,ion binding|GO:0008266,poly(U) RNA binding|GO:0003727,single-stranded RNA binding|GO:0003723,RNA binding|GO:0003676,nucleic acid binding|GO:0008187,poly-pyrimidine tract binding|GO:0046872,metal ion binding|GO:1901363,heterocyclic compound binding|GO:0005509,calcium ion bi…	ath00195,Photosynthesis|ath01100,Metabolic pathways	http://www.uniprot.org/uniprot/Q9S841
620	hypothetical protein POPTR_0004s05340g	gi|566165056	0.28±0.05	Q9ZP06	At1g53240	GO:0009167,purine ribonucleoside monophosphate metabolic process|GO:0044281,small molecule metabolic process|GO:0009161,ribonucleoside monophosphate metabolic process|GO:0072350,tricarboxylic acid metabolic process|GO:0071840,cellular component organization or biogenesis|GO:0044712,single-organism catabolic process|GO:0044710,single-organism metabolic process|GO:0044711,single-organism biosynthet…	GO:0031974,membrane-enclosed lumen|GO:0048046,apoplast|GO:0043229,intracellular organelle|GO:0071944,cell periphery|GO:0043227,membrane-bounded organelle|GO:0043226,organelle|GO:0005737,cytoplasm|GO:0009536,plastid|GO:0005618,cell wall|GO:0005739,mitochondrion|GO:0005759,mitochondrial matrix|GO:0005794,Golgi apparatus|GO:0030312,external encapsulating structure|GO:0012505,endomembrane system|GO:0…	GO:0043169,cation binding|GO:0046872,metal ion binding|GO:0016614,oxidoreductase activity, acting on CH-OH group of donors|GO:0016615,malate dehydrogenase activity|GO:0016616,oxidoreductase activity, acting on the CH-OH group of donors, NAD or NADP as acceptor|GO:0043167,ion binding|GO:0046914,transition metal ion binding|GO:0003824,catalytic activity|GO:0030060,L-malate dehydrogenase activity|GO…	ath00630,Glyoxylate and dicarboxylate metabolism|ath00620,Pyruvate metabolism|ath00020,Citrate cycle (TCA cycle)|ath00270,Cysteine and methionine metabolism|ath00710,Carbon fixation in photosynthetic organisms|ath01200,Carbon metabolism|ath01110,Biosynthesis of secondary metabolites|ath01100,Metabolic pathways	http://www.uniprot.org/uniprot/Q9ZP06
696	hypothetical protein POPTR_0016s00290g	gi|566207873	0.41±0.35	Q9LM13	F16L1.10	GO:0009185,ribonucleoside diphosphate metabolic process|GO:0006732,coenzyme metabolic process|GO:0009141,nucleoside triphosphate metabolic process|GO:0009144,purine nucleoside triphosphate metabolic process|GO:0019752,carboxylic acid metabolic process|GO:0044723,single-organism carbohydrate metabolic process|GO:0034641,cellular nitrogen compound metabolic process|GO:0006807,nitrogen compound meta…		GO:0016853,isomerase activity|GO:0003824,catalytic activity|GO:0016868,intramolecular transferase activity, phosphotransferases|GO:0016866,intramolecular transferase activity|GO:0004619,phosphoglycerate mutase activity	ath00260,Glycine, serine and threonine metabolism|ath00010,Glycolysis / Gluconeogenesis|ath01230,Biosynthesis of amino acids|ath01200,Carbon metabolism|ath01110,Biosynthesis of secondary metabolites|ath01100,Metabolic pathways	http://www.uniprot.org/uniprot/Q9LM13
751	phosphomannomutase family protein	gi|566203118	0.43±0.29	P56779	psbE	GO:0044710,single-organism metabolic process|GO:0019684,photosynthesis, light reaction|GO:0009987,cellular process|GO:0044237,cellular metabolic process|GO:0022900,electron transport chain|GO:0044763,single-organism cellular process|GO:0055114,oxidation-reduction process|GO:0008152,metabolic process|GO:0006091,generation of precursor metabolites and energy|GO:0015979,photosynthesis|GO:0044699,sin…	GO:0055035,plastid thylakoid membrane|GO:0034357,photosynthetic membrane|GO:0031976,plastid thylakoid|GO:0043229,intracellular organelle|GO:0005622,intracellular|GO:0043227,membrane-bounded organelle|GO:0043226,organelle|GO:0031224,intrinsic component of membrane|GO:0009535,chloroplast thylakoid membrane|GO:0009534,chloroplast thylakoid|GO:0031984,organelle subcompartment|GO:0016021,integral comp…	GO:0043169,cation binding|GO:0020037,heme binding|GO:0046914,transition metal ion binding|GO:0046906,tetrapyrrole binding|GO:0097159,organic cyclic compound binding|GO:0043167,ion binding|GO:0005488,binding|GO:0005506,iron ion binding|GO:0046872,metal ion binding|GO:1901363,heterocyclic compound binding|GO:0009055,electron carrier activity	ath00195,Photosynthesis|ath01100,Metabolic pathways	http://www.uniprot.org/uniprot/P56779
857	PREDICTED: fructose-bisphosphate aldolase, cytoplasmic isozyme 1-like	gi|743912840	0.33±0.17	O65581	M3E9.40	GO:0009167,purine ribonucleoside monophosphate metabolic process|GO:0044281,small molecule metabolic process|GO:0009161,ribonucleoside monophosphate metabolic process|GO:1901360,organic cyclic compound metabolic process|GO:0044712,single-organism catabolic process|GO:0044710,single-organism metabolic process|GO:0044711,single-organism biosynthetic process|GO:0042440,pigment metabolic process|GO:0…	GO:0005737,cytoplasm|GO:0009536,plastid|GO:0043231,intracellular membrane-bounded organelle|GO:0044464,cell part|GO:0044444,cytoplasmic part|GO:0005623,cell|GO:0005622,intracellular|GO:0043229,intracellular organelle|GO:0044424,intracellular part|GO:0043227,membrane-bounded organelle|GO:0043226,organelle|GO:0009507,chloroplast	GO:0016829,lyase activity|GO:0016830,carbon-carbon lyase activity|GO:0016832,aldehyde-lyase activity|GO:0003824,catalytic activity|GO:0004332,fructose-bisphosphate aldolase activity	ath00030,Pentose phosphate pathway|ath00710,Carbon fixation in photosynthetic organisms|ath00010,Glycolysis / Gluconeogenesis|ath00051,Fructose and mannose metabolism|ath01230,Biosynthesis of amino acids|ath01200,Carbon metabolism|ath01110,Biosynthesis of secondary metabolites|ath01100,Metabolic pathways	http://www.uniprot.org/uniprot/O65581
871	PREDICTED: uncharacterized protein LOC105129868	gi|743858290	0.41±0.01	Q93V74	At4g34180	GO:0008104,protein localization|GO:0051234,establishment of localization|GO:0009167,purine ribonucleoside monophosphate metabolic process|GO:0006569,tryptophan catabolic process|GO:0044282,small molecule catabolic process|GO:0009161,ribonucleoside monophosphate metabolic process|GO:0071840,cellular component organization or biogenesis|GO:1901361,organic cyclic compound catabolic process|GO:004471…	GO:0005737,cytoplasm|GO:0005794,Golgi apparatus|GO:0005783,endoplasmic reticulum|GO:0005618,cell wall|GO:0044464,cell part|GO:0044444,cytoplasmic part|GO:0005623,cell|GO:0030312,external encapsulating structure|GO:0043229,intracellular organelle|GO:0071944,cell periphery|GO:0012505,endomembrane system|GO:0044424,intracellular part|GO:0005622,intracellular|GO:0043227,membrane-bounded organelle|GO:…	GO:0016787,hydrolase activity|GO:0016810,hydrolase activity, acting on carbon-nitrogen (but not peptide) bonds|GO:0016811,hydrolase activity, acting on carbon-nitrogen (but not peptide) bonds, in linear amides|GO:0003824,catalytic activity|GO:0004061,arylformamidase activity		http://www.uniprot.org/uniprot/Q93V74
881	PREDICTED: aspartic proteinase A1-like	gi|743906614	2.26±0.18	O65390	APA1	GO:0008104,protein localization|GO:0009167,purine ribonucleoside monophosphate metabolic process|GO:0044281,small molecule metabolic process|GO:0009161,ribonucleoside monophosphate metabolic process|GO:0071840,cellular component organization or biogenesis|GO:0044712,single-organism catabolic process|GO:0044710,single-organism metabolic process|GO:0010035,response to inorganic substance|GO:0070727…	GO:0005737,cytoplasm|GO:0043231,intracellular membrane-bounded organelle|GO:0005773,vacuole|GO:0005829,cytosol|GO:0044464,cell part|GO:0044444,cytoplasmic part|GO:0005623,cell|GO:0005622,intracellular|GO:0055044,symplast|GO:0043229,intracellular organelle|GO:0030054,cell junction|GO:0005911,cell-cell junction|GO:0044424,intracellular part|GO:0043227,membrane-bounded organelle|GO:0043226,organelle…	GO:0016787,hydrolase activity|GO:0004175,endopeptidase activity|GO:0070001,aspartic-type peptidase activity|GO:0003824,catalytic activity|GO:0070011,peptidase activity, acting on L-amino acid peptides|GO:0004190,aspartic-type endopeptidase activity|GO:0008233,peptidase activity		http://www.uniprot.org/uniprot/O65390
936	PREDICTED: uncharacterized protein LOC105116519	gi|743935689	0.33±0.15	O49317	At2g33180	GO:0080090,regulation of primary metabolic process|GO:0019222,regulation of metabolic process|GO:0019682,glyceraldehyde-3-phosphate metabolic process|GO:0044281,small molecule metabolic process|GO:0044283,small molecule biosynthetic process|GO:1901362,organic cyclic compound biosynthetic process|GO:0071840,cellular component organization or biogenesis|GO:0044710,single-organism metabolic process|…	GO:0005737,cytoplasm|GO:0009536,plastid|GO:0043231,intracellular membrane-bounded organelle|GO:0009532,plastid stroma|GO:0009570,chloroplast stroma|GO:0044464,cell part|GO:0044444,cytoplasmic part|GO:0005623,cell|GO:0005622,intracellular|GO:0044446,intracellular organelle part|GO:0043229,intracellular organelle|GO:0044435,plastid part|GO:0044434,chloroplast part|GO:0044424,intracellular part|GO:0…			http://www.uniprot.org/uniprot/O49317
964	hypothetical protein POPTR_0003s13230g	gi|224075014	0.45±0.17	Q9CAK8	ISPF	GO:0080090,regulation of primary metabolic process|GO:0019222,regulation of metabolic process|GO:0051049,regulation of transport|GO:0006778,porphyrin-containing compound metabolic process|GO:0006779,porphyrin-containing compound biosynthetic process|GO:0061024,membrane organization|GO:0044281,small molecule metabolic process|GO:0044283,small molecule biosynthetic process|GO:1901362,organic cyclic…	GO:0005737,cytoplasm|GO:0009536,plastid|GO:0043231,intracellular membrane-bounded organelle|GO:0009532,plastid stroma|GO:0009570,chloroplast stroma|GO:0044464,cell part|GO:0044444,cytoplasmic part|GO:0005623,cell|GO:0005622,intracellular|GO:0044446,intracellular organelle part|GO:0043229,intracellular organelle|GO:0044435,plastid part|GO:0044434,chloroplast part|GO:0044424,intracellular part|GO:0…	GO:0043169,cation binding|GO:0008685,2-C-methyl-D-erythritol 2,4-cyclodiphosphate synthase activity|GO:0016829,lyase activity|GO:0016849,phosphorus-oxygen lyase activity|GO:0043167,ion binding|GO:0003824,catalytic activity|GO:0005488,binding|GO:0046872,metal ion binding	ath01110,Biosynthesis of secondary metabolites|ath01100,Metabolic pathways|ath00900,Terpenoid backbone biosynthesis	http://www.uniprot.org/uniprot/Q9CAK8
996	PREDICTED: ATP synthase subunit b', chloroplastic-like	gi|743881832	0.4±0.22	Q42139	F10M6.100	GO:0009595,detection of biotic stimulus|GO:0008104,protein localization|GO:0019220,regulation of phosphate metabolic process|GO:0080090,regulation of primary metabolic process|GO:0019222,regulation of metabolic process|GO:0006470,protein dephosphorylation|GO:0048585,negative regulation of response to stimulus|GO:0048583,regulation of response to stimulus|GO:0031348,negative regulation of defense …	GO:0055035,plastid thylakoid membrane|GO:0034357,photosynthetic membrane|GO:0031976,plastid thylakoid|GO:0031975,envelope|GO:0043229,intracellular organelle|GO:0009579,thylakoid|GO:0043227,membrane-bounded organelle|GO:0043226,organelle|GO:0031224,intrinsic component of membrane|GO:0009535,chloroplast thylakoid membrane|GO:0009534,chloroplast thylakoid|GO:0045263,proton-transporting ATP synthase …	GO:0022891,substrate-specific transmembrane transporter activity|GO:0022890,inorganic cation transmembrane transporter activity|GO:0022892,substrate-specific transporter activity|GO:0016787,hydrolase activity|GO:0005215,transporter activity|GO:0008324,cation transmembrane transporter activity|GO:0022857,transmembrane transporter activity|GO:0015075,ion transmembrane transporter activity|GO:000382…	ath00190,Oxidative phosphorylation|ath00195,Photosynthesis|ath01100,Metabolic pathways	http://www.uniprot.org/uniprot/Q42139
1047	Mitogen-activated protein kinase 4	gi|224067920	0.47±0.02	Q39024	MPK4	GO:0009595,detection of biotic stimulus|GO:0048467,gynoecium development|GO:0019220,regulation of phosphate metabolic process|GO:0080090,regulation of primary metabolic process|GO:0019222,regulation of metabolic process|GO:0006470,protein dephosphorylation|GO:0048585,negative regulation of response to stimulus|GO:0032260,response to jasmonic acid stimulus involved in jasmonic acid and ethylene-de…	GO:0043229,intracellular organelle|GO:0043228,non-membrane-bounded organelle|GO:0043227,membrane-bounded organelle|GO:0043226,organelle|GO:0005856,cytoskeleton|GO:0005874,microtubule|GO:0005634,nucleus|GO:0044430,cytoskeletal part|GO:0005737,cytoplasm|GO:0015630,microtubule cytoskeleton|GO:0009504,cell plate|GO:0043234,protein complex|GO:0032991,macromolecular complex|GO:0043231,intracellular mem…	GO:0035639,purine ribonucleoside triphosphate binding|GO:0060089,molecular transducer activity|GO:0005488,binding|GO:0004871,signal transducer activity|GO:0043167,ion binding|GO:1901363,heterocyclic compound binding|GO:0001883,purine nucleoside binding|GO:0001882,nucleoside binding|GO:0043168,anion binding|GO:0005057,receptor signaling protein activity|GO:0032549,ribonucleoside binding|GO:0000166…	ath04626,Plant-pathogen interaction|ath04933,AGE-RAGE signaling pathway in diabetic complications	http://www.uniprot.org/uniprot/Q39024
1097	PREDICTED: endo-1,3;1,4-beta-D-glucanase-like	gi|743931981	0.43±0.1	Q9LUG8	At3g23600	GO:0009167,purine ribonucleoside monophosphate metabolic process|GO:0044281,small molecule metabolic process|GO:0009161,ribonucleoside monophosphate metabolic process|GO:1901360,organic cyclic compound metabolic process|GO:0044712,single-organism catabolic process|GO:0044710,single-organism metabolic process|GO:0010035,response to inorganic substance|GO:0010256,endomembrane system organization|GO…	GO:0005737,cytoplasm|GO:0005829,cytosol|GO:0043231,intracellular membrane-bounded organelle|GO:0005634,nucleus|GO:0016020,membrane|GO:0044464,cell part|GO:0044444,cytoplasmic part|GO:0005623,cell|GO:0005622,intracellular|GO:0048046,apoplast|GO:0043229,intracellular organelle|GO:0071944,cell periphery|GO:0005886,plasma membrane|GO:0044424,intracellular part|GO:0043227,membrane-bounded organelle|GO…	GO:0016787,hydrolase activity|GO:0003824,catalytic activity		http://www.uniprot.org/uniprot/Q9LUG8
1098	hypothetical protein POPTR_0016s11621g	gi|566209778	0.39±0.1	P25851	FBP	GO:0019220,regulation of phosphate metabolic process|GO:0080090,regulation of primary metabolic process|GO:0019222,regulation of metabolic process|GO:0006470,protein dephosphorylation|GO:0006778,porphyrin-containing compound metabolic process|GO:0006779,porphyrin-containing compound biosynthetic process|GO:0061024,membrane organization|GO:0015977,carbon fixation|GO:0044281,small molecule metaboli…	GO:0031975,envelope|GO:0048046,apoplast|GO:0043229,intracellular organelle|GO:0043227,membrane-bounded organelle|GO:0043226,organelle|GO:0005737,cytoplasm|GO:0009536,plastid|GO:0009532,plastid stroma|GO:0009570,chloroplast stroma|GO:0010319,stromule|GO:0044435,plastid part|GO:0044434,chloroplast part|GO:0031967,organelle envelope|GO:0009507,chloroplast|GO:0009526,plastid envelope|GO:0043231,intra…	GO:0050308,sugar-phosphatase activity|GO:0019203,carbohydrate phosphatase activity|GO:0042132,fructose 1,6-bisphosphate 1-phosphatase activity|GO:0016791,phosphatase activity|GO:0016787,hydrolase activity|GO:0043169,cation binding|GO:0016788,hydrolase activity, acting on ester bonds|GO:0043167,ion binding|GO:0042578,phosphoric ester hydrolase activity|GO:0003824,catalytic activity|GO:0005488,bind…	ath00030,Pentose phosphate pathway|ath00710,Carbon fixation in photosynthetic organisms|ath00010,Glycolysis / Gluconeogenesis|ath00051,Fructose and mannose metabolism|ath01200,Carbon metabolism|ath01110,Biosynthesis of secondary metabolites|ath01100,Metabolic pathways	http://www.uniprot.org/uniprot/P25851
1161	adenosylhomocysteinase family protein	gi|224060333	3.94±0.25	O23255	SAHH1	GO:0022622,root system development|GO:0009628,response to abiotic stimulus|GO:0080090,regulation of primary metabolic process|GO:0019222,regulation of metabolic process|GO:0048588,developmental cell growth|GO:0051049,regulation of transport|GO:0048468,cell development|GO:0048469,cell maturation|GO:0009167,purine ribonucleoside monophosphate metabolic process|GO:0043933,macromolecular complex subu…	GO:0048046,apoplast|GO:0043229,intracellular organelle|GO:0071944,cell periphery|GO:0043227,membrane-bounded organelle|GO:0043226,organelle|GO:0030054,cell junction|GO:0005737,cytoplasm|GO:0031090,organelle membrane|GO:0005773,vacuole|GO:0098805,whole membrane|GO:0016020,membrane|GO:0005774,vacuolar membrane|GO:0044437,vacuolar part|GO:0005794,Golgi apparatus|GO:0098588,bounding membrane of organ…	GO:0016787,hydrolase activity|GO:0046872,metal ion binding|GO:0046914,transition metal ion binding|GO:0043169,cation binding|GO:0016801,hydrolase activity, acting on ether bonds|GO:0004013,adenosylhomocysteinase activity|GO:0016802,trialkylsulfonium hydrolase activity|GO:0043167,ion binding|GO:0003824,catalytic activity|GO:0005488,binding|GO:0005507,copper ion binding	ath00270,Cysteine and methionine metabolism|ath01100,Metabolic pathways	http://www.uniprot.org/uniprot/O23255
1354	PREDICTED: uncharacterized protein LOC105110752	gi|743920325	0.44±0.11	Q8VXY0	At2g36145	GO:0006739,NADP metabolic process|GO:0009893,positive regulation of metabolic process|GO:0019222,regulation of metabolic process|GO:0006732,coenzyme metabolic process|GO:0005984,disaccharide metabolic process|GO:0009311,oligosaccharide metabolic process|GO:0006807,nitrogen compound metabolic process|GO:0044249,cellular biosynthetic process|GO:0034641,cellular nitrogen compound metabolic process|G…	GO:0055035,plastid thylakoid membrane|GO:0034357,photosynthetic membrane|GO:0031976,plastid thylakoid|GO:0043229,intracellular organelle|GO:0005622,intracellular|GO:0043227,membrane-bounded organelle|GO:0043226,organelle|GO:0009535,chloroplast thylakoid membrane|GO:0009534,chloroplast thylakoid|GO:0031984,organelle subcompartment|GO:0009532,plastid stroma|GO:0009570,chloroplast stroma|GO:0016020,…			http://www.uniprot.org/uniprot/Q8VXY0
1401	PREDICTED: uncharacterized protein LOC105117914	gi|743939144	0.36±0.01	Q8RXS1	PNSB4	GO:0006778,porphyrin-containing compound metabolic process|GO:0006779,porphyrin-containing compound biosynthetic process|GO:0044281,small molecule metabolic process|GO:1901362,organic cyclic compound biosynthetic process|GO:0015979,photosynthesis|GO:0071840,cellular component organization or biogenesis|GO:0044710,single-organism metabolic process|GO:0044711,single-organism biosynthetic process|GO…	GO:0055035,plastid thylakoid membrane|GO:0034357,photosynthetic membrane|GO:0031976,plastid thylakoid|GO:0043229,intracellular organelle|GO:0005622,intracellular|GO:0043227,membrane-bounded organelle|GO:0043226,organelle|GO:0031224,intrinsic component of membrane|GO:0009535,chloroplast thylakoid membrane|GO:0009534,chloroplast thylakoid|GO:0031984,organelle subcompartment|GO:0016021,integral comp…			http://www.uniprot.org/uniprot/Q8RXS1
1534	PREDICTED: NAD(P)H-quinone oxidoreductase subunit N, organellar chromatophore	gi|743928583	0.34±0.14	Q9LVM2	ndhN	GO:0019222,regulation of metabolic process|GO:0009451,RNA modification|GO:0044281,small molecule metabolic process|GO:0015979,photosynthesis|GO:0071840,cellular component organization or biogenesis|GO:0044710,single-organism metabolic process|GO:0044711,single-organism biosynthetic process|GO:0042440,pigment metabolic process|GO:0043207,response to external biotic stimulus|GO:0010257,NADH dehydro…	GO:0055035,plastid thylakoid membrane|GO:0034357,photosynthetic membrane|GO:0031976,plastid thylakoid|GO:0031975,envelope|GO:0043229,intracellular organelle|GO:0009579,thylakoid|GO:0043227,membrane-bounded organelle|GO:0043226,organelle|GO:0009535,chloroplast thylakoid membrane|GO:0009534,chloroplast thylakoid|GO:0031984,organelle subcompartment|GO:0016020,membrane|GO:0044436,thylakoid part|GO:00…	GO:0005488,binding|GO:0003824,catalytic activity|GO:0016655,oxidoreductase activity, acting on NAD(P)H, quinone or similar compound as acceptor|GO:0048037,cofactor binding|GO:0016651,oxidoreductase activity, acting on NAD(P)H|GO:0048038,quinone binding|GO:0016491,oxidoreductase activity		http://www.uniprot.org/uniprot/Q9LVM2
	peroxisome organization
176	PREDICTED: malate dehydrogenase, glyoxysomal	gi|743822923	0.22±0.1	O82399	At2g22780	GO:0034440,lipid oxidation|GO:0009894,regulation of catabolic process|GO:0044238,primary metabolic process|GO:0080090,regulation of primary metabolic process|GO:0031329,regulation of cellular catabolic process|GO:0031326,regulation of cellular biosynthetic process|GO:0031323,regulation of cellular metabolic process|GO:0006631,fatty acid metabolic process|GO:0019752,carboxylic acid metabolic proce…	GO:0005737,cytoplasm|GO:0009536,plastid|GO:0043231,intracellular membrane-bounded organelle|GO:0044464,cell part|GO:0005777,peroxisome|GO:0044444,cytoplasmic part|GO:0005623,cell|GO:0005622,intracellular|GO:0042579,microbody|GO:0043229,intracellular organelle|GO:0044424,intracellular part|GO:0009514,glyoxysome|GO:0043227,membrane-bounded organelle|GO:0043226,organelle|GO:0009507,chloroplast	GO:0016614,oxidoreductase activity, acting on CH-OH group of donors|GO:0016615,malate dehydrogenase activity|GO:0016616,oxidoreductase activity, acting on the CH-OH group of donors, NAD or NADP as acceptor|GO:0003824,catalytic activity|GO:0030060,L-malate dehydrogenase activity|GO:0016491,oxidoreductase activity	ath00630,Glyoxylate and dicarboxylate metabolism|ath00620,Pyruvate metabolism|ath00020,Citrate cycle (TCA cycle)|ath00270,Cysteine and methionine metabolism|ath00710,Carbon fixation in photosynthetic organisms|ath01200,Carbon metabolism|ath01110,Biosynthesis of secondary metabolites|ath01100,Metabolic pathways	http://www.uniprot.org/uniprot/O82399
297	PREDICTED: malate dehydrogenase, glyoxysomal	gi|743795553	0.2±0.05	O82399	At2g22780	GO:0034440,lipid oxidation|GO:0009894,regulation of catabolic process|GO:0044238,primary metabolic process|GO:0080090,regulation of primary metabolic process|GO:0031329,regulation of cellular catabolic process|GO:0031326,regulation of cellular biosynthetic process|GO:0031323,regulation of cellular metabolic process|GO:0006631,fatty acid metabolic process|GO:0019752,carboxylic acid metabolic proce…	GO:0005737,cytoplasm|GO:0009536,plastid|GO:0043231,intracellular membrane-bounded organelle|GO:0044464,cell part|GO:0005777,peroxisome|GO:0044444,cytoplasmic part|GO:0005623,cell|GO:0005622,intracellular|GO:0042579,microbody|GO:0043229,intracellular organelle|GO:0044424,intracellular part|GO:0009514,glyoxysome|GO:0043227,membrane-bounded organelle|GO:0043226,organelle|GO:0009507,chloroplast	GO:0016614,oxidoreductase activity, acting on CH-OH group of donors|GO:0016615,malate dehydrogenase activity|GO:0016616,oxidoreductase activity, acting on the CH-OH group of donors, NAD or NADP as acceptor|GO:0003824,catalytic activity|GO:0030060,L-malate dehydrogenase activity|GO:0016491,oxidoreductase activity	ath00630,Glyoxylate and dicarboxylate metabolism|ath00620,Pyruvate metabolism|ath00020,Citrate cycle (TCA cycle)|ath00270,Cysteine and methionine metabolism|ath00710,Carbon fixation in photosynthetic organisms|ath01200,Carbon metabolism|ath01110,Biosynthesis of secondary metabolites|ath01100,Metabolic pathways	http://www.uniprot.org/uniprot/O82399
703	PREDICTED: vacuolar protein sorting-associated protein 4B-like	gi|743832246	0.31±0.11	Q9ZNT0	SKD1	GO:0034440,lipid oxidation|GO:0008104,protein localization|GO:0048468,cell development|GO:0061025,membrane fusion|GO:0061024,membrane organization|GO:0055075,potassium ion homeostasis|GO:0044281,small molecule metabolic process|GO:0044282,small molecule catabolic process|GO:0098771,inorganic ion homeostasis|GO:0055078,sodium ion homeostasis|GO:0071840,cellular component organization or biogenesis…	GO:0005770,late endosome|GO:0043229,intracellular organelle|GO:0043227,membrane-bounded organelle|GO:0043226,organelle|GO:0030054,cell junction|GO:0010008,endosome membrane|GO:0005737,cytoplasm|GO:0031090,organelle membrane|GO:0005634,nucleus|GO:0016020,membrane|GO:0098805,whole membrane|GO:0031902,late endosome membrane|GO:0098588,bounding membrane of organelle|GO:0055044,symplast|GO:0012505,end…	GO:0035639,purine ribonucleoside triphosphate binding|GO:0005488,binding|GO:0016887,ATPase activity|GO:0043167,ion binding|GO:1901363,heterocyclic compound binding|GO:1901265,nucleoside phosphate binding|GO:0001882,nucleoside binding|GO:0043168,anion binding|GO:0042623,ATPase activity, coupled|GO:0008568,microtubule-severing ATPase activity|GO:0000166,nucleotide binding|GO:0001883,purine nucleosi…	ath04144,Endocytosis	http://www.uniprot.org/uniprot/Q9ZNT0
1028	malate dehydrogenase family protein	gi|224056321	0.5±0.04	O82399	At2g22780	GO:0034440,lipid oxidation|GO:0009894,regulation of catabolic process|GO:0044238,primary metabolic process|GO:0080090,regulation of primary metabolic process|GO:0031329,regulation of cellular catabolic process|GO:0031326,regulation of cellular biosynthetic process|GO:0031323,regulation of cellular metabolic process|GO:0006631,fatty acid metabolic process|GO:0019752,carboxylic acid metabolic proce…	GO:0005737,cytoplasm|GO:0009536,plastid|GO:0043231,intracellular membrane-bounded organelle|GO:0044464,cell part|GO:0005777,peroxisome|GO:0044444,cytoplasmic part|GO:0005623,cell|GO:0005622,intracellular|GO:0042579,microbody|GO:0043229,intracellular organelle|GO:0044424,intracellular part|GO:0009514,glyoxysome|GO:0043227,membrane-bounded organelle|GO:0043226,organelle|GO:0009507,chloroplast	GO:0016614,oxidoreductase activity, acting on CH-OH group of donors|GO:0016615,malate dehydrogenase activity|GO:0016616,oxidoreductase activity, acting on the CH-OH group of donors, NAD or NADP as acceptor|GO:0003824,catalytic activity|GO:0030060,L-malate dehydrogenase activity|GO:0016491,oxidoreductase activity	ath00630,Glyoxylate and dicarboxylate metabolism|ath00620,Pyruvate metabolism|ath00020,Citrate cycle (TCA cycle)|ath00270,Cysteine and methionine metabolism|ath00710,Carbon fixation in photosynthetic organisms|ath01200,Carbon metabolism|ath01110,Biosynthesis of secondary metabolites|ath01100,Metabolic pathways	http://www.uniprot.org/uniprot/O82399
	regulation of hydrogen peroxide metabolic process
41	PREDICTED: oxygen-evolving enhancer protein 1, chloroplastic	gi|743921083	0.12±0.01	Q9S841	PSBO2	GO:0008104,protein localization|GO:0019220,regulation of phosphate metabolic process|GO:0080090,regulation of primary metabolic process|GO:0019222,regulation of metabolic process|GO:0019682,glyceraldehyde-3-phosphate metabolic process|GO:0048585,negative regulation of response to stimulus|GO:0051667,establishment of plastid localization|GO:0048583,regulation of response to stimulus|GO:0031348,neg…	GO:0055035,plastid thylakoid membrane|GO:0034357,photosynthetic membrane|GO:0031976,plastid thylakoid|GO:0031977,thylakoid lumen|GO:0019898,extrinsic component of membrane|GO:0043229,intracellular organelle|GO:0005622,intracellular|GO:0009654,photosystem II oxygen evolving complex|GO:0043226,organelle|GO:0031224,intrinsic component of membrane|GO:0009535,chloroplast thylakoid membrane|GO:0009534,…	GO:0005488,binding|GO:0043169,cation binding|GO:0005515,protein binding|GO:0097159,organic cyclic compound binding|GO:0043167,ion binding|GO:0008266,poly(U) RNA binding|GO:0003727,single-stranded RNA binding|GO:0003723,RNA binding|GO:0003676,nucleic acid binding|GO:0008187,poly-pyrimidine tract binding|GO:0046872,metal ion binding|GO:1901363,heterocyclic compound binding|GO:0005509,calcium ion bi…	ath00195,Photosynthesis|ath01100,Metabolic pathways	http://www.uniprot.org/uniprot/Q9S841
89	PREDICTED: sedoheptulose-1,7-bisphosphatase, chloroplastic	gi|743879686	0.19±0.05	P46283	At3g55800	GO:0009595,detection of biotic stimulus|GO:0006520,cellular amino acid metabolic process|GO:0019220,regulation of phosphate metabolic process|GO:0080090,regulation of primary metabolic process|GO:0019222,regulation of metabolic process|GO:0006470,protein dephosphorylation|GO:0048585,negative regulation of response to stimulus|GO:0048583,regulation of response to stimulus|GO:0031348,negative regul…	GO:0031975,envelope|GO:0048046,apoplast|GO:0043229,intracellular organelle|GO:0043227,membrane-bounded organelle|GO:0043226,organelle|GO:0005737,cytoplasm|GO:0009941,chloroplast envelope|GO:0009536,plastid|GO:0009532,plastid stroma|GO:0009570,chloroplast stroma|GO:0044435,plastid part|GO:0044434,chloroplast part|GO:0009579,thylakoid|GO:0031967,organelle envelope|GO:0009507,chloroplast|GO:0009526,…	GO:0050308,sugar-phosphatase activity|GO:0019203,carbohydrate phosphatase activity|GO:0042132,fructose 1,6-bisphosphate 1-phosphatase activity|GO:0016791,phosphatase activity|GO:0016787,hydrolase activity|GO:0043169,cation binding|GO:0016788,hydrolase activity, acting on ester bonds|GO:0043167,ion binding|GO:0042578,phosphoric ester hydrolase activity|GO:0003824,catalytic activity|GO:0005488,bind…	ath00710,Carbon fixation in photosynthetic organisms|ath01100,Metabolic pathways|ath01200,Carbon metabolism	http://www.uniprot.org/uniprot/P46283
153	PREDICTED: oxygen-evolving enhancer protein 2, chloroplastic-like	gi|743840443	0.12±0.01	Q42029	PSBP1	GO:0009595,detection of biotic stimulus|GO:0008104,protein localization|GO:0019222,regulation of metabolic process|GO:0051049,regulation of transport|GO:0048585,negative regulation of response to stimulus|GO:0048583,regulation of response to stimulus|GO:0031348,negative regulation of defense response|GO:0009696,salicylic acid metabolic process|GO:0009697,salicylic acid biosynthetic process|GO:000…	GO:0031978,plastid thylakoid lumen|GO:0055035,plastid thylakoid membrane|GO:0034357,photosynthetic membrane|GO:0031976,plastid thylakoid|GO:0031977,thylakoid lumen|GO:0019898,extrinsic component of membrane|GO:0048046,apoplast|GO:0043229,intracellular organelle|GO:0009579,thylakoid|GO:0043227,membrane-bounded organelle|GO:0043226,organelle|GO:0009535,chloroplast thylakoid membrane|GO:0009534,chlo…	GO:0005488,binding|GO:0043169,cation binding|GO:0097159,organic cyclic compound binding|GO:0043167,ion binding|GO:0008266,poly(U) RNA binding|GO:0003727,single-stranded RNA binding|GO:0003723,RNA binding|GO:0003676,nucleic acid binding|GO:0008187,poly-pyrimidine tract binding|GO:0046872,metal ion binding|GO:1901363,heterocyclic compound binding|GO:0005509,calcium ion binding	ath00195,Photosynthesis|ath01100,Metabolic pathways	http://www.uniprot.org/uniprot/Q42029
579	O2 evolving complex 33kD family protein	gi|224094610	0.23±0.17	Q9S841	PSBO2	GO:0008104,protein localization|GO:0019220,regulation of phosphate metabolic process|GO:0080090,regulation of primary metabolic process|GO:0019222,regulation of metabolic process|GO:0019682,glyceraldehyde-3-phosphate metabolic process|GO:0048585,negative regulation of response to stimulus|GO:0051667,establishment of plastid localization|GO:0048583,regulation of response to stimulus|GO:0031348,neg…	GO:0055035,plastid thylakoid membrane|GO:0034357,photosynthetic membrane|GO:0031976,plastid thylakoid|GO:0031977,thylakoid lumen|GO:0019898,extrinsic component of membrane|GO:0043229,intracellular organelle|GO:0005622,intracellular|GO:0009654,photosystem II oxygen evolving complex|GO:0043226,organelle|GO:0031224,intrinsic component of membrane|GO:0009535,chloroplast thylakoid membrane|GO:0009534,…	GO:0005488,binding|GO:0043169,cation binding|GO:0005515,protein binding|GO:0097159,organic cyclic compound binding|GO:0043167,ion binding|GO:0008266,poly(U) RNA binding|GO:0003727,single-stranded RNA binding|GO:0003723,RNA binding|GO:0003676,nucleic acid binding|GO:0008187,poly-pyrimidine tract binding|GO:0046872,metal ion binding|GO:1901363,heterocyclic compound binding|GO:0005509,calcium ion bi…	ath00195,Photosynthesis|ath01100,Metabolic pathways	http://www.uniprot.org/uniprot/Q9S841
813	PREDICTED: uncharacterized protein LOC105111212	gi|743796298	2.13±0.11	O24520	AHB1	GO:0009628,response to abiotic stimulus|GO:0019222,regulation of metabolic process|GO:0009627,systemic acquired resistance|GO:0031323,regulation of cellular metabolic process|GO:0071229,cellular response to acid chemical|GO:0023052,signaling|GO:0007165,signal transduction|GO:0070887,cellular response to chemical stimulus|GO:0042221,response to chemical|GO:0001666,response to hypoxia|GO:0050789,re…	GO:0005737,cytoplasm|GO:0005618,cell wall|GO:0005829,cytosol|GO:0016020,membrane|GO:0044464,cell part|GO:0005623,cell|GO:0030312,external encapsulating structure|GO:0055044,symplast|GO:0044444,cytoplasmic part|GO:0071944,cell periphery|GO:0009506,plasmodesma|GO:0005911,cell-cell junction|GO:0005886,plasma membrane|GO:0044424,intracellular part|GO:0005622,intracellular|GO:0030054,cell junction	GO:0043169,cation binding|GO:0005344,oxygen transporter activity|GO:0022892,substrate-specific transporter activity|GO:0046914,transition metal ion binding|GO:0020037,heme binding|GO:0046906,tetrapyrrole binding|GO:0005215,transporter activity|GO:0043167,ion binding|GO:0019825,oxygen binding|GO:0005488,binding|GO:0097159,organic cyclic compound binding|GO:0005506,iron ion binding|GO:0046872,metal…		http://www.uniprot.org/uniprot/O24520
996	PREDICTED: ATP synthase subunit b', chloroplastic-like	gi|743881832	0.4±0.22	Q42139	F10M6.100	GO:0009595,detection of biotic stimulus|GO:0008104,protein localization|GO:0019220,regulation of phosphate metabolic process|GO:0080090,regulation of primary metabolic process|GO:0019222,regulation of metabolic process|GO:0006470,protein dephosphorylation|GO:0048585,negative regulation of response to stimulus|GO:0048583,regulation of response to stimulus|GO:0031348,negative regulation of defense …	GO:0055035,plastid thylakoid membrane|GO:0034357,photosynthetic membrane|GO:0031976,plastid thylakoid|GO:0031975,envelope|GO:0043229,intracellular organelle|GO:0009579,thylakoid|GO:0043227,membrane-bounded organelle|GO:0043226,organelle|GO:0031224,intrinsic component of membrane|GO:0009535,chloroplast thylakoid membrane|GO:0009534,chloroplast thylakoid|GO:0045263,proton-transporting ATP synthase …	GO:0022891,substrate-specific transmembrane transporter activity|GO:0022890,inorganic cation transmembrane transporter activity|GO:0022892,substrate-specific transporter activity|GO:0016787,hydrolase activity|GO:0005215,transporter activity|GO:0008324,cation transmembrane transporter activity|GO:0022857,transmembrane transporter activity|GO:0015075,ion transmembrane transporter activity|GO:000382…	ath00190,Oxidative phosphorylation|ath00195,Photosynthesis|ath01100,Metabolic pathways	http://www.uniprot.org/uniprot/Q42139
1034	hypothetical protein POPTR_0001s14630g	gi|566148978	2.15±1.24	Q9M9E1	ABCG40	GO:0009595,detection of biotic stimulus|GO:0008104,protein localization|GO:0019222,regulation of metabolic process|GO:0048585,negative regulation of response to stimulus|GO:0048583,regulation of response to stimulus|GO:0031348,negative regulation of defense response|GO:0009696,salicylic acid metabolic process|GO:0009697,salicylic acid biosynthetic process|GO:0007165,signal transduction|GO:0044283…	GO:0016021,integral component of membrane|GO:0016020,membrane|GO:0044464,cell part|GO:0005623,cell|GO:0005622,intracellular|GO:0071944,cell periphery|GO:0005886,plasma membrane|GO:0044425,membrane part|GO:0031224,intrinsic component of membrane	GO:0035639,purine ribonucleoside triphosphate binding|GO:0005488,binding|GO:0016887,ATPase activity|GO:0043167,ion binding|GO:1901363,heterocyclic compound binding|GO:1901265,nucleoside phosphate binding|GO:0001882,nucleoside binding|GO:0043168,anion binding|GO:0000166,nucleotide binding|GO:0001883,purine nucleoside binding|GO:0032549,ribonucleoside binding|GO:0017076,purine nucleotide binding|GO…		http://www.uniprot.org/uniprot/Q9M9E1
1047	Mitogen-activated protein kinase 4	gi|224067920	0.47±0.02	Q39024	MPK4	GO:0009595,detection of biotic stimulus|GO:0048467,gynoecium development|GO:0019220,regulation of phosphate metabolic process|GO:0080090,regulation of primary metabolic process|GO:0019222,regulation of metabolic process|GO:0006470,protein dephosphorylation|GO:0048585,negative regulation of response to stimulus|GO:0032260,response to jasmonic acid stimulus involved in jasmonic acid and ethylene-de…	GO:0043229,intracellular organelle|GO:0043228,non-membrane-bounded organelle|GO:0043227,membrane-bounded organelle|GO:0043226,organelle|GO:0005856,cytoskeleton|GO:0005874,microtubule|GO:0005634,nucleus|GO:0044430,cytoskeletal part|GO:0005737,cytoplasm|GO:0015630,microtubule cytoskeleton|GO:0009504,cell plate|GO:0043234,protein complex|GO:0032991,macromolecular complex|GO:0043231,intracellular mem…	GO:0035639,purine ribonucleoside triphosphate binding|GO:0060089,molecular transducer activity|GO:0005488,binding|GO:0004871,signal transducer activity|GO:0043167,ion binding|GO:1901363,heterocyclic compound binding|GO:0001883,purine nucleoside binding|GO:0001882,nucleoside binding|GO:0043168,anion binding|GO:0005057,receptor signaling protein activity|GO:0032549,ribonucleoside binding|GO:0000166…	ath04626,Plant-pathogen interaction|ath04933,AGE-RAGE signaling pathway in diabetic complications	http://www.uniprot.org/uniprot/Q39024
	response to hydrogen peroxide
58	PREDICTED: chaperone protein ClpB1	gi|743926242	0.23±0.01	P42730	CLPB1	GO:0034250,positive regulation of cellular amide metabolic process|GO:0010035,response to inorganic substance|GO:0009628,response to abiotic stimulus|GO:0006457,protein folding|GO:0080090,regulation of primary metabolic process|GO:0019222,regulation of metabolic process|GO:0009891,positive regulation of biosynthetic process|GO:0051246,regulation of protein metabolic process|GO:0031325,positive re…	GO:0031975,envelope|GO:0043229,intracellular organelle|GO:0043227,membrane-bounded organelle|GO:0043226,organelle|GO:0005737,cytoplasm|GO:0009941,chloroplast envelope|GO:0009536,plastid|GO:0009532,plastid stroma|GO:0009570,chloroplast stroma|GO:0005634,nucleus|GO:0044435,plastid part|GO:0044434,chloroplast part|GO:0031967,organelle envelope|GO:0009507,chloroplast|GO:0009526,plastid envelope|GO:00…	GO:0035639,purine ribonucleoside triphosphate binding|GO:0005488,binding|GO:0043167,ion binding|GO:1901363,heterocyclic compound binding|GO:1901265,nucleoside phosphate binding|GO:0001882,nucleoside binding|GO:0043168,anion binding|GO:0000166,nucleotide binding|GO:0001883,purine nucleoside binding|GO:0032549,ribonucleoside binding|GO:0017076,purine nucleotide binding|GO:0005524,ATP binding|GO:003…		http://www.uniprot.org/uniprot/P42730
196	18.2 kDa class I heat shock family protein	gi|566175391	0.09±0.04	P19037	HSP18.1	GO:0006457,protein folding|GO:0009314,response to radiation|GO:0000302,response to reactive oxygen species|GO:0009416,response to light stimulus|GO:0042221,response to chemical|GO:0044267,cellular protein metabolic process|GO:0010035,response to inorganic substance|GO:0044260,cellular macromolecule metabolic process|GO:0009642,response to light intensity|GO:0071704,organic substance metabolic pro…	GO:0005737,cytoplasm|GO:0044464,cell part|GO:0005623,cell|GO:0005622,intracellular|GO:0044424,intracellular part		ath04141,Protein processing in endoplasmic reticulum	http://www.uniprot.org/uniprot/P19037
334	PREDICTED: probable mediator of RNA polymerase II transcription subunit 37c isoform X2	gi|743844327	0.31±0.05	Q9LHA8	MED37C	GO:0009607,response to biotic stimulus|GO:0009628,response to abiotic stimulus|GO:0006457,protein folding|GO:0080090,regulation of primary metabolic process|GO:0019222,regulation of metabolic process|GO:0006950,response to stress|GO:0031326,regulation of cellular biosynthetic process|GO:0009266,response to temperature stimulus|GO:0031323,regulation of cellular metabolic process|GO:0000302,respons…	GO:0048046,apoplast|GO:0043229,intracellular organelle|GO:0071944,cell periphery|GO:0043227,membrane-bounded organelle|GO:0043226,organelle|GO:0005737,cytoplasm|GO:0031090,organelle membrane|GO:0005773,vacuole|GO:0005634,nucleus|GO:0016020,membrane|GO:0005739,mitochondrion|GO:0005774,vacuolar membrane|GO:0044437,vacuolar part|GO:0005794,Golgi apparatus|GO:0098588,bounding membrane of organelle|GO…	GO:0044389,ubiquitin-like protein ligase binding|GO:0035639,purine ribonucleoside triphosphate binding|GO:0019899,enzyme binding|GO:0005488,binding|GO:0043167,ion binding|GO:1901363,heterocyclic compound binding|GO:1901265,nucleoside phosphate binding|GO:0001882,nucleoside binding|GO:0043168,anion binding|GO:0000166,nucleotide binding|GO:0001883,purine nucleoside binding|GO:0032549,ribonucleoside…	ath04144,Endocytosis|ath03040,Spliceosome|ath04141,Protein processing in endoplasmic reticulum	http://www.uniprot.org/uniprot/Q9LHA8
386	hypothetical protein POPTR_0010s06320g	gi|566189392	0.33±0.09	P31170	HSP25.3	GO:0006457,protein folding|GO:0009314,response to radiation|GO:0000302,response to reactive oxygen species|GO:0009416,response to light stimulus|GO:0042221,response to chemical|GO:0044267,cellular protein metabolic process|GO:0010035,response to inorganic substance|GO:0044260,cellular macromolecule metabolic process|GO:0009642,response to light intensity|GO:0071704,organic substance metabolic pro…	GO:0005737,cytoplasm|GO:0009536,plastid|GO:0043231,intracellular membrane-bounded organelle|GO:0044464,cell part|GO:0044444,cytoplasmic part|GO:0005623,cell|GO:0005622,intracellular|GO:0043229,intracellular organelle|GO:0044424,intracellular part|GO:0043227,membrane-bounded organelle|GO:0043226,organelle|GO:0009507,chloroplast		ath04141,Protein processing in endoplasmic reticulum	http://www.uniprot.org/uniprot/P31170
413	hypothetical protein POPTR_0001s29700g	gi|566151722	0.33±0.21	Q9LMU1	EGY3	GO:0006457,protein folding|GO:0009314,response to radiation|GO:0000302,response to reactive oxygen species|GO:0009416,response to light stimulus|GO:0042221,response to chemical|GO:0044267,cellular protein metabolic process|GO:0010035,response to inorganic substance|GO:0044260,cellular macromolecule metabolic process|GO:0009642,response to light intensity|GO:0071704,organic substance metabolic pro…	GO:0031975,envelope|GO:0043229,intracellular organelle|GO:0042170,plastid membrane|GO:0043227,membrane-bounded organelle|GO:0043226,organelle|GO:0031224,intrinsic component of membrane|GO:0005737,cytoplasm|GO:0009941,chloroplast envelope|GO:0009536,plastid|GO:0031090,organelle membrane|GO:0016021,integral component of membrane|GO:0016020,membrane|GO:0044435,plastid part|GO:0044434,chloroplast par…	GO:0016787,hydrolase activity|GO:0003824,catalytic activity|GO:0070011,peptidase activity, acting on L-amino acid peptides|GO:0008233,peptidase activity|GO:0008237,metallopeptidase activity		http://www.uniprot.org/uniprot/Q9LMU1
421	PREDICTED: 17.9 kDa class II heat shock protein-like	gi|743812897	0.13±0.01	P29830	HSP17.6	GO:0006457,protein folding|GO:0009314,response to radiation|GO:0000302,response to reactive oxygen species|GO:0009416,response to light stimulus|GO:0042221,response to chemical|GO:0044267,cellular protein metabolic process|GO:0051716,cellular response to stimulus|GO:0010035,response to inorganic substance|GO:0044260,cellular macromolecule metabolic process|GO:0006979,response to oxidative stress|…	GO:0005737,cytoplasm|GO:0044464,cell part|GO:0005623,cell|GO:0005622,intracellular|GO:0044424,intracellular part		ath04141,Protein processing in endoplasmic reticulum	http://www.uniprot.org/uniprot/P29830
440	heat shock 22K family protein	gi|224120952	0.3±0.02	P31170	HSP25.3	GO:0006457,protein folding|GO:0009314,response to radiation|GO:0000302,response to reactive oxygen species|GO:0009416,response to light stimulus|GO:0042221,response to chemical|GO:0044267,cellular protein metabolic process|GO:0010035,response to inorganic substance|GO:0044260,cellular macromolecule metabolic process|GO:0009642,response to light intensity|GO:0071704,organic substance metabolic pro…	GO:0005737,cytoplasm|GO:0009536,plastid|GO:0043231,intracellular membrane-bounded organelle|GO:0044464,cell part|GO:0044444,cytoplasmic part|GO:0005623,cell|GO:0005622,intracellular|GO:0043229,intracellular organelle|GO:0044424,intracellular part|GO:0043227,membrane-bounded organelle|GO:0043226,organelle|GO:0009507,chloroplast		ath04141,Protein processing in endoplasmic reticulum	http://www.uniprot.org/uniprot/P31170
483	17.6 kDa class I small heat shock family protein	gi|566167461	0.35±0.11	Q9ZW31	HSP17.6B	GO:0006457,protein folding|GO:0009314,response to radiation|GO:0000302,response to reactive oxygen species|GO:0009416,response to light stimulus|GO:0042221,response to chemical|GO:0044267,cellular protein metabolic process|GO:0051716,cellular response to stimulus|GO:0010035,response to inorganic substance|GO:0044260,cellular macromolecule metabolic process|GO:0006979,response to oxidative stress|…	GO:0005737,cytoplasm|GO:0044464,cell part|GO:0005623,cell|GO:0005622,intracellular|GO:0044424,intracellular part		ath04141,Protein processing in endoplasmic reticulum	http://www.uniprot.org/uniprot/Q9ZW31
499	PREDICTED: heat shock 70 kDa protein isoform X2	gi|743874087	0.33±0.04	Q9LHA8	MED37C	GO:0009607,response to biotic stimulus|GO:0009628,response to abiotic stimulus|GO:0006457,protein folding|GO:0080090,regulation of primary metabolic process|GO:0019222,regulation of metabolic process|GO:0006950,response to stress|GO:0031326,regulation of cellular biosynthetic process|GO:0009266,response to temperature stimulus|GO:0031323,regulation of cellular metabolic process|GO:0000302,respons…	GO:0048046,apoplast|GO:0043229,intracellular organelle|GO:0071944,cell periphery|GO:0043227,membrane-bounded organelle|GO:0043226,organelle|GO:0005737,cytoplasm|GO:0031090,organelle membrane|GO:0005773,vacuole|GO:0005634,nucleus|GO:0016020,membrane|GO:0005739,mitochondrion|GO:0005774,vacuolar membrane|GO:0044437,vacuolar part|GO:0005794,Golgi apparatus|GO:0098588,bounding membrane of organelle|GO…	GO:0044389,ubiquitin-like protein ligase binding|GO:0035639,purine ribonucleoside triphosphate binding|GO:0019899,enzyme binding|GO:0005488,binding|GO:0043167,ion binding|GO:1901363,heterocyclic compound binding|GO:1901265,nucleoside phosphate binding|GO:0001882,nucleoside binding|GO:0043168,anion binding|GO:0000166,nucleotide binding|GO:0001883,purine nucleoside binding|GO:0032549,ribonucleoside…	ath04144,Endocytosis|ath03040,Spliceosome|ath04141,Protein processing in endoplasmic reticulum	http://www.uniprot.org/uniprot/Q9LHA8
817	hypothetical protein POPTR_0015s06770g	gi|566206271	0.29±0.05	P42730	CLPB1	GO:0034250,positive regulation of cellular amide metabolic process|GO:0010035,response to inorganic substance|GO:0009628,response to abiotic stimulus|GO:0006457,protein folding|GO:0080090,regulation of primary metabolic process|GO:0019222,regulation of metabolic process|GO:0009891,positive regulation of biosynthetic process|GO:0051246,regulation of protein metabolic process|GO:0031325,positive re…	GO:0031975,envelope|GO:0043229,intracellular organelle|GO:0043227,membrane-bounded organelle|GO:0043226,organelle|GO:0005737,cytoplasm|GO:0009941,chloroplast envelope|GO:0009536,plastid|GO:0009532,plastid stroma|GO:0009570,chloroplast stroma|GO:0005634,nucleus|GO:0044435,plastid part|GO:0044434,chloroplast part|GO:0031967,organelle envelope|GO:0009507,chloroplast|GO:0009526,plastid envelope|GO:00…	GO:0035639,purine ribonucleoside triphosphate binding|GO:0005488,binding|GO:0043167,ion binding|GO:1901363,heterocyclic compound binding|GO:1901265,nucleoside phosphate binding|GO:0001882,nucleoside binding|GO:0043168,anion binding|GO:0000166,nucleotide binding|GO:0001883,purine nucleoside binding|GO:0032549,ribonucleoside binding|GO:0017076,purine nucleotide binding|GO:0005524,ATP binding|GO:003…		http://www.uniprot.org/uniprot/P42730
1499	hypothetical protein POPTR_0009s03520g, partial	gi|566186111	0.13±0.05	P13853	HSP17.6C	GO:0006457,protein folding|GO:0009314,response to radiation|GO:0000302,response to reactive oxygen species|GO:0009416,response to light stimulus|GO:0042221,response to chemical|GO:0044267,cellular protein metabolic process|GO:0051716,cellular response to stimulus|GO:0010035,response to inorganic substance|GO:0044260,cellular macromolecule metabolic process|GO:0006979,response to oxidative stress|…	GO:0005737,cytoplasm|GO:0044464,cell part|GO:0005623,cell|GO:0005622,intracellular|GO:0044424,intracellular part		ath04141,Protein processing in endoplasmic reticulum	http://www.uniprot.org/uniprot/P13853
	response to hydroperoxide
449	PREDICTED: probable pyridoxal biosynthesis protein PDX1	gi|743811825	0.43±0.05	Q8L940	PDX13	GO:0019222,regulation of metabolic process|GO:0010335,response to non-ionic osmotic stress|GO:0006778,porphyrin-containing compound metabolic process|GO:0044281,small molecule metabolic process|GO:0044283,small molecule biosynthetic process|GO:1901362,organic cyclic compound biosynthetic process|GO:1901360,organic cyclic compound metabolic process|GO:0044710,single-organism metabolic process|GO:0…	GO:0005737,cytoplasm|GO:0005829,cytosol|GO:0016020,membrane|GO:0044464,cell part|GO:0005623,cell|GO:0005622,intracellular|GO:0044444,cytoplasmic part|GO:0071944,cell periphery|GO:0012505,endomembrane system|GO:0005886,plasma membrane|GO:0044424,intracellular part	GO:0036381,pyridoxal 5'-phosphate synthase (glutamine hydrolysing) activity|GO:0016840,carbon-nitrogen lyase activity|GO:0016843,amine-lyase activity|GO:0016829,lyase activity|GO:0003824,catalytic activity|GO:0005488,binding|GO:0005515,protein binding|GO:0046983,protein dimerization activity|GO:0046982,protein heterodimerization activity|GO:0042802,identical protein binding|GO:0042803,protein hom…	ath00750,Vitamin B6 metabolism	http://www.uniprot.org/uniprot/Q8L940
	response to lipid hydroperoxide
449	PREDICTED: probable pyridoxal biosynthesis protein PDX1	gi|743811825	0.43±0.05	Q8L940	PDX13	GO:0019222,regulation of metabolic process|GO:0010335,response to non-ionic osmotic stress|GO:0006778,porphyrin-containing compound metabolic process|GO:0044281,small molecule metabolic process|GO:0044283,small molecule biosynthetic process|GO:1901362,organic cyclic compound biosynthetic process|GO:1901360,organic cyclic compound metabolic process|GO:0044710,single-organism metabolic process|GO:0…	GO:0005737,cytoplasm|GO:0005829,cytosol|GO:0016020,membrane|GO:0044464,cell part|GO:0005623,cell|GO:0005622,intracellular|GO:0044444,cytoplasmic part|GO:0071944,cell periphery|GO:0012505,endomembrane system|GO:0005886,plasma membrane|GO:0044424,intracellular part	GO:0036381,pyridoxal 5'-phosphate synthase (glutamine hydrolysing) activity|GO:0016840,carbon-nitrogen lyase activity|GO:0016843,amine-lyase activity|GO:0016829,lyase activity|GO:0003824,catalytic activity|GO:0005488,binding|GO:0005515,protein binding|GO:0046983,protein dimerization activity|GO:0046982,protein heterodimerization activity|GO:0042802,identical protein binding|GO:0042803,protein hom…	ath00750,Vitamin B6 metabolism	http://www.uniprot.org/uniprot/Q8L940
	response to oxidative stress
58	PREDICTED: chaperone protein ClpB1	gi|743926242	0.23±0.01	P42730	CLPB1	GO:0034250,positive regulation of cellular amide metabolic process|GO:0010035,response to inorganic substance|GO:0009628,response to abiotic stimulus|GO:0006457,protein folding|GO:0080090,regulation of primary metabolic process|GO:0019222,regulation of metabolic process|GO:0009891,positive regulation of biosynthetic process|GO:0051246,regulation of protein metabolic process|GO:0031325,positive re…	GO:0031975,envelope|GO:0043229,intracellular organelle|GO:0043227,membrane-bounded organelle|GO:0043226,organelle|GO:0005737,cytoplasm|GO:0009941,chloroplast envelope|GO:0009536,plastid|GO:0009532,plastid stroma|GO:0009570,chloroplast stroma|GO:0005634,nucleus|GO:0044435,plastid part|GO:0044434,chloroplast part|GO:0031967,organelle envelope|GO:0009507,chloroplast|GO:0009526,plastid envelope|GO:00…	GO:0035639,purine ribonucleoside triphosphate binding|GO:0005488,binding|GO:0043167,ion binding|GO:1901363,heterocyclic compound binding|GO:1901265,nucleoside phosphate binding|GO:0001882,nucleoside binding|GO:0043168,anion binding|GO:0000166,nucleotide binding|GO:0001883,purine nucleoside binding|GO:0032549,ribonucleoside binding|GO:0017076,purine nucleotide binding|GO:0005524,ATP binding|GO:003…		http://www.uniprot.org/uniprot/P42730
95	PREDICTED: catalase isozyme 1	gi|743895899	0.38±0.06	P25819	CAT2	GO:0019725,cellular homeostasis|GO:0009991,response to extracellular stimulus|GO:0009628,response to abiotic stimulus|GO:0008152,metabolic process|GO:0009314,response to radiation|GO:0009648,photoperiodism|GO:0031667,response to nutrient levels|GO:0042592,homeostatic process|GO:0042744,hydrogen peroxide catabolic process|GO:0042743,hydrogen peroxide metabolic process|GO:0042594,response to starva…	GO:0022626,cytosolic ribosome|GO:0031975,envelope|GO:0042579,microbody|GO:0043229,intracellular organelle|GO:0043228,non-membrane-bounded organelle|GO:0009514,glyoxysome|GO:0043227,membrane-bounded organelle|GO:0043226,organelle|GO:0005737,cytoplasm|GO:0009536,plastid|GO:0010319,stromule|GO:0005777,peroxisome|GO:0005739,mitochondrion|GO:0030529,ribonucleoprotein complex|GO:0044435,plastid part|GO…	GO:0043169,cation binding|GO:0043167,ion binding|GO:0046872,metal ion binding|GO:0046914,transition metal ion binding|GO:0020037,heme binding|GO:0046906,tetrapyrrole binding|GO:0097159,organic cyclic compound binding|GO:0016209,antioxidant activity|GO:0050897,cobalt ion binding|GO:1901363,heterocyclic compound binding|GO:0003824,catalytic activity|GO:0005488,binding|GO:0005515,protein binding|GO:…	ath00630,Glyoxylate and dicarboxylate metabolism|ath04146,Peroxisome|ath01110,Biosynthesis of secondary metabolites|ath00380,Tryptophan metabolism|ath01200,Carbon metabolism	http://www.uniprot.org/uniprot/P25819
196	18.2 kDa class I heat shock family protein	gi|566175391	0.09±0.04	P19037	HSP18.1	GO:0006457,protein folding|GO:0009314,response to radiation|GO:0000302,response to reactive oxygen species|GO:0009416,response to light stimulus|GO:0042221,response to chemical|GO:0044267,cellular protein metabolic process|GO:0010035,response to inorganic substance|GO:0044260,cellular macromolecule metabolic process|GO:0009642,response to light intensity|GO:0071704,organic substance metabolic pro…	GO:0005737,cytoplasm|GO:0044464,cell part|GO:0005623,cell|GO:0005622,intracellular|GO:0044424,intracellular part		ath04141,Protein processing in endoplasmic reticulum	http://www.uniprot.org/uniprot/P19037
205	PREDICTED: probable fructose-bisphosphate aldolase 3, chloroplastic	gi|743889355	3.25±1.48	Q9ZU52	FBA3	GO:0009167,purine ribonucleoside monophosphate metabolic process|GO:0044281,small molecule metabolic process|GO:0009161,ribonucleoside monophosphate metabolic process|GO:1901360,organic cyclic compound metabolic process|GO:0044712,single-organism catabolic process|GO:0044710,single-organism metabolic process|GO:0010035,response to inorganic substance|GO:0009199,ribonucleoside triphosphate metabol…	GO:0031976,plastid thylakoid|GO:0043229,intracellular organelle|GO:0043227,membrane-bounded organelle|GO:0043226,organelle|GO:0009579,thylakoid|GO:0009534,chloroplast thylakoid|GO:0031984,organelle subcompartment|GO:0009532,plastid stroma|GO:0009570,chloroplast stroma|GO:0005739,mitochondrion|GO:0044435,plastid part|GO:0044434,chloroplast part|GO:0005737,cytoplasm|GO:0010287,plastoglobule|GO:0009…	GO:0016829,lyase activity|GO:0016830,carbon-carbon lyase activity|GO:0016832,aldehyde-lyase activity|GO:0003824,catalytic activity|GO:0004332,fructose-bisphosphate aldolase activity	ath00030,Pentose phosphate pathway|ath00710,Carbon fixation in photosynthetic organisms|ath00010,Glycolysis / Gluconeogenesis|ath00051,Fructose and mannose metabolism|ath01230,Biosynthesis of amino acids|ath01200,Carbon metabolism|ath01110,Biosynthesis of secondary metabolites|ath01100,Metabolic pathways	http://www.uniprot.org/uniprot/Q9ZU52
292	Superoxide dismutase family protein	gi|566168071	0.1±0.02	O78310	CSD2	GO:0019222,regulation of metabolic process|GO:0044712,single-organism catabolic process|GO:0044710,single-organism metabolic process|GO:0010605,negative regulation of macromolecule metabolic process|GO:0010608,posttranscriptional regulation of gene expression|GO:0040029,regulation of gene expression, epigenetic|GO:0009642,response to light intensity|GO:0016458,gene silencing|GO:0048519,negative r…	GO:0048046,apoplast|GO:0043229,intracellular organelle|GO:0043227,membrane-bounded organelle|GO:0043226,organelle|GO:0009579,thylakoid|GO:0044446,intracellular organelle part|GO:0009536,plastid|GO:0009532,plastid stroma|GO:0009570,chloroplast stroma|GO:0044435,plastid part|GO:0044434,chloroplast part|GO:0005737,cytoplasm|GO:0009507,chloroplast|GO:0043231,intracellular membrane-bounded organelle|G…	GO:0005488,binding|GO:0016721,oxidoreductase activity, acting on superoxide radicals as acceptor|GO:0046872,metal ion binding|GO:0046914,transition metal ion binding|GO:0043169,cation binding|GO:0016209,antioxidant activity|GO:0043167,ion binding|GO:0003824,catalytic activity|GO:0008270,zinc ion binding|GO:0004784,superoxide dismutase activity|GO:0005507,copper ion binding|GO:0016491,oxidoreducta…	ath04146,Peroxisome	http://www.uniprot.org/uniprot/O78310
334	PREDICTED: probable mediator of RNA polymerase II transcription subunit 37c isoform X2	gi|743844327	0.31±0.05	Q9LHA8	MED37C	GO:0009607,response to biotic stimulus|GO:0009628,response to abiotic stimulus|GO:0006457,protein folding|GO:0080090,regulation of primary metabolic process|GO:0019222,regulation of metabolic process|GO:0006950,response to stress|GO:0031326,regulation of cellular biosynthetic process|GO:0009266,response to temperature stimulus|GO:0031323,regulation of cellular metabolic process|GO:0000302,respons…	GO:0048046,apoplast|GO:0043229,intracellular organelle|GO:0071944,cell periphery|GO:0043227,membrane-bounded organelle|GO:0043226,organelle|GO:0005737,cytoplasm|GO:0031090,organelle membrane|GO:0005773,vacuole|GO:0005634,nucleus|GO:0016020,membrane|GO:0005739,mitochondrion|GO:0005774,vacuolar membrane|GO:0044437,vacuolar part|GO:0005794,Golgi apparatus|GO:0098588,bounding membrane of organelle|GO…	GO:0044389,ubiquitin-like protein ligase binding|GO:0035639,purine ribonucleoside triphosphate binding|GO:0019899,enzyme binding|GO:0005488,binding|GO:0043167,ion binding|GO:1901363,heterocyclic compound binding|GO:1901265,nucleoside phosphate binding|GO:0001882,nucleoside binding|GO:0043168,anion binding|GO:0000166,nucleotide binding|GO:0001883,purine nucleoside binding|GO:0032549,ribonucleoside…	ath04144,Endocytosis|ath03040,Spliceosome|ath04141,Protein processing in endoplasmic reticulum	http://www.uniprot.org/uniprot/Q9LHA8
386	hypothetical protein POPTR_0010s06320g	gi|566189392	0.33±0.09	P31170	HSP25.3	GO:0006457,protein folding|GO:0009314,response to radiation|GO:0000302,response to reactive oxygen species|GO:0009416,response to light stimulus|GO:0042221,response to chemical|GO:0044267,cellular protein metabolic process|GO:0010035,response to inorganic substance|GO:0044260,cellular macromolecule metabolic process|GO:0009642,response to light intensity|GO:0071704,organic substance metabolic pro…	GO:0005737,cytoplasm|GO:0009536,plastid|GO:0043231,intracellular membrane-bounded organelle|GO:0044464,cell part|GO:0044444,cytoplasmic part|GO:0005623,cell|GO:0005622,intracellular|GO:0043229,intracellular organelle|GO:0044424,intracellular part|GO:0043227,membrane-bounded organelle|GO:0043226,organelle|GO:0009507,chloroplast		ath04141,Protein processing in endoplasmic reticulum	http://www.uniprot.org/uniprot/P31170
413	hypothetical protein POPTR_0001s29700g	gi|566151722	0.33±0.21	Q9LMU1	EGY3	GO:0006457,protein folding|GO:0009314,response to radiation|GO:0000302,response to reactive oxygen species|GO:0009416,response to light stimulus|GO:0042221,response to chemical|GO:0044267,cellular protein metabolic process|GO:0010035,response to inorganic substance|GO:0044260,cellular macromolecule metabolic process|GO:0009642,response to light intensity|GO:0071704,organic substance metabolic pro…	GO:0031975,envelope|GO:0043229,intracellular organelle|GO:0042170,plastid membrane|GO:0043227,membrane-bounded organelle|GO:0043226,organelle|GO:0031224,intrinsic component of membrane|GO:0005737,cytoplasm|GO:0009941,chloroplast envelope|GO:0009536,plastid|GO:0031090,organelle membrane|GO:0016021,integral component of membrane|GO:0016020,membrane|GO:0044435,plastid part|GO:0044434,chloroplast par…	GO:0016787,hydrolase activity|GO:0003824,catalytic activity|GO:0070011,peptidase activity, acting on L-amino acid peptides|GO:0008233,peptidase activity|GO:0008237,metallopeptidase activity		http://www.uniprot.org/uniprot/Q9LMU1
421	PREDICTED: 17.9 kDa class II heat shock protein-like	gi|743812897	0.13±0.01	P29830	HSP17.6	GO:0006457,protein folding|GO:0009314,response to radiation|GO:0000302,response to reactive oxygen species|GO:0009416,response to light stimulus|GO:0042221,response to chemical|GO:0044267,cellular protein metabolic process|GO:0051716,cellular response to stimulus|GO:0010035,response to inorganic substance|GO:0044260,cellular macromolecule metabolic process|GO:0006979,response to oxidative stress|…	GO:0005737,cytoplasm|GO:0044464,cell part|GO:0005623,cell|GO:0005622,intracellular|GO:0044424,intracellular part		ath04141,Protein processing in endoplasmic reticulum	http://www.uniprot.org/uniprot/P29830
440	heat shock 22K family protein	gi|224120952	0.3±0.02	P31170	HSP25.3	GO:0006457,protein folding|GO:0009314,response to radiation|GO:0000302,response to reactive oxygen species|GO:0009416,response to light stimulus|GO:0042221,response to chemical|GO:0044267,cellular protein metabolic process|GO:0010035,response to inorganic substance|GO:0044260,cellular macromolecule metabolic process|GO:0009642,response to light intensity|GO:0071704,organic substance metabolic pro…	GO:0005737,cytoplasm|GO:0009536,plastid|GO:0043231,intracellular membrane-bounded organelle|GO:0044464,cell part|GO:0044444,cytoplasmic part|GO:0005623,cell|GO:0005622,intracellular|GO:0043229,intracellular organelle|GO:0044424,intracellular part|GO:0043227,membrane-bounded organelle|GO:0043226,organelle|GO:0009507,chloroplast		ath04141,Protein processing in endoplasmic reticulum	http://www.uniprot.org/uniprot/P31170
449	PREDICTED: probable pyridoxal biosynthesis protein PDX1	gi|743811825	0.43±0.05	Q8L940	PDX13	GO:0019222,regulation of metabolic process|GO:0010335,response to non-ionic osmotic stress|GO:0006778,porphyrin-containing compound metabolic process|GO:0044281,small molecule metabolic process|GO:0044283,small molecule biosynthetic process|GO:1901362,organic cyclic compound biosynthetic process|GO:1901360,organic cyclic compound metabolic process|GO:0044710,single-organism metabolic process|GO:0…	GO:0005737,cytoplasm|GO:0005829,cytosol|GO:0016020,membrane|GO:0044464,cell part|GO:0005623,cell|GO:0005622,intracellular|GO:0044444,cytoplasmic part|GO:0071944,cell periphery|GO:0012505,endomembrane system|GO:0005886,plasma membrane|GO:0044424,intracellular part	GO:0036381,pyridoxal 5'-phosphate synthase (glutamine hydrolysing) activity|GO:0016840,carbon-nitrogen lyase activity|GO:0016843,amine-lyase activity|GO:0016829,lyase activity|GO:0003824,catalytic activity|GO:0005488,binding|GO:0005515,protein binding|GO:0046983,protein dimerization activity|GO:0046982,protein heterodimerization activity|GO:0042802,identical protein binding|GO:0042803,protein hom…	ath00750,Vitamin B6 metabolism	http://www.uniprot.org/uniprot/Q8L940
450	PREDICTED: peroxidase 12-like	gi|743899195	4.27±0.28	Q96520	PER12	GO:0048638,regulation of developmental growth|GO:0048466,androecium development|GO:0008152,metabolic process|GO:0048589,developmental growth|GO:0048443,stamen development|GO:0048569,post-embryonic organ development|GO:0009791,post-embryonic development|GO:0042744,hydrogen peroxide catabolic process|GO:0035266,meristem growth|GO:0050789,regulation of biological process|GO:0044699,single-organism p…	GO:0043229,intracellular organelle|GO:0071944,cell periphery|GO:0043227,membrane-bounded organelle|GO:0043226,organelle|GO:0030054,cell junction|GO:0005737,cytoplasm|GO:0005773,vacuole|GO:0016020,membrane|GO:0030312,external encapsulating structure|GO:0055044,symplast|GO:0005911,cell-cell junction|GO:0009505,plant-type cell wall|GO:0009506,plasmodesma|GO:0043231,intracellular membrane-bounded org…	GO:0043169,cation binding|GO:0046872,metal ion binding|GO:0020037,heme binding|GO:0046906,tetrapyrrole binding|GO:0097159,organic cyclic compound binding|GO:0016209,antioxidant activity|GO:0043167,ion binding|GO:1901363,heterocyclic compound binding|GO:0003824,catalytic activity|GO:0005488,binding|GO:0016684,oxidoreductase activity, acting on peroxide as acceptor|GO:0004601,peroxidase activity|GO…	ath00940,Phenylpropanoid biosynthesis|ath01100,Metabolic pathways|ath01110,Biosynthesis of secondary metabolites	http://www.uniprot.org/uniprot/Q96520
483	17.6 kDa class I small heat shock family protein	gi|566167461	0.35±0.11	Q9ZW31	HSP17.6B	GO:0006457,protein folding|GO:0009314,response to radiation|GO:0000302,response to reactive oxygen species|GO:0009416,response to light stimulus|GO:0042221,response to chemical|GO:0044267,cellular protein metabolic process|GO:0051716,cellular response to stimulus|GO:0010035,response to inorganic substance|GO:0044260,cellular macromolecule metabolic process|GO:0006979,response to oxidative stress|…	GO:0005737,cytoplasm|GO:0044464,cell part|GO:0005623,cell|GO:0005622,intracellular|GO:0044424,intracellular part		ath04141,Protein processing in endoplasmic reticulum	http://www.uniprot.org/uniprot/Q9ZW31
493	PREDICTED: uncharacterized protein LOC105113849	gi|743928577	0.46±0.1	Q9FX85	PER10	GO:0044712,single-organism catabolic process|GO:0044710,single-organism metabolic process|GO:0044237,cellular metabolic process|GO:0050896,response to stimulus|GO:0009987,cellular process|GO:0072593,reactive oxygen species metabolic process|GO:0044248,cellular catabolic process|GO:0006950,response to stress|GO:0042744,hydrogen peroxide catabolic process|GO:0044763,single-organism cellular process…	GO:0005576,extracellular region	GO:0043169,cation binding|GO:0046872,metal ion binding|GO:0020037,heme binding|GO:0046906,tetrapyrrole binding|GO:0097159,organic cyclic compound binding|GO:0016209,antioxidant activity|GO:0043167,ion binding|GO:1901363,heterocyclic compound binding|GO:0003824,catalytic activity|GO:0005488,binding|GO:0016684,oxidoreductase activity, acting on peroxide as acceptor|GO:0004601,peroxidase activity|GO…	ath00940,Phenylpropanoid biosynthesis|ath01100,Metabolic pathways|ath01110,Biosynthesis of secondary metabolites	http://www.uniprot.org/uniprot/Q9FX85
499	PREDICTED: heat shock 70 kDa protein isoform X2	gi|743874087	0.33±0.04	Q9LHA8	MED37C	GO:0009607,response to biotic stimulus|GO:0009628,response to abiotic stimulus|GO:0006457,protein folding|GO:0080090,regulation of primary metabolic process|GO:0019222,regulation of metabolic process|GO:0006950,response to stress|GO:0031326,regulation of cellular biosynthetic process|GO:0009266,response to temperature stimulus|GO:0031323,regulation of cellular metabolic process|GO:0000302,respons…	GO:0048046,apoplast|GO:0043229,intracellular organelle|GO:0071944,cell periphery|GO:0043227,membrane-bounded organelle|GO:0043226,organelle|GO:0005737,cytoplasm|GO:0031090,organelle membrane|GO:0005773,vacuole|GO:0005634,nucleus|GO:0016020,membrane|GO:0005739,mitochondrion|GO:0005774,vacuolar membrane|GO:0044437,vacuolar part|GO:0005794,Golgi apparatus|GO:0098588,bounding membrane of organelle|GO…	GO:0044389,ubiquitin-like protein ligase binding|GO:0035639,purine ribonucleoside triphosphate binding|GO:0019899,enzyme binding|GO:0005488,binding|GO:0043167,ion binding|GO:1901363,heterocyclic compound binding|GO:1901265,nucleoside phosphate binding|GO:0001882,nucleoside binding|GO:0043168,anion binding|GO:0000166,nucleotide binding|GO:0001883,purine nucleoside binding|GO:0032549,ribonucleoside…	ath04144,Endocytosis|ath03040,Spliceosome|ath04141,Protein processing in endoplasmic reticulum	http://www.uniprot.org/uniprot/Q9LHA8
515	PREDICTED: ferritin-3, chloroplastic-like	gi|743879261	4.83±0.7	Q9SRL5	FER2	GO:0008152,metabolic process|GO:0050801,ion homeostasis|GO:0010039,response to iron ion|GO:0000302,response to reactive oxygen species|GO:0042592,homeostatic process|GO:0055072,iron ion homeostasis|GO:0006826,iron ion transport|GO:0055076,transition metal ion homeostasis|GO:0098771,inorganic ion homeostasis|GO:0015979,photosynthesis|GO:0044699,single-organism process|GO:0009719,response to endoge…	GO:0005737,cytoplasm|GO:0009536,plastid|GO:0043231,intracellular membrane-bounded organelle|GO:0044464,cell part|GO:0044444,cytoplasmic part|GO:0005623,cell|GO:0005622,intracellular|GO:0043229,intracellular organelle|GO:0044424,intracellular part|GO:0043227,membrane-bounded organelle|GO:0043226,organelle|GO:0009507,chloroplast	GO:0043169,cation binding|GO:0016722,oxidoreductase activity, oxidizing metal ions|GO:0016724,oxidoreductase activity, oxidizing metal ions, oxygen as acceptor|GO:0046914,transition metal ion binding|GO:0003824,catalytic activity|GO:0004322,ferroxidase activity|GO:0043167,ion binding|GO:0008199,ferric iron binding|GO:0005488,binding|GO:0005506,iron ion binding|GO:0046872,metal ion binding|GO:0016…		http://www.uniprot.org/uniprot/Q9SRL5
817	hypothetical protein POPTR_0015s06770g	gi|566206271	0.29±0.05	P42730	CLPB1	GO:0034250,positive regulation of cellular amide metabolic process|GO:0010035,response to inorganic substance|GO:0009628,response to abiotic stimulus|GO:0006457,protein folding|GO:0080090,regulation of primary metabolic process|GO:0019222,regulation of metabolic process|GO:0009891,positive regulation of biosynthetic process|GO:0051246,regulation of protein metabolic process|GO:0031325,positive re…	GO:0031975,envelope|GO:0043229,intracellular organelle|GO:0043227,membrane-bounded organelle|GO:0043226,organelle|GO:0005737,cytoplasm|GO:0009941,chloroplast envelope|GO:0009536,plastid|GO:0009532,plastid stroma|GO:0009570,chloroplast stroma|GO:0005634,nucleus|GO:0044435,plastid part|GO:0044434,chloroplast part|GO:0031967,organelle envelope|GO:0009507,chloroplast|GO:0009526,plastid envelope|GO:00…	GO:0035639,purine ribonucleoside triphosphate binding|GO:0005488,binding|GO:0043167,ion binding|GO:1901363,heterocyclic compound binding|GO:1901265,nucleoside phosphate binding|GO:0001882,nucleoside binding|GO:0043168,anion binding|GO:0000166,nucleotide binding|GO:0001883,purine nucleoside binding|GO:0032549,ribonucleoside binding|GO:0017076,purine nucleotide binding|GO:0005524,ATP binding|GO:003…		http://www.uniprot.org/uniprot/P42730
972	hypothetical protein POPTR_0006s05130g	gi|566174566	4.76±2.07	Q94A08	RFS2	GO:0009311,oligosaccharide metabolic process|GO:0009313,oligosaccharide catabolic process|GO:0034484,raffinose catabolic process|GO:0044699,single-organism process|GO:0044712,single-organism catabolic process|GO:0044710,single-organism metabolic process|GO:0071704,organic substance metabolic process|GO:0080167,response to karrikin|GO:0044238,primary metabolic process|GO:1901575,organic substance …	GO:0055044,symplast|GO:0030054,cell junction|GO:0005911,cell-cell junction|GO:0009506,plasmodesma	GO:0047274,galactinol-sucrose galactosyltransferase activity|GO:0016787,hydrolase activity|GO:0052692,raffinose alpha-galactosidase activity|GO:0015925,galactosidase activity|GO:0016798,hydrolase activity, acting on glycosyl bonds|GO:0003824,catalytic activity|GO:0016740,transferase activity|GO:0004557,alpha-galactosidase activity|GO:0008378,galactosyltransferase activity|GO:0016757,transferase a…	ath00052,Galactose metabolism	http://www.uniprot.org/uniprot/Q94A08
1034	hypothetical protein POPTR_0001s14630g	gi|566148978	2.15±1.24	Q9M9E1	ABCG40	GO:0009595,detection of biotic stimulus|GO:0008104,protein localization|GO:0019222,regulation of metabolic process|GO:0048585,negative regulation of response to stimulus|GO:0048583,regulation of response to stimulus|GO:0031348,negative regulation of defense response|GO:0009696,salicylic acid metabolic process|GO:0009697,salicylic acid biosynthetic process|GO:0007165,signal transduction|GO:0044283…	GO:0016021,integral component of membrane|GO:0016020,membrane|GO:0044464,cell part|GO:0005623,cell|GO:0005622,intracellular|GO:0071944,cell periphery|GO:0005886,plasma membrane|GO:0044425,membrane part|GO:0031224,intrinsic component of membrane	GO:0035639,purine ribonucleoside triphosphate binding|GO:0005488,binding|GO:0016887,ATPase activity|GO:0043167,ion binding|GO:1901363,heterocyclic compound binding|GO:1901265,nucleoside phosphate binding|GO:0001882,nucleoside binding|GO:0043168,anion binding|GO:0000166,nucleotide binding|GO:0001883,purine nucleoside binding|GO:0032549,ribonucleoside binding|GO:0017076,purine nucleotide binding|GO…		http://www.uniprot.org/uniprot/Q9M9E1
1055	hypothetical protein POPTR_0006s14520g	gi|566176419	3.06±0.49	Q9FUP0	OPR3	GO:0009738,abscisic acid-activated signaling pathway|GO:0050794,regulation of cellular process|GO:0009694,jasmonic acid metabolic process|GO:0009695,jasmonic acid biosynthetic process|GO:0007165,signal transduction|GO:0044282,small molecule catabolic process|GO:0044283,small molecule biosynthetic process|GO:1901362,organic cyclic compound biosynthetic process|GO:1901360,organic cyclic compound me…	GO:0005737,cytoplasm|GO:0043231,intracellular membrane-bounded organelle|GO:0044464,cell part|GO:0005777,peroxisome|GO:0044444,cytoplasmic part|GO:0005623,cell|GO:0005622,intracellular|GO:0042579,microbody|GO:0043229,intracellular organelle|GO:0044424,intracellular part|GO:0043227,membrane-bounded organelle|GO:0043226,organelle	GO:0043168,anion binding|GO:0050662,coenzyme binding|GO:0016629,12-oxophytodienoate reductase activity|GO:0016628,oxidoreductase activity, acting on the CH-CH group of donors, NAD or NADP as acceptor|GO:0097367,carbohydrate derivative binding|GO:0097159,organic cyclic compound binding|GO:0016627,oxidoreductase activity, acting on the CH-CH group of donors|GO:0000166,nucleotide binding|GO:0036094,…	ath01110,Biosynthesis of secondary metabolites|ath01100,Metabolic pathways|ath00592,alpha-Linolenic acid metabolism	http://www.uniprot.org/uniprot/Q9FUP0
1068	phenylalanine ammonia-lyase family protein	gi|566176021	2.38±0.74	P35510	PAL1	GO:0080090,regulation of primary metabolic process|GO:0019222,regulation of metabolic process|GO:0009074,aromatic amino acid family catabolic process|GO:0009696,salicylic acid metabolic process|GO:0044281,small molecule metabolic process|GO:0044282,small molecule catabolic process|GO:0044283,small molecule biosynthetic process|GO:0009698,phenylpropanoid metabolic process|GO:0009699,phenylpropanoi…	GO:0005737,cytoplasm|GO:0044464,cell part|GO:0005623,cell|GO:0005622,intracellular|GO:0044424,intracellular part	GO:0016841,ammonia-lyase activity|GO:0016840,carbon-nitrogen lyase activity|GO:0016829,lyase activity|GO:0003824,catalytic activity|GO:0045548,phenylalanine ammonia-lyase activity|GO:0005488,binding|GO:0005515,protein binding	ath00940,Phenylpropanoid biosynthesis|ath01100,Metabolic pathways|ath00360,Phenylalanine metabolism|ath01110,Biosynthesis of secondary metabolites	http://www.uniprot.org/uniprot/P35510
1139	PREDICTED: cysteine proteinase inhibitor 6-like	gi|743817669	3.03±1.07	Q8H0X6	CYS6	GO:0009628,response to abiotic stimulus|GO:0009892,negative regulation of metabolic process|GO:0080090,regulation of primary metabolic process|GO:0019222,regulation of metabolic process|GO:0031324,negative regulation of cellular metabolic process|GO:0031323,regulation of cellular metabolic process|GO:0009409,response to cold|GO:0006972,hyperosmotic response|GO:0009414,response to water deprivatio…	GO:0005737,cytoplasm|GO:0005783,endoplasmic reticulum|GO:0005829,cytosol|GO:0044464,cell part|GO:0044444,cytoplasmic part|GO:0005623,cell|GO:0005622,intracellular|GO:0043229,intracellular organelle|GO:0005576,extracellular region|GO:0012505,endomembrane system|GO:0044424,intracellular part|GO:0043227,membrane-bounded organelle|GO:0043226,organelle|GO:0043231,intracellular membrane-bounded organel…	GO:0043169,cation binding|GO:0050897,cobalt ion binding|GO:0004866,endopeptidase inhibitor activity|GO:0046914,transition metal ion binding|GO:0061135,endopeptidase regulator activity|GO:0061134,peptidase regulator activity|GO:0043167,ion binding|GO:0046872,metal ion binding|GO:0005515,protein binding|GO:0030414,peptidase inhibitor activity|GO:0004869,cysteine-type endopeptidase inhibitor activit…		http://www.uniprot.org/uniprot/Q8H0X6
1499	hypothetical protein POPTR_0009s03520g, partial	gi|566186111	0.13±0.05	P13853	HSP17.6C	GO:0006457,protein folding|GO:0009314,response to radiation|GO:0000302,response to reactive oxygen species|GO:0009416,response to light stimulus|GO:0042221,response to chemical|GO:0044267,cellular protein metabolic process|GO:0051716,cellular response to stimulus|GO:0010035,response to inorganic substance|GO:0044260,cellular macromolecule metabolic process|GO:0006979,response to oxidative stress|…	GO:0005737,cytoplasm|GO:0044464,cell part|GO:0005623,cell|GO:0005622,intracellular|GO:0044424,intracellular part		ath04141,Protein processing in endoplasmic reticulum	http://www.uniprot.org/uniprot/P13853
1523	class III peroxidase	gi|591403292	2.17±0.6	Q9LE15	PER4	GO:0044248,cellular catabolic process|GO:0042744,hydrogen peroxide catabolic process|GO:0042743,hydrogen peroxide metabolic process|GO:0036294,cellular response to decreased oxygen levels|GO:0070887,cellular response to chemical stimulus|GO:0001666,response to hypoxia|GO:0044699,single-organism process|GO:0044712,single-organism catabolic process|GO:0044710,single-organism metabolic process|GO:00…	GO:0005576,extracellular region	GO:0043169,cation binding|GO:0046872,metal ion binding|GO:0020037,heme binding|GO:0046906,tetrapyrrole binding|GO:0097159,organic cyclic compound binding|GO:0016209,antioxidant activity|GO:0043167,ion binding|GO:1901363,heterocyclic compound binding|GO:0003824,catalytic activity|GO:0005488,binding|GO:0016684,oxidoreductase activity, acting on peroxide as acceptor|GO:0004601,peroxidase activity|GO…	ath00940,Phenylpropanoid biosynthesis|ath01100,Metabolic pathways|ath01110,Biosynthesis of secondary metabolites	http://www.uniprot.org/uniprot/Q9LE15
1541	hypothetical protein POPTR_0004s22180g	gi|566167975	4.02±1.13	Q9FUP0	OPR3	GO:0009738,abscisic acid-activated signaling pathway|GO:0050794,regulation of cellular process|GO:0009694,jasmonic acid metabolic process|GO:0009695,jasmonic acid biosynthetic process|GO:0007165,signal transduction|GO:0044282,small molecule catabolic process|GO:0044283,small molecule biosynthetic process|GO:1901362,organic cyclic compound biosynthetic process|GO:1901360,organic cyclic compound me…	GO:0005737,cytoplasm|GO:0043231,intracellular membrane-bounded organelle|GO:0044464,cell part|GO:0005777,peroxisome|GO:0044444,cytoplasmic part|GO:0005623,cell|GO:0005622,intracellular|GO:0042579,microbody|GO:0043229,intracellular organelle|GO:0044424,intracellular part|GO:0043227,membrane-bounded organelle|GO:0043226,organelle	GO:0043168,anion binding|GO:0050662,coenzyme binding|GO:0016629,12-oxophytodienoate reductase activity|GO:0016628,oxidoreductase activity, acting on the CH-CH group of donors, NAD or NADP as acceptor|GO:0097367,carbohydrate derivative binding|GO:0097159,organic cyclic compound binding|GO:0016627,oxidoreductase activity, acting on the CH-CH group of donors|GO:0000166,nucleotide binding|GO:0036094,…	ath01110,Biosynthesis of secondary metabolites|ath01100,Metabolic pathways|ath00592,alpha-Linolenic acid metabolism	http://www.uniprot.org/uniprot/Q9FUP0
