# Supplementary material for: The photo-inhibition of camphor leaves (Cinnamomum camphora L.) by NaCl stress based on physiological, chloroplast structure and comparative proteomic analysis
Source: PeerJ. 2020 Aug 7;8:e9443. doi: 10.7717/peerj.9443 (PMC7486828; doi:10.7717/peerj.9443)
Supplement: Table S4 [file peerj-08-9443-s006.xlsx]

## Sheet: Table S4
Table. S4 The effective DEPs enriched on oxidative process according to biological process analysis
N	Primary protein ID	Protein name	Uniprot	Genename	Mean ratio (±SD)	Biological Process
196	gi|566175391	18.2 kDa class I heat shock family protein	P19037	HSP18.1	0.09±0.04	GO:0006635,fatty acid beta-oxidation|GO:0042542,response to hydrogen peroxide
483	gi|566167461	17.6 kDa class I small heat shock family protein	Q9ZW31	HSP17.6B	0.35±0.11	GO:0006979,response to oxidative stress|GO:0042542,response to hydrogen peroxide
440	gi|224120952	heat shock 22K family protein	P31170	HSP25.3	0.3±0.02	GO:0006979,response to oxidative stress|GO:0042542,response to hydrogen peroxide
292	gi|566168071	Superoxide dismutase family protein	O78310	CSD2	0.1±0.02	GO:0006979,response to oxidative stress|GO:0055114,oxidation-reduction process
579	gi|224094610	O2 evolving complex 33kD family protein	Q9S841	PSBO2	0.23±0.17	GO:0006733,oxidoreduction coenzyme metabolic process|GO:0010310,regulation of hydrogen peroxide metabolic process|GO:0042743,hydrogen peroxide metabolic process|GO:0055114,oxidation-reduction process
1028	gi|224056321	malate dehydrogenase family protein	O82399	At2g22780	0.5±0.04	GO:0006635,fatty acid beta-oxidation|GO:0007031,peroxisome organization|GO:0015980,energy derivation by oxidation of organic compounds|GO:0019395,fatty acid oxidationGO:0034440,lipid oxidation|GO:0055114,oxidation-reduction process
1047	gi|224067920	Mitogen-activated protein kinase 4	Q39024	MPK4	0.47±0.02	GO:0006733,oxidoreduction coenzyme metabolic process|GO:0010310,regulation of hydrogen peroxide metabolic process|GO:0042743,hydrogen peroxide metabolic process
184	gi|566179485	alcohol-dehydrogenase family protein	Q96533	ADH2	2.93±1.4	GO:0006069,ethanol oxidation|GO:0055114,oxidation-reduction process
1523	gi|591403292	class III peroxidase	Q9LE15	PER4	2.17±0.6	GO:0006979,response to oxidative stress|GO:0042743,hydrogen peroxide metabolic process|GO:0042744,hydrogen peroxide catabolic process|GO:0055114,oxidation-reduction process
41	gi|743921083	PREDICTED: oxygen-evolving enhancer protein 1, chloroplastic	Q9S841	PSBO2	0.12±0.01	GO:0006733,oxidoreduction coenzyme metabolic process|GO:0010310,regulation of hydrogen peroxide metabolic process|GO:0042743,hydrogen peroxide metabolic process|GO:0055114,oxidation-reduction process
42	gi|743875087	PREDICTED: glyceraldehyde-3-phosphate dehydrogenase B, chloroplastic isoform X1	P25857	GAPB	0.32±0.03	GO:0006733,oxidoreduction coenzyme metabolic process|GO:0042743,hydrogen peroxide metabolic process|GO:0042744,hydrogen peroxide catabolic process|GO:0055114,oxidation-reduction process
48	gi|743924688	PREDICTED: presequence protease 1, chloroplastic/mitochondrial	Q9LJL3	PREP1	2.3±0.09	GO:0042743,hydrogen peroxide metabolic process|GO:0042744,hydrogen peroxide catabolic process
58	gi|743926242	PREDICTED: chaperone protein ClpB1	P42730	CLPB1	0.23±0.01	GO:0006979,response to oxidative stress|GO:0042542,response to hydrogen peroxide
66	gi|743906507	PREDICTED: glycerate dehydrogenase	Q9C9W5	HPR	0.4±0.04	GO:0009854,oxidative photosynthetic carbon pathway|GO:0055114,oxidation-reduction process
89	gi|743879686	PREDICTED: sedoheptulose-1,7-bisphosphatase, chloroplastic	P46283	At3g55800	0.19±0.05	GO:0006733,oxidoreduction coenzyme metabolic process|GO:0010310,regulation of hydrogen peroxide metabolic process|GO:0042743,hydrogen peroxide metabolic process|GO:0055114,oxidation-reduction process
93	gi|743885735	PREDICTED: ATP synthase gamma chain, chloroplastic	Q01908	ATPC1	0.41±0.07	GO:0006733,oxidoreduction coenzyme metabolic process|GO:0055114,oxidation-reduction process
95	gi|743895899	PREDICTED: catalase isozyme 1	P25819	CAT2	0.38±0.06	GO:0006979,response to oxidative stress|GO:0042743,hydrogen peroxide metabolic process|GO:0042744,hydrogen peroxide catabolic process|GO:0055114,oxidation-reduction process
153	gi|743840443	PREDICTED: oxygen-evolving enhancer protein 2, chloroplastic-like	Q42029	PSBP1	0.12±0.01	GO:0010310,regulation of hydrogen peroxide metabolic process|GO:0042743,hydrogen peroxide metabolic process|GO:0055114,oxidation-reduction process
176	gi|743822923	PREDICTED: malate dehydrogenase, glyoxysomal	O82399	At2g22780	0.22±0.1	GO:0006635,fatty acid beta-oxidation|GO:0007031,peroxisome organization|GO:0015980,energy derivation by oxidation of organic compounds|GO:0019395,fatty acid oxidationGO:0034440,lipid oxidation|GO:0055114,oxidation-reduction process
205	gi|743889355	PREDICTED: probable fructose-bisphosphate aldolase 3, chloroplastic	Q9ZU52	FBA3	3.25±1.48	GO:0006733,oxidoreduction coenzyme metabolic process|GO:0006979,response to oxidative stress
210	gi|743819545	PREDICTED: uncharacterized protein LOC105123107	Q9LYR4	T22N19_70	2.03±0.56	GO:0006733,oxidoreduction coenzyme metabolic process|GO:0015980,energy derivation by oxidation of organic compounds|GO:0055114,oxidation-reduction process
224	gi|743924958	PREDICTED: pyruvate dehydrogenase E1 component subunit alpha, mitochondrial-like	P52901	E1 ALPHA	3.1±0.27	GO:0006733,oxidoreduction coenzyme metabolic process|GO:0055114,oxidation-reduction process
240	gi|743916626	PREDICTED: citrate synthase, mitochondrial isoform X4	P20115	CSY4	3.61±0.77	GO:0006733,oxidoreduction coenzyme metabolic process|GO:0015980,energy derivation by oxidation of organic compounds|GO:0055114,oxidation-reduction process
253	gi|743810316	PREDICTED: cytochrome b6	P56773	petB	0.19±0.04	GO:0015980,energy derivation by oxidation of organic compounds|GO:0055114,oxidation-reduction process
297	gi|743795553	PREDICTED: malate dehydrogenase, glyoxysomal	O82399	At2g22780	0.2±0.05	GO:0006635,fatty acid beta-oxidation|GO:0007031,peroxisome organization|GO:0015980,energy derivation by oxidation of organic compounds|GO:0019395,fatty acid oxidationGO:0034440,lipid oxidation|GO:0055114,oxidation-reduction process
334	gi|743844327	PREDICTED: probable mediator of RNA polymerase II transcription subunit 37c isoform X2	Q9LHA8	MED37C	0.31±0.05	GO:0006979,response to oxidative stress|GO:0042542,response to hydrogen peroxide
402	gi|743912326	PREDICTED: probable aldo-keto reductase 2	Q93ZN2	At1g60710	2.11±0.71	GO:0006733,oxidoreduction coenzyme metabolic process|GO:0055114,oxidation-reduction process
421	gi|743812897	PREDICTED: 17.9 kDa class II heat shock protein-like	P29830	HSP17.6	0.13±0.01	GO:0006979,response to oxidative stress|GO:0042542,response to hydrogen peroxide
449	gi|743811825	PREDICTED: probable pyridoxal biosynthesis protein PDX1	Q8L940	PDX13	0.43±0.05	GO:0006733,oxidoreduction coenzyme metabolic process|GO:0006979,response to oxidative stress|GO:0006982,response to lipid hydroperoxide|GO:0033194,response to hydroperoxide
450	gi|743899195	PREDICTED: peroxidase 12-like	Q96520	PER12	4.27±0.28	GO:0006979,response to oxidative stress|GO:0042743,hydrogen peroxide metabolic process|GO:0042744,hydrogen peroxide catabolic process|GO:0055114,oxidation-reduction process
452	gi|743907790	PREDICTED: isocitrate dehydrogenase NADP	Q8LPJ5	At5g14590	0.47±0.07	GO:0015980,energy derivation by oxidation of organic compounds|GO:0055114,oxidation-reduction process
493	gi|743928577	PREDICTED: uncharacterized protein LOC105113849	Q9FX85	PER10	0.46±0.1	GO:0006979,response to oxidative stress|GO:0042743,hydrogen peroxide metabolic process|GO:0042744,hydrogen peroxide catabolic process|GO:0055114,oxidation-reduction process
499	gi|743874087	PREDICTED: heat shock 70 kDa protein isoform X2	Q9LHA8	MED37C	0.33±0.04	GO:0006979,response to oxidative stress|GO:0042542,response to hydrogen peroxide
506	gi|743937119	PREDICTED: fructose-1,6-bisphosphatase, chloroplastic-like	P25851	FBP	0.46±0.01	GO:0006733,oxidoreduction coenzyme metabolic process|GO:0055114,oxidation-reduction process
515	gi|743879261	PREDICTED: ferritin-3, chloroplastic-like	Q9SRL5	FER2	4.83±0.7	GO:0006979,response to oxidative stress|GO:0055114,oxidation-reduction process
596	gi|743814108	PREDICTED: aspartate aminotransferase, cytoplasmic	P46644	ASP3	3.17±1.13	GO:0006635,fatty acid beta-oxidation|GO:0019395,fatty acid oxidation|GO:0034440,lipid oxidation|GO:0055114,oxidation-reduction process
703	gi|743832246	PREDICTED: vacuolar protein sorting-associated protein 4B-like	Q9ZNT0	SKD1	0.31±0.11	GO:0006635,fatty acid beta-oxidation|GO:0007031,peroxisome organization|GO:0019395,fatty acid oxidation|GO:0034440,lipid oxidationGO:0055114,oxidation-reduction process
813	gi|743796298	PREDICTED: uncharacterized protein LOC105111212	O24520	AHB1	2.13±0.11	GO:0010310,regulation of hydrogen peroxide metabolic process|GO:0042743,hydrogen peroxide metabolic process
866	gi|743910930	PREDICTED: pyruvate dehydrogenase (acetyl-transferring) kinase, mitochondrial	P49333	ETR1	2.65±1.44	GO:0042743,hydrogen peroxide metabolic process|GO:0050665,hydrogen peroxide biosynthetic process
931	gi|743794407	PREDICTED: presequence protease 1, chloroplastic/mitochondrial isoform X2	Q9LJL3	PREP1	2.46±0.13	GO:0042743,hydrogen peroxide metabolic process|GO:0042744,hydrogen peroxide catabolic process
962	gi|743852770	PREDICTED: monodehydroascorbate reductase, chloroplastic	P92947	At1g63940	2±0.1	GO:0042743,hydrogen peroxide metabolic process|GO:0042744,hydrogen peroxide catabolic process|GO:0055114,oxidation-reduction process
996	gi|743881832	PREDICTED: ATP synthase subunit b', chloroplastic-like	Q42139	F10M6.100	0.4±0.22	GO:0006733,oxidoreduction coenzyme metabolic process|GO:0010310,regulation of hydrogen peroxide metabolic process|GO:0042743,hydrogen peroxide metabolic process
1213	gi|743932656	PREDICTED: hevamine-A-like	P19172	CHIB1	3.17±0.35	GO:0042743,hydrogen peroxide metabolic process|GO:0050665,hydrogen peroxide biosynthetic process
1401	gi|743939144	PREDICTED: uncharacterized protein LOC105117914	Q8RXS1	PNSB4	0.36±0.01	GO:0006733,oxidoreduction coenzyme metabolic process|GO:0055114,oxidation-reduction process
1473	gi|743899657	PREDICTED: nitronate monooxygenase	Q24JJ8	GLO3	10.33±7.96	GO:0009854,oxidative photosynthetic carbon pathway|GO:0042743,hydrogen peroxide metabolic process|GO:0050665,hydrogen peroxide biosynthetic process|GO:0055114,oxidation-reduction process
1534	gi|743928583	PREDICTED: NAD(P)H-quinone oxidoreductase subunit N, organellar chromatophore	Q9LVM2	ndhN	0.34±0.14	GO:0006733,oxidoreduction coenzyme metabolic process|GO:0055114,oxidation-reduction process
413	gi|566151722	hypothetical protein POPTR_0001s29700g	Q9LMU1	EGY3	0.33±0.21	GO:0006979,response to oxidative stress|GO:0042542,response to hydrogen peroxide
223	gi|566187985	hypothetical protein POPTR_0009s14500g	Q1H537	DVR	0.48±0.04	GO:0006733,oxidoreduction coenzyme metabolic process|GO:0055114,oxidation-reduction process
386	gi|566189392	hypothetical protein POPTR_0010s06320g	P31170	HSP25.3	0.33±0.09	GO:0006979,response to oxidative stress|GO:0042542,response to hydrogen peroxide
389	gi|566190935	hypothetical protein POPTR_0010s15200g	A8MS68	LPD1	2.84±1.48	GO:0042743,hydrogen peroxide metabolic process|GO:0042744,hydrogen peroxide catabolic process|GO:0055114,oxidation-reduction process
620	gi|566165056	hypothetical protein POPTR_0004s05340g	Q9ZP06	At1g53240	0.28±0.05	GO:0006733,oxidoreduction coenzyme metabolic process|GO:0015980,energy derivation by oxidation of organic compounds|GO:0055114,oxidation-reduction process
817	gi|566206271	hypothetical protein POPTR_0015s06770g	P42730	CLPB1	0.29±0.05	GO:0006979,response to oxidative stress|GO:0042542,response to hydrogen peroxide
1034	gi|566148978	hypothetical protein POPTR_0001s14630g	Q9M9E1	ABCG40	2.15±1.24	GO:0006979,response to oxidative stress|GO:0010310,regulation of hydrogen peroxide metabolic process|GO:0042743,hydrogen peroxide metabolic process
1055	gi|566176419	hypothetical protein POPTR_0006s14520g	Q9FUP0	OPR3	3.06±0.49	GO:0006979,response to oxidative stress|GO:0055114,oxidation-reduction process
1098	gi|566209778	hypothetical protein POPTR_0016s11621g	P25851	FBP	0.39±0.1	GO:0006733,oxidoreduction coenzyme metabolic process|GO:0055114,oxidation-reduction process
1499	gi|566186111	hypothetical protein POPTR_0009s03520g	P13853	HSP17.6C	0.13±0.05	GO:0006979,response to oxidative stress|GO:0042542,response to hydrogen peroxide
1541	gi|566167975	hypothetical protein POPTR_0004s22180g	Q9FUP0	OPR3	4.02±1.13	GO:0006979,response to oxidative stress|GO:0055114,oxidation-reduction process
